# Supplementary material
Source: PubMed Central journal article supplement (PMC3035712)
Supplement: mmc1.pdf [file mmc1.pdf]

**Supplemental Data**  
**American Journal of Human Genetics, Volume 88**

**Development and Validation of a Computational**

**Method for Assessment of Missense Variants**

**in Hypertrophic Cardiomyopathy**

Daniel M. Jordan, Adam Kiezun, Samantha M. Baxter, Vineeta Agarwala, Robert C. Green, Michael F. Murray, Trevor Pugh, Matthew S. Lebo, Heidi L. Rehm, Birgit H. Funke, Shamil R. Sunyaev

**Table S1. The 74 Gold Standard Variants**

This table shows the 74 HCM variants we used as our gold standard.

| Gene   | NCBI mRNA accession | NCBI protein accession | cDNA change | Amino acid change | Classification |
|--------|---------------------|------------------------|-------------|-------------------|----------------|
| MYBPC3 | NM_000256.3         | NP_000247.2            | c.440C>T    | p.Pro147Leu       | Likely Benign  |
| MYBPC3 | NM_000256.3         | NP_000247.2            | c.472G>A    | p.Val158Met       | Benign         |
| MYBPC3 | NM_000256.3         | NP_000247.2            | c.565G>A    | p.Val189Ile       | Likely Benign  |
| MYBPC3 | NM_000256.3         | NP_000247.2            | c.706A>G    | p.Ser236Gly       | Benign         |
| MYBPC3 | NM_000256.3         | NP_000247.2            | c.772G>A    | p.Glu258Lys       | Pathogenic     |
| MYBPC3 | NM_000256.3         | NP_000247.2            | c.833G>A    | p.Gly278Glu       | Likely Benign  |
| MYBPC3 | NM_000256.3         | NP_000247.2            | c.842G>A    | p.Arg281Gln       | Likely Benign  |
| MYBPC3 | NM_000256.3         | NP_000247.2            | c.977G>A    | p.Arg326Gln       | Benign         |
| MYBPC3 | NM_000256.3         | NP_000247.2            | c.1144C>T   | p.Arg382Trp       | Benign         |
| MYBPC3 | NM_000256.3         | NP_000247.2            | c.1147C>G   | p.Leu383Val       | Likely Benign  |
| MYBPC3 | NM_000256.3         | NP_000247.2            | c.1246G>A   | p.Gly416Ser       | Likely Benign  |
| MYBPC3 | NM_000256.3         | NP_000247.2            | c.1351G>C   | p.Glu451Gln       | Pathogenic     |
| MYBPC3 | NM_000256.3         | NP_000247.2            | c.1484G>A   | p.Arg495Gln       | Pathogenic     |
| MYBPC3 | NM_000256.3         | NP_000247.2            | c.1505G>A   | p.Arg502Gln       | Pathogenic     |
| MYBPC3 | NM_000256.3         | NP_000247.2            | c.1504C>T   | p.Arg502Trp       | Pathogenic     |
| MYBPC3 | NM_000256.3         | NP_000247.2            | c.1519G>A   | p.Gly507Arg       | Likely Benign  |
| MYBPC3 | NM_000256.3         | NP_000247.2            | c.1564G>A   | p.Ala522Thr       | Likely Benign  |
| MYBPC3 | NM_000256.3         | NP_000247.2            | c.1633C>A   | p.Leu545Met       | Likely Benign  |
| MYBPC3 | NM_000256.3         | NP_000247.2            | c.2063C>A   | p.Thr688Lys       | Likely Benign  |
| MYBPC3 | NM_000256.3         | NP_000247.2            | c.2265C>A   | p.Asn755Lys       | Pathogenic     |
| MYBPC3 | NM_000256.3         | NP_000247.2            | c.2410C>A   | p.Leu804Met       | Likely Benign  |
| MYBPC3 | NM_000256.3         | NP_000247.2            | c.2498C>T   | p.Ala833Val       | Benign         |
| MYBPC3 | NM_000256.3         | NP_000247.2            | c.2686G>A   | p.Val896Met       | Likely Benign  |
| MYBPC3 | NM_000256.3         | NP_000247.2            | c.3004C>T   | p.Arg1002Trp      | Likely Benign  |
| MYBPC3 | NM_000256.3         | NP_000247.2            | c.3142C>T   | p.Arg1048Cys      | Likely Benign  |
| MYBPC3 | NM_000256.3         | NP_000247.2            | c.3413G>A   | p.Arg1138His      | Likely Benign  |
| MYH7   | NM_000257.2         | NP_000248.2            | c.8A>C      | p.Asp3Ala         | Likely Benign  |
| MYH7   | NM_000257.2         | NP_000248.2            | c.321T>G    | p.Asp107Glu       | Likely Benign  |
| MYH7   | NM_000257.2         | NP_000248.2            | c.438G>T    | p.Lys146Asn       | Pathogenic     |
| MYH7   | NM_000257.2         | NP_000248.2            | c.767G>A    | p.Gly256Glu       | Pathogenic     |
| MYH7   | NM_000257.2         | NP_000248.2            | c.1208G>A   | p.Arg403Gln       | Pathogenic     |
| MYH7   | NM_000257.2         | NP_000248.2            | c.1207C>T   | p.Arg403Trp       | Pathogenic     |
| MYH7   | NM_000257.2         | NP_000248.2            | c.1357C>T   | p.Arg453Cys       | Pathogenic     |
| MYH7   | NM_000257.2         | NP_000248.2            | c.1750G>C   | p.Gly584Arg       | Pathogenic     |
| MYH7   | NM_000257.2         | NP_000248.2            | c.1816G>A   | p.Val606Met       | Pathogenic     |
| MYH7   | NM_000257.2         | NP_000248.2            | c.1988G>A   | p.Arg663His       | Pathogenic     |

|       |                |                |           |              |               |
|-------|----------------|----------------|-----------|--------------|---------------|
| MYH7  | NM_000257.2    | NP_000248.2    | c.2146G>A | p.Gly716Arg  | Pathogenic    |
| MYH7  | NM_000257.2    | NP_000248.2    | c.2156G>A | p.Arg719Gln  | Pathogenic    |
| MYH7  | NM_000257.2    | NP_000248.2    | c.2155C>T | p.Arg719Trp  | Pathogenic    |
| MYH7  | NM_000257.2    | NP_000248.2    | c.2167C>T | p.Arg723Cys  | Pathogenic    |
| MYH7  | NM_000257.2    | NP_000248.2    | c.2167C>G | p.Arg723Gly  | Pathogenic    |
| MYH7  | NM_000257.2    | NP_000248.2    | c.2221G>T | p.Gly741Trp  | Pathogenic    |
| MYH7  | NM_000257.2    | NP_000248.2    | c.2389G>A | p.Ala797Thr  | Pathogenic    |
| MYH7  | NM_000257.2    | NP_000248.2    | c.2609G>A | p.Arg870His  | Pathogenic    |
| MYH7  | NM_000257.2    | NP_000248.2    | c.2717A>G | p.Asp906Gly  | Pathogenic    |
| MYH7  | NM_000257.2    | NP_000248.2    | c.2722C>G | p.Leu908Val  | Pathogenic    |
| MYH7  | NM_000257.2    | NP_000248.2    | c.2770G>A | p.Glu924Lys  | Pathogenic    |
| MYH7  | NM_000257.2    | NP_000248.2    | c.2788G>A | p.Glu930Lys  | Pathogenic    |
| MYH7  | NM_000257.2    | NP_000248.2    | c.3981C>A | p.Asn1327Lys | Likely Benign |
| MYH7  | NM_000257.2    | NP_000248.2    | c.4135G>A | p.Ala1379Thr | Pathogenic    |
| MYH7  | NM_000257.2    | NP_000248.2    | c.4472C>G | p.Ser1491Cys | Benign        |
| MYH7  | NM_000257.2    | NP_000248.2    | c.4555A>T | p.Ser1519Cys | Likely Benign |
| MYL2  | NM_000432.3    | NP_000423.2    | c.64G>A   | p.Glu22Lys   | Pathogenic    |
| MYL2  | NM_000432.3    | NP_000423.2    | c.173G>A  | p.Arg58Gln   | Pathogenic    |
| TNNI3 | NM_000363.4    | NP_000354.4    | c.235C>T  | p.Arg79Cys   | Likely Benign |
| TNNI3 | NM_000363.4    | NP_000354.4    | c.244C>T  | p.Pro82Ser   | Likely Benign |
| TNNI3 | NM_000363.4    | NP_000354.4    | c.244C>A  | p.Pro82Thr   | Likely Benign |
| TNNI3 | NM_000363.4    | NP_000354.4    | c.253T>A  | p.Leu85Met   | Likely Benign |
| TNNI3 | NM_000363.4    | NP_000354.4    | c.257C>A  | p.Ala86Asp   | Likely Benign |
| TNNI3 | NM_000363.4    | NP_000354.4    | c.433C>G  | p.Arg145Gly  | Pathogenic    |
| TNNI3 | NM_000363.4    | NP_000354.4    | c.433C>T  | p.Arg145Trp  | Pathogenic    |
| TNNI3 | NM_000363.4    | NP_000354.4    | c.470C>T  | p.Ala157Val  | Pathogenic    |
| TNNI3 | NM_000363.4    | NP_000354.4    | c.485G>A  | p.Arg162Gln  | Pathogenic    |
| TNNI3 | NM_000363.4    | NP_000354.4    | c.557G>A  | p.Arg186Gln  | Pathogenic    |
| TNNI3 | NM_000363.4    | NP_000354.4    | c.575G>A  | p.Arg192His  | Pathogenic    |
| TNNT2 | NM_001001430.1 | NP_001001430.1 | c.236T>A  | p.Ile79Asn   | Pathogenic    |
| TNNT2 | NM_001001430.1 | NP_001001430.1 | c.275G>A  | p.Arg92Gln   | Pathogenic    |
| TNNT2 | NM_001001430.1 | NP_001001430.1 | c.274C>T  | p.Arg92Trp   | Pathogenic    |
| TNNT2 | NM_001001430.1 | NP_001001430.1 | c.421C>T  | p.Arg141Trp  | Pathogenic    |
| TNNT2 | NM_001001430.1 | NP_001001430.1 | c.682C>G  | p.Gln228Glu  | Likely Benign |
| TNNT2 | NM_001001430.1 | NP_001001430.1 | c.758A>G  | p.Lys253Arg  | Benign        |
| TNNT2 | NM_001001430.1 | NP_001001430.1 | c.805A>T  | p.Asn269Tyr  | Likely Benign |
| TPM1  | NM_000366.5    | NP_000357.3    | c.523G>A  | p.Asp175Asn  | Pathogenic    |
| TPM1  | NM_000366.5    | NP_000357.3    | c.688G>A  | p.Asp230Asn  | Pathogenic    |

**Table S2. The Four Classification Scores**

This table shows the 74 gold standard variants with the four scores described in the text.

| Protien variant          | Classification | PolyPhen score | MrBayes score | COILS score | Structure score       |
|--------------------------|----------------|----------------|---------------|-------------|-----------------------|
| NP_000247.2:p.Pro147Leu  | Likely Benign  | 0.364          | 1.773516      |             |                       |
| NP_000247.2:p.Val158Met  | Benign         | 0.038          | 1.831546      |             |                       |
| NP_000247.2:p.Val189Ile  | Likely Benign  | 0.206          | 1.162951      |             |                       |
| NP_000247.2:p.Ser236Gly  | Benign         | 0.001          | 1.430759      |             |                       |
| NP_000247.2: p.Glu258Lys | Pathogenic     | 0.196          | 1.118029      |             |                       |
| NP_000247.2:p.Gly278Glu  | Likely Benign  | 0.66           | 1.212166      |             |                       |
| NP_000247.2:p.Arg281Gln  | Likely Benign  | 0.049          | 1.654965      |             |                       |
| NP_000247.2:p.Arg326Gln  | Benign         | 0.054          | 0.827841      |             |                       |
| NP_000247.2:p.Arg382Trp  | Benign         | 0.894          | 1.103284      |             |                       |
| NP_000247.2:p.Leu383Val  | Likely Benign  | 0.562          | 0.590754      |             |                       |
| NP_000247.2:p.Gly416Ser  | Likely Benign  | 0.989          | 0.186616      |             |                       |
| NP_000247.2:p.Glu451Gln  | Pathogenic     | 0.935          | 0.190564      |             |                       |
| NP_000247.2:p.Arg495Gln  | Pathogenic     | 0.994          | 0.187814      |             |                       |
| NP_000247.2:p.Arg502Gln  | Pathogenic     | 0.994          | 0.187814      |             |                       |
| NP_000247.2:p.Arg502Trp  | Pathogenic     | 0.997          | 0.187814      |             |                       |
| NP_000247.2:p.Gly507Arg  | Likely Benign  | 0.994          | 0.186616      |             |                       |
| NP_000247.2:p.Ala522Thr  | Likely Benign  | 0.006          | 2.367328      |             |                       |
| NP_000247.2:p.Leu545Met  | Likely Benign  | 0.919          | 0.1892        |             |                       |
| NP_000247.2:p.Thr688Lys  | Likely Benign  | 0.008          | 2.221069      |             |                       |
| NP_000247.2:p.Asn755Lys  | Pathogenic     | 0.997          | 0.185634      |             |                       |
| NP_000247.2:p.Leu804Met  | Likely Benign  | 0.207          | 0.826993      |             |                       |
| NP_000247.2:p.Ala833Val  | Benign         | 0.424          | 0.60121       |             |                       |
| NP_000247.2:p.Val896Met  | Likely Benign  | 0.004          | 1.020041      |             |                       |
| NP_000247.2:p.Arg1002Trp | Likely Benign  | 0.998          | 0.187814      |             |                       |
| NP_000247.2:p.Arg1048Cys | Likely Benign  | 0.791          | 1.075026      |             |                       |
| NP_000247.2:p.Arg1138His | Likely Benign  | 0.993          | 0.187856      |             |                       |
| NP_000248.2:p.Asp3Ala    | Likely Benign  | 0.985          | 0.40412       |             |                       |
| NP_000248.2:p.Asp107Glu  | Likely Benign  | 0.011          | 0.817473      |             | 0.72368466<br>6666667 |
| NP_000248.2:p.Lys146Asn  | Pathogenic     | 0.578          | 0.349745      |             | 0.60734016<br>6666667 |

|                          |               |       |          |       |                       |
|--------------------------|---------------|-------|----------|-------|-----------------------|
| NP_000248.2:p.Gly256Glu  | Pathogenic    | 0.999 | 0.064077 |       | 0.80517505<br>5555556 |
| NP_000248.2:p.Arg403Gln  | Pathogenic    | 0.99  | 0.232634 |       | 0.63606105<br>5555556 |
| NP_000248.2:p.Arg403Trp  | Pathogenic    | 0.999 | 0.232634 |       | 0.63606105<br>5555556 |
| NP_000248.2:p.Arg453Cys  | Pathogenic    | 0.999 | 0.259414 |       | 0.65229627<br>7777778 |
| NP_000248.2:p.Gly584Arg  | Pathogenic    | 0.998 | 0.064077 |       | 0.668971              |
| NP_000248.2:p.Val606Met  | Pathogenic    | 0.959 | 0.578037 |       | 0.70363694<br>4444445 |
| NP_000248.2:p.Arg663His  | Pathogenic    | 0.434 | 0.658202 |       | 0.76842466<br>6666667 |
| NP_000248.2:p.Gly716Arg  | Pathogenic    | 0.996 | 1.240913 |       | 0.88685983<br>3333333 |
| NP_000248.2:p.Arg719Gln  | Pathogenic    | 0.383 | 0.251198 |       | 0.919598              |
| NP_000248.2:p.Arg719Trp  | Pathogenic    | 0.888 | 0.251198 |       | 0.919598              |
| NP_000248.2:p.Arg723Cys  | Pathogenic    | 1     | 0.675437 |       | 0.92658494<br>4444444 |
| NP_000248.2:p.Arg723Gly  | Pathogenic    | 0.999 | 0.675437 |       | 0.92658494<br>4444444 |
| NP_000248.2:p.Gly741Trp  | Pathogenic    | 0.612 | 0.462298 |       | 0.93406116<br>6666667 |
| NP_000248.2:p.Ala797Thr  | Pathogenic    | 0.02  | 0.842704 |       | 0.89172761<br>1111111 |
| NP_000248.2:p.Arg870His  | Pathogenic    | 0.531 | 0.450972 | 0.049 |                       |
| NP_000248.2:p.Asp906Gly  | Pathogenic    | 0.465 | 0.922319 | 0.188 |                       |
| NP_000248.2:p.Leu908Val  | Pathogenic    | 0.917 | 0.13996  | 0.124 |                       |
| NP_000248.2:p.Glu924Lys  | Pathogenic    | 0.96  | 0.267061 | 0.042 |                       |
| NP_000248.2:p.Glu930Lys  | Pathogenic    | 0.96  | 0.065827 | 0.078 |                       |
| NP_000248.2:p.Asn1327Lys | Likely Benign | 0.373 | 0.570145 | 0.02  |                       |
| NP_000248.2:p.Ala1379Thr | Pathogenic    | 0.153 | 0.268716 | 0.125 |                       |
| NP_000248.2:p.Ser1491Cys | Benign        | 0.001 | 2.133482 | 0.003 |                       |
| NP_000248.2:p.Ser1519Cys | Likely Benign | 0.218 | 2.130523 | 0.002 |                       |
| NP_000423.2:p.Glu22Lys   | Pathogenic    | 0.381 |          |       | 0.639643              |
| NP_000423.2:p.Arg58Gln   | Pathogenic    | 0.47  |          |       | 0.70376533<br>3333333 |
| NP_000354.4:p.Arg79Cys   | Likely Benign | 0.874 | 1.560826 |       | 0.590948              |
| NP_000354.4:p.Pro82Ser   | Likely Benign | 0.995 | 0.214355 |       | 0.519521              |
| NP_000354.4:p.Pro82Thr   | Likely Benign | 0.995 | 0.214355 |       | 0.519521              |
| NP_000354.4:p.Leu85Met   | Likely Benign | 0.373 | 0.679624 |       | 0.603625              |
| NP_000354.4:p.Ala86Asp   | Likely Benign | 0.198 | 0.973472 |       | 0.597456              |
| NP_000354.4:p.Arg145Gly  | Pathogenic    | 0.954 | 0.63085  |       | 0.84635               |
| NP_000354.4:p.Arg145Trp  | Pathogenic    | 0.971 | 0.63085  |       | 0.84635               |

|                            |               |       |          |       |          |
|----------------------------|---------------|-------|----------|-------|----------|
| NP_000354.4:p.Ala157Val    | Pathogenic    | 0.887 | 0.399959 |       |          |
| NP_000354.4:p.Arg162Gln    | Pathogenic    | 0.421 | 0.645396 |       |          |
| NP_000354.4:p.Arg186Gln    | Pathogenic    | 0.794 | 0.465974 |       |          |
| NP_000354.4:p.Arg192His    | Pathogenic    | 0.984 | 0.247463 |       |          |
| NP_001001430.1:p.Ile79Asn  | Pathogenic    | 0.985 | 0.151537 |       |          |
| NP_001001430.1:p.Arg92Gln  | Pathogenic    | 0.982 | 0.09613  | 0.091 |          |
| NP_001001430.1:p.Arg92Trp  | Pathogenic    | 0.997 | 0.09613  | 0.201 |          |
| NP_001001430.1:p.Arg141Trp | Pathogenic    | 0.995 | 0.043148 | 0.232 |          |
| NP_001001430.1:p.Gln228Glu | Likely Benign | 0.024 | 0.319379 |       | 0.7008   |
| NP_001001430.1:p.Lys253Arg | Benign        | 0.009 | 0.497708 |       | 0.612637 |
| NP_001001430.1:p.Asn269Tyr | Likely Benign | 0.599 | 0.507608 |       | 0.672594 |
| NP_000357.3:p.Asp175Asn    | Pathogenic    | 0.896 | 0.354401 | 0.031 |          |
| NP_000357.3:p.Asp230Asn    | Pathogenic    | 0.832 | 0.386874 | 0.038 |          |

**Table S3. List of Sequences in the MYH7 Alignment**

This table shows the 68 sequences chosen for the MYH7 alignment and the UniProt or UniParc accessions used to refer to them in figure S2, ordered by sequence similarity to human MYH7. “MyH” in the description column indicates myosin heavy chain.

|           | <b>Accession</b> | <b>Species</b>                           | <b>Description</b>              |
|-----------|------------------|------------------------------------------|---------------------------------|
| <b>1</b>  | P12883           | Homo sapiens (human)                     | beta cardiac MyH                |
| <b>2</b>  | UPI0000D9BB5C    | Macaca mulatta (Rhesus macaque)          | alpha cardiac MyH               |
| <b>3</b>  | Q91973           | Coturnix coturnix (quail)                | slow muscle MyH                 |
| <b>4</b>  | Q910C5           | Gallus gallus (chicken)                  | chick atrial MyH                |
| <b>5</b>  | Q5EC16           | Xenopus laevis (African clawed frog)     | alpha cardiac MyH               |
| <b>6</b>  | UPI00015A4B13    | Danio rerio (zebrafish)                  | slow muscle MyH                 |
| <b>7</b>  | UPI00015A67FC    | Danio rerio (zebrafish)                  | hypothetical protein            |
| <b>8</b>  | B6IDE0           | Danio rerio (zebrafish)                  | slow muscle MyH                 |
| <b>9</b>  | UPI00016278FC    | Danio rerio (zebrafish)                  | ventricular MyH                 |
| <b>10</b> | B6IDE1           | Danio rerio (zebrafish)                  | slow MyH                        |
| <b>11</b> | Q2HX56           | Cyprinus carpio (common carp)            | embryonic muscle MyH            |
| <b>12</b> | B8JLS3           | Danio rerio (zebrafish)                  | alpha cardiac MyH               |
| <b>13</b> | UPI0000EB3EAF    | Canis lupus (dog)                        | adult skeletal muscle MyH       |
| <b>14</b> | UPI0000DA357F    | Rattus norvegicus (rat)                  | perinatal skeletal muscle MyH   |
| <b>15</b> | Q6DIX8           | Xenopus tropicalis (Western clawed frog) | adult skeletal muscle MyH       |
| <b>16</b> | Q4T2B5           | Tetraodon nigroviridis                   | hypothetical protein            |
| <b>17</b> | Q6DFQ6           | Xenopus tropicalis (Western clawed frog) | extrocular skeletal muscle MyH  |
| <b>18</b> | B4F6Y1           | Xenopus tropicalis (Western clawed frog) | hypothetical protein            |
| <b>19</b> | UPI00006A2578    | Xenopus tropicalis (Western clawed frog) | extraocular skeletal muscle MyH |
| <b>20</b> | A6QPA6           | Bos taurus (cattle)                      | embryonic skeletal muscle MyH   |
| <b>21</b> | Q076A8           | Canis lupus (dog)                        | embryonic skeletal muscle MyH   |
| <b>22</b> | UPI0000D9E164    | Macaca mulatta (Rhesus macaque)          | embryonic skeletal muscle MyH   |
| <b>23</b> | Q75UE1           | Lampetra japonica (lamprey)              | unspecified MyH                 |
| <b>24</b> | UPI0000E81268    | Gallus gallus (chicken)                  | extraocular skeletal muscle MyH |



|           | <b>Accession</b> | <b>Species</b>                            | <b>Description</b>              |
|-----------|------------------|-------------------------------------------|---------------------------------|
| <b>25</b> | Q90339           | Cyprinus carpio (common carp)             | fast muscle MyH                 |
| <b>26</b> | Q6NX33           | Xenopus tropicalis (Western clawed frog)  | unspecified MyH                 |
| <b>27</b> | UPI0000D9E163    | Macaca mulatta (Rhesus macaque)           | embryonic skeletal muscle MyH   |
| <b>28</b> | A8R0Q4           | Hypophthalmichthys molitrix (silver carp) | fast muscle MyH                 |
| <b>29</b> | UPI00015A3FB7    | Danio rerio (zebrafish)                   | fast muscle MyH                 |
| <b>30</b> | UPI0001761474    | Danio rerio (zebrafish)                   | fast muscle MyH                 |
| <b>31</b> | B1AR69           | Mus musculus (mouse)                      | extraocular skeletal muscle MyH |
| <b>32</b> | UPI00015A3FF2    | Danio rerio (zebrafish)                   | skeletal muscle MyH             |
| <b>33</b> | UPI0000D9E161    | Macaca mulatta (Rhesus macaque)           | extraocular skeletal muscle MyH |
| <b>34</b> | Q9GJP9           | Oryctolagus cuniculus (rabbit)            | extraocular skeletal muscle MyH |
| <b>35</b> | UPI0000DA3582    | Rattus norvegicus (rat)                   | extraocular skeletal muscle MyH |
| <b>36</b> | B8A569           | Danio rerio (zebrafish)                   | unspecified MyH                 |
| <b>37</b> | Q05K05           | Oryzias latipes (Japanese rice fish)      | smooth muscle MyH               |
| <b>38</b> | UPI00015A7E7F    | Danio rerio (zebrafish)                   | fast muscle MyH                 |
| <b>39</b> | Q9UKX3           | Homo sapiens (human)                      | extraocular skeletal muscle MyH |
| <b>40</b> | Q508P7           | Danio rerio (zebrafish)                   | fast muscle MyH                 |
| <b>41</b> | B8A561           | Danio rerio (zebrafish)                   | unspecified MyH                 |
| <b>42</b> | UPI000175F75C    | Danio rerio (zebrafish)                   | skeletal muscle MyH             |
| <b>43</b> | O42352           | Cyprinus carpio (common carp)             | unspecified MyH                 |
| <b>44</b> | UPI00015A7E8A    | Danio rerio (zebrafish)                   | fast muscle MyH                 |
| <b>45</b> | Q2HX58           | Cyprinus carpio (common carp)             | embryonic muscle MyH            |
| <b>46</b> | A4GWV4           | Siniperca kneri (Chinese perch)           | skeletal muscle MyH             |
| <b>47</b> | UPI0000EBDD42    | Bos taurus (cattle)                       | extraocular skeletal muscle MyH |
| <b>48</b> | UPI0000DA33E7    | Rattus norvegicus (rat)                   | extraocular skeletal muscle MyH |

|           | <b>Accession</b> | <b>Species</b>                              | <b>Description</b>              |
|-----------|------------------|---------------------------------------------|---------------------------------|
| <b>49</b> | Q6SNT2           | Siniperca chuatsi (Chinese perch)           | fast muscle MyH                 |
| <b>50</b> | Q05K10           | Oryzias latipes (Japanese rice fish)        | fast muscle MyH                 |
| <b>51</b> | Q90YF6           | Paracirrhites forsteri (freckled hawkfish)  | unspecified MyH                 |
| <b>52</b> | UPI0001796E5B    | Equus caballus (horse)                      | extraocular skeletal muscle MyH |
| <b>53</b> | Q90337           | Cyprinus carpio (common carp)               | unspecified MyH                 |
| <b>54</b> | Q5NTZ3           | Cyprinus carpio (common carp)               | unspecified MyH                 |
| <b>55</b> | Q05K07           | Oryzias latipes (Japanese rice fish)        | fast muscle MyH                 |
| <b>56</b> | Q98TQ4           | Notothenia coriiceps (black rockcod)        | unspecified MyH                 |
| <b>57</b> | Q05K11           | Oryzias latipes (Japanese rice fish)        | fast muscle MyH                 |
| <b>58</b> | A4PDX4           | Saurida undosquamis (brushtooth lizardfish) | fast muscle MyH                 |
| <b>59</b> | Q9DGD5           | Pennahia argentata (silver croaker)         | unspecified MyH                 |
| <b>60</b> | B2Z9Y7           | Xenopus laevis (African clawed frog)        | laryngeal skeletal muscle MyH   |
| <b>61</b> | A8R0Q7           | Hypophthalmichthys molitrix (silver carp)   | fast muscle MyH                 |
| <b>62</b> | Q98TQ6           | Notothenia coriiceps (black rockcod)        | unspecified MyH                 |
| <b>63</b> | Q8JIP5           | Oncorhynchus keta (chum salmon)             | unspecified MyH                 |
| <b>64</b> | UPI000180BC7B    | Ciona intestinalis (sea squirt)             | embryonic muscle MyH            |
| <b>65</b> | Q25142           | Halocynthia roretzi (sea pineapple)         | embryonic muscle MyH            |
| <b>66</b> | B2RFJ0           | Oikopleura dioica                           | embryonic muscle MyH            |
| <b>67</b> | UPI0000E47670    | Strongylocentrotus purpuratus (sea urchin)  | unspecified MyH                 |
| <b>68</b> | B1PS43           | Homo sapiens (human)                        | smooth muscle MyH               |

**Table S4. List of Sequences in the MYBPC3 Alignment**

This table shows the 50 sequences chosen for the MYBPC3 alignment and the UniProt or UniParc accessions used to refer to them in figure S2, ordered by sequence similarity to human MYBPC3. “MyBP-C” in the description column indicates myosin binding protein C.

|           | <b>Accession</b> | <b>Species</b>                           | <b>Description</b>   |
|-----------|------------------|------------------------------------------|----------------------|
| <b>1</b>  | A8MXZ9           | Homo sapiens (human)                     | cardiac MyBP-C       |
| <b>2</b>  | Q2Q1P6           | Canis lupus (dog)                        | cardiac MyBP-C       |
| <b>3</b>  | UPI0001796E3C    | Equus caballus (horse)                   | cardiac MyBP-C       |
| <b>4</b>  | UPI0000EB1703    | Canis lupus (dog)                        | cardiac MyBP-C       |
| <b>5</b>  | A2AGQ1           | Mus musculus (mouse)                     | cardiac MyBP-C       |
| <b>6</b>  | B2FDF4           | Mus musculus (mouse)                     | cardiac MyBP-C       |
| <b>7</b>  | A9JR55           | Mus musculus (mouse)                     | cardiac MyBP-C       |
| <b>8</b>  | Q3UIK0           | Mus musculus (mouse)                     | cardiac MyBP-C       |
| <b>9</b>  | Q0VD56           | Bos taurus (cattle)                      | cardiac MyBP-C       |
| <b>10</b> | UPI000179E0E8    | Bos taurus (cattle)                      | cardiac MyBP-C       |
| <b>11</b> | UPI0000DC0477    | Rattus norvegicus (rat)                  | cardiac MyBP-C       |
| <b>12</b> | UPI000154D9A3    | Rattus norvegicus (rat)                  | cardiac MyBP-C       |
| <b>13</b> | O70468           | Mus musculus (mouse)                     | cardiac MyBP-C       |
| <b>14</b> | UPI0000F2DAC3    | Monodelphis domestica (opossum)          | hypothetical protein |
| <b>15</b> | UPI0000ECB979    | Gallus gallus (chicken)                  | cardiac MyBP-C       |
| <b>16</b> | Q90688           | Gallus gallus (chicken)                  | cardiac MyBP-C       |
| <b>17</b> | UPI0000ECB97A    | Gallus gallus (chicken)                  | cardiac MyBP-C       |
| <b>18</b> | Q90688-2         | Gallus gallus (chicken)                  | cardiac MyBP-C       |
| <b>19</b> | B7ZS41           | Xenopus laevis (African clawed frog)     | hypothetical protein |
| <b>20</b> | Q6IP30           | Xenopus laevis (African clawed frog)     | hypothetical protein |
| <b>21</b> | UPI00006A19A0    | Xenopus tropicalis (Western clawed frog) | cardiac MyBP-C       |
| <b>22</b> | Q90X86           | Xenopus laevis (African clawed frog)     | cardiac MyBP-C       |
| <b>23</b> | Q498L6           | Xenopus laevis (African clawed frog)     | hypothetical protein |
| <b>24</b> | UPI0001722DB9    | Danio rerio (zebrafish)                  | cardiac MyBP-C       |

|           | <b>Accession</b> | <b>Species</b>                           | <b>Description</b>   |
|-----------|------------------|------------------------------------------|----------------------|
| <b>25</b> | A9JTS4           | Xenopus tropicalis (Western clawed frog) | cardiac MyBP-C       |
| <b>26</b> | UPI00015A7ACC    | Danio rerio (zebrafish)                  | hypothetical protein |
| <b>27</b> | UPI00015A7ACB    | Danio rerio (zebrafish)                  | hypothetical protein |
| <b>28</b> | Q4SI34           | Tetraodon nigroviridis (pufferfish)      | hypothetical protein |
| <b>29</b> | UPI00015A7ACA    | Danio rerio (zebrafish)                  | hypothetical protein |
| <b>30</b> | Q0IJ38           | Danio rerio (zebrafish)                  | fast MyBP-C          |
| <b>31</b> | UPI00015A7A35    | Danio rerio (zebrafish)                  | hypothetical protein |
| <b>32</b> | UPI00015A7A37    | Danio rerio (zebrafish)                  | hypothetical protein |
| <b>33</b> | UPI0000D8BC93    | Danio rerio (zebrafish)                  | hypothetical protein |
| <b>34</b> | P16419           | Gallus gallus (chicken)                  | fast MyBP-C          |
| <b>35</b> | Q4T9D9           | Tetraodon nigroviridis (pufferfish)      | hypothetical protein |
| <b>36</b> | Q5BJ14           | Danio rerio (zebrafish)                  | fast MyBP-C          |
| <b>37</b> | UPI00015A4C30    | Danio rerio (zebrafish)                  | hypothetical protein |
| <b>38</b> | UPI00015A4C2E    | Danio rerio (zebrafish)                  | hypothetical protein |
| <b>39</b> | UPI000059FDA5    | Canis lupus (dog)                        | fast MyBP-C          |
| <b>40</b> | UPI000059FDA7    | Canis lupus (dog)                        | fast MyBP-C          |
| <b>41</b> | UPI00015A4C4C    | Danio rerio (zebrafish)                  | hypothetical protein |
| <b>42</b> | UPI00015A4C31    | Danio rerio (zebrafish)                  | hypothetical protein |
| <b>43</b> | UPI0000EB459A    | Canis lupus (dog)                        | fast MyBP-C          |
| <b>44</b> | UPI000154F1E6    | Rattus norvegicus (rat)                  | fast MyBP-C          |
| <b>45</b> | A1L4G9           | Homo sapiens (human)                     | fast MyBP-C          |
| <b>46</b> | Q14324           | Homo sapiens (human)                     | fast MyBP-C          |
| <b>47</b> | UPI0000D617F3    | Homo sapiens (human)                     | fast MyBP-C          |
| <b>48</b> | Q5XKE0           | Mus musculus (mouse)                     | fast MyBP-C          |

|           | <b>Accession</b> | <b>Species</b>                           | <b>Description</b> |
|-----------|------------------|------------------------------------------|--------------------|
| <b>49</b> | UPI00015DF070    | Mus musculus (mouse)                     | fast MyBP-C        |
| <b>50</b> | UPI00006A07B4    | Xenopus tropicalis (Western clawed frog) | fast MyBP-C        |

**Table S5. Pairwise Distances between Sequences in the MYH7 Alignment**

This table shows the pairwise alignment distances between sequences in the manual MYH7 alignment. Sequences are ordered and numbered as in table S2.

|    | 1    | 2    | 3    | 4    | 5    | 6    | 7    | 8    | 9    | 10   | 11   | 12   | 13   | 14   | 15   | 16   | 17   |
|----|------|------|------|------|------|------|------|------|------|------|------|------|------|------|------|------|------|
| 1  | 1.00 | 0.93 | 0.89 | 0.88 | 0.88 | 0.87 | 0.86 | 0.86 | 0.86 | 0.86 | 0.85 | 0.83 | 0.82 | 0.81 | 0.80 | 0.80 | 0.80 |
| 2  | 0.93 | 1.00 | 0.90 | 0.90 | 0.89 | 0.86 | 0.86 | 0.86 | 0.86 | 0.86 | 0.85 | 0.83 | 0.81 | 0.81 | 0.82 | 0.80 | 0.80 |
| 3  | 0.89 | 0.90 | 1.00 | 0.98 | 0.86 | 0.83 | 0.83 | 0.83 | 0.83 | 0.84 | 0.83 | 0.81 | 0.79 | 0.79 | 0.79 | 0.79 | 0.78 |
| 4  | 0.88 | 0.90 | 0.98 | 1.00 | 0.86 | 0.83 | 0.83 | 0.83 | 0.83 | 0.84 | 0.83 | 0.81 | 0.79 | 0.79 | 0.79 | 0.79 | 0.78 |
| 5  | 0.88 | 0.89 | 0.86 | 0.86 | 1.00 | 0.85 | 0.86 | 0.85 | 0.85 | 0.85 | 0.84 | 0.83 | 0.79 | 0.79 | 0.80 | 0.80 | 0.79 |
| 6  | 0.87 | 0.86 | 0.83 | 0.83 | 0.85 | 1.00 | 0.90 | 0.97 | 0.90 | 0.93 | 0.92 | 0.83 | 0.80 | 0.80 | 0.80 | 0.80 | 0.80 |
| 7  | 0.86 | 0.86 | 0.83 | 0.83 | 0.86 | 0.90 | 1.00 | 0.90 | 1.00 | 0.89 | 0.88 | 0.83 | 0.80 | 0.79 | 0.80 | 0.80 | 0.80 |
| 8  | 0.86 | 0.86 | 0.83 | 0.83 | 0.85 | 0.97 | 0.90 | 1.00 | 0.90 | 0.95 | 0.92 | 0.83 | 0.80 | 0.80 | 0.80 | 0.80 | 0.80 |
| 9  | 0.86 | 0.86 | 0.83 | 0.83 | 0.85 | 0.90 | 1.00 | 0.90 | 1.00 | 0.89 | 0.87 | 0.83 | 0.79 | 0.79 | 0.79 | 0.80 | 0.80 |
| 10 | 0.86 | 0.86 | 0.84 | 0.84 | 0.85 | 0.93 | 0.89 | 0.95 | 0.89 | 1.00 | 0.95 | 0.84 | 0.79 | 0.79 | 0.80 | 0.80 | 0.80 |
| 11 | 0.85 | 0.85 | 0.83 | 0.83 | 0.84 | 0.92 | 0.88 | 0.92 | 0.87 | 0.95 | 1.00 | 0.83 | 0.80 | 0.79 | 0.80 | 0.80 | 0.80 |
| 12 | 0.83 | 0.83 | 0.81 | 0.81 | 0.83 | 0.83 | 0.83 | 0.83 | 0.83 | 0.84 | 0.83 | 1.00 | 0.77 | 0.77 | 0.78 | 0.84 | 0.78 |
| 13 | 0.82 | 0.81 | 0.79 | 0.79 | 0.79 | 0.80 | 0.80 | 0.80 | 0.79 | 0.79 | 0.80 | 0.77 | 1.00 | 0.94 | 0.88 | 0.74 | 0.84 |
| 14 | 0.81 | 0.81 | 0.79 | 0.79 | 0.79 | 0.80 | 0.79 | 0.80 | 0.79 | 0.79 | 0.79 | 0.77 | 0.94 | 1.00 | 0.87 | 0.74 | 0.84 |
| 15 | 0.80 | 0.82 | 0.79 | 0.79 | 0.80 | 0.80 | 0.80 | 0.80 | 0.79 | 0.80 | 0.80 | 0.78 | 0.88 | 0.87 | 1.00 | 0.75 | 0.86 |
| 16 | 0.80 | 0.80 | 0.79 | 0.79 | 0.80 | 0.80 | 0.80 | 0.80 | 0.80 | 0.80 | 0.80 | 0.84 | 0.74 | 0.74 | 0.75 | 1.00 | 0.77 |
| 17 | 0.80 | 0.80 | 0.78 | 0.78 | 0.79 | 0.80 | 0.80 | 0.80 | 0.80 | 0.80 | 0.80 | 0.78 | 0.84 | 0.84 | 0.86 | 0.77 | 1.00 |
| 18 | 0.80 | 0.81 | 0.78 | 0.78 | 0.80 | 0.80 | 0.79 | 0.80 | 0.79 | 0.80 | 0.80 | 0.78 | 0.86 | 0.86 | 0.90 | 0.75 | 0.86 |
| 19 | 0.80 | 0.80 | 0.78 | 0.78 | 0.79 | 0.80 | 0.80 | 0.79 | 0.80 | 0.79 | 0.80 | 0.77 | 0.83 | 0.83 | 0.85 | 0.76 | 0.99 |
| 20 | 0.79 | 0.80 | 0.78 | 0.78 | 0.78 | 0.79 | 0.78 | 0.79 | 0.78 | 0.78 | 0.79 | 0.76 | 0.85 | 0.85 | 0.83 | 0.74 | 0.83 |
| 21 | 0.79 | 0.80 | 0.78 | 0.78 | 0.78 | 0.79 | 0.78 | 0.79 | 0.78 | 0.79 | 0.79 | 0.76 | 0.86 | 0.85 | 0.84 | 0.74 | 0.83 |
| 22 | 0.79 | 0.80 | 0.78 | 0.78 | 0.78 | 0.79 | 0.78 | 0.79 | 0.78 | 0.78 | 0.79 | 0.76 | 0.86 | 0.85 | 0.83 | 0.73 | 0.83 |
| 23 | 0.79 | 0.79 | 0.78 | 0.77 | 0.79 | 0.78 | 0.78 | 0.78 | 0.78 | 0.79 | 0.79 | 0.77 | 0.79 | 0.78 | 0.81 | 0.76 | 0.80 |
| 24 | 0.79 | 0.79 | 0.77 | 0.77 | 0.78 | 0.78 | 0.78 | 0.78 | 0.78 | 0.79 | 0.79 | 0.77 | 0.84 | 0.84 | 0.85 | 0.74 | 0.83 |



|    | 1    | 2    | 3    | 4    | 5    | 6    | 7    | 8    | 9    | 10   | 11   | 12   | 13   | 14   | 15   | 16   | 17   |
|----|------|------|------|------|------|------|------|------|------|------|------|------|------|------|------|------|------|
| 25 | 0.79 | 0.79 | 0.76 | 0.76 | 0.77 | 0.79 | 0.78 | 0.79 | 0.78 | 0.80 | 0.79 | 0.76 | 0.83 | 0.82 | 0.84 | 0.74 | 0.83 |
| 26 | 0.78 | 0.80 | 0.77 | 0.77 | 0.79 | 0.79 | 0.79 | 0.78 | 0.78 | 0.79 | 0.79 | 0.77 | 0.83 | 0.82 | 0.84 | 0.75 | 0.91 |
| 27 | 0.78 | 0.79 | 0.77 | 0.76 | 0.77 | 0.78 | 0.77 | 0.78 | 0.77 | 0.77 | 0.78 | 0.75 | 0.84 | 0.84 | 0.82 | 0.73 | 0.82 |
| 28 | 0.78 | 0.78 | 0.76 | 0.76 | 0.77 | 0.79 | 0.78 | 0.79 | 0.78 | 0.79 | 0.79 | 0.76 | 0.83 | 0.82 | 0.83 | 0.73 | 0.82 |
| 29 | 0.78 | 0.78 | 0.76 | 0.76 | 0.77 | 0.79 | 0.78 | 0.79 | 0.78 | 0.79 | 0.79 | 0.76 | 0.83 | 0.82 | 0.84 | 0.74 | 0.83 |
| 30 | 0.78 | 0.78 | 0.76 | 0.76 | 0.77 | 0.79 | 0.78 | 0.79 | 0.78 | 0.79 | 0.79 | 0.76 | 0.83 | 0.82 | 0.84 | 0.74 | 0.83 |
| 31 | 0.78 | 0.78 | 0.76 | 0.76 | 0.77 | 0.77 | 0.77 | 0.76 | 0.77 | 0.77 | 0.77 | 0.75 | 0.83 | 0.83 | 0.82 | 0.73 | 0.82 |
| 32 | 0.78 | 0.78 | 0.76 | 0.76 | 0.77 | 0.79 | 0.78 | 0.79 | 0.78 | 0.79 | 0.79 | 0.76 | 0.83 | 0.82 | 0.84 | 0.74 | 0.83 |
| 33 | 0.78 | 0.78 | 0.76 | 0.76 | 0.77 | 0.76 | 0.77 | 0.76 | 0.77 | 0.76 | 0.77 | 0.75 | 0.82 | 0.83 | 0.82 | 0.72 | 0.81 |
| 34 | 0.78 | 0.78 | 0.76 | 0.76 | 0.77 | 0.76 | 0.77 | 0.76 | 0.77 | 0.76 | 0.77 | 0.75 | 0.83 | 0.83 | 0.82 | 0.73 | 0.82 |
| 35 | 0.78 | 0.78 | 0.76 | 0.76 | 0.77 | 0.77 | 0.77 | 0.76 | 0.77 | 0.76 | 0.77 | 0.75 | 0.83 | 0.83 | 0.82 | 0.73 | 0.82 |
| 36 | 0.78 | 0.78 | 0.76 | 0.76 | 0.77 | 0.78 | 0.78 | 0.78 | 0.78 | 0.79 | 0.79 | 0.76 | 0.82 | 0.82 | 0.83 | 0.74 | 0.83 |
| 37 | 0.78 | 0.78 | 0.76 | 0.76 | 0.77 | 0.78 | 0.78 | 0.79 | 0.78 | 0.79 | 0.79 | 0.76 | 0.83 | 0.81 | 0.83 | 0.74 | 0.83 |
| 38 | 0.77 | 0.78 | 0.76 | 0.76 | 0.77 | 0.78 | 0.78 | 0.78 | 0.78 | 0.79 | 0.79 | 0.76 | 0.82 | 0.82 | 0.83 | 0.74 | 0.83 |
| 39 | 0.77 | 0.77 | 0.76 | 0.76 | 0.76 | 0.76 | 0.77 | 0.76 | 0.76 | 0.76 | 0.77 | 0.74 | 0.82 | 0.82 | 0.82 | 0.72 | 0.81 |
| 40 | 0.77 | 0.78 | 0.76 | 0.76 | 0.77 | 0.78 | 0.78 | 0.78 | 0.78 | 0.79 | 0.79 | 0.76 | 0.82 | 0.82 | 0.83 | 0.74 | 0.83 |
| 41 | 0.77 | 0.78 | 0.76 | 0.76 | 0.77 | 0.78 | 0.78 | 0.79 | 0.78 | 0.79 | 0.79 | 0.76 | 0.82 | 0.82 | 0.83 | 0.74 | 0.83 |
| 42 | 0.77 | 0.78 | 0.76 | 0.76 | 0.77 | 0.78 | 0.78 | 0.78 | 0.78 | 0.79 | 0.79 | 0.76 | 0.82 | 0.82 | 0.83 | 0.74 | 0.83 |
| 43 | 0.77 | 0.77 | 0.74 | 0.75 | 0.76 | 0.77 | 0.77 | 0.78 | 0.77 | 0.78 | 0.78 | 0.74 | 0.81 | 0.80 | 0.83 | 0.73 | 0.82 |
| 44 | 0.77 | 0.78 | 0.75 | 0.75 | 0.77 | 0.78 | 0.77 | 0.78 | 0.77 | 0.78 | 0.78 | 0.76 | 0.82 | 0.81 | 0.83 | 0.74 | 0.83 |
| 45 | 0.77 | 0.78 | 0.76 | 0.75 | 0.77 | 0.78 | 0.78 | 0.78 | 0.77 | 0.79 | 0.79 | 0.75 | 0.82 | 0.82 | 0.83 | 0.74 | 0.83 |
| 46 | 0.77 | 0.77 | 0.75 | 0.75 | 0.76 | 0.78 | 0.77 | 0.78 | 0.77 | 0.78 | 0.78 | 0.75 | 0.81 | 0.81 | 0.82 | 0.73 | 0.82 |
| 47 | 0.77 | 0.77 | 0.76 | 0.76 | 0.76 | 0.76 | 0.77 | 0.76 | 0.76 | 0.76 | 0.76 | 0.74 | 0.82 | 0.82 | 0.81 | 0.72 | 0.81 |
| 48 | 0.77 | 0.77 | 0.76 | 0.76 | 0.77 | 0.76 | 0.77 | 0.76 | 0.77 | 0.76 | 0.77 | 0.74 | 0.82 | 0.82 | 0.82 | 0.72 | 0.81 |

|    | 1    | 2    | 3    | 4    | 5    | 6    | 7    | 8    | 9    | 10   | 11   | 12   | 13   | 14   | 15   | 16   | 17   |
|----|------|------|------|------|------|------|------|------|------|------|------|------|------|------|------|------|------|
| 49 | 0.77 | 0.77 | 0.75 | 0.75 | 0.76 | 0.78 | 0.77 | 0.78 | 0.77 | 0.78 | 0.78 | 0.75 | 0.81 | 0.81 | 0.82 | 0.73 | 0.82 |
| 50 | 0.77 | 0.77 | 0.75 | 0.75 | 0.77 | 0.78 | 0.78 | 0.78 | 0.77 | 0.79 | 0.79 | 0.75 | 0.82 | 0.81 | 0.83 | 0.73 | 0.81 |
| 51 | 0.77 | 0.77 | 0.75 | 0.75 | 0.76 | 0.78 | 0.77 | 0.78 | 0.77 | 0.79 | 0.79 | 0.76 | 0.82 | 0.81 | 0.83 | 0.73 | 0.82 |
| 52 | 0.77 | 0.77 | 0.76 | 0.75 | 0.76 | 0.76 | 0.77 | 0.75 | 0.76 | 0.76 | 0.76 | 0.74 | 0.82 | 0.82 | 0.82 | 0.72 | 0.81 |
| 53 | 0.77 | 0.77 | 0.74 | 0.74 | 0.76 | 0.77 | 0.77 | 0.78 | 0.77 | 0.78 | 0.78 | 0.74 | 0.81 | 0.80 | 0.82 | 0.73 | 0.81 |
| 54 | 0.77 | 0.77 | 0.74 | 0.74 | 0.76 | 0.77 | 0.77 | 0.77 | 0.77 | 0.77 | 0.77 | 0.74 | 0.81 | 0.80 | 0.82 | 0.72 | 0.81 |
| 55 | 0.77 | 0.77 | 0.75 | 0.75 | 0.76 | 0.78 | 0.77 | 0.78 | 0.77 | 0.79 | 0.79 | 0.75 | 0.82 | 0.80 | 0.83 | 0.73 | 0.82 |
| 56 | 0.77 | 0.77 | 0.75 | 0.75 | 0.76 | 0.77 | 0.77 | 0.77 | 0.76 | 0.77 | 0.77 | 0.75 | 0.81 | 0.80 | 0.82 | 0.72 | 0.80 |
| 57 | 0.77 | 0.77 | 0.75 | 0.75 | 0.76 | 0.78 | 0.77 | 0.78 | 0.77 | 0.78 | 0.78 | 0.75 | 0.81 | 0.80 | 0.83 | 0.73 | 0.82 |
| 58 | 0.76 | 0.77 | 0.74 | 0.74 | 0.76 | 0.77 | 0.77 | 0.78 | 0.77 | 0.78 | 0.78 | 0.75 | 0.81 | 0.80 | 0.82 | 0.73 | 0.82 |
| 59 | 0.76 | 0.77 | 0.74 | 0.74 | 0.76 | 0.77 | 0.77 | 0.77 | 0.77 | 0.78 | 0.78 | 0.75 | 0.81 | 0.80 | 0.82 | 0.73 | 0.82 |
| 60 | 0.76 | 0.76 | 0.75 | 0.74 | 0.75 | 0.76 | 0.76 | 0.75 | 0.76 | 0.76 | 0.76 | 0.74 | 0.78 | 0.78 | 0.80 | 0.72 | 0.84 |
| 61 | 0.75 | 0.76 | 0.74 | 0.73 | 0.75 | 0.76 | 0.76 | 0.76 | 0.76 | 0.77 | 0.77 | 0.74 | 0.81 | 0.80 | 0.81 | 0.72 | 0.80 |
| 62 | 0.75 | 0.76 | 0.73 | 0.73 | 0.75 | 0.76 | 0.76 | 0.77 | 0.76 | 0.77 | 0.77 | 0.74 | 0.79 | 0.79 | 0.81 | 0.72 | 0.80 |
| 63 | 0.75 | 0.75 | 0.73 | 0.73 | 0.74 | 0.75 | 0.75 | 0.76 | 0.75 | 0.76 | 0.76 | 0.73 | 0.79 | 0.78 | 0.80 | 0.72 | 0.80 |
| 64 | 0.69 | 0.71 | 0.67 | 0.67 | 0.69 | 0.69 | 0.69 | 0.69 | 0.69 | 0.69 | 0.69 | 0.67 | 0.69 | 0.67 | 0.68 | 0.67 | 0.69 |
| 65 | 0.69 | 0.71 | 0.67 | 0.68 | 0.69 | 0.70 | 0.69 | 0.70 | 0.69 | 0.70 | 0.70 | 0.68 | 0.68 | 0.67 | 0.68 | 0.67 | 0.69 |
| 66 | 0.56 | 0.57 | 0.56 | 0.56 | 0.55 | 0.56 | 0.55 | 0.56 | 0.55 | 0.56 | 0.56 | 0.56 | 0.56 | 0.55 | 0.56 | 0.55 | 0.57 |
| 67 | 0.55 | 0.55 | 0.54 | 0.54 | 0.54 | 0.55 | 0.54 | 0.55 | 0.54 | 0.55 | 0.54 | 0.54 | 0.54 | 0.53 | 0.54 | 0.54 | 0.54 |
| 68 | 0.42 | 0.40 | 0.41 | 0.41 | 0.41 | 0.41 | 0.41 | 0.41 | 0.41 | 0.41 | 0.40 | 0.40 | 0.42 | 0.41 | 0.41 | 0.41 | 0.41 |

|    | 18   | 19   | 20   | 21   | 22   | 23   | 24   | 25   | 26   | 27   | 28   | 29   | 30   | 31   | 32   | 33   | 34   |
|----|------|------|------|------|------|------|------|------|------|------|------|------|------|------|------|------|------|
| 1  | 0.80 | 0.80 | 0.79 | 0.79 | 0.79 | 0.79 | 0.79 | 0.79 | 0.78 | 0.78 | 0.78 | 0.78 | 0.78 | 0.78 | 0.78 | 0.78 | 0.78 |
| 2  | 0.81 | 0.80 | 0.80 | 0.80 | 0.80 | 0.79 | 0.79 | 0.79 | 0.80 | 0.79 | 0.78 | 0.78 | 0.78 | 0.78 | 0.78 | 0.78 | 0.78 |
| 3  | 0.78 | 0.78 | 0.78 | 0.78 | 0.78 | 0.78 | 0.77 | 0.76 | 0.77 | 0.77 | 0.76 | 0.76 | 0.76 | 0.76 | 0.76 | 0.76 | 0.76 |
| 4  | 0.78 | 0.78 | 0.78 | 0.78 | 0.78 | 0.77 | 0.77 | 0.76 | 0.77 | 0.76 | 0.76 | 0.76 | 0.76 | 0.76 | 0.76 | 0.76 | 0.76 |
| 5  | 0.80 | 0.79 | 0.78 | 0.78 | 0.78 | 0.79 | 0.78 | 0.77 | 0.79 | 0.77 | 0.77 | 0.77 | 0.77 | 0.77 | 0.77 | 0.77 | 0.77 |
| 6  | 0.80 | 0.80 | 0.79 | 0.79 | 0.79 | 0.78 | 0.78 | 0.79 | 0.79 | 0.78 | 0.79 | 0.79 | 0.79 | 0.77 | 0.79 | 0.76 | 0.76 |
| 7  | 0.79 | 0.80 | 0.78 | 0.78 | 0.78 | 0.78 | 0.78 | 0.78 | 0.79 | 0.77 | 0.78 | 0.78 | 0.78 | 0.77 | 0.78 | 0.77 | 0.77 |
| 8  | 0.80 | 0.79 | 0.79 | 0.79 | 0.79 | 0.78 | 0.78 | 0.79 | 0.78 | 0.78 | 0.79 | 0.79 | 0.79 | 0.76 | 0.79 | 0.76 | 0.76 |
| 9  | 0.79 | 0.80 | 0.78 | 0.78 | 0.78 | 0.78 | 0.78 | 0.78 | 0.78 | 0.77 | 0.78 | 0.78 | 0.78 | 0.77 | 0.78 | 0.77 | 0.77 |
| 10 | 0.80 | 0.79 | 0.78 | 0.79 | 0.78 | 0.79 | 0.79 | 0.80 | 0.79 | 0.77 | 0.79 | 0.79 | 0.79 | 0.77 | 0.79 | 0.76 | 0.76 |
| 11 | 0.80 | 0.80 | 0.79 | 0.79 | 0.79 | 0.79 | 0.79 | 0.79 | 0.79 | 0.78 | 0.79 | 0.79 | 0.79 | 0.77 | 0.79 | 0.77 | 0.77 |
| 12 | 0.78 | 0.77 | 0.76 | 0.76 | 0.76 | 0.77 | 0.77 | 0.76 | 0.77 | 0.75 | 0.76 | 0.76 | 0.76 | 0.75 | 0.76 | 0.75 | 0.75 |
| 13 | 0.86 | 0.83 | 0.85 | 0.86 | 0.86 | 0.79 | 0.84 | 0.83 | 0.83 | 0.84 | 0.83 | 0.83 | 0.83 | 0.83 | 0.83 | 0.82 | 0.83 |
| 14 | 0.86 | 0.83 | 0.85 | 0.85 | 0.85 | 0.78 | 0.84 | 0.82 | 0.82 | 0.84 | 0.82 | 0.82 | 0.82 | 0.83 | 0.82 | 0.83 | 0.83 |
| 15 | 0.90 | 0.85 | 0.83 | 0.84 | 0.83 | 0.81 | 0.85 | 0.84 | 0.84 | 0.82 | 0.83 | 0.84 | 0.84 | 0.82 | 0.84 | 0.82 | 0.82 |
| 16 | 0.75 | 0.76 | 0.74 | 0.74 | 0.73 | 0.76 | 0.74 | 0.74 | 0.75 | 0.73 | 0.73 | 0.74 | 0.74 | 0.73 | 0.74 | 0.72 | 0.73 |
| 17 | 0.86 | 0.99 | 0.83 | 0.83 | 0.83 | 0.80 | 0.83 | 0.83 | 0.91 | 0.82 | 0.82 | 0.83 | 0.83 | 0.82 | 0.83 | 0.81 | 0.82 |
| 18 | 1.00 | 0.85 | 0.82 | 0.83 | 0.83 | 0.80 | 0.87 | 0.85 | 0.86 | 0.82 | 0.84 | 0.85 | 0.85 | 0.84 | 0.85 | 0.83 | 0.83 |
| 19 | 0.85 | 1.00 | 0.82 | 0.82 | 0.82 | 0.79 | 0.82 | 0.83 | 0.90 | 0.81 | 0.82 | 0.83 | 0.83 | 0.81 | 0.83 | 0.81 | 0.81 |
| 20 | 0.82 | 0.82 | 1.00 | 0.98 | 0.97 | 0.78 | 0.81 | 0.80 | 0.82 | 0.97 | 0.80 | 0.80 | 0.80 | 0.80 | 0.80 | 0.79 | 0.79 |
| 21 | 0.83 | 0.82 | 0.98 | 1.00 | 0.98 | 0.79 | 0.81 | 0.81 | 0.81 | 0.98 | 0.81 | 0.81 | 0.80 | 0.80 | 0.80 | 0.80 | 0.80 |
| 22 | 0.83 | 0.82 | 0.97 | 0.98 | 1.00 | 0.78 | 0.81 | 0.81 | 0.81 | 1.00 | 0.81 | 0.80 | 0.80 | 0.80 | 0.80 | 0.79 | 0.79 |
| 23 | 0.80 | 0.79 | 0.78 | 0.79 | 0.78 | 1.00 | 0.78 | 0.79 | 0.79 | 0.77 | 0.78 | 0.78 | 0.78 | 0.77 | 0.79 | 0.77 | 0.77 |
| 24 | 0.87 | 0.82 | 0.81 | 0.81 | 0.81 | 0.78 | 1.00 | 0.82 | 0.82 | 0.80 | 0.80 | 0.82 | 0.82 | 0.85 | 0.82 | 0.85 | 0.85 |

|    | 18   | 19   | 20   | 21   | 22   | 23   | 24   | 25   | 26   | 27   | 28   | 29   | 30   | 31   | 32   | 33   | 34   |
|----|------|------|------|------|------|------|------|------|------|------|------|------|------|------|------|------|------|
| 25 | 0.85 | 0.83 | 0.80 | 0.81 | 0.81 | 0.79 | 0.82 | 1.00 | 0.84 | 0.79 | 0.91 | 0.95 | 0.95 | 0.80 | 0.97 | 0.79 | 0.80 |
| 26 | 0.86 | 0.90 | 0.82 | 0.81 | 0.81 | 0.79 | 0.82 | 0.84 | 1.00 | 0.80 | 0.82 | 0.84 | 0.84 | 0.80 | 0.84 | 0.80 | 0.80 |
| 27 | 0.82 | 0.81 | 0.97 | 0.98 | 1.00 | 0.77 | 0.80 | 0.79 | 0.80 | 1.00 | 0.80 | 0.79 | 0.79 | 0.79 | 0.79 | 0.78 | 0.79 |
| 28 | 0.84 | 0.82 | 0.80 | 0.81 | 0.81 | 0.78 | 0.80 | 0.91 | 0.82 | 0.80 | 1.00 | 0.92 | 0.92 | 0.80 | 0.92 | 0.79 | 0.79 |
| 29 | 0.85 | 0.83 | 0.80 | 0.81 | 0.80 | 0.78 | 0.82 | 0.95 | 0.84 | 0.79 | 0.92 | 1.00 | 1.00 | 0.80 | 0.97 | 0.80 | 0.80 |
| 30 | 0.85 | 0.83 | 0.80 | 0.80 | 0.80 | 0.78 | 0.82 | 0.95 | 0.84 | 0.79 | 0.92 | 1.00 | 1.00 | 0.80 | 0.98 | 0.80 | 0.80 |
| 31 | 0.84 | 0.81 | 0.80 | 0.80 | 0.80 | 0.77 | 0.85 | 0.80 | 0.80 | 0.79 | 0.80 | 0.80 | 0.80 | 1.00 | 0.80 | 0.96 | 0.97 |
| 32 | 0.85 | 0.83 | 0.80 | 0.80 | 0.80 | 0.79 | 0.82 | 0.97 | 0.84 | 0.79 | 0.92 | 0.97 | 0.98 | 0.80 | 1.00 | 0.79 | 0.80 |
| 33 | 0.83 | 0.81 | 0.79 | 0.80 | 0.79 | 0.77 | 0.85 | 0.79 | 0.80 | 0.78 | 0.79 | 0.80 | 0.80 | 0.96 | 0.79 | 1.00 | 0.96 |
| 34 | 0.83 | 0.81 | 0.79 | 0.80 | 0.79 | 0.77 | 0.85 | 0.80 | 0.80 | 0.79 | 0.79 | 0.80 | 0.80 | 0.97 | 0.80 | 0.96 | 1.00 |
| 35 | 0.84 | 0.81 | 0.80 | 0.80 | 0.80 | 0.77 | 0.85 | 0.80 | 0.80 | 0.79 | 0.80 | 0.81 | 0.80 | 0.99 | 0.80 | 0.96 | 0.97 |
| 36 | 0.85 | 0.83 | 0.80 | 0.81 | 0.80 | 0.79 | 0.82 | 0.90 | 0.84 | 0.79 | 0.88 | 0.91 | 0.91 | 0.80 | 0.91 | 0.80 | 0.80 |
| 37 | 0.84 | 0.83 | 0.80 | 0.81 | 0.81 | 0.78 | 0.81 | 0.93 | 0.83 | 0.80 | 0.91 | 0.93 | 0.93 | 0.79 | 0.93 | 0.79 | 0.79 |
| 38 | 0.85 | 0.83 | 0.80 | 0.80 | 0.80 | 0.79 | 0.81 | 0.90 | 0.83 | 0.79 | 0.88 | 0.91 | 0.91 | 0.80 | 0.91 | 0.80 | 0.80 |
| 39 | 0.83 | 0.81 | 0.79 | 0.80 | 0.79 | 0.76 | 0.85 | 0.79 | 0.80 | 0.78 | 0.79 | 0.80 | 0.80 | 0.96 | 0.79 | 0.98 | 0.96 |
| 40 | 0.84 | 0.83 | 0.80 | 0.80 | 0.80 | 0.78 | 0.81 | 0.90 | 0.83 | 0.79 | 0.88 | 0.90 | 0.90 | 0.80 | 0.91 | 0.79 | 0.80 |
| 41 | 0.84 | 0.83 | 0.80 | 0.80 | 0.80 | 0.78 | 0.81 | 0.90 | 0.83 | 0.79 | 0.88 | 0.91 | 0.90 | 0.80 | 0.91 | 0.80 | 0.80 |
| 42 | 0.84 | 0.83 | 0.80 | 0.80 | 0.80 | 0.78 | 0.81 | 0.90 | 0.83 | 0.79 | 0.88 | 0.90 | 0.90 | 0.80 | 0.91 | 0.80 | 0.80 |
| 43 | 0.83 | 0.81 | 0.78 | 0.79 | 0.78 | 0.78 | 0.80 | 0.94 | 0.82 | 0.77 | 0.89 | 0.93 | 0.93 | 0.78 | 0.93 | 0.78 | 0.78 |
| 44 | 0.84 | 0.83 | 0.80 | 0.80 | 0.80 | 0.78 | 0.81 | 0.90 | 0.83 | 0.79 | 0.88 | 0.90 | 0.90 | 0.80 | 0.91 | 0.80 | 0.80 |
| 45 | 0.84 | 0.82 | 0.80 | 0.80 | 0.80 | 0.78 | 0.81 | 0.90 | 0.83 | 0.79 | 0.87 | 0.90 | 0.90 | 0.80 | 0.90 | 0.79 | 0.79 |
| 46 | 0.84 | 0.81 | 0.79 | 0.79 | 0.79 | 0.78 | 0.80 | 0.93 | 0.83 | 0.78 | 0.90 | 0.92 | 0.93 | 0.79 | 0.93 | 0.78 | 0.79 |
| 47 | 0.82 | 0.81 | 0.79 | 0.79 | 0.79 | 0.76 | 0.84 | 0.79 | 0.80 | 0.78 | 0.79 | 0.80 | 0.79 | 0.95 | 0.79 | 0.94 | 0.95 |
| 48 | 0.83 | 0.81 | 0.79 | 0.80 | 0.79 | 0.76 | 0.84 | 0.79 | 0.80 | 0.79 | 0.80 | 0.80 | 0.80 | 0.98 | 0.79 | 0.95 | 0.95 |

|    | 18   | 19   | 20   | 21   | 22   | 23   | 24   | 25   | 26   | 27   | 28   | 29   | 30   | 31   | 32   | 33   | 34   |
|----|------|------|------|------|------|------|------|------|------|------|------|------|------|------|------|------|------|
| 49 | 0.84 | 0.81 | 0.79 | 0.79 | 0.79 | 0.78 | 0.80 | 0.93 | 0.83 | 0.78 | 0.90 | 0.93 | 0.93 | 0.79 | 0.93 | 0.78 | 0.79 |
| 50 | 0.84 | 0.81 | 0.80 | 0.80 | 0.80 | 0.78 | 0.80 | 0.92 | 0.82 | 0.79 | 0.90 | 0.92 | 0.92 | 0.79 | 0.92 | 0.78 | 0.78 |
| 51 | 0.84 | 0.82 | 0.79 | 0.79 | 0.79 | 0.78 | 0.80 | 0.93 | 0.83 | 0.78 | 0.90 | 0.92 | 0.92 | 0.79 | 0.93 | 0.78 | 0.78 |
| 52 | 0.83 | 0.81 | 0.79 | 0.79 | 0.79 | 0.76 | 0.84 | 0.79 | 0.80 | 0.78 | 0.79 | 0.80 | 0.79 | 0.96 | 0.79 | 0.95 | 0.96 |
| 53 | 0.83 | 0.81 | 0.78 | 0.79 | 0.78 | 0.78 | 0.80 | 0.94 | 0.82 | 0.77 | 0.89 | 0.93 | 0.93 | 0.78 | 0.93 | 0.77 | 0.78 |
| 54 | 0.83 | 0.81 | 0.78 | 0.79 | 0.78 | 0.78 | 0.80 | 0.94 | 0.81 | 0.77 | 0.88 | 0.92 | 0.92 | 0.78 | 0.93 | 0.77 | 0.78 |
| 55 | 0.84 | 0.81 | 0.79 | 0.80 | 0.80 | 0.78 | 0.80 | 0.92 | 0.82 | 0.79 | 0.89 | 0.92 | 0.92 | 0.79 | 0.93 | 0.78 | 0.79 |
| 56 | 0.82 | 0.80 | 0.79 | 0.79 | 0.79 | 0.78 | 0.80 | 0.88 | 0.81 | 0.78 | 0.88 | 0.89 | 0.88 | 0.78 | 0.88 | 0.77 | 0.77 |
| 57 | 0.84 | 0.81 | 0.79 | 0.79 | 0.80 | 0.78 | 0.80 | 0.92 | 0.82 | 0.78 | 0.89 | 0.92 | 0.92 | 0.79 | 0.92 | 0.78 | 0.78 |
| 58 | 0.83 | 0.81 | 0.78 | 0.78 | 0.78 | 0.78 | 0.80 | 0.90 | 0.82 | 0.77 | 0.87 | 0.89 | 0.89 | 0.79 | 0.90 | 0.78 | 0.78 |
| 59 | 0.83 | 0.82 | 0.78 | 0.78 | 0.78 | 0.78 | 0.80 | 0.89 | 0.82 | 0.77 | 0.87 | 0.89 | 0.89 | 0.79 | 0.89 | 0.78 | 0.78 |
| 60 | 0.81 | 0.84 | 0.77 | 0.77 | 0.77 | 0.75 | 0.78 | 0.79 | 0.86 | 0.76 | 0.77 | 0.79 | 0.79 | 0.77 | 0.79 | 0.77 | 0.77 |
| 61 | 0.82 | 0.80 | 0.78 | 0.78 | 0.78 | 0.76 | 0.79 | 0.88 | 0.81 | 0.77 | 0.86 | 0.88 | 0.88 | 0.78 | 0.88 | 0.77 | 0.77 |
| 62 | 0.82 | 0.80 | 0.77 | 0.77 | 0.77 | 0.77 | 0.79 | 0.88 | 0.81 | 0.76 | 0.86 | 0.88 | 0.88 | 0.77 | 0.88 | 0.76 | 0.76 |
| 63 | 0.81 | 0.80 | 0.76 | 0.77 | 0.77 | 0.76 | 0.77 | 0.86 | 0.80 | 0.76 | 0.84 | 0.86 | 0.86 | 0.76 | 0.86 | 0.76 | 0.76 |
| 64 | 0.68 | 0.68 | 0.67 | 0.67 | 0.68 | 0.68 | 0.66 | 0.68 | 0.69 | 0.67 | 0.68 | 0.68 | 0.68 | 0.66 | 0.68 | 0.65 | 0.65 |
| 65 | 0.68 | 0.68 | 0.67 | 0.67 | 0.68 | 0.69 | 0.67 | 0.68 | 0.69 | 0.67 | 0.67 | 0.68 | 0.68 | 0.66 | 0.68 | 0.66 | 0.66 |
| 66 | 0.56 | 0.57 | 0.55 | 0.55 | 0.55 | 0.56 | 0.55 | 0.56 | 0.57 | 0.54 | 0.56 | 0.56 | 0.56 | 0.54 | 0.57 | 0.54 | 0.55 |
| 67 | 0.54 | 0.54 | 0.53 | 0.53 | 0.53 | 0.54 | 0.53 | 0.54 | 0.54 | 0.53 | 0.54 | 0.54 | 0.54 | 0.53 | 0.54 | 0.53 | 0.53 |
| 68 | 0.40 | 0.41 | 0.41 | 0.41 | 0.41 | 0.41 | 0.40 | 0.41 | 0.40 | 0.41 | 0.41 | 0.41 | 0.41 | 0.40 | 0.41 | 0.40 | 0.41 |

|    | 35   | 36   | 37   | 38   | 39   | 40   | 41   | 42   | 43   | 44   | 45   | 46   | 47   | 48   | 49   | 50   | 51   |
|----|------|------|------|------|------|------|------|------|------|------|------|------|------|------|------|------|------|
| 1  | 0.78 | 0.78 | 0.78 | 0.77 | 0.77 | 0.77 | 0.77 | 0.77 | 0.77 | 0.77 | 0.77 | 0.77 | 0.77 | 0.77 | 0.77 | 0.77 | 0.77 |
| 2  | 0.78 | 0.78 | 0.78 | 0.78 | 0.77 | 0.78 | 0.78 | 0.78 | 0.77 | 0.78 | 0.78 | 0.77 | 0.77 | 0.77 | 0.77 | 0.77 | 0.77 |
| 3  | 0.76 | 0.76 | 0.76 | 0.76 | 0.76 | 0.76 | 0.76 | 0.76 | 0.74 | 0.75 | 0.76 | 0.75 | 0.76 | 0.76 | 0.75 | 0.75 | 0.75 |
| 4  | 0.76 | 0.76 | 0.76 | 0.76 | 0.76 | 0.76 | 0.76 | 0.76 | 0.75 | 0.75 | 0.75 | 0.75 | 0.76 | 0.76 | 0.75 | 0.75 | 0.75 |
| 5  | 0.77 | 0.77 | 0.77 | 0.77 | 0.76 | 0.77 | 0.77 | 0.77 | 0.76 | 0.77 | 0.77 | 0.76 | 0.76 | 0.77 | 0.76 | 0.77 | 0.76 |
| 6  | 0.77 | 0.78 | 0.78 | 0.78 | 0.76 | 0.78 | 0.78 | 0.78 | 0.77 | 0.78 | 0.78 | 0.78 | 0.76 | 0.76 | 0.78 | 0.78 | 0.78 |
| 7  | 0.77 | 0.78 | 0.78 | 0.78 | 0.77 | 0.78 | 0.78 | 0.78 | 0.77 | 0.77 | 0.78 | 0.77 | 0.77 | 0.77 | 0.77 | 0.78 | 0.77 |
| 8  | 0.76 | 0.78 | 0.79 | 0.78 | 0.76 | 0.78 | 0.79 | 0.78 | 0.78 | 0.78 | 0.78 | 0.78 | 0.76 | 0.76 | 0.78 | 0.78 | 0.78 |
| 9  | 0.77 | 0.78 | 0.78 | 0.78 | 0.76 | 0.78 | 0.78 | 0.78 | 0.77 | 0.77 | 0.77 | 0.77 | 0.76 | 0.77 | 0.77 | 0.77 | 0.77 |
| 10 | 0.76 | 0.79 | 0.79 | 0.79 | 0.76 | 0.79 | 0.79 | 0.79 | 0.78 | 0.78 | 0.79 | 0.78 | 0.76 | 0.76 | 0.78 | 0.79 | 0.79 |
| 11 | 0.77 | 0.79 | 0.79 | 0.79 | 0.77 | 0.79 | 0.79 | 0.79 | 0.78 | 0.78 | 0.79 | 0.78 | 0.76 | 0.77 | 0.78 | 0.79 | 0.79 |
| 12 | 0.75 | 0.76 | 0.76 | 0.76 | 0.74 | 0.76 | 0.76 | 0.76 | 0.74 | 0.76 | 0.75 | 0.75 | 0.74 | 0.74 | 0.75 | 0.75 | 0.76 |
| 13 | 0.83 | 0.82 | 0.83 | 0.82 | 0.82 | 0.82 | 0.82 | 0.82 | 0.81 | 0.82 | 0.82 | 0.81 | 0.82 | 0.82 | 0.81 | 0.82 | 0.82 |
| 14 | 0.83 | 0.82 | 0.81 | 0.82 | 0.82 | 0.82 | 0.82 | 0.82 | 0.80 | 0.81 | 0.82 | 0.81 | 0.82 | 0.82 | 0.81 | 0.81 | 0.81 |
| 15 | 0.82 | 0.83 | 0.83 | 0.83 | 0.82 | 0.83 | 0.83 | 0.83 | 0.83 | 0.83 | 0.83 | 0.82 | 0.81 | 0.82 | 0.82 | 0.83 | 0.83 |
| 16 | 0.73 | 0.74 | 0.74 | 0.74 | 0.72 | 0.74 | 0.74 | 0.74 | 0.73 | 0.74 | 0.74 | 0.73 | 0.72 | 0.72 | 0.73 | 0.73 | 0.73 |
| 17 | 0.82 | 0.83 | 0.83 | 0.83 | 0.81 | 0.83 | 0.83 | 0.83 | 0.82 | 0.83 | 0.83 | 0.82 | 0.81 | 0.81 | 0.82 | 0.81 | 0.82 |
| 18 | 0.84 | 0.85 | 0.84 | 0.85 | 0.83 | 0.84 | 0.84 | 0.84 | 0.83 | 0.84 | 0.84 | 0.84 | 0.82 | 0.83 | 0.84 | 0.84 | 0.84 |
| 19 | 0.81 | 0.83 | 0.83 | 0.83 | 0.81 | 0.83 | 0.83 | 0.83 | 0.81 | 0.83 | 0.82 | 0.81 | 0.81 | 0.81 | 0.81 | 0.81 | 0.82 |
| 20 | 0.80 | 0.80 | 0.80 | 0.80 | 0.79 | 0.80 | 0.80 | 0.80 | 0.78 | 0.80 | 0.80 | 0.79 | 0.79 | 0.79 | 0.79 | 0.80 | 0.79 |
| 21 | 0.80 | 0.81 | 0.81 | 0.80 | 0.80 | 0.80 | 0.80 | 0.80 | 0.79 | 0.80 | 0.80 | 0.79 | 0.79 | 0.80 | 0.79 | 0.80 | 0.79 |
| 22 | 0.80 | 0.80 | 0.81 | 0.80 | 0.79 | 0.80 | 0.80 | 0.80 | 0.78 | 0.80 | 0.80 | 0.79 | 0.79 | 0.79 | 0.79 | 0.80 | 0.79 |
| 23 | 0.77 | 0.79 | 0.78 | 0.79 | 0.76 | 0.78 | 0.78 | 0.78 | 0.78 | 0.78 | 0.78 | 0.78 | 0.76 | 0.76 | 0.78 | 0.78 | 0.78 |
| 24 | 0.85 | 0.82 | 0.81 | 0.81 | 0.85 | 0.81 | 0.81 | 0.81 | 0.80 | 0.81 | 0.81 | 0.80 | 0.84 | 0.84 | 0.80 | 0.80 | 0.80 |

|    | 35   | 36   | 37   | 38   | 39   | 40   | 41   | 42   | 43   | 44   | 45   | 46   | 47   | 48   | 49   | 50   | 51   |
|----|------|------|------|------|------|------|------|------|------|------|------|------|------|------|------|------|------|
| 25 | 0.80 | 0.90 | 0.93 | 0.90 | 0.79 | 0.90 | 0.90 | 0.90 | 0.94 | 0.90 | 0.90 | 0.93 | 0.79 | 0.79 | 0.93 | 0.92 | 0.93 |
| 26 | 0.80 | 0.84 | 0.83 | 0.83 | 0.80 | 0.83 | 0.83 | 0.83 | 0.82 | 0.83 | 0.83 | 0.83 | 0.80 | 0.80 | 0.83 | 0.82 | 0.83 |
| 27 | 0.79 | 0.79 | 0.80 | 0.79 | 0.78 | 0.79 | 0.79 | 0.79 | 0.77 | 0.79 | 0.79 | 0.78 | 0.78 | 0.79 | 0.78 | 0.79 | 0.78 |
| 28 | 0.80 | 0.88 | 0.91 | 0.88 | 0.79 | 0.88 | 0.88 | 0.88 | 0.89 | 0.88 | 0.87 | 0.90 | 0.79 | 0.80 | 0.90 | 0.90 | 0.90 |
| 29 | 0.81 | 0.91 | 0.93 | 0.91 | 0.80 | 0.90 | 0.91 | 0.90 | 0.93 | 0.90 | 0.90 | 0.92 | 0.80 | 0.80 | 0.93 | 0.92 | 0.92 |
| 30 | 0.80 | 0.91 | 0.93 | 0.91 | 0.80 | 0.90 | 0.90 | 0.90 | 0.93 | 0.90 | 0.90 | 0.93 | 0.79 | 0.80 | 0.93 | 0.92 | 0.92 |
| 31 | 0.99 | 0.80 | 0.79 | 0.80 | 0.96 | 0.80 | 0.80 | 0.80 | 0.78 | 0.80 | 0.80 | 0.79 | 0.95 | 0.98 | 0.79 | 0.79 | 0.79 |
| 32 | 0.80 | 0.91 | 0.93 | 0.91 | 0.79 | 0.91 | 0.91 | 0.91 | 0.93 | 0.91 | 0.90 | 0.93 | 0.79 | 0.79 | 0.93 | 0.92 | 0.93 |
| 33 | 0.96 | 0.80 | 0.79 | 0.80 | 0.98 | 0.79 | 0.80 | 0.80 | 0.78 | 0.80 | 0.79 | 0.78 | 0.94 | 0.95 | 0.78 | 0.78 | 0.78 |
| 34 | 0.97 | 0.80 | 0.79 | 0.80 | 0.96 | 0.80 | 0.80 | 0.80 | 0.78 | 0.80 | 0.79 | 0.79 | 0.95 | 0.95 | 0.79 | 0.78 | 0.78 |
| 35 | 1.00 | 0.80 | 0.80 | 0.80 | 0.96 | 0.80 | 0.80 | 0.80 | 0.78 | 0.80 | 0.80 | 0.79 | 0.95 | 0.99 | 0.79 | 0.78 | 0.78 |
| 36 | 0.80 | 1.00 | 0.90 | 0.98 | 0.80 | 0.98 | 0.99 | 0.99 | 0.88 | 0.98 | 0.96 | 0.89 | 0.80 | 0.80 | 0.89 | 0.89 | 0.89 |
| 37 | 0.80 | 0.90 | 1.00 | 0.90 | 0.79 | 0.90 | 0.90 | 0.90 | 0.90 | 0.90 | 0.90 | 0.94 | 0.79 | 0.79 | 0.94 | 0.96 | 0.94 |
| 38 | 0.80 | 0.98 | 0.90 | 1.00 | 0.79 | 0.98 | 0.98 | 0.98 | 0.88 | 0.98 | 0.96 | 0.90 | 0.79 | 0.80 | 0.90 | 0.90 | 0.90 |
| 39 | 0.96 | 0.80 | 0.79 | 0.79 | 1.00 | 0.79 | 0.80 | 0.80 | 0.77 | 0.80 | 0.79 | 0.78 | 0.94 | 0.95 | 0.78 | 0.78 | 0.78 |
| 40 | 0.80 | 0.98 | 0.90 | 0.98 | 0.79 | 1.00 | 0.97 | 0.97 | 0.88 | 0.98 | 0.96 | 0.89 | 0.79 | 0.80 | 0.90 | 0.89 | 0.89 |
| 41 | 0.80 | 0.99 | 0.90 | 0.98 | 0.80 | 0.97 | 1.00 | 1.00 | 0.88 | 0.97 | 0.96 | 0.89 | 0.79 | 0.80 | 0.89 | 0.89 | 0.89 |
| 42 | 0.80 | 0.99 | 0.90 | 0.98 | 0.80 | 0.97 | 1.00 | 1.00 | 0.88 | 0.97 | 0.96 | 0.89 | 0.79 | 0.80 | 0.89 | 0.89 | 0.89 |
| 43 | 0.78 | 0.88 | 0.90 | 0.88 | 0.77 | 0.88 | 0.88 | 0.88 | 1.00 | 0.88 | 0.88 | 0.90 | 0.77 | 0.78 | 0.90 | 0.90 | 0.90 |
| 44 | 0.80 | 0.98 | 0.90 | 0.98 | 0.80 | 0.98 | 0.97 | 0.97 | 0.88 | 1.00 | 0.96 | 0.89 | 0.79 | 0.80 | 0.89 | 0.89 | 0.89 |
| 45 | 0.80 | 0.96 | 0.90 | 0.96 | 0.79 | 0.96 | 0.96 | 0.96 | 0.88 | 0.96 | 1.00 | 0.89 | 0.79 | 0.79 | 0.89 | 0.89 | 0.89 |
| 46 | 0.79 | 0.89 | 0.94 | 0.90 | 0.78 | 0.89 | 0.89 | 0.89 | 0.90 | 0.89 | 0.89 | 1.00 | 0.78 | 0.79 | 1.00 | 0.93 | 0.95 |
| 47 | 0.95 | 0.80 | 0.79 | 0.79 | 0.94 | 0.79 | 0.79 | 0.79 | 0.77 | 0.79 | 0.79 | 0.78 | 1.00 | 0.94 | 0.78 | 0.78 | 0.78 |
| 48 | 0.99 | 0.80 | 0.79 | 0.80 | 0.95 | 0.80 | 0.80 | 0.80 | 0.78 | 0.80 | 0.79 | 0.79 | 0.94 | 1.00 | 0.79 | 0.79 | 0.78 |

|    | 35   | 36   | 37   | 38   | 39   | 40   | 41   | 42   | 43   | 44   | 45   | 46   | 47   | 48   | 49   | 50   | 51   |
|----|------|------|------|------|------|------|------|------|------|------|------|------|------|------|------|------|------|
| 49 | 0.79 | 0.89 | 0.94 | 0.90 | 0.78 | 0.90 | 0.89 | 0.89 | 0.90 | 0.89 | 0.89 | 1.00 | 0.78 | 0.79 | 1.00 | 0.93 | 0.95 |
| 50 | 0.78 | 0.89 | 0.96 | 0.90 | 0.78 | 0.89 | 0.89 | 0.89 | 0.90 | 0.89 | 0.89 | 0.93 | 0.78 | 0.79 | 0.93 | 1.00 | 0.93 |
| 51 | 0.78 | 0.89 | 0.94 | 0.90 | 0.78 | 0.89 | 0.89 | 0.89 | 0.90 | 0.89 | 0.89 | 0.95 | 0.78 | 0.78 | 0.95 | 0.93 | 1.00 |
| 52 | 0.95 | 0.79 | 0.79 | 0.79 | 0.95 | 0.79 | 0.79 | 0.79 | 0.77 | 0.79 | 0.79 | 0.78 | 0.95 | 0.94 | 0.78 | 0.78 | 0.77 |
| 53 | 0.78 | 0.88 | 0.90 | 0.89 | 0.77 | 0.88 | 0.88 | 0.88 | 0.97 | 0.88 | 0.88 | 0.90 | 0.77 | 0.78 | 0.90 | 0.90 | 0.90 |
| 54 | 0.78 | 0.88 | 0.90 | 0.88 | 0.77 | 0.87 | 0.88 | 0.88 | 0.99 | 0.87 | 0.87 | 0.89 | 0.77 | 0.77 | 0.90 | 0.89 | 0.89 |
| 55 | 0.79 | 0.89 | 0.96 | 0.90 | 0.78 | 0.89 | 0.89 | 0.89 | 0.90 | 0.89 | 0.89 | 0.93 | 0.78 | 0.79 | 0.93 | 0.95 | 0.93 |
| 56 | 0.78 | 0.85 | 0.88 | 0.85 | 0.77 | 0.85 | 0.85 | 0.85 | 0.87 | 0.85 | 0.85 | 0.88 | 0.77 | 0.78 | 0.88 | 0.88 | 0.87 |
| 57 | 0.79 | 0.89 | 0.95 | 0.89 | 0.78 | 0.89 | 0.89 | 0.89 | 0.90 | 0.89 | 0.89 | 0.93 | 0.78 | 0.79 | 0.93 | 0.95 | 0.93 |
| 58 | 0.79 | 0.92 | 0.90 | 0.93 | 0.78 | 0.93 | 0.92 | 0.92 | 0.88 | 0.92 | 0.92 | 0.90 | 0.78 | 0.78 | 0.90 | 0.89 | 0.90 |
| 59 | 0.79 | 0.92 | 0.90 | 0.92 | 0.78 | 0.91 | 0.92 | 0.92 | 0.87 | 0.91 | 0.91 | 0.89 | 0.78 | 0.78 | 0.89 | 0.89 | 0.89 |
| 60 | 0.77 | 0.79 | 0.78 | 0.78 | 0.77 | 0.78 | 0.79 | 0.79 | 0.77 | 0.78 | 0.78 | 0.78 | 0.76 | 0.77 | 0.78 | 0.77 | 0.78 |
| 61 | 0.78 | 0.93 | 0.88 | 0.94 | 0.77 | 0.93 | 0.93 | 0.93 | 0.86 | 0.93 | 0.93 | 0.88 | 0.77 | 0.78 | 0.88 | 0.88 | 0.87 |
| 62 | 0.77 | 0.90 | 0.88 | 0.90 | 0.76 | 0.90 | 0.90 | 0.90 | 0.86 | 0.90 | 0.89 | 0.88 | 0.76 | 0.77 | 0.89 | 0.88 | 0.88 |
| 63 | 0.76 | 0.88 | 0.87 | 0.88 | 0.76 | 0.88 | 0.88 | 0.88 | 0.85 | 0.88 | 0.87 | 0.87 | 0.75 | 0.76 | 0.88 | 0.87 | 0.87 |
| 64 | 0.66 | 0.68 | 0.68 | 0.68 | 0.65 | 0.68 | 0.68 | 0.68 | 0.68 | 0.68 | 0.68 | 0.68 | 0.65 | 0.66 | 0.68 | 0.69 | 0.69 |
| 65 | 0.66 | 0.68 | 0.68 | 0.68 | 0.65 | 0.68 | 0.68 | 0.68 | 0.67 | 0.68 | 0.67 | 0.68 | 0.65 | 0.66 | 0.68 | 0.68 | 0.68 |
| 66 | 0.54 | 0.56 | 0.56 | 0.56 | 0.54 | 0.56 | 0.56 | 0.56 | 0.56 | 0.56 | 0.55 | 0.56 | 0.54 | 0.54 | 0.56 | 0.56 | 0.56 |
| 67 | 0.53 | 0.54 | 0.54 | 0.54 | 0.53 | 0.54 | 0.54 | 0.54 | 0.53 | 0.54 | 0.53 | 0.53 | 0.52 | 0.52 | 0.53 | 0.53 | 0.53 |
| 68 | 0.40 | 0.41 | 0.41 | 0.41 | 0.40 | 0.40 | 0.41 | 0.41 | 0.41 | 0.40 | 0.41 | 0.41 | 0.40 | 0.39 | 0.41 | 0.41 | 0.40 |



|    | 52   | 53   | 54   | 55   | 56   | 57   | 58   | 59   | 60   | 61   | 62   | 63   | 64   | 65   | 66   | 67   | 68   |
|----|------|------|------|------|------|------|------|------|------|------|------|------|------|------|------|------|------|
| 1  | 0.77 | 0.77 | 0.77 | 0.77 | 0.77 | 0.77 | 0.76 | 0.76 | 0.76 | 0.75 | 0.75 | 0.75 | 0.69 | 0.69 | 0.56 | 0.55 | 0.42 |
| 2  | 0.77 | 0.77 | 0.77 | 0.77 | 0.77 | 0.77 | 0.77 | 0.77 | 0.76 | 0.76 | 0.76 | 0.75 | 0.71 | 0.71 | 0.57 | 0.55 | 0.40 |
| 3  | 0.76 | 0.74 | 0.74 | 0.75 | 0.75 | 0.75 | 0.74 | 0.74 | 0.75 | 0.74 | 0.73 | 0.73 | 0.67 | 0.67 | 0.56 | 0.54 | 0.41 |
| 4  | 0.75 | 0.74 | 0.74 | 0.75 | 0.75 | 0.75 | 0.74 | 0.74 | 0.74 | 0.73 | 0.73 | 0.73 | 0.67 | 0.68 | 0.56 | 0.54 | 0.41 |
| 5  | 0.76 | 0.76 | 0.76 | 0.76 | 0.76 | 0.76 | 0.76 | 0.76 | 0.75 | 0.75 | 0.75 | 0.74 | 0.69 | 0.69 | 0.55 | 0.54 | 0.41 |
| 6  | 0.76 | 0.77 | 0.77 | 0.78 | 0.77 | 0.78 | 0.77 | 0.77 | 0.76 | 0.76 | 0.76 | 0.75 | 0.69 | 0.70 | 0.56 | 0.55 | 0.41 |
| 7  | 0.77 | 0.77 | 0.77 | 0.77 | 0.77 | 0.77 | 0.77 | 0.77 | 0.76 | 0.76 | 0.76 | 0.75 | 0.69 | 0.69 | 0.55 | 0.54 | 0.41 |
| 8  | 0.75 | 0.78 | 0.77 | 0.78 | 0.77 | 0.78 | 0.78 | 0.77 | 0.75 | 0.76 | 0.77 | 0.76 | 0.69 | 0.70 | 0.56 | 0.55 | 0.41 |
| 9  | 0.76 | 0.77 | 0.77 | 0.77 | 0.76 | 0.77 | 0.77 | 0.77 | 0.76 | 0.76 | 0.76 | 0.75 | 0.69 | 0.69 | 0.55 | 0.54 | 0.41 |
| 10 | 0.76 | 0.78 | 0.77 | 0.79 | 0.77 | 0.78 | 0.78 | 0.78 | 0.76 | 0.77 | 0.77 | 0.76 | 0.69 | 0.70 | 0.56 | 0.55 | 0.41 |
| 11 | 0.76 | 0.78 | 0.77 | 0.79 | 0.77 | 0.78 | 0.78 | 0.78 | 0.76 | 0.77 | 0.77 | 0.76 | 0.69 | 0.70 | 0.56 | 0.54 | 0.40 |
| 12 | 0.74 | 0.74 | 0.74 | 0.75 | 0.75 | 0.75 | 0.75 | 0.75 | 0.74 | 0.74 | 0.74 | 0.73 | 0.67 | 0.68 | 0.56 | 0.54 | 0.40 |
| 13 | 0.82 | 0.81 | 0.81 | 0.82 | 0.81 | 0.81 | 0.81 | 0.81 | 0.78 | 0.81 | 0.79 | 0.79 | 0.69 | 0.68 | 0.56 | 0.54 | 0.42 |
| 14 | 0.82 | 0.80 | 0.80 | 0.80 | 0.80 | 0.80 | 0.80 | 0.80 | 0.78 | 0.80 | 0.79 | 0.78 | 0.67 | 0.67 | 0.55 | 0.53 | 0.41 |
| 15 | 0.82 | 0.82 | 0.82 | 0.83 | 0.82 | 0.83 | 0.82 | 0.82 | 0.80 | 0.81 | 0.81 | 0.80 | 0.68 | 0.68 | 0.56 | 0.54 | 0.41 |
| 16 | 0.72 | 0.73 | 0.72 | 0.73 | 0.72 | 0.73 | 0.73 | 0.73 | 0.72 | 0.72 | 0.72 | 0.72 | 0.67 | 0.67 | 0.55 | 0.54 | 0.41 |
| 17 | 0.81 | 0.81 | 0.81 | 0.82 | 0.80 | 0.82 | 0.82 | 0.82 | 0.84 | 0.80 | 0.80 | 0.80 | 0.69 | 0.69 | 0.57 | 0.54 | 0.41 |
| 18 | 0.83 | 0.83 | 0.83 | 0.84 | 0.82 | 0.84 | 0.83 | 0.83 | 0.81 | 0.82 | 0.82 | 0.81 | 0.68 | 0.68 | 0.56 | 0.54 | 0.40 |
| 19 | 0.81 | 0.81 | 0.81 | 0.81 | 0.80 | 0.81 | 0.81 | 0.82 | 0.84 | 0.80 | 0.80 | 0.80 | 0.68 | 0.68 | 0.57 | 0.54 | 0.41 |
| 20 | 0.79 | 0.78 | 0.78 | 0.79 | 0.79 | 0.79 | 0.78 | 0.78 | 0.77 | 0.78 | 0.77 | 0.76 | 0.67 | 0.67 | 0.55 | 0.53 | 0.41 |
| 21 | 0.79 | 0.79 | 0.79 | 0.80 | 0.79 | 0.79 | 0.78 | 0.78 | 0.77 | 0.78 | 0.77 | 0.77 | 0.67 | 0.67 | 0.55 | 0.53 | 0.41 |
| 22 | 0.79 | 0.78 | 0.78 | 0.80 | 0.79 | 0.80 | 0.78 | 0.78 | 0.77 | 0.78 | 0.77 | 0.77 | 0.68 | 0.68 | 0.55 | 0.53 | 0.41 |
| 23 | 0.76 | 0.78 | 0.78 | 0.78 | 0.78 | 0.78 | 0.78 | 0.78 | 0.75 | 0.76 | 0.77 | 0.76 | 0.68 | 0.69 | 0.56 | 0.54 | 0.41 |
| 24 | 0.84 | 0.80 | 0.80 | 0.80 | 0.80 | 0.80 | 0.80 | 0.80 | 0.78 | 0.79 | 0.79 | 0.77 | 0.66 | 0.67 | 0.55 | 0.53 | 0.40 |

|    | 52   | 53   | 54   | 55   | 56   | 57   | 58   | 59   | 60   | 61   | 62   | 63   | 64   | 65   | 66   | 67   | 68   |
|----|------|------|------|------|------|------|------|------|------|------|------|------|------|------|------|------|------|
| 25 | 0.79 | 0.94 | 0.94 | 0.92 | 0.88 | 0.92 | 0.90 | 0.89 | 0.79 | 0.88 | 0.88 | 0.86 | 0.68 | 0.68 | 0.56 | 0.54 | 0.41 |
| 26 | 0.80 | 0.82 | 0.81 | 0.82 | 0.81 | 0.82 | 0.82 | 0.82 | 0.86 | 0.81 | 0.81 | 0.80 | 0.69 | 0.69 | 0.57 | 0.54 | 0.40 |
| 27 | 0.78 | 0.77 | 0.77 | 0.79 | 0.78 | 0.78 | 0.77 | 0.77 | 0.76 | 0.77 | 0.76 | 0.76 | 0.67 | 0.67 | 0.54 | 0.53 | 0.41 |
| 28 | 0.79 | 0.89 | 0.88 | 0.89 | 0.88 | 0.89 | 0.87 | 0.87 | 0.77 | 0.86 | 0.86 | 0.84 | 0.68 | 0.67 | 0.56 | 0.54 | 0.41 |
| 29 | 0.80 | 0.93 | 0.92 | 0.92 | 0.89 | 0.92 | 0.89 | 0.89 | 0.79 | 0.88 | 0.88 | 0.86 | 0.68 | 0.68 | 0.56 | 0.54 | 0.41 |
| 30 | 0.79 | 0.93 | 0.92 | 0.92 | 0.88 | 0.92 | 0.89 | 0.89 | 0.79 | 0.88 | 0.88 | 0.86 | 0.68 | 0.68 | 0.56 | 0.54 | 0.41 |
| 31 | 0.96 | 0.78 | 0.78 | 0.79 | 0.78 | 0.79 | 0.79 | 0.79 | 0.77 | 0.78 | 0.77 | 0.76 | 0.66 | 0.66 | 0.54 | 0.53 | 0.40 |
| 32 | 0.79 | 0.93 | 0.93 | 0.93 | 0.88 | 0.92 | 0.90 | 0.89 | 0.79 | 0.88 | 0.88 | 0.86 | 0.68 | 0.68 | 0.57 | 0.54 | 0.41 |
| 33 | 0.95 | 0.77 | 0.77 | 0.78 | 0.77 | 0.78 | 0.78 | 0.78 | 0.77 | 0.77 | 0.76 | 0.76 | 0.65 | 0.66 | 0.54 | 0.53 | 0.40 |
| 34 | 0.96 | 0.78 | 0.78 | 0.79 | 0.77 | 0.78 | 0.78 | 0.78 | 0.77 | 0.77 | 0.76 | 0.76 | 0.65 | 0.66 | 0.55 | 0.53 | 0.41 |
| 35 | 0.95 | 0.78 | 0.78 | 0.79 | 0.78 | 0.79 | 0.79 | 0.79 | 0.77 | 0.78 | 0.77 | 0.76 | 0.66 | 0.66 | 0.54 | 0.53 | 0.40 |
| 36 | 0.79 | 0.88 | 0.88 | 0.89 | 0.85 | 0.89 | 0.92 | 0.92 | 0.79 | 0.93 | 0.90 | 0.88 | 0.68 | 0.68 | 0.56 | 0.54 | 0.41 |
| 37 | 0.79 | 0.90 | 0.90 | 0.96 | 0.88 | 0.95 | 0.90 | 0.90 | 0.78 | 0.88 | 0.88 | 0.87 | 0.68 | 0.68 | 0.56 | 0.54 | 0.41 |
| 38 | 0.79 | 0.89 | 0.88 | 0.90 | 0.85 | 0.89 | 0.93 | 0.92 | 0.78 | 0.94 | 0.90 | 0.88 | 0.68 | 0.68 | 0.56 | 0.54 | 0.41 |
| 39 | 0.95 | 0.77 | 0.77 | 0.78 | 0.77 | 0.78 | 0.78 | 0.78 | 0.77 | 0.77 | 0.76 | 0.76 | 0.65 | 0.65 | 0.54 | 0.53 | 0.40 |
| 40 | 0.79 | 0.88 | 0.87 | 0.89 | 0.85 | 0.89 | 0.93 | 0.91 | 0.78 | 0.93 | 0.90 | 0.88 | 0.68 | 0.68 | 0.56 | 0.54 | 0.40 |
| 41 | 0.79 | 0.88 | 0.88 | 0.89 | 0.85 | 0.89 | 0.92 | 0.92 | 0.79 | 0.93 | 0.90 | 0.88 | 0.68 | 0.68 | 0.56 | 0.54 | 0.41 |
| 42 | 0.79 | 0.88 | 0.88 | 0.89 | 0.85 | 0.89 | 0.92 | 0.92 | 0.79 | 0.93 | 0.90 | 0.88 | 0.68 | 0.68 | 0.56 | 0.54 | 0.41 |
| 43 | 0.77 | 0.97 | 0.99 | 0.90 | 0.87 | 0.90 | 0.88 | 0.87 | 0.77 | 0.86 | 0.86 | 0.85 | 0.68 | 0.67 | 0.56 | 0.53 | 0.41 |
| 44 | 0.79 | 0.88 | 0.87 | 0.89 | 0.85 | 0.89 | 0.92 | 0.91 | 0.78 | 0.93 | 0.90 | 0.88 | 0.68 | 0.68 | 0.56 | 0.54 | 0.40 |
| 45 | 0.79 | 0.88 | 0.87 | 0.89 | 0.85 | 0.89 | 0.92 | 0.91 | 0.78 | 0.93 | 0.89 | 0.87 | 0.68 | 0.67 | 0.55 | 0.53 | 0.41 |
| 46 | 0.78 | 0.90 | 0.89 | 0.93 | 0.88 | 0.93 | 0.90 | 0.89 | 0.78 | 0.88 | 0.88 | 0.87 | 0.68 | 0.68 | 0.56 | 0.53 | 0.41 |
| 47 | 0.95 | 0.77 | 0.77 | 0.78 | 0.77 | 0.78 | 0.78 | 0.78 | 0.76 | 0.77 | 0.76 | 0.75 | 0.65 | 0.65 | 0.54 | 0.52 | 0.40 |
| 48 | 0.94 | 0.78 | 0.77 | 0.79 | 0.78 | 0.79 | 0.78 | 0.78 | 0.77 | 0.78 | 0.77 | 0.76 | 0.66 | 0.66 | 0.54 | 0.52 | 0.39 |

|    | 52   | 53   | 54   | 55   | 56   | 57   | 58   | 59   | 60   | 61   | 62   | 63   | 64   | 65   | 66   | 67   | 68   |
|----|------|------|------|------|------|------|------|------|------|------|------|------|------|------|------|------|------|
| 49 | 0.78 | 0.90 | 0.90 | 0.93 | 0.88 | 0.93 | 0.90 | 0.89 | 0.78 | 0.88 | 0.89 | 0.88 | 0.68 | 0.68 | 0.56 | 0.53 | 0.41 |
| 50 | 0.78 | 0.90 | 0.89 | 0.95 | 0.88 | 0.95 | 0.89 | 0.89 | 0.77 | 0.88 | 0.88 | 0.87 | 0.69 | 0.68 | 0.56 | 0.53 | 0.41 |
| 51 | 0.77 | 0.90 | 0.89 | 0.93 | 0.87 | 0.93 | 0.90 | 0.89 | 0.78 | 0.87 | 0.88 | 0.87 | 0.69 | 0.68 | 0.56 | 0.53 | 0.40 |
| 52 | 1.00 | 0.77 | 0.77 | 0.78 | 0.77 | 0.78 | 0.78 | 0.77 | 0.76 | 0.77 | 0.76 | 0.75 | 0.65 | 0.65 | 0.54 | 0.53 | 0.40 |
| 53 | 0.77 | 1.00 | 0.96 | 0.90 | 0.87 | 0.90 | 0.88 | 0.87 | 0.77 | 0.86 | 0.86 | 0.85 | 0.67 | 0.67 | 0.56 | 0.53 | 0.40 |
| 54 | 0.77 | 0.96 | 1.00 | 0.89 | 0.87 | 0.89 | 0.87 | 0.87 | 0.77 | 0.85 | 0.85 | 0.85 | 0.67 | 0.67 | 0.56 | 0.53 | 0.41 |
| 55 | 0.78 | 0.90 | 0.89 | 1.00 | 0.87 | 0.99 | 0.90 | 0.89 | 0.78 | 0.88 | 0.88 | 0.87 | 0.69 | 0.68 | 0.56 | 0.54 | 0.41 |
| 56 | 0.77 | 0.87 | 0.87 | 0.87 | 1.00 | 0.87 | 0.85 | 0.85 | 0.76 | 0.83 | 0.85 | 0.84 | 0.67 | 0.66 | 0.55 | 0.53 | 0.40 |
| 57 | 0.78 | 0.90 | 0.89 | 0.99 | 0.87 | 1.00 | 0.90 | 0.89 | 0.77 | 0.88 | 0.88 | 0.87 | 0.68 | 0.67 | 0.56 | 0.54 | 0.41 |
| 58 | 0.78 | 0.88 | 0.87 | 0.90 | 0.85 | 0.90 | 1.00 | 0.93 | 0.77 | 0.91 | 0.91 | 0.88 | 0.68 | 0.67 | 0.56 | 0.53 | 0.40 |
| 59 | 0.77 | 0.87 | 0.87 | 0.89 | 0.85 | 0.89 | 0.93 | 1.00 | 0.77 | 0.90 | 0.92 | 0.88 | 0.67 | 0.67 | 0.56 | 0.53 | 0.40 |
| 60 | 0.76 | 0.77 | 0.77 | 0.78 | 0.76 | 0.77 | 0.77 | 0.77 | 1.00 | 0.75 | 0.76 | 0.75 | 0.65 | 0.66 | 0.54 | 0.52 | 0.40 |
| 61 | 0.77 | 0.86 | 0.85 | 0.88 | 0.83 | 0.88 | 0.91 | 0.90 | 0.75 | 1.00 | 0.89 | 0.86 | 0.67 | 0.66 | 0.55 | 0.53 | 0.40 |
| 62 | 0.76 | 0.86 | 0.85 | 0.88 | 0.85 | 0.88 | 0.91 | 0.92 | 0.76 | 0.89 | 1.00 | 0.88 | 0.67 | 0.67 | 0.55 | 0.53 | 0.40 |
| 63 | 0.75 | 0.85 | 0.85 | 0.87 | 0.84 | 0.87 | 0.88 | 0.88 | 0.75 | 0.86 | 0.88 | 1.00 | 0.67 | 0.66 | 0.55 | 0.52 | 0.39 |
| 64 | 0.65 | 0.67 | 0.67 | 0.69 | 0.67 | 0.68 | 0.68 | 0.67 | 0.65 | 0.67 | 0.67 | 0.67 | 1.00 | 0.87 | 0.57 | 0.54 | 0.40 |
| 65 | 0.65 | 0.67 | 0.67 | 0.68 | 0.66 | 0.67 | 0.67 | 0.67 | 0.66 | 0.66 | 0.67 | 0.66 | 0.87 | 1.00 | 0.58 | 0.54 | 0.40 |
| 66 | 0.54 | 0.56 | 0.56 | 0.56 | 0.55 | 0.56 | 0.56 | 0.56 | 0.54 | 0.55 | 0.55 | 0.55 | 0.57 | 0.58 | 1.00 | 0.47 | 0.37 |
| 67 | 0.53 | 0.53 | 0.53 | 0.54 | 0.53 | 0.54 | 0.53 | 0.53 | 0.52 | 0.53 | 0.53 | 0.52 | 0.54 | 0.54 | 0.47 | 1.00 | 0.43 |
| 68 | 0.40 | 0.40 | 0.41 | 0.41 | 0.40 | 0.41 | 0.40 | 0.40 | 0.40 | 0.40 | 0.40 | 0.39 | 0.40 | 0.40 | 0.37 | 0.43 | 1.00 |

**Table S6. Pairwise Distances between Sequences in the MYBPC3 Alignment**

This table shows the pairwise alignment distances between sequences in the manual MYBPC3 alignment. Sequences are ordered and numbered as in table S3.

|    | 1    | 2    | 3    | 4    | 5    | 6    | 7    | 8    | 9    | 10   | 11   | 12   | 13   | 14   | 15   | 16   | 17   |
|----|------|------|------|------|------|------|------|------|------|------|------|------|------|------|------|------|------|
| 1  | 1.00 | 0.92 | 0.92 | 0.92 | 0.90 | 0.90 | 0.90 | 0.90 | 0.90 | 0.90 | 0.90 | 0.90 | 0.89 | 0.87 | 0.72 | 0.71 | 0.71 |
| 2  | 0.92 | 1.00 | 0.94 | 0.99 | 0.91 | 0.91 | 0.91 | 0.91 | 0.92 | 0.92 | 0.91 | 0.91 | 0.90 | 0.87 | 0.72 | 0.72 | 0.72 |
| 3  | 0.92 | 0.94 | 1.00 | 0.94 | 0.91 | 0.91 | 0.91 | 0.91 | 0.91 | 0.91 | 0.90 | 0.90 | 0.90 | 0.87 | 0.73 | 0.73 | 0.73 |
| 4  | 0.92 | 0.99 | 0.94 | 1.00 | 0.91 | 0.91 | 0.91 | 0.91 | 0.91 | 0.91 | 0.90 | 0.90 | 0.90 | 0.86 | 0.72 | 0.71 | 0.71 |
| 5  | 0.90 | 0.91 | 0.91 | 0.91 | 1.00 | 1.00 | 1.00 | 1.00 | 0.88 | 0.88 | 0.97 | 0.97 | 0.99 | 0.87 | 0.72 | 0.72 | 0.72 |
| 6  | 0.90 | 0.91 | 0.91 | 0.91 | 1.00 | 1.00 | 1.00 | 1.00 | 0.88 | 0.88 | 0.97 | 0.97 | 0.99 | 0.88 | 0.72 | 0.72 | 0.72 |
| 7  | 0.90 | 0.91 | 0.91 | 0.91 | 1.00 | 1.00 | 1.00 | 1.00 | 0.88 | 0.88 | 0.97 | 0.97 | 0.99 | 0.88 | 0.72 | 0.72 | 0.72 |
| 8  | 0.90 | 0.91 | 0.91 | 0.91 | 1.00 | 1.00 | 1.00 | 1.00 | 0.88 | 0.88 | 0.97 | 0.97 | 0.99 | 0.88 | 0.72 | 0.72 | 0.72 |
| 9  | 0.90 | 0.92 | 0.91 | 0.91 | 0.88 | 0.88 | 0.88 | 0.88 | 1.00 | 1.00 | 0.88 | 0.88 | 0.88 | 0.86 | 0.72 | 0.72 | 0.72 |
| 10 | 0.90 | 0.92 | 0.91 | 0.91 | 0.88 | 0.88 | 0.88 | 0.88 | 1.00 | 1.00 | 0.88 | 0.88 | 0.88 | 0.86 | 0.72 | 0.72 | 0.72 |
| 11 | 0.90 | 0.91 | 0.90 | 0.90 | 0.97 | 0.97 | 0.97 | 0.97 | 0.88 | 0.88 | 1.00 | 1.00 | 0.96 | 0.88 | 0.72 | 0.72 | 0.72 |
| 12 | 0.90 | 0.91 | 0.90 | 0.90 | 0.97 | 0.97 | 0.97 | 0.97 | 0.88 | 0.88 | 1.00 | 1.00 | 0.96 | 0.88 | 0.72 | 0.72 | 0.72 |
| 13 | 0.89 | 0.90 | 0.90 | 0.90 | 0.99 | 0.99 | 0.99 | 0.99 | 0.88 | 0.88 | 0.96 | 0.96 | 1.00 | 0.87 | 0.71 | 0.72 | 0.71 |
| 14 | 0.87 | 0.87 | 0.87 | 0.86 | 0.87 | 0.88 | 0.88 | 0.88 | 0.86 | 0.86 | 0.88 | 0.88 | 0.87 | 1.00 | 0.73 | 0.73 | 0.72 |
| 15 | 0.72 | 0.72 | 0.73 | 0.72 | 0.72 | 0.72 | 0.72 | 0.72 | 0.72 | 0.72 | 0.72 | 0.72 | 0.71 | 0.73 | 1.00 | 1.00 | 1.00 |
| 16 | 0.71 | 0.72 | 0.73 | 0.71 | 0.72 | 0.72 | 0.72 | 0.72 | 0.72 | 0.72 | 0.72 | 0.72 | 0.72 | 0.73 | 1.00 | 1.00 | 0.99 |
| 17 | 0.71 | 0.72 | 0.73 | 0.71 | 0.72 | 0.72 | 0.72 | 0.72 | 0.72 | 0.72 | 0.72 | 0.72 | 0.71 | 0.72 | 1.00 | 0.99 | 1.00 |
| 18 | 0.71 | 0.72 | 0.73 | 0.72 | 0.72 | 0.72 | 0.72 | 0.72 | 0.72 | 0.72 | 0.72 | 0.72 | 0.71 | 0.73 | 1.00 | 1.00 | 0.99 |
| 19 | 0.68 | 0.68 | 0.69 | 0.68 | 0.69 | 0.70 | 0.70 | 0.70 | 0.68 | 0.68 | 0.69 | 0.69 | 0.69 | 0.69 | 0.77 | 0.77 | 0.76 |
| 20 | 0.68 | 0.68 | 0.69 | 0.67 | 0.70 | 0.70 | 0.70 | 0.70 | 0.68 | 0.67 | 0.69 | 0.69 | 0.69 | 0.69 | 0.76 | 0.76 | 0.75 |
| 21 | 0.68 | 0.69 | 0.70 | 0.69 | 0.70 | 0.70 | 0.70 | 0.70 | 0.68 | 0.68 | 0.69 | 0.69 | 0.69 | 0.70 | 0.77 | 0.76 | 0.76 |
| 22 | 0.68 | 0.68 | 0.69 | 0.68 | 0.69 | 0.69 | 0.70 | 0.70 | 0.67 | 0.67 | 0.69 | 0.69 | 0.69 | 0.69 | 0.76 | 0.76 | 0.76 |
| 23 | 0.68 | 0.68 | 0.69 | 0.68 | 0.69 | 0.69 | 0.70 | 0.70 | 0.67 | 0.67 | 0.69 | 0.69 | 0.69 | 0.69 | 0.77 | 0.76 | 0.76 |
| 24 | 0.67 | 0.68 | 0.67 | 0.67 | 0.67 | 0.67 | 0.68 | 0.68 | 0.66 | 0.66 | 0.67 | 0.67 | 0.67 | 0.68 | 0.72 | 0.72 | 0.72 |

|    | 1    | 2    | 3    | 4    | 5    | 6    | 7    | 8    | 9    | 10   | 11   | 12   | 13   | 14   | 15   | 16   | 17   |
|----|------|------|------|------|------|------|------|------|------|------|------|------|------|------|------|------|------|
| 25 | 0.67 | 0.67 | 0.68 | 0.67 | 0.69 | 0.69 | 0.69 | 0.69 | 0.66 | 0.66 | 0.68 | 0.68 | 0.68 | 0.71 | 0.77 | 0.77 | 0.77 |
| 26 | 0.66 | 0.67 | 0.67 | 0.67 | 0.66 | 0.66 | 0.66 | 0.66 | 0.65 | 0.65 | 0.66 | 0.66 | 0.66 | 0.67 | 0.71 | 0.71 | 0.71 |
| 27 | 0.65 | 0.66 | 0.66 | 0.66 | 0.65 | 0.65 | 0.65 | 0.65 | 0.64 | 0.64 | 0.65 | 0.65 | 0.65 | 0.66 | 0.70 | 0.70 | 0.70 |
| 28 | 0.64 | 0.65 | 0.65 | 0.64 | 0.64 | 0.64 | 0.64 | 0.64 | 0.63 | 0.64 | 0.64 | 0.64 | 0.63 | 0.66 | 0.71 | 0.70 | 0.70 |
| 29 | 0.63 | 0.63 | 0.63 | 0.63 | 0.63 | 0.63 | 0.63 | 0.63 | 0.62 | 0.62 | 0.63 | 0.63 | 0.62 | 0.66 | 0.71 | 0.70 | 0.70 |
| 30 | 0.59 | 0.59 | 0.58 | 0.59 | 0.59 | 0.59 | 0.59 | 0.59 | 0.58 | 0.58 | 0.59 | 0.59 | 0.58 | 0.59 | 0.61 | 0.61 | 0.61 |
| 31 | 0.59 | 0.59 | 0.58 | 0.59 | 0.59 | 0.59 | 0.59 | 0.59 | 0.58 | 0.58 | 0.59 | 0.59 | 0.58 | 0.59 | 0.61 | 0.61 | 0.61 |
| 32 | 0.59 | 0.59 | 0.58 | 0.59 | 0.59 | 0.59 | 0.59 | 0.59 | 0.58 | 0.58 | 0.59 | 0.59 | 0.58 | 0.59 | 0.61 | 0.61 | 0.61 |
| 33 | 0.58 | 0.59 | 0.58 | 0.59 | 0.59 | 0.59 | 0.59 | 0.59 | 0.58 | 0.58 | 0.58 | 0.58 | 0.58 | 0.59 | 0.61 | 0.61 | 0.61 |
| 34 | 0.57 | 0.58 | 0.58 | 0.58 | 0.57 | 0.57 | 0.57 | 0.57 | 0.57 | 0.57 | 0.57 | 0.57 | 0.57 | 0.56 | 0.58 | 0.57 | 0.56 |
| 35 | 0.57 | 0.58 | 0.57 | 0.58 | 0.58 | 0.58 | 0.58 | 0.58 | 0.57 | 0.57 | 0.58 | 0.58 | 0.57 | 0.59 | 0.60 | 0.60 | 0.60 |
| 36 | 0.57 | 0.58 | 0.58 | 0.58 | 0.57 | 0.57 | 0.57 | 0.57 | 0.57 | 0.57 | 0.57 | 0.57 | 0.57 | 0.58 | 0.61 | 0.61 | 0.61 |
| 37 | 0.57 | 0.58 | 0.58 | 0.58 | 0.58 | 0.58 | 0.58 | 0.58 | 0.57 | 0.57 | 0.57 | 0.57 | 0.57 | 0.58 | 0.61 | 0.60 | 0.60 |
| 38 | 0.57 | 0.58 | 0.58 | 0.58 | 0.58 | 0.58 | 0.58 | 0.58 | 0.57 | 0.56 | 0.57 | 0.57 | 0.57 | 0.58 | 0.61 | 0.60 | 0.60 |
| 39 | 0.57 | 0.57 | 0.57 | 0.57 | 0.57 | 0.57 | 0.57 | 0.57 | 0.56 | 0.56 | 0.57 | 0.57 | 0.56 | 0.57 | 0.58 | 0.58 | 0.58 |
| 40 | 0.57 | 0.57 | 0.56 | 0.57 | 0.57 | 0.57 | 0.57 | 0.57 | 0.56 | 0.56 | 0.57 | 0.57 | 0.56 | 0.56 | 0.58 | 0.58 | 0.57 |
| 41 | 0.57 | 0.57 | 0.57 | 0.57 | 0.57 | 0.57 | 0.57 | 0.57 | 0.56 | 0.56 | 0.57 | 0.57 | 0.56 | 0.57 | 0.60 | 0.60 | 0.60 |
| 42 | 0.56 | 0.57 | 0.57 | 0.57 | 0.57 | 0.57 | 0.57 | 0.57 | 0.56 | 0.56 | 0.57 | 0.57 | 0.56 | 0.57 | 0.60 | 0.60 | 0.60 |
| 43 | 0.56 | 0.57 | 0.56 | 0.57 | 0.57 | 0.57 | 0.57 | 0.57 | 0.56 | 0.56 | 0.57 | 0.57 | 0.56 | 0.56 | 0.58 | 0.58 | 0.57 |
| 44 | 0.56 | 0.56 | 0.56 | 0.56 | 0.56 | 0.57 | 0.57 | 0.57 | 0.56 | 0.56 | 0.57 | 0.57 | 0.56 | 0.56 | 0.58 | 0.58 | 0.57 |
| 45 | 0.56 | 0.56 | 0.56 | 0.56 | 0.56 | 0.56 | 0.56 | 0.56 | 0.56 | 0.56 | 0.56 | 0.56 | 0.56 | 0.56 | 0.57 | 0.57 | 0.57 |
| 46 | 0.56 | 0.56 | 0.56 | 0.56 | 0.56 | 0.56 | 0.56 | 0.56 | 0.56 | 0.56 | 0.56 | 0.56 | 0.56 | 0.56 | 0.57 | 0.57 | 0.57 |
| 47 | 0.56 | 0.56 | 0.56 | 0.56 | 0.56 | 0.56 | 0.56 | 0.56 | 0.56 | 0.55 | 0.56 | 0.56 | 0.56 | 0.56 | 0.57 | 0.57 | 0.57 |
| 48 | 0.56 | 0.56 | 0.56 | 0.56 | 0.56 | 0.56 | 0.56 | 0.56 | 0.55 | 0.55 | 0.56 | 0.56 | 0.55 | 0.56 | 0.57 | 0.57 | 0.57 |

|    | 1    | 2    | 3    | 4    | 5    | 6    | 7    | 8    | 9    | 10   | 11   | 12   | 13   | 14   | 15   | 16   | 17   |
|----|------|------|------|------|------|------|------|------|------|------|------|------|------|------|------|------|------|
| 49 | 0.56 | 0.56 | 0.56 | 0.56 | 0.56 | 0.56 | 0.56 | 0.56 | 0.55 | 0.55 | 0.56 | 0.56 | 0.55 | 0.56 | 0.57 | 0.57 | 0.57 |
| 50 | 0.55 | 0.56 | 0.56 | 0.56 | 0.56 | 0.56 | 0.56 | 0.56 | 0.56 | 0.56 | 0.56 | 0.56 | 0.55 | 0.56 | 0.59 | 0.59 | 0.58 |

|    | 18   | 19   | 20   | 21   | 22   | 23   | 24   | 25   | 26   | 27   | 28   | 29   | 30   | 31   | 32   | 33   | 34   |
|----|------|------|------|------|------|------|------|------|------|------|------|------|------|------|------|------|------|
| 1  | 0.71 | 0.68 | 0.68 | 0.68 | 0.68 | 0.68 | 0.67 | 0.67 | 0.66 | 0.65 | 0.64 | 0.63 | 0.59 | 0.59 | 0.59 | 0.58 | 0.57 |
| 2  | 0.72 | 0.68 | 0.68 | 0.69 | 0.68 | 0.68 | 0.68 | 0.67 | 0.67 | 0.66 | 0.65 | 0.63 | 0.59 | 0.59 | 0.59 | 0.59 | 0.58 |
| 3  | 0.73 | 0.69 | 0.69 | 0.70 | 0.69 | 0.69 | 0.67 | 0.68 | 0.67 | 0.66 | 0.65 | 0.63 | 0.58 | 0.58 | 0.58 | 0.58 | 0.58 |
| 4  | 0.72 | 0.68 | 0.67 | 0.69 | 0.68 | 0.68 | 0.67 | 0.67 | 0.67 | 0.66 | 0.64 | 0.63 | 0.59 | 0.59 | 0.59 | 0.59 | 0.58 |
| 5  | 0.72 | 0.69 | 0.70 | 0.70 | 0.69 | 0.69 | 0.67 | 0.69 | 0.66 | 0.65 | 0.64 | 0.63 | 0.59 | 0.59 | 0.59 | 0.59 | 0.57 |
| 6  | 0.72 | 0.70 | 0.70 | 0.70 | 0.69 | 0.69 | 0.67 | 0.69 | 0.66 | 0.65 | 0.64 | 0.63 | 0.59 | 0.59 | 0.59 | 0.59 | 0.57 |
| 7  | 0.72 | 0.70 | 0.70 | 0.70 | 0.70 | 0.70 | 0.68 | 0.69 | 0.66 | 0.65 | 0.64 | 0.63 | 0.59 | 0.59 | 0.59 | 0.59 | 0.57 |
| 8  | 0.72 | 0.70 | 0.70 | 0.70 | 0.70 | 0.70 | 0.68 | 0.69 | 0.66 | 0.65 | 0.64 | 0.63 | 0.59 | 0.59 | 0.59 | 0.59 | 0.57 |
| 9  | 0.72 | 0.68 | 0.68 | 0.68 | 0.67 | 0.67 | 0.66 | 0.66 | 0.65 | 0.64 | 0.63 | 0.62 | 0.58 | 0.58 | 0.58 | 0.58 | 0.57 |
| 10 | 0.72 | 0.68 | 0.67 | 0.68 | 0.67 | 0.67 | 0.66 | 0.66 | 0.65 | 0.64 | 0.64 | 0.62 | 0.58 | 0.58 | 0.58 | 0.58 | 0.57 |
| 11 | 0.72 | 0.69 | 0.69 | 0.69 | 0.69 | 0.69 | 0.67 | 0.68 | 0.66 | 0.65 | 0.64 | 0.63 | 0.59 | 0.59 | 0.59 | 0.58 | 0.57 |
| 12 | 0.72 | 0.69 | 0.69 | 0.69 | 0.69 | 0.69 | 0.67 | 0.68 | 0.66 | 0.65 | 0.64 | 0.63 | 0.59 | 0.59 | 0.59 | 0.58 | 0.57 |
| 13 | 0.71 | 0.69 | 0.69 | 0.69 | 0.69 | 0.69 | 0.67 | 0.68 | 0.66 | 0.65 | 0.63 | 0.62 | 0.58 | 0.58 | 0.58 | 0.58 | 0.56 |
| 14 | 0.73 | 0.69 | 0.69 | 0.70 | 0.69 | 0.69 | 0.68 | 0.71 | 0.67 | 0.66 | 0.66 | 0.66 | 0.59 | 0.59 | 0.59 | 0.59 | 0.58 |
| 15 | 1.00 | 0.77 | 0.76 | 0.77 | 0.76 | 0.77 | 0.72 | 0.77 | 0.71 | 0.70 | 0.71 | 0.71 | 0.61 | 0.61 | 0.61 | 0.61 | 0.57 |
| 16 | 1.00 | 0.77 | 0.76 | 0.76 | 0.76 | 0.76 | 0.72 | 0.77 | 0.71 | 0.70 | 0.70 | 0.70 | 0.61 | 0.61 | 0.61 | 0.61 | 0.57 |
| 17 | 0.99 | 0.76 | 0.75 | 0.76 | 0.76 | 0.76 | 0.72 | 0.77 | 0.71 | 0.70 | 0.70 | 0.70 | 0.61 | 0.61 | 0.61 | 0.61 | 0.56 |
| 18 | 1.00 | 0.77 | 0.76 | 0.76 | 0.77 | 0.77 | 0.72 | 0.77 | 0.71 | 0.70 | 0.70 | 0.71 | 0.61 | 0.61 | 0.61 | 0.61 | 0.57 |
| 19 | 0.77 | 1.00 | 1.00 | 0.95 | 1.00 | 1.00 | 0.74 | 0.95 | 0.73 | 0.72 | 0.70 | 0.72 | 0.62 | 0.62 | 0.62 | 0.62 | 0.59 |
| 20 | 0.76 | 1.00 | 1.00 | 0.95 | 1.00 | 1.00 | 0.73 | 0.95 | 0.71 | 0.70 | 0.70 | 0.71 | 0.62 | 0.62 | 0.62 | 0.61 | 0.58 |
| 21 | 0.76 | 0.95 | 0.95 | 1.00 | 0.95 | 0.95 | 0.74 | 0.99 | 0.72 | 0.71 | 0.72 | 0.72 | 0.63 | 0.63 | 0.63 | 0.62 | 0.59 |
| 22 | 0.77 | 1.00 | 1.00 | 0.95 | 1.00 | 1.00 | 0.74 | 0.95 | 0.72 | 0.71 | 0.70 | 0.72 | 0.62 | 0.62 | 0.62 | 0.62 | 0.58 |
| 23 | 0.77 | 1.00 | 1.00 | 0.95 | 1.00 | 1.00 | 0.74 | 0.95 | 0.72 | 0.71 | 0.70 | 0.72 | 0.62 | 0.62 | 0.62 | 0.62 | 0.58 |
| 24 | 0.72 | 0.74 | 0.73 | 0.74 | 0.74 | 0.74 | 1.00 | 0.73 | 0.99 | 0.99 | 0.82 | 0.99 | 0.63 | 0.63 | 0.63 | 0.63 | 0.57 |



|              | 18   | 19   | 20   | 21   | 22   | 23   | 24   | 25   | 26   | 27   | 28   | 29   | 30   | 31   | 32   | 33   | 34   |
|--------------|------|------|------|------|------|------|------|------|------|------|------|------|------|------|------|------|------|
| <b>25</b>    | 0.77 | 0.95 | 0.95 | 0.99 | 0.95 | 0.95 | 0.73 | 1.00 | 0.74 | 0.73 | 0.69 | 0.70 | 0.62 | 0.62 | 0.62 | 0.62 | 0.59 |
| <b>26</b>    | 0.71 | 0.73 | 0.71 | 0.72 | 0.72 | 0.72 | 0.99 | 0.74 | 1.00 | 1.00 | 0.83 | 0.98 | 0.64 | 0.64 | 0.64 | 0.63 | 0.57 |
| <b>27</b>    | 0.70 | 0.72 | 0.70 | 0.71 | 0.71 | 0.71 | 0.99 | 0.73 | 1.00 | 1.00 | 0.82 | 0.97 | 0.63 | 0.63 | 0.63 | 0.63 | 0.57 |
| <b>28</b>    | 0.70 | 0.70 | 0.70 | 0.72 | 0.70 | 0.70 | 0.82 | 0.69 | 0.83 | 0.82 | 1.00 | 0.80 | 0.62 | 0.62 | 0.62 | 0.62 | 0.58 |
| <b>29</b>    | 0.71 | 0.72 | 0.71 | 0.72 | 0.72 | 0.72 | 0.99 | 0.70 | 0.98 | 0.97 | 0.80 | 1.00 | 0.63 | 0.63 | 0.63 | 0.63 | 0.57 |
| <b>30</b>    | 0.61 | 0.62 | 0.62 | 0.63 | 0.62 | 0.62 | 0.63 | 0.62 | 0.64 | 0.63 | 0.62 | 0.63 | 1.00 | 1.00 | 1.00 | 1.00 | 0.62 |
| <b>31</b>    | 0.61 | 0.62 | 0.62 | 0.63 | 0.62 | 0.62 | 0.63 | 0.62 | 0.64 | 0.63 | 0.62 | 0.63 | 1.00 | 1.00 | 1.00 | 1.00 | 0.62 |
| <b>32</b>    | 0.61 | 0.62 | 0.62 | 0.63 | 0.62 | 0.62 | 0.63 | 0.62 | 0.64 | 0.63 | 0.62 | 0.63 | 1.00 | 1.00 | 1.00 | 1.00 | 0.62 |
| <b>33</b>    | 0.61 | 0.62 | 0.61 | 0.62 | 0.62 | 0.62 | 0.63 | 0.62 | 0.63 | 0.63 | 0.62 | 0.63 | 1.00 | 1.00 | 1.00 | 1.00 | 0.62 |
| <b>34</b>    | 0.57 | 0.59 | 0.58 | 0.59 | 0.58 | 0.58 | 0.57 | 0.59 | 0.57 | 0.57 | 0.58 | 0.57 | 0.62 | 0.62 | 0.62 | 0.62 | 1.00 |
| <b>35</b>    | 0.60 | 0.61 | 0.61 | 0.62 | 0.61 | 0.61 | 0.63 | 0.63 | 0.62 | 0.62 | 0.63 | 0.61 | 0.78 | 0.78 | 0.78 | 0.78 | 0.63 |
| <b>36</b>    | 0.61 | 0.62 | 0.61 | 0.62 | 0.62 | 0.62 | 0.62 | 0.62 | 0.62 | 0.62 | 0.60 | 0.61 | 0.75 | 0.75 | 0.75 | 0.74 | 0.60 |
| <b>37</b>    | 0.60 | 0.62 | 0.62 | 0.62 | 0.61 | 0.61 | 0.61 | 0.62 | 0.61 | 0.61 | 0.61 | 0.61 | 0.74 | 0.74 | 0.74 | 0.74 | 0.60 |
| <b>38</b>    | 0.60 | 0.62 | 0.62 | 0.62 | 0.61 | 0.61 | 0.61 | 0.62 | 0.61 | 0.61 | 0.61 | 0.61 | 0.74 | 0.74 | 0.74 | 0.74 | 0.60 |
| <b>39</b>    | 0.58 | 0.59 | 0.57 | 0.60 | 0.58 | 0.58 | 0.60 | 0.59 | 0.60 | 0.60 | 0.58 | 0.60 | 0.64 | 0.64 | 0.64 | 0.64 | 0.71 |
| <b>40</b>    | 0.58 | 0.59 | 0.57 | 0.60 | 0.58 | 0.58 | 0.60 | 0.59 | 0.60 | 0.60 | 0.58 | 0.59 | 0.64 | 0.64 | 0.64 | 0.64 | 0.71 |
| <b>41</b>    | 0.60 | 0.61 | 0.61 | 0.61 | 0.61 | 0.61 | 0.61 | 0.61 | 0.61 | 0.61 | 0.59 | 0.60 | 0.73 | 0.73 | 0.73 | 0.73 | 0.59 |
| <b>42</b>    | 0.60 | 0.61 | 0.62 | 0.61 | 0.61 | 0.61 | 0.61 | 0.61 | 0.61 | 0.61 | 0.60 | 0.61 | 0.74 | 0.74 | 0.74 | 0.74 | 0.59 |
| <b>43</b>    | 0.58 | 0.58 | 0.57 | 0.60 | 0.58 | 0.58 | 0.60 | 0.59 | 0.60 | 0.59 | 0.57 | 0.59 | 0.64 | 0.64 | 0.64 | 0.64 | 0.71 |
| <b>44.00</b> | 0.58 | 0.59 | 0.57 | 0.60 | 0.58 | 0.58 | 0.59 | 0.59 | 0.59 | 0.59 | 0.57 | 0.59 | 0.65 | 0.65 | 0.65 | 0.65 | 0.72 |
| <b>45.00</b> | 0.57 | 0.58 | 0.56 | 0.59 | 0.58 | 0.58 | 0.59 | 0.58 | 0.60 | 0.59 | 0.57 | 0.59 | 0.64 | 0.64 | 0.64 | 0.64 | 0.72 |
| <b>46.00</b> | 0.57 | 0.58 | 0.56 | 0.59 | 0.57 | 0.57 | 0.59 | 0.58 | 0.60 | 0.59 | 0.57 | 0.59 | 0.64 | 0.64 | 0.64 | 0.64 | 0.72 |
| <b>47.00</b> | 0.57 | 0.58 | 0.56 | 0.59 | 0.57 | 0.57 | 0.59 | 0.58 | 0.60 | 0.59 | 0.57 | 0.59 | 0.64 | 0.64 | 0.64 | 0.64 | 0.72 |

|                         | 18   | 19   | 20   | 21   | 22   | 23   | 24   | 25   | 26   | 27   | 28   | 29   | 30   | 31   | 32   | 33   | 34   |
|-------------------------|------|------|------|------|------|------|------|------|------|------|------|------|------|------|------|------|------|
| <b>48.0</b><br><b>0</b> | 0.57 | 0.58 | 0.57 | 0.59 | 0.58 | 0.58 | 0.59 | 0.58 | 0.59 | 0.59 | 0.57 | 0.59 | 0.64 | 0.64 | 0.64 | 0.65 | 0.72 |
| <b>49.0</b><br><b>0</b> | 0.57 | 0.58 | 0.57 | 0.59 | 0.58 | 0.58 | 0.59 | 0.58 | 0.59 | 0.59 | 0.57 | 0.59 | 0.64 | 0.64 | 0.64 | 0.65 | 0.72 |
| <b>50.0</b><br><b>0</b> | 0.59 | 0.60 | 0.58 | 0.61 | 0.59 | 0.59 | 0.61 | 0.61 | 0.61 | 0.60 | 0.60 | 0.60 | 0.66 | 0.66 | 0.66 | 0.67 | 0.66 |



|    | 35   | 36   | 37   | 38   | 39   | 40   | 41   | 42   | 43   | 44   | 45   | 46   | 47   | 48   | 49   | 50   |
|----|------|------|------|------|------|------|------|------|------|------|------|------|------|------|------|------|
| 25 | 0.63 | 0.62 | 0.62 | 0.62 | 0.59 | 0.59 | 0.61 | 0.61 | 0.59 | 0.59 | 0.58 | 0.58 | 0.58 | 0.58 | 0.58 | 0.61 |
| 26 | 0.62 | 0.62 | 0.61 | 0.61 | 0.60 | 0.60 | 0.61 | 0.61 | 0.60 | 0.59 | 0.60 | 0.60 | 0.60 | 0.59 | 0.59 | 0.61 |
| 27 | 0.62 | 0.62 | 0.61 | 0.61 | 0.60 | 0.60 | 0.61 | 0.61 | 0.59 | 0.59 | 0.59 | 0.59 | 0.59 | 0.59 | 0.59 | 0.60 |
| 28 | 0.63 | 0.60 | 0.61 | 0.61 | 0.58 | 0.58 | 0.59 | 0.60 | 0.57 | 0.57 | 0.57 | 0.57 | 0.57 | 0.57 | 0.57 | 0.60 |
| 29 | 0.61 | 0.61 | 0.61 | 0.61 | 0.60 | 0.59 | 0.60 | 0.61 | 0.59 | 0.59 | 0.59 | 0.59 | 0.59 | 0.59 | 0.59 | 0.60 |
| 30 | 0.78 | 0.75 | 0.74 | 0.74 | 0.64 | 0.64 | 0.73 | 0.74 | 0.64 | 0.65 | 0.64 | 0.64 | 0.64 | 0.64 | 0.64 | 0.66 |
| 31 | 0.78 | 0.75 | 0.74 | 0.74 | 0.64 | 0.64 | 0.73 | 0.74 | 0.64 | 0.65 | 0.64 | 0.64 | 0.64 | 0.64 | 0.64 | 0.66 |
| 32 | 0.78 | 0.75 | 0.74 | 0.74 | 0.64 | 0.64 | 0.73 | 0.74 | 0.64 | 0.65 | 0.64 | 0.64 | 0.64 | 0.64 | 0.64 | 0.66 |
| 33 | 0.78 | 0.74 | 0.74 | 0.74 | 0.64 | 0.64 | 0.73 | 0.74 | 0.64 | 0.65 | 0.64 | 0.64 | 0.64 | 0.65 | 0.65 | 0.67 |
| 34 | 0.63 | 0.60 | 0.60 | 0.60 | 0.71 | 0.71 | 0.59 | 0.59 | 0.71 | 0.72 | 0.72 | 0.72 | 0.72 | 0.72 | 0.72 | 0.66 |
| 35 | 1.00 | 0.75 | 0.74 | 0.74 | 0.65 | 0.65 | 0.74 | 0.74 | 0.65 | 0.65 | 0.65 | 0.65 | 0.65 | 0.65 | 0.65 | 0.65 |
| 36 | 0.75 | 1.00 | 0.98 | 0.98 | 0.63 | 0.63 | 0.97 | 0.98 | 0.63 | 0.63 | 0.63 | 0.63 | 0.63 | 0.63 | 0.63 | 0.64 |
| 37 | 0.74 | 0.98 | 1.00 | 1.00 | 0.63 | 0.63 | 0.98 | 1.00 | 0.62 | 0.63 | 0.63 | 0.63 | 0.63 | 0.62 | 0.62 | 0.63 |
| 38 | 0.74 | 0.98 | 1.00 | 1.00 | 0.62 | 0.63 | 0.98 | 1.00 | 0.62 | 0.63 | 0.63 | 0.62 | 0.63 | 0.62 | 0.62 | 0.63 |
| 39 | 0.65 | 0.63 | 0.63 | 0.62 | 1.00 | 1.00 | 0.62 | 0.62 | 1.00 | 0.92 | 0.91 | 0.91 | 0.91 | 0.92 | 0.92 | 0.71 |
| 40 | 0.65 | 0.63 | 0.63 | 0.63 | 1.00 | 1.00 | 0.62 | 0.62 | 1.00 | 0.92 | 0.91 | 0.91 | 0.91 | 0.92 | 0.92 | 0.71 |
| 41 | 0.74 | 0.97 | 0.98 | 0.98 | 0.62 | 0.62 | 1.00 | 0.98 | 0.62 | 0.62 | 0.62 | 0.62 | 0.62 | 0.62 | 0.62 | 0.63 |
| 42 | 0.74 | 0.98 | 1.00 | 1.00 | 0.62 | 0.62 | 0.98 | 1.00 | 0.62 | 0.62 | 0.62 | 0.62 | 0.62 | 0.62 | 0.62 | 0.63 |
| 43 | 0.65 | 0.63 | 0.62 | 0.62 | 1.00 | 1.00 | 0.62 | 0.62 | 1.00 | 0.92 | 0.91 | 0.91 | 0.91 | 0.92 | 0.91 | 0.71 |
| 44 | 0.65 | 0.63 | 0.63 | 0.63 | 0.92 | 0.92 | 0.62 | 0.62 | 0.92 | 1.00 | 0.93 | 0.93 | 0.93 | 0.98 | 0.98 | 0.71 |
| 45 | 0.65 | 0.63 | 0.63 | 0.63 | 0.91 | 0.91 | 0.62 | 0.62 | 0.91 | 0.93 | 1.00 | 1.00 | 1.00 | 0.93 | 0.93 | 0.71 |
| 46 | 0.65 | 0.63 | 0.63 | 0.62 | 0.91 | 0.91 | 0.62 | 0.62 | 0.91 | 0.93 | 1.00 | 1.00 | 1.00 | 0.93 | 0.93 | 0.71 |
| 47 | 0.65 | 0.63 | 0.63 | 0.63 | 0.91 | 0.91 | 0.62 | 0.62 | 0.91 | 0.93 | 1.00 | 1.00 | 1.00 | 0.93 | 0.93 | 0.71 |
| 48 | 0.65 | 0.63 | 0.62 | 0.62 | 0.92 | 0.92 | 0.62 | 0.62 | 0.92 | 0.98 | 0.93 | 0.93 | 0.93 | 1.00 | 1.00 | 0.71 |



**Figure S1. Age at Diagnostic Testing**

This figure (on the next page) shows the distribution of age of diagnostic testing among HCM patients. Age at testing is used as a proxy for age of onset, which is indicative of phenotypic severity. Black indicates all patients, while red indicates patients with variants classified “Pathogenic” by the manual classification process we used to generate our training set. Both have a similar distribution. If our manual classification process picked out the most phenotypically severe variants, we would expect the red distribution to be skewed towards the left compared to the black distribution.

### Age at testing of patients with HCM variants

1733 patients with known age (black), 212 have pathogenic variants used in training set (red)  
Not shown are 215 patients without known age, 17 have pathogenic variants used in training set

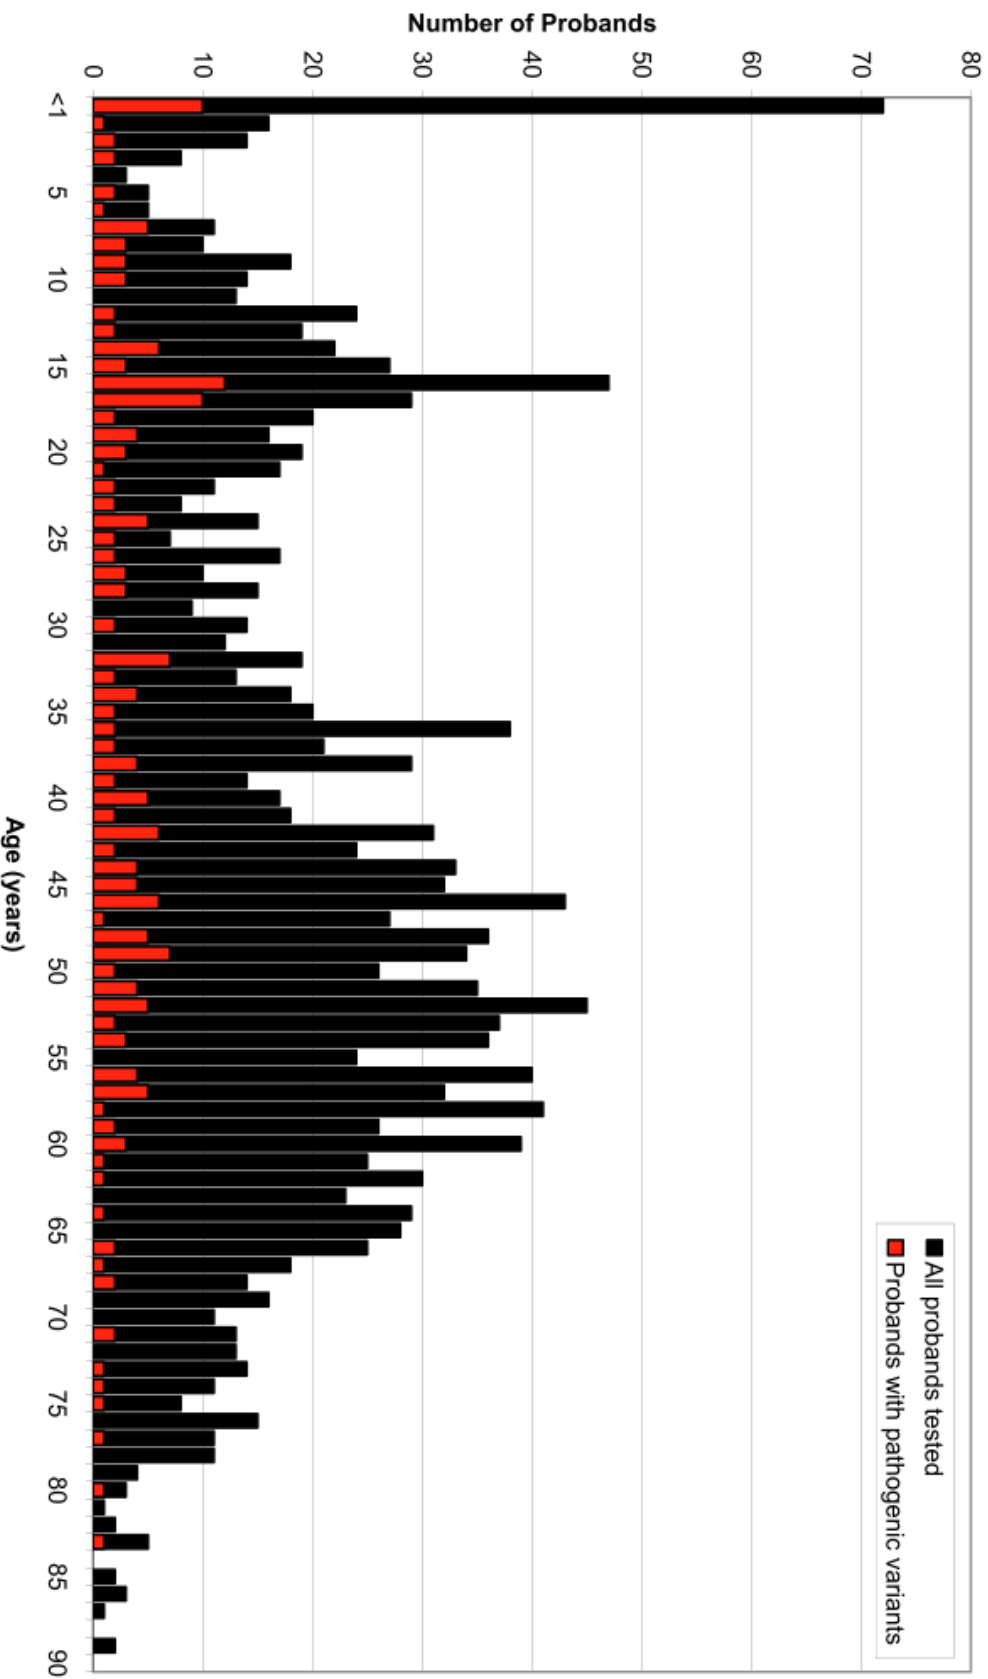

## Figure S2. MrBayes Control File

This control file was used in MrBayes to produce the MrBayes score. The file "sequences.nex" referenced in this file contains the multiple sequence alignment for the desired gene, in MrBayes Nexus file format.

```
begin mrbayes;  
  execute sequences.nex;  
  prset aamodelpr=fixed(equalin);  
  lset rates=gamma;  
  report siterates=yes;  
  mcmc ngen=1000000 filename=mybpc3_tree;  
  sump printtofile=yes;  
  sumt showtreeprobs=yes;  
end;
```



### Figure S3. Multiple Sequence Alignments

These are the three custom alignments we used, in FASTA format. The first is an alignment of MYBPC3 used with PSIC, in ClustalW format. The second and third are alignments of MYBPC3 and MYH7 used with MrBayes, in MrBayes Nexus file format. All other alignments were produced using the PolyPhen-2 alignment pipeline.

#### Alignment 1 (MYBPC3 for PSIC)

CLUSTAL W (1.83) multiple sequence alignment

```
gi|172072588|ref|NP_0 myosin binding protein C, cardiac [Danio
reri -----
-----
MPEPTKKIVSAFSSKKPKSQTAIEGARVIFEAEETKPGVKVQWQRESKDILPSHKYTI SAEDNKH
SLTINNI IQEDAVGYAVIAGMSKVFKELKIKESEVKG-----
VEKAKSPDPAAVEHKPEESKPEESKPEPEPPAPTENSAPESTGPPSDGVAPEALPESHQPDT
RQDLTGLFTEKPHSGEVNNGENIIFIARVCGESLLKKPTVKWFKGKWM DLASKSGKHLQLKEHY
DRNT-----
KVYTFEMHIIAAKANFAGAYRCEVSSRDKFDSCNFDLIVHEART-TEGFDIRTAFRRTST----
-----DAGDDSGELDFSALLKKRDSFVKTG-Q-RAVHVSTEPDVDVWDILQK-
APPSEYEKIAFQYGITDLRGMLKRLKKMKKEEKKSAAFLKKLDPAYQVEKGHKIKLEIEVANPD
AEVKWLKNGQEIHPTGS--
KYIFESVGNKRFLTINNC SLSDDAAYMCVVGDEKTVTELFVKEPPVLIVRNLEDQMAMKGD RVE
FECEVSEEGAQVKWEKDGVELTRDESFK--
YRFKKDGCKHVLIINDVTKEDCGHYRVKTNGGQSLAELMVQEKQLEVYQSIADLTVKAKDQAVF
KCEVSDENVKGIWYKNGVEVKPDARTLITHIGRIHKLTIDDVKPEDEGDYTFVPEGFAF-
NLSAKLNFLEVKIDFVPRQDPPKIHLD CMGRTAESTILVVAGNKLRLDVPITGDPAPT VIWTK-
-----
GEKVLTDSDGRVHVESTKGHCIFTIEGAERQDEGVYSVIVRN PAGEDTADINVKVVDVDPDPEA
PRILSVGEDSCVVQWDAPRFDGGQPVIGYVLERKKKKS YRWMRLNFDPYKETTFEAKKMI EGV
YEMRVYAVNAIGMSRPSAASQPFVPAAPTSEPIGLCVDDISDTTISLKWRTPERIGSAELEGY
VEYCKEG-----
SDEWIPAFSGLTERTSVIIRDLPTGEKMQFRV RAYNMAGPSAPATLQQAVTIREIMQRPKI WLP
RNLRQTLIKKVGGETINLVIPFQ-----
GKPRPQVSWTKNDEPLDPKSVSIRNSD TDTILFIRRSEKDSGKYDVQVQIENVEDKASVNIQI
V-----
DVPGPPQNLKVM DVWGFNVALEWKPPKDN GNC DITGYNIQKADKKTMEWYTVFEQYRRTNCVVS
DLIMGNEYVFRVYAANMVGLSPEPCLSKDSAYIQKTG-----
IVYKPPSYKD HDFSEAPKFTHPLKSRSVIAGYNATLSCSVRGI PKPKITWYKNKMDITNEAKYR
MFSNQGVLTLEIRKPCPF DGGVYMCKAVNDSGEDLVECKLEVRLPQVTKEDIKK-----
-----
gi|47230505|emb|CAF99 unnamed protein product [Tetraodon
nigrovirid -----
-----
MPETLKKAVSAFTKKPKTLEAAAGSSVVF EAETEKPD AKVKWQCNAKDIANGNKYTI AADGSKH
SLSIKAVTHQDANIYAVISGGSKVKFELKV-----VSKPEAP-----
ADGPEEPGVQPEQAPAASTQN-----QSVAAGPEAPP AE-----
```

--  
GQNITFVAKVNEESLLKKPSVKWFKGKWM DLASKSGKHLQLKESYDRNTKVADSQTSGNPVFLP  
AYSVFLHLVQVYTFEMQILAAKANFAGAYRCEVSSKDKFDSCNFTLTVHDVCV-  
EEGLDIRAAFRRST-----DGKEDSGELDFSTLLKKR-----  
AVHVSSEPEVDVWEILSK-  
APSEYEKIAFQHGITDLRGMLKRLKMKKEEKKSAAFLRKLDPAYQVTKGHKIRLAVEVANAD  
ADV KWLKNGQEFHPTG---  
RYIFESVGNMRYLTINNC SLADDAAYCCVVGEEKSTSELVKEPPVLIVKNLEDQMVMKGDRVE  
LECEVSEEGANVKWEKDGVELTRDESFK--  
YRFKKDGCKHILIIINDATKEDCGHYKVKTNGGESMAELLVQEKELEIYQSIADLTVKAKDQALF  
KCEVSDENVRGTWYKNGAEVKPDARINITHIGRIHKLTI DDVKPGDEGDYTFVPDGYAY-  
NLSAKLNFLEVKIDYVPRQDPPKIHLD CMGR TAESTIVVAGNKLRLDVPITGDPAPTIVWTK-  
-----

GEKVVTEGDGRVHVESTKGHCIFTIEGAERQDEGIYSVVVRNAAGEDTADINVKVVDVDPDPQE  
VKILSVGEEESC VVQWDPPAFDGGQPIIGYVLERKKKKS YRWMRLNFD PYPETTYEAKRMIEGVA  
YEMRVYAVNSIGMSRHSQASQPFVPAAPTSEPVGLCVDDISDTSIVLKW RPPPERMGSDLEGYG  
VEYCKEG-----  
TDEWIPAAQGLTERTSLIIRNLTTGDR LQFRV RAYNMAGPSPAATLAQPITIREIMQRPKILLP  
RNLRQTLIRRVGDTVNLVIPFQ-----  
GKPRPKV TWSKNGEPLSSTLASIRNSEGDTILFIRKTEKTHSGKYDLQVQIENVEDTASVTLQV  
VGRSDSRVWTSGGGSTGTLIIFLLIRVLDLPGPPEVLKIVDVWGFNVALEWKPPKDDGNCEITGY  
TVQKADKKTMEWFTVYDQYRRTHCIVSDLIMGNEYVFRV FANNLVGPSPEPCG TKDSAYIQKTG  
GQQPHVVTSSGVVYKPPTHKEHDLSEAPKFTRPLVSRSVIAGYTATLSCSVRGV PKPKVTWYKN  
KMDLSNEAKYRMLS NHGVL TLEIRKPCPF DGGVYTCKAVNDSGEDTVECKLEVR-  
QIIKEDKKEESK KETHPAA-----  
-----

gi|224051064|ref|XR\_0 PREDICTED: Taeniopygia guttata misc\_RNA  
(LOC1 -----  
-----

MPEPVKKT VSAFTKKPKTTEVTAGNTAVFEAE TEKSGIKVKWQRAGTEITESEKYVIKTEGNKH  
SLTINNVGKEDDVTYAVIAGSSKVKFELKVKE-----  
PEKSETVTPAEAVPAPAASESPAPPAESSQNT-----EVSSAETQ-----  
PEEPLDPIGLFVARPQDGEVTVGGNITFTAKVAGESLLKKPSVKWFKGKWM DLGSKVGKHLQLH  
DSYDRNT-----  
KVYTFEMEIIEANMTFAGGYRCEVSTKDKFDSSNFSLTVNEAPV-  
SGDLDIRAAFRRTSLAGGRRM TSAFLSTEGHDDGAEFNFSSLLKKRDSFLRPS-  
NRGEGKSESQSDVDVWDILRK-  
APPTEYEKIAFQYGITDLRGMLKRLKRIKKEEKKSTAF LKKLDPAYQVDKGQKIKLMVEVANPD  
ADV KWLKNGQEIQVSGS--  
KYIFEAVGNKRILTIINHCSLADDAAYECVVGDEKSFTELFVKEPPIIIHPLEDQMVMVGERVE  
FECEVSEEGATVKWEKDGIELTREETFK--  
YRFKKDGKKQYLI INESTKEDSGHYTVKTNGGVSVAELIVQEKKLEVYQSIADLTVKARDQAVF  
KCEVSDENVKGIWLKNGKEVIPDERIKISHIGRIHKLI IEDVTPEDEADYSFIPQGFAY-  
NLSAKLQFLEVKIDFVPREEPPKIHLDCLGQSPD-TIVVAGNKLRLDVPVSGDPTPTVIWQK-  
VNKRNDLLRNS-  
EDSMTPSENSSDLNTDNKLLFESEGRVVRVEMHEDHCVFIIIEGAEKEDEGVYRVILKNPVGEDKA  
DITVKVIDVDPDPPEAPTISNIGEDYCTVQWQPPKYDGGQPVLGYILERKKKKS YRWMRLNFDLL

KELTYEAKRMIEGVVYEMRIYAVNSIGMSRSPASQPFMPIAPPSEPTHTFTVEDVSDSTVSLKW  
RPPERIGAGGLDGYMVEYCKDG-----

STEWIPALPGLTERTSALIKDLVTGDKLYFRVKAVNLAGESSGAATIKEPVTVQEILQRPKFWLP  
RQLRQTLVKKVGETINIVIPFQ-----

GKPRPKITWLKDGQTLDSKDVGIRNSNTDTILFIRKAELHHS GAYEVTLQIENMSDKVAITIQI  
I-----

DKPGPPQNIKLVDVWGFNAALEWTPPQDDGNAQILGYTVQKADKKTMEWYTVFDHYRRTNCIVS  
DLIMGNEYFFRIFSENLCGLSETAATTKNPAHIQKTG-----

TTYKPPCYKEHDFSEAPKFTHPLVNRSVIAGYNTTLCSCAVRGIPKPKIFWFKNKMDLSGDAKYR  
MFSKQGVLTLEIRKPTPFDDGGIYTCKAVNECGEAEIECRLDVRGNQMNPMDNPNKAMKRVMS-

-----  
sp|Q90688|MYPC3\_CHICK Myosin-binding protein C, cardiac-type  
OS=Gal -----  
-----

MPEPAKKAVSAFTKKPKTTEVAAGSTAVFEAEOTEKGTGKVKWQRAGTEITDSEKYAIKAEGNKH  
SLTISNVGKDDEVTYAVIAGTSKVKFELKVKE-----

PEKSEPVAPAEASPAPAASELPAPPVESNQNP-----EVPPAETQ-----

PEEPVDP IGLFVTRPQDGEVTVGGNITFTAKVAGESLLKKPSVKWFKGKWM DLASKVGHKLQLH  
DNYDRNN-----

KVYTFEMEIIEANMTFAGGYRCEVSTKDKFDSSNFNLIVNEAPV-

SGEMDIRAAFRRTSLAGGRRMTSAFLSTEGLEESGELNFSALLKKRDSFLRTA-

NRGDGKSDSQPDVDVWEILRK-

APPSEYEKIAFQYGITDLRGMLKRLKRIKKEEKKSTAFLLKLDPAYQVDKGQKIKLMVEVANPD  
ADVWKLKNGQEIQVSGS--

KYIFEAIGNKRIL TINHCSLADDAAYECVVAEEKSFTTELFVKEPPI LITHPLEDQMMVGERVE  
FECEVSEEGATVKWEKDGVELTREETFK--

YRFKKDGKKQYLI INESTKEDSGHYTVKTNGGVSVAELIVQEKKLEVYQSIADLTVKARDQAVF  
KCEVSDENVKGIWLKNGKEVVPDERIKISHIGRIHKLTI EDVTPGDEADYSFIPQGFAY-

NLSAKLQFLEVKIDFVPREPPKIHLDC LGQSPD-TIVVVAGNKLRLDVPISGDPTPTVIWQK-  
VNKKGELVHQSNEDSLTPSENSDLSTDSKLLFESEGRVVRVEKHEDHCVFII EGAEKEDEGEVYR

VIVKNPVGEDKADITVKVIDVDPPEAPKISNIGEDYCTVQWQPPTYDGGQPVLGYILERKKKK  
SYRWMRLNFDLLKELTYEAKRMIEGVVYEMRIYAVNSIGMSRSPASQPFMPIAPPSEPTHTFTV

EDVSDTTVALKWRPPERIGAGGLDGYIVEYCKDG-----

SAEWTPALPGLTERTSALIKDLVTGDKLYFRVKAINLAGESGAATIKEPVTVQEIMQRPKICVP  
RHLRQTLVKKVGETINIMIPFQ-----

GKPRPKISWMKDGQTLDSKDVGIRNSSTDTILFIRKAELHHS GAYEVTLQIENMTDTVAITIQI  
I-----

DKPGPPQNIKLADVWGFNVALEWTPPQDDGNAQILGYTVQKADKKTMEWYTVYDHYRRTNCVVS  
DLIMGNEYFFRVFSENLCGLSETAATTKNPAYIQKTG-----

TTYKPPSYKEHDFSEPPKFTHPLVNRSVIAGYNTTLCSCAVRGIPKPKIFWYKNKVDLSGDAKYR  
MFSKQGVLTLEIRKPTPLDGGFYTCKAVNERGEAEIECRLDVRVPQ-----

-----  
tr|A9JTS4|A9JTS4\_XENT Mybpc3 protein OS=Xenopus tropicalis  
GN=mybpc -----  
-----

-----MPEPVKK--

SAFTKKPKSEEVS VGGT VTFAAETDKPGLKVKWQRNNVDITANERFAIKSEGKQHS LTI SNATA  
EDEVVYAVIAGTSKVKFELKVKE-----QEKTE-

EAPAPAPAAPEASEAPAPPAPDSSAPPPTETAEGEAKPPESAEATAIQ-----  
PEPPKDEIGLFLERPKDAEITVGSNIKFTARIAGANLIKPPVVKWFKGKWMDLTSKVGKHLQLH  
EIYDRNT-----  
KIYTFEIQIIQAKTTYAGGYRCEVSSKDKFDSCNFNLAVHEVST-SGEVDIRAAFRRRTG-----  
-----DGAE EAGELDFSALLKKRD-----NEPKQGAEPDQVVDVWDILKK-  
APPSEYEKIAFQYGITDLRGLLKRLLKMKKEEKKSEAFLLKMDPAYQIDKGQKMKLVVEVANPD  
AEVKWLKNGQEIRVSGS--  
KYIFESIGNKRILTINNC SLADDAAYQC VIGEEKCFTELFVREPPVQILHSLEDQMVMVGERVE  
FECEVSEEGAQVKWEKDGVELTREETFK--  
YRFKKDGKHHFLIINETTLEDGGNYKVKTNNGGESVAELMVQEKQLEVLQDVADLTVKAKEQAVF  
KCEVSDETVTGIWVKNGKEVIPNNRIKITHIGRVHKLTI DDVVPQDEGDYSFIPNGFAF-  
SLSAKLHFMEVKIDFVPRQEPPKIKLDCMSQCAD-TIIVVAGNKLRLDVPI SGPAPT VVWVK-  
GDK-----  
LISEVDGRVHVETHADHCVFIIIEGAEKSDGAYTVLVKNEAGEDKANINVKVIEVDPDPESPKI  
SNIGEDFCTVQWDPKPYDGGQPV LGYILERKKKSYRWMRLNYDLVKELTYESKRMIIEGVVYEM  
RIYAVNSIGMSLPSQPSQPFMPIAPTSEPTQLVVEDVSDTSSISLKW RPPERIGAGGLDGYTVEY  
CKEG-----  
STEWVPALQGLTERNSVMIRDLPTGERLTFRVRAINLAGPSEPTMKEPVTIREIMQRPKIWL P  
RYLRQKLIKKVGETVNIVIPFQ-----  
GKPRPVVTLKDGQPVDPKQVGI RNSEADTILFIRKAERDHSGEYKVQIQIENCEDSATI CIQI  
V-----  
DKPSASQKLVKIVEIWGFNVALEWAPPQDDGNT EITGYTVQKADKKTMEWFTVFEHYRRTHCVVS  
DLIMGNEY YFRVFSENMCGLSEK PCTTKNSAYIQKTG-----  
TAYKPPTYKDHEFDEAPKFTHPLNDRSVVAGYNATLSCAVRGIPKPKITWYKNKMDLSMEARYR  
SFSKQGVLTLEVRKPSPF DGGLYTCKAVNEHGVAETECRLEVRVPQ-----  
-----  
tr|A8MXZ9|A8MXZ9\_HUMA Putative uncharacterized protein MYBPC3  
OS=Ho -----  
-----  
MPEPGKKPVSAFSSKPRSVEVAAGSPAVFEAETERAGVKVRWQRGGSDI SASNKYGLATEGTRH  
TLTVREVGPADQGSYAVIAGSSKVKFDLKVIE-----AEKAEPML-----  
APAPAPAEATGAPGEAPAPAAELGESAPSPKGSSSAALNGPT----  
PGAPDDPIGLFVMRPQDGEVTVGGSITFSARVAGASLLKPPVVKWFKGKVVLDLSSKVGQHLQLH  
DSYDRAS-----  
KVYLFELHITDAQPAFTGSYRCEVSTKDKFDSCNFNLTVHEAMG-  
TGDLDLLSAFRRTSLAGGRRIS-----DSHEDTGILDFSSLLKKSSSFRT P----  
RDSKLEAPAEEDVWEILRQ-  
APPSEYERIAFQYGVTDLRGMLKRLKGMRRDEKKSTAFQKKLEPAYQVSKGHKIRLTVELADHD  
AEVKWLKNGQEIQMSG S--  
KYIFESIGAKRTLTISQCSLADDAAYQC VVGGEEKCSTELFVKEPPVLITRPLEDQLVMVGQRVE  
FECEVSEEGAQVKWLKDGVELTREETFK--  
YRFKKDQRRHHLIINEAMLEDAGHYALCTSGGQALAE LIVOEKKLEVYQSIADLMVGAKDQAVF  
KCEVSDENVRGVWLKNGKELVPDSRIK VSHIGRVHKLTI DDVTPADEADYSFVPEGFAC-  
NLSAKLHFMEVKIDFVPRQEPPKIHLD CPGRI PD-  
TIIVVAGNKLRLDVPI SGPAPT VVIWQKAITQGNKAPARPAPDAPEDTGDSDEWVFDKLLCET  
EGRVRVETTKDRSIFTVEGAEKEDEGVYTVTVKNPVGEDQVNLT VKVIDVPDAPAAPKISNVGE  
DSCTVQWEPPAYDGGQPI LGYILERKKKSYRWMRLNFDLIQELSHEARRMIIEGVVYEMRVYAV

NAIGMSRSPASQPFMPIGPPSEPTHLAVEDVSDTTVSLKWRPPERVGAGGLDGYSVEYCPEG-

-----  
CSEWVAALQGLTEHTSILVKDLPTGARLLFRVRAHNMAGPGAPVTTTEPVTVQEILQRPRLQLP  
RHLRQTIQKKVGEVNNLLIPFQ-----

GKPRPQVTWTKEGQPLAGEEVSIRNSPTDTILFIRAARRVHSGTYQVTVRIENMEDKATLVLQV  
V-----

DKPSPPPQDLRVTDAGLNVALEWKPPQDVGNTLWGYTVQKADKKTMEWFTVLEHYRRTHCVVP  
ELIIGNGYFRVFSQNMVGFSDRAATTKEPVFI PRPG-----

ITYEPPNYKALDFSEAPSFTQPLVNRSVIAGYTAMLCCAVRGSPKPKISWFKNGLDLGEDARFR  
MFSKQGVLTLEIRKPCPFDDGGIYVCRAATNLQGEARCECRLEVRVPQ-----

-----  
gi|114637607|ref|XP\_5 PREDICTED: protein C, cardiac [Pan  
troglodyte -----  
-----

MPEPGKKPVSAFSSKPRSVEVAAGSPAVFEAETERAGVKVRWQRGGSDISASNKYGLATEGTRH  
TLTVREVGPADQGSYAVIAGSSKVKFDLKVIE-----AEKAEPML-----

APAPAPAEATGAPGEAPAPAAELGESAPSPKGSSSAALNGPT----

PGAPDDPIGLFVMRPQDGEVTVGGSITFSARVAGASLLKPPVVKWFKGKWVDLSSKVGQHLQLH  
DSYDRAS-----

KVYLFELHITDAQPAFAGGYRCEVSTKDKFDCSNFNLTVHEAMG-TGDLDLLSAFRRT-----  
-----DSKLEAPAEEDVWEILRQ-

APPSEYERIAFQYGVTDLRGMLKRLKGMRRDEKKS-----

TEACLLPLSTCVSLTRFPATSLR-----PPP--

RYIFESIGAKRTLTIISQCSLADDAAYQCVMGGEKCESTELFVKEPPVLI TRPLEDQLVMVGQRVE  
FECEVSEEGAQVKWLKDGVELTREETFK--

YRFKKDGRRHHLIINEATLEDAGHYALCTSGGQALAEIVQEKKLEVYQSIADLMVGAKDQAVF  
KCEVSDENVRGVWLKNGKELVPDSRIKVVSHIGRVHKLTI DDVTPADEADYSFVPEGFAC-

NLSAKLHFMEVKIDFVPRQEPPKIHLDCPGRI PD-

TIVVVAGNKLRLDVPI SGDPAPTIVIQKAITQGNKAPARPAPDAPEDTGDSDEWVFDKLLCET  
EGRVRVETTKDRSIFTVEGAKEKEDEGVYTVTVKNPVGEDQVNLTVKVIDVPDAPAAPKISNVGE

DSCTVQWEPPAYDGGQPILGYILERKKKSYRWMRLNFDLIQELSHEARRMIEGVVYEMRVYAV  
NAIGMSRSPASQPFMPIGPPSEPTHLAVEDVSDTTVSLKWRPPERVGAGGLDGYSVEYCPEG-

-----  
CSEWVAALQGLTEHTSILVKDLPTGARLLFRVRAHNMAGPGAPVTTTEPVTVQEILQRPRLQLP  
RHLRQTIQKKVGEVNNLLIPFQ-----

GKPRPQVTWTKEGQPLAGEEVSIRNSPTDTILFIRAARRVHSGTYQVTVRIENMEDKATLVLQV  
V-----

DKPSPPPQDLRVTDAGLNVALEWKPPQDVGNTLWGYTVQKADKKTMEWFTVLEHYRRTHCVVP  
ELIIGNGYFRVFSQNMVGFSDRAATTKEPVFI PRPG-----

ITYEPPNYKALDFSEAPSFTQPLVNRSVIAGYTAMLCCAVRGSPKPKISWFKNGLDLGEDARFR  
MFSKQGVLTLEIRKPCP-----

-----  
gi|109106380|ref|XR\_0 PREDICTED: Macaca mulatta protein C,  
cardiac -----  
-----

MPEPGKKPVSAFSSKPRSVEVAAGSPAVFEVETERAGVKVRWQRGGSDIGASSKYGLATEGTRH  
TLTVREVGPADQGSYAVIAGSSKVKFDLKVTE-----AEKAEPVL-----

APAPAPAEATGTPGETLAPAAELGESAPSPEGSSSAARNPT----  
PGAPDDPIGLFVMRPQDGEVTVGGSSITFSARVAGASLLKPPVVKWFKGKWVDLSSKVGQHLQLH  
DSYDRAS-----  
KVYLFELHITDAQPAFTGGYRCEVSTKDKFDCSNFNLTVHEAVG-  
TGDLDLLSSFRRTSLAGGRRIS-----DSHEDAGILDFSSLLKKSSSFRTF----  
RDSKLEAPAEEDVWEILRQ-  
APPSEYERIAFQYGVTDLRGMLKRLKGMRRDEKKSTAFQKKLEPAYQVSKGHKIRLTVELADPD  
AEVKWLKNGQEIQMSGs--  
KYIFESIGAKRTLTISQCSLADDAAYQCVVGGKECSTELFVKEPPVLITRPLEDQLVMVGQRVE  
FECEVSEEGAQVKWLKDGVELTREETFk--  
YRFKKDGRRHRLIINEATLEDMGHYALRTSGGQALAEELIVQEKKLEVYQSIADLTVGAKDQAVF  
KCEVSDENVRGVWLKNGKELVPDSRIKVSHIGRVHKLTI DDVTPADEADYSFVPEGFAC-  
NLSAKLHFMEVKIDFVPRQEPPKIHLDCPGRIPD-  
TIVVVAGNKLRLDVPI SGDPAPTIVIQKAITQGNKSPARPAPDAPEDAGDSDEWVFDKLLCET  
EGRVRVETTKDRSIFTVEGAKEKEDEGVYTVTVKNPVGEDRVNLTVKVIDVPDAPAAPKVS NVGE  
DSCTVQWEPPAYDGGQPV LGYILERKKKKS YRWMRLNFDLIQELSHEARRMIEGVVYEMRVYAV  
NAIGMSRSPASQPFMPIGPPSEPHLAVEDASD TTVSLKWRPPERV GAGGLDGY SVEYCPEGG  
E-----  
CSEWVAALRGLTEHTSILVKDLPTGARLLFRVRAHNMAGPGAPVTTTEPVTVQEILQRPRQLQP  
RHLRQTIQKKVREPVNLLIPFQLFLPSGQPRPQVTWTKEGQPLA-----  
ARR-----  
-----  
-----  
-----  
-----  
-----

tr|Q2Q1P6|Q2Q1P6\_CANF Cardiac myosin binding protein C OS=Canis  
fam -----  
-----

MPEPGKKPVSAFSSKPRSAEVAAGSPAVFEAETERSGVKVRWQRGGSDISASDKYGLAAEGTRH  
TLTVRDVGPADQGSYAVIAGSSKVKFDLKVIE-----  
AEKAETVPGPASVPAPAPAPAEAPGAPGEALASATEEKGGSSSPEGSSSAAPDG-----  
SGAPDDPIGLFVMRPQDGEVTVAGGSITFSARVAGASLLKPPVVKWFKGKWVDLSSKAGQHLQLH  
SSYDRTS-----  
KVYLFELHITDAQPTSAGGYRCEVSTKDKFDCSNFNLTVHEAVG-  
PGDLDLRSFRRTSLAGSRRIS-----DSHEDAGTLDFSSLLKKRDSFR-----  
RDSRLEAPAEEDVWEILRQ-  
ASPSEYERIAFQHGVTDLRGMLKRLKGMKRDEKKSTAFQKKLEPAYQVSKGHKIRLTVELADPD  
ADVWLKNGQEIQMSGs--  
KYIFESVGA KRTLTISQCSLADDAAYQCVVGGKECSTELFVKEPPVLITRPLEDQLVMVGQRVE  
FECEVSEEGAQVKWLKDGVELTREETFk--  
YRFKKDGRRHRLIINEATLEDAGHYALRTSGGQALAEELIVQEKKLEVYQSIADLTVGAKDQAVF  
KCEVSDENVRGVWLKNGKELVPDSRIKVSHIGRVHKLTI DDVTPADEADYSFVPEGFAC-  
NLSAKLHFMEVKIDFVPRQEPPKIHLDCPGRKPD-  
TIVVVAGNKLRLDVPI SGDPAPTIVIQKAITITQKNKVPAGPAPDASGDAAASDEWVFDKLLCET  
EGRVRVETTKDRSIFTVEGAKEKEDEGVYVTVKNPVGEDQVNLTVKVIDVPDAPAAPKIS NVGE  
DSCTVQWEPPAYDGGQPV LGYILERKKKKS YRWMRLNFDLLRELSHEARRMIEGVVYEMRVYAV

NAIGMSRSPASQPFMPIGPPSEPTHLAVEDVTDTTVSLKWRPPERAGAGGLDGYSVEYCRED-

-----

CSEWVTALQGLTEHTAVLVKDLPTGARLQFRVRAHNMAGPGAPVTTQEPVTVQEILQRPRLQLP  
RHLRQTIQRKVGEFVNLLIPFQ-----

GKPRPQVTWTKEGQPLAGEEVSIRNSPTDTILFIRAAHRAHSGTYQVMLRIENMEDKATLVLQI  
V-----

DKPSPPQDIRVAEAWGFNVALEWKPPQDYGNTEIWGYTVQKADTKTMEWFTVLEHYRRTHCVVS  
ELIIGNGYFRVFSHNMVGPDKAATTKEPVFI PRPG-----

ITYEPSYKALDFSEAPSFTRPLVNRSVIAGYNATLCCAVRGSPKPKISWFKNGLDLGKDARFR  
MFSKQGVLTLEIRKPCPFDDGGIYVCRAINLQGEAQCECRLEVR-----VPQ-----

-----

gi|194217890|ref|XP\_0 PREDICTED: similar to cardiac myosin  
binding -----

-----

MPEPGKKPVSAFSSKPRSAEVAAGSPAVFEAETERAGLKVRWQRAGSDISASDKYGLAAEGTRH  
TLTVRDVGPADQGSYAVIAGSSKVKFDLKVIE-----PEKTEPVP-----

SPAPTAEAPGAPREALASATEAEGGSPSEGGSSSAAPDG-----

PGAPDDPIGLFVMRPQDGEVTVGGSI TFSARVAGASLLKPPMVKWFKGKVVLDLSSKVGQHLQLH  
DSYDRAS-----

KVYLFELHITDAQATFTGGYRCEVSTKDKFDSNFNLTVHEAIG-PGDLDLRSAFRRT-----  
-----DSRLEAPAEEDVWEILRQ-

APPSEYERIAFQHGITDLRGMLKRLKGMRRDEKKSTAFQKKLEPAYQVSKGHKIRLTVELANPD  
AEVKWLKNGQEI QMSGS--

KYIFESIGAKRTLTISQCSLADDAAYQCVVGGKECSTELFVKEPPVLI TRPLEDQLVMVGQRVE  
FECEVSEEGAQVKWLKDGVELTREETFK--

YRFKKGQRHHLI INEATLEDAGHYALHTSGGQALAE LIVQEKKLEVYQSIADLTVGAKDQAVF  
KCEVSDENVRGVWLKNGKELVPDSRIKVVSHIGRVHKLTI DDVTPADEADYSFVPEGFAS-

NLSAKLHFMEVKIDFVPRQEPPKIHLDCPGRVPD-

TIVVAGNKLRLDVPI SGPAPT VTWQKTITQGNKVPAGPAPDAPGDAGASDEWVFDKLLCET  
EGRVRVETTKDRSVFTLEGAEKEDEGVYIVTVKNPVGEDQVNLTVKVIDVPDAPAAPKISNVGE

DSCTVQWEPPAYDGGQPI LGYILERKKKSYRWMRLNFDLLRELSLEAKRMIEGVVYEMRVYAV  
NAIGMSRSPASQPFMPIGPPSEPTHLAVEDVSDTTVSLKWRPPERVAGAGGLDGYSVEYCREG-

-----

GSEWVAALQGLTEHTSLLVKDLPTGARLLFRVRAHNVAGPGAPVTTKEPVTVQEILQRPRLQLP  
RHLRQTIHRRVGEFVNLLIPFQ-----

GRPRPQVTWTKEGQPLAGEEVSIRNSPTDTILFIRAAARTHSGTYQVTLRIENMEDEATLVLQI  
V-----

DKPSPPQDIRVAEAWGFNVALEWKPPQDDGNTEIWGYTVQKADKKTMEWFTVLEHYRRTHCVVS  
ELIIGNGYFRVFSHNMVGPDKAATTKEPVFI PKAG-----

ITYESPSYKALDFLEAPSFTRPLVNRSVIAGYNATLSCAVRGSPKPNISWFKNGLDLRDDARFR  
TFSKQGLLTLEIRKPCPFDDGGIYVCRA TNLQGEAQCECRLEVRGVKAQVGAPSSGQFPPEEQPPG

GPEVP-----

tr|Q0VD56|Q0VD56\_BOVI Myosin binding protein C, cardiac OS=Bos  
taur -----

-----

MPEPGKKPVSAFSSKPRSAEVAAGSSAVFEAETERAGLKVRWQRAGSDISASDKYSLAAEGTRH  
TLTVRDVGPADQGSYAVIAGSSKVKFDLKVVD-----AGKAEPVS-----

APAPAPTEAPGAPGEAPTSAPEVEAGAPSPPESSSAAPEG-----  
PSAPGDP IGLFVMRPQDGEVTVGGTITFSARVAGASLLKPPVVKWFKGKWVDLSSKVGQHLQLH  
DSYDRTS-----  
KVYLFELRIMDAQTTFAGGYRCEVSTKDKFDSCNFNLTVHEAVG-  
PGDVDLRSTFRRTSLAGGSRRIS-----DSHEDAGTLD FSSLLRKSS----L-----  
RTPRLEAPAEEDVWEILRQ-  
APPSEYERIAFQHGVTDLRGMLKRLKGIKRDEKKSTAFQKKLQPAYQVSKGHKIRLMVELADPD  
AEVKWLKNGQEIQMSG--  
KYIFESIGAKRTLTI SQCSLADDAAYQC VVGGEK CSTELFVKEPPVLI TRPLEDQLVMVGORVE  
FECEVSEEGAQVKWLKDGVELTREETFK--  
YRFKKDGQKHHLI INEATLEDAGHYALRTSGGQALAE LIVQEKKLEVYQSIADLTVGSKDQAVF  
KCEVSDENVRGVWLKNGKELVPDSRIKVSHIGRVHKLTI DDVTPADEADYSFVPEGFAC-  
NLSAKLHFMEVKIDFVPRQEPPKIHLDCPGRVPD-  
TIVVVAGNKLRLDVPI SGPAPT VIWQKAITKGNKVPAGPAPDASEESGAGDEWVFDKLLCET  
EGRVRVETTKDRSIFTVEGAEREDEGVYVTVKNPVGEDQVSLTVKVIDVPDAPAAPEISKVGE  
DSCTVCWEPPAYDGGQPVLYILERKKKSYRWMRLNFDLLRELSHEARRMIEGVIYEMRVYAV  
NAVGMSRPSPASQPFMPIGPPSEPHLAVEDISDTTVSLKWRPPERAGAGGLDGY SVEYRREGS  
-----  
GSAWVSALPGLIERTSLLVKDLPTGARVLFVRVRAHNLAGAGPPVTTKEPVTVQELLQRPRLQLP  
RHLRQTIQKKVGEPVNLLIPFQ-----  
GKPRPQVTWTKEGQPLAGEEVSIRNSPTDTILFIRAAHRAHSGTYQVTLRVEDMEDKAQLVLQV  
V-----  
DKPSPQDIQVAEAWGFNVALEWKPPQDDGNTLWGYTVQKADKKTMEWFTVLEHYRHTHCVVS  
ELIIGNSYFRVFSHNTVGPSDTAATTKEPVLI PRPG-----  
ITYELPKYKALDFSEAPSFTRPLVNRSVIAGYNTTLC CAVRGS PKPKISWFKNGLDLGKDARFR  
MFSKQGVLTLEIRKPCPF DGGIYACRATNLEGEAQCECRLEVRVPQ-----  
-----  
gi|157824043|ref|NP\_0 myosin binding protein C, cardiac [Rattus  
nor -----  
-----  
MPEPGKRPVSAFTKKPRSVEVTAGSAAVFEAETERSGLKVQWQRDGS DIAANDKYGLAAEGKRH  
TLTVRDVGPDDQGSYAVIAGSSKVKFDLKVTE-----PAPPEKAES-----  
AVAPTSMEAPETPKEVPALATQLEGNVSSPEGSVSVTQDGSVAGS-  
QGAPDDPIGLFLMRPQDGEVTVGGSI VFSARVAGASLLKPPVVKWFKGKWVDLSSKVGQHLQLH  
DSYDRAS-----  
KVYLFELHITDAQATSAGGYRCEVSTKDKFDSCNFNLTVHEAIG-  
SGDLDLRSFRRTSLAGTGRRTS-----DSHEDAGTLD FSSLLKK-SSFR-----  
RDSKLEAPAEEDVWEILRQ-  
APPSEYERIAFQHGVTDLRGMLKRLKGMKHDEKKSTAFQKKLEPAYQVNKGHKIRLTVELADPD  
AEVKWLKNGQEIQMSG---  
RYIFESIGAKRTLTI SQCSLADDAAYQC VVGGEK CSTELFVKEPPVLI TRSLEDQLVMVGORVE  
FECEVSEEGAQVKWLKDGVELTREETFK--  
YRFKKDGRKHHLI INEATLEDAGHYAVRTSGGQALAE LIVQEKKLEVYQSIADLAVGAKDQAVF  
KCEVSDENVRGVWLKNGKELVPDNRIKVSHIGRVHKLTI DDVTPADEADYSFVPEGFAC-  
NLSAKLHFMEVKIDFVPRQEPPKIHLDCPGSTPD-  
TIVVVAGNKLRLDVPI SGPAPT VIWQKTITQGKKASAGPPP GAPEDAGADEEWVFDKLLCET  
EGRVRVETTKDRSVFTVEGAEKEDEGVYTVTVKNPVGEDQVNLTVKVIDVPDAPAAPKISNVGE



DSCIVQWEPPAYDGGQPVLGYILERKKKKSyrWMLNFDLLRELSHEARRMIEGVAYEMRVYAV  
NAVGMsrPSPASQPFMPiGPPGEPthLTVEDVSDTTVSLKWRPPERVGAGGLDGYsVEYCQEG-

CSEWVTALQGLTERTSLLVKDLPTGARLLFRVRAHNVAGPGGPIITKEPVTVQEILQRPRLQLP  
RHLRQTIQKKVGEpVNLLIPFQ-----

GKPRPQVTWTKEGQPLAGEEVSIRNSPTDTILFIRAAHRTHSGTYQVTVRIENMEDKATLVLQI  
V-----

DKPSPPLDIRVVETWGFsvALEWKPPQDDGNTeIWGYTVQKADKKTMEWFTVLEHYRQTHCVVS  
ELIIGNGYyFRVfshnmVgSSDRAAATKEPIFIPRPG-----

ITYEPPKYKALDFSEAPsFTQPLTNRSIIAGYNAILCCAVRGSPKPKISWfKNGLDLGEDARFR  
MFCKQGVLTLEIRKPCPYDGGVYVCrATNLQGEAQCECRLEVRVPQ-----

sp|070468|MYPC3\_MOUSE Myosin-binding protein C, cardiac-type  
OS=Mus -----

MPEPGKKPVSAFNKKPRSAEVTAGSAAVFEAETERSGVMVRWQRDGSditANDKYGLAAEGKRH  
TLTVRDASpDDQGSyAVIAGSSKVKFDLKVTE-----PAPPEKAES-----

EVAPG-----APEEVPAPATELEESVSSPEGSVSVTQDGSAAEH-  
QGAPDDPIGLFLMRPQDGEVTVGGSIVfSARVAGASLLKPPVVKWfKGKwVDLSSKVGQHLQLH  
DSYDRAS-----

KVYLFELHITDAQTTSAGGYRCEVSTKDKFDSCNFNLTVHEAIG-  
SGDLDLRSaFRRTSLAGAGRRTS-----DSHEDAGTPDFSSLLKKRDSFR-----

RDSKLEAPAEEDVWEILRQ-  
APPSEYERIAfQHGVEACHRPLKRLKGMKQDEKKSTAFQKKLEPAYQVNKGHKIRLTVELADPD  
AEVKWLKNGQEIQMSGs--

KYIFESVGAKRTLTISQCSLADDAAYQCvVGGEKcSTELFVKEPPVLITRSLEDQLVMVGORVE  
FECEVSEEGAQVKWLKDGVELTREETFk--

YRFKKDGRKHHLIINEATLEDAGHYAVRTSGGQSLAELIVQEKKLEVYQSIADLAVGAKDQAVF  
KCEVSDENVRGVWLKNGKELVDPNRIKvSHIGRVHKLTIddVTPADEADYSfVPEGFAC-

NLSAKLHFMEVKIDfVPRQEPPIHLDCPGSTPD-  
TIVVVTGNKLRLDVPISGDpAPTvvWQKTvtQgKKASAGPHPDAPEDAGADEEWVFDKLLCET  
EGRVRVETTKDRSVFTVEGAEKEDeGVYTVTVKNPVGEDQVNLTvKVIDVPDAPAAPKISNVGE  
DSCTVQWEPPAYDGGQPVLGYILERKKKKSyrWMLNFDLLRELSHEARRMIEGVAYEMRVYAV  
NAVGMsrPSPASQPFMPiGPPGEPthLAVEDVSDTTVSLKWRPPERVGAGGLDGYsVEYCQEG-

CSEWTPALQGLTERRSMLVKDLPTGARLLFRVRAHNVAGPGGPIVTKEPVTVQEILQRPRLQLP  
RHLRQTIQKKVGEpVNLLIPFQ-----

GKPRPQVTWTKEGQPLAGEEVSIRNSPTDTILFIRAAARRTHSGTYQVTVRIENMEDKATLILQI  
V-----

DKPSPQDIRIVETWGFNVALEWKPPQDDGNTeIWGYTVQKADKKTMEWFTVLEHYRRTHCVVS  
ELIIGNGYyFRVfshnmVgSSDKAAATKEPVFI PRPG-----

ITYEPPKYKALDFSEAPsFTQPLANRSIIAGYNAILCCAVRGSPKPKISWfKNGLDLGEDARFR  
MFCKQGVLTLEIRKPCPYDGGVYVCrATNLQGEAQCECRLEVRVPQ-----

gi|126332728|ref|XP\_0 PREDICTED: hypothetical protein  
[Monodelphis -----

-----

MPEPGKKAVSAFSSKPKSAEAAVGSALFEAETERAGLKLWRQAGSDISASDKYVLTSEGTRH  
TLTVQDVQPDDQGLYAAIAGTSKVKFELKVKE-----AAPGLSLG-----  
QEAAPWAPKDTSPGEGLLPSGPPVPGDASGPGSEGCPPNS-----  
EEASGDP IGLFVSRPQDGEVTVGDSITFSAQVAGASLLKPPVVKWFKGKWM DLSGKVGKNLQLH  
DSYDRAS-----  
KVYLFELHISEVQAAYAGGYRCEVSTKDKFDCNFNLTVHEAIG-  
PADL DLRS AFRRPSLPGGNRRTSG-----DGHDDAGSLDFSSLLKKRDLFRLVG-A-  
RDPKLEAPAEEDVWEILRT-  
APPSEYERIAFQHGVTDLRGMLKRLKGMKKDEKKSAAFLKKLEPAYQVNKGQKIRLVVEVADPD  
AEVKWLKNGQPIQMSGSG--  
KYIFESAGNKRMLTISQCSLADDAAYQCMVGGDKCSTELFVKEPPVLI TRGLEDQMVTVGORVE  
FECEVSEEGAPVKWLKDGVELTREETFK--  
YRFKKDGRKHHLIINEATLEDSGHYAIRTSGGQALAEELIVQEKTLEVYQNIADLTVGARDQAVF  
KCEVSDENVKGVWLKNGRELVPDSRIKVS HIGRVHKLTI DDVTPADEADYSFVPEGFAC-  
NLSAKLHFMEVKIDFVPRQEPPKIHLDCPGRTPD-  
TIVVAGNKLRLDVPISGDPAPTIVIQKASQESK-----  
TPDPATEVGDSSSEWVFEKLLCETEGRVRVETHKDRSIFTVEGAEKEDEGVYTVT VKNPVGEDQ  
VNITVKVIDVDPDPAAPKISNVGEDSCTVQWQPPAYDGGQPILGYILERKKKKS YRWMRLNFDL  
LRELSHEARMIEGVVYEMRVYAVNAIGMSRSPASQPFMPIGPPSEPTHLGVEDISDSSVTLK  
WRPPERVGAGGLDGY SVEYCREG-----  
SSEWVSALQSLTERTSLLVKELPTGARLLFRVRAHNLAGPSAPAITKEAITVQEILERPRLRLP  
RHLRQTVQRKVGEPVNILIPFQ-----  
GKPRPQVTWTKEGQPLAGNDVSI RNSPTDTILFIRTAHRAHSGTYQVAVQIENMEDTATLVLQI  
V-----  
DRSPPPQEV RV TETWGFNVALEWKPPQDDGNT ELWGYTVQKADKKTMEWFTVLEHYRRTHCVVS  
ELIMGNNYFRVFSHNMVGASEKAATTKEPVFIPKIG-----  
LTYQPPTYKALDFSEAPSFTQPLVNRSVIAGYNAVLCCSVRGS PKPKISWFKNGLDLGEDARFR  
MFSKQGVLTLEIRKPCPFDDGGAYVC RATNAQGEAQCECRLEVRGKDVV-----  
-----  
gi|157823379|ref|NP\_0 myosin binding protein C, fast-type  
[Rattus n -----  
-----MPEAKPAAKKAP-KGKDAPKEAPA-----  
-----AKQTPP-----  
-----AEPPKEAPPEDQSPTVE-----  
EPTGLFLKKPDSVSVETGKDTVILAKVNGKELPGKPSIKWFKGKWQELGSKSGARFTFKESHDS  
ASNVRPPT-----  
GPEPGLATEPVYTVELHIGKVVLGDRGDYRLEV KAKDVCDSCPFNVDVEAPRQ-  
DSSGQSLESFKRSGD-----GKSEDAGELDFSGLLKKREVVEEKKKKK-  
DDDDLGIPEI WELLLKG-  
AKKSEYEKIAFQYGITDLRGMLKRLK KAKVEVKKSAAFTKKLDPAYQVDRGNKIKLVVEISDPD  
LPLKWFKNGQEIKPSS---  
KYVFENVGKKRI LTINKCTLADDAAYEVAVKDEKCFTEL FVKEPPVLI VTPLEDQQV FVGDRVE  
MSVEVSEEGAQVMWKDGVEMTRED SYKARYRFKKDGKRHIL IYSDVAQEDGGRYQVITNGGQC  
EAE LIVEEKQLEVLQDIADLTVKASEQAVFKCEVSDEKVTGKWKYNGVEVRPSKRITISHVGRF  
HKLVIDDVRPEDEGDYTFVPDGYAL-  
SLSAKLNFLEIKVEYVPKQEPPKIHLDCSGKTS DNSIVVAGNKLRLDVAITGEPPTATWLK-  
-----

GDEVFTVSEGRTRIEQRPCDSSFVIESAERSDEGRYTIKVTNPAGEDVASIFLRVVDVDPPEA  
VRVTSVGEDWAILVWEPPKYDGGQPVTGYLMERKKKGSHRWMKLNFEVFTDTTYESTKMIEGVL  
YEMRVFAVNAIGVSQPSMNTKPFMPIAPTSAPQHLTVEDVTDTTTTLKW RPPDRIGAGGIDGYL  
VEYCLEG-----

SEEWVSANKEPVERCGFTVKDLPTGARILFRVVG VNIAGRSEPATLLQPVTIREIVEQPKIRLP  
RHLRQTYIRKVGEALNLVIPFQ-----

GKPRPQVVWTKGGAPLDTSRVNVRTSDFDTVFFVRQAARSDSGEYELSVQIENMKDTATIRIRV  
V-----

EKAGPAENVMVKEVWGTNALVEWQPPKDDGNSEITGYFVQKADKKTMEW FNVYEHN RHTSCTVS  
DLIVGNEY YFRVFS ENICGLSDSPGVSKNTARILKTG-----

ITLKPMEYKEHDFRTAPKFLTPLMDRVV VAGYAAALNCAVRGHPKPKVVMKNKMEIHEDPKFL  
ITNYQGILTLNIRRPSPFDAGTYS CRAFNELGEALAECKLDVRVPQ-----

-----  
gi|81910387|sp|Q5XKE0 RecName: Full=Myosin-binding protein C,  
fast-----

-----MPEAKPAAKKAS-KGKDAPKEAP-----

-----AKQTP-----

-----EPPKEAPPEDQSPTAE-----

EPTGIFLKKPDSVSVETGKDAVILAKVNGKELPGKPTIKWFKGKWQELGSKSGARFIFKESHDS  
TSN-----

VYTVELHIGKVVLGDRGDYRLEIKAKDVCDSCSFNVDVEAPRQ-DSSGQSLESFKRSGD-----  
-----GKSEDAGELDFSGLLKKREVVEEEKKKKK- DDDDLGIPPEIWELLKG-

AKKSEYEKIAFQYGITDLRGMLKRLKKAKVEVKKSAAFTKKLDPAYQVDRGNKIKLVVEISDPD  
LPLKWFKNQEI KPSS---

KYVFENVGKKRILTINKCTLADDAAYEVAVQDEKCFTELFVKEPPVLIVT PLEDQQV FVGDRVE  
MSVEVSEEGAQVMWMDG VEMTRED SYKARYRFKKDGKRHIL IYSDVAQEDGGRYQVITNGGQC  
EAELIVEEKQLEVLQDIADLTVKAAEQAVFKCEVSDEKVTGKWKNGVEVRPSKRITISHVGRF  
HKLVIDDVRPEDEGDYTFVPDGYAL-

SLSAKLNFLEIKVEYVPKQEPPIHLDCSGKTS DNSIVVAGNKLRLDVAITGEPPTATWLR-

-----  
GDEVFTATEGRTHIEQRPCDSSFVIESAERSDEGRYTIKVTNPVGEDVASIFLRVVDVDPPEA  
VRVTSVGEDWAILVWEPPKYDGGQPVTGYLMERKKKGSQRWMKINFEVFTDTTYESTKMIEGVL  
YEMRVFAVNAIGVSQPSMNTKPFMPIAPTSAPQHLTVEDVTDTTTTLKW RPPDRIGAGGIDGYL  
VEYCLEG-----

SEEWVPANKEPVERCGFTVKDLPTGARILFRVVG VNIAGRSEPATLLQPVTIREIVEQPKIRLP  
RHLRQTYIRKVGEALNLVIPFQ-----

GKPRPQVVWTKGGAPLDTSRVNVRTSDFDTVFFVRQAARSDSGEYELSVQIENMKDTATIRIRV  
V-----

EKAGPAENVMVKEVWGTNALVEWQPPKDDGNSEITGYFVQKADKKTMEW FNVYEHN RHTSCTVS  
DLIVGNEY YFRIFSENICGLSDSPGVSKNTARILKTG-----

ITLKPLEYKEHDFRTAPKFLTPLMDRVV VAGYTAALNCAVRGHPKPKVVMKNKMEIHEDPKFL  
ITNYQGILTLNIRRPSPFDAGTYS CRAFNELGEALAECKLDVRVPQ-----

-----  
gi|6093456|sp|Q14324. RecName: Full=Myosin-binding protein C,  
fast-----

-----MPEAKPAAKKAP-KGKDAPKGAP-----

-----KEAPPKE-----

-----APAEAPKEAPPEDQSPTAE-----  
EPTGVFLKKPDSVSVETGKDAVVAVKNGKELPKPTIKWFKGKWLELGSKSGARFSFKESHNS  
ASN-----  
VYTVELHIGKVVLGDRGYRLEVAKADTCDSGPNIDVEAPRQ-DASGQSLESFKRTSE-----  
-----KKSDTAGELDFSGLLKKREVVEEEKKKKKKDDDDLGIPEIWEELLKG-  
AKKSEYEKIAFQYGITDLRGMLKRLKAKVEVKKSAAF TKKLDPAYQVDRGNKIKLMVEISDPD  
LTLKWFKNQGEIKPSS---  
KYVFENVGKKRIILTINKCTLADDAAYEVAVKDEKCFTELFVKEPPVLIVTPLEDQQVFGDRVE  
MAVEVSEEGAQVMWMDGVELTREDSEFKARYRFKKDGKRHILIFSDVVQEDRGRYQVITNGGQC  
EAELIVEEKQLEVLQDIADLTVKASEQAVFKCEVSDEKVTGKWKNGVEVRPSKRITISHVGRF  
HKLVIDDVRPEDEGDYTFVPDGYALGSLSAKLNFLLEIKVEYVVKQEPPIHLDCSGKTSENAIV  
VVAGNKLRLDVSITGEPPP VATWLK-----  
GDEVFTTTEGRTRIEKRVDCSSFVIESAQREDEGRYTIKVTNPVGEDVASIFLQVVDVDPPEA  
VRITSVGEDWAILVWEPPMYDGGKPVGTGYLVERKKKGSQRWMLNFEVFTETTYESTKMIIEGIL  
YEMRVFAVNAIGVSQPSMNTKPFMPIAPTSEPLHLIVEDVTDTTTTLKW RPPNRIGAGGIDGYL  
VEYCLEG-----  
SEEWVPANTEPVERCGFTVKNLPTGARILFRVVG VNIAGRTEPATLAQPVTIREIAEPPKIRLP  
RHLRQTYIRKVG EQLNLVVPFQ-----  
GKPRPQVVWTKGGAPLDTSRVHVRTSDFDTVFFVRQAARSDSGEYELSVQIENMKDTATIRIRV  
V-----  
EKAGPPINVMVKEVWGTNALVEWQAPKDDGNSEIMGYFVQKADKKTMEWFNVYERNRHTSCTVS  
DLIVGNEYFRVYTENICGLSDSPGVSKNTARILKTG-----  
ITFKPFEYKEHDFRMAPKFLTPLIDRVVAGYSAALNCAVRGHPKPKVVMKMKMEIREDPKFL  
ITNYQGVLTNLNRRPSPFDAGTYTCRAVNELGEALAECKLEVRVPQ-----

gi|73946990|ref|XP\_53 PREDICTED: similar to myosin binding  
protein

-----MPEAKPVAKKAPAKGKDAAQAP-----  
-----KEAPPEA-----  
-----APAQPPEEAPPEDQSPTAE-----  
EPTGIFLKKPDSVSVENGKDTHIVAKVNGKELPGKPTIKWFKGKWLELGSKSGARFSFKESHDS  
ASN-----  
VYTVELHIGKVVLGDRGNRLEVAKADFCDSCAFNIDVEAPRH-NTSVQGLESFKRTGE-----  
-----GKSEDGGELDFSSLLKKREVVEEEKKKKK-DDDDLGIPEIWEELLKG-  
AKKSEYEKIAFQYGITDLRGMLKRLKAKVEVKKSAAF TKKLDPAYQVDRGNKIKLVVEISDPD  
LPLKWKYKNGQGEIKPSS---  
KYVFENVGKKRIILTINKCTLADDAAYEVAVKDEKCFTELFVKEPPVLIVKPLEDQQVFGDRVE  
MSVEVSEEDGAQVMWMDGVELTREDSEFKARYRFKKDGKRHILIIYSDVTLEDGGRYQVMTNGDQC  
EADLIVEEKQLEVLQDIADLTVKASEQAVFKCEVSDEKVTGKWKNGIEVRPSKRITISHVGRF  
HKLVIDDVRPEDEGDYTFVPDGYAL-  
SLSAKLNFLLEIKVEYVVKQEPPIHLDCSGKTSENSLVVVAGNKLRLDVSITGEPRPVATWLK-  
-----  
GDEVFTATEGRIRLEHQTDSSSFVIESADRADEGRYTIKVTNPVGEDVASIFLRVVDVDPPEA  
VRVTSVGEDWAILVWEPPKYDGGQPVGTGYLLERKKKGSQRWMLNFEVFTETTYESTKMIIEGIL  
YEMRVFAVNAIGVSQPSMNTKPFMPIAPTSEPLHLMVEDVTDTTTTLKW RPPDRIGAGGIDGYL  
VEYCLEG-----  
SEWVPANTELTERCGFTVKNLPTGAKILFRVVAINIAGRSQPASLFPVTIREIVQQPKIRLP

RHLRQTYIRKVGEHLNLVIPFQ-----  
GKPRPQVVWTKGGAPVDPARVHVRTSDFDTVFFVVRQAARSDSGEYELTVQIENMKDTATIHIQV  
V-----  
EKAGPAENVMVKEVWGTNALVEWQPPKDNNGNSEITGYFVQKADKKTMEWFTVYEHNHRHTSCTVP  
DLIVGNEYFYFRVFSENICGLSDSPGVSKNTARILKTG-----  
ITFKPLEYKEHDFRTPPKFLTPLPDRVVVAGYAAALNCAVRGYPKPKVVMKNQMEIREDPKFL  
MTNYQGVLTLNIRRPSPFDAGTYSCRAVNELGEALAECKLEVRVPQ-----

gi|194215816|ref|XP\_0 PREDICTED: similar to Myosin binding  
protein -----

-----MPEAKPAAKKAP-EKKDAAKPAP-----  
-----KEAPPKE-----  
-----APAEPKKEAPPEDQSPTAE-----  
EPTGIFLKKPDSVSVENGGKDTVIVAKVNGKELQ GKPTFKWIKGWLELGSKSGARFTFKESHDP  
ASN-----  
VYTLELHIGKVVLGDRGDYRLEVKAKDFSDSCGFNIDVEAPRQ-DSSGQSLESFKRSGE-----  
-----GKMKDAGELDFSGLLRKREVV EENKKKKKDDDDL GIPPEVWELLKG-  
AKKSEYERIAFAQYGITDLRGMLKRLKKAKEVVKSAAF TKKLDPAYQVDKGNKIKLVVEISDPD  
LPLKWFKNGQEIKPSS---  
KYVFENVGKKRIILTINKCTLADDAAYEVVKDEKCFTELFVREPPVLIITPLEDQQVFGDRVE  
MSVEVSEEGAQVMWKDGVEMTRED SYKAQYRFKKDGKRHILYSEVTLEDKGRYRVMTNGGQC  
EADLIVEEKQLEVLQDIADLTVKASEQAEFKCEVSDEKVTGKWKYKNGVEVRPSKRITISHIGRV  
HKLVIDDVRPEDEGDYMFVPDGYAL-  
SLSAKLNFLEIKVEYVPKQEPPIHLDCSGKTSENAI VVVAGNKLRLDVSITGEPLPVATWLK-

-----  
EDQVFSATEGRVRIEQREGSSSFLIESAERGDEGRYTIKVTNPAGEDVASIFLRVVDVDPPEA  
VRVTSVGEDWAVLVWEPPKYDGGQPLT-----  
-----  
-----

-----EQPKIRLPRHLRETYVRKVGEHLNLVIPFQ-----  
GKPRPQVVWTKGGAPVDTSRVHVRTSDFDTVFFVREAARSDSGEYELSVQIENMKDTATIRIRV  
V-----  
EKAGPPEHVMVKEVWGTNALVEWQPPKDDGNSEITGYLVQKADKKTMEWFTVYEHNHRHTCCTVS  
DLIMGNEYFYFRVYSENF CGLSDLPGVSKNTARIVKTG-----  
ITFKPFEYKEHDFRMAPRFLTPLPDRVVVAGYAAALNCAVRGHPKPKVVMKNMEIREDPKFL  
MTNYQGVLTLNIRRPSPFDAGTYSCRAVNELGEALAECKLEVRVIPGTMMLVDRPPETRAGRGA  
AEGDLGSLLCRSETVFRLPRLVAAESYPDPPRCVPFRSCH-----

gi|113206110|ref|NP\_0 myosin binding protein C, fast type

[Gallus g -----  
-----MPEPSKAAPKKEAKKKEEKKEEK-----  
-----KEAPP-----  
-----PQEHKDEAPDDVHPPETP-----  
DPEGLFLSKPQNMVESGRDVTVSARVAGAALPCAPAVKWFKGKWAELGDKS-ARCRLRHSVD-  
DDK-----  
VHTFELTITKVAMGDRGDYRCEVTAKEQKDS CSFSIDVEAPR--SSEGNVLQAFKRTGE-----  
-----GKDDTAGELDFSGLLKKREVV EEEKKKKK-DEDDQ-  
FPPEIWELLKGVTKKSEYERIAFAQYGITDLRGMLKRLKKVHVEPKKSEAFIRKLDPAYQVDKGN

KIKLVVELSDPDLPLKWKYKNGQLLKPST---  
KYVFENVGLKRILTIHKCSLADDAAYECRVNDEKCFTEVFVKEPPVTVVRGLEDQQVVGDRVV  
LEAEVSEEGAQVMWLKDGVDVTRDDAFK--  
YRFKKGKHHFLIINEAELSDSAHYKIMTNGGESEAELSVEEKQLEVLQDMADLTVKASEQAVF  
KCEVSDEKVTGRWFRNGVEVKPSKRIHISHNGRFHKLVIDDVRPEDEGDYTFIPDGYAL-  
SLSAKLNFLEIKVEYVVPKQEPKIHLDSCGKAAENTIVVAGNKVRLDVPIISGEPAPTVTWKR-  
-----  
GDQLFTATEGRVHIDSQADLSSFVIESAERSDEGRYCITVTNPVGEDSATLHVRVVDVDPDPQS  
VRVTSVGEDWAVLSWEAPPFDGGMPITGYLMERKKKGSRMWMLNFEVFPDTTYESTKMIEGVF  
YEMRVFAVNAIGVSQPSLNTQPFMPIAPTSEPTHVVLEDVTDTTATIKWRPPERIGAGGVDGYL  
VEWCREG-----  
SNEWVAANTELVERCGLTARGLPTGERLLFRVISVNMAGKSPPATMAQPVTIREIVERPKIRLP  
RHLRQTYIRRVGEQVNLVIPFQ-----GKPRPQVTSREGGALP-  
AEVQTRTSDVDSVFFIRSAARPLSGNYEMRVRIDNMEDCATLRLRVV-----  
-----  
ERPGPPQAVRVMVWGSNALLQWEPPKDDGNAEISGYTVQKADTRTMWFTVLEHSRPRCTVS  
ELVMGNEYRFRVYSENVCGTSQEPATSHNTARIAKEG-----  
LTLKMVPYKERDLRAAPQFLTPLVDRSVVAGYTVTLNCAVRGHPKPKVTWLKNSVEIGADPKFL  
SRHGLGVLSLLIRRPFPDGGTYGCRAVNEMGEATTECRLDVRVPQ-----  
-----  
gi|6166597|sp|Q00872. RecName: Full=Myosin-binding protein C,  
slow- -----  
-----MPEPT-----KKE-----ENE--  
VPAPAPPPEEPSKEKEAGTTPAKD-----  
-----WTLVETPPG-EEQAKQNA-----  
NSQLSILFIEKPQGGTVKVGEDITFIAKVAEDLLRKPTIKWFKGKWMDLASKAGKHLQLKETF  
ERHS-----  
RVYTFEMQIIKAKDNFAGNYRCEVYKDKFDSFDFLEVHESTGTTPNIDIRSAFKRSGE----  
-----GQEDAGELDFSGLLKR-----REVKQQEEEPQVDVWELLKN-  
AKPSEYEKIAFQYGITDLRGMLKRLKRMREEKKSAAFAKILDPAYQVDKGGRRVRFVVELADPK  
LEVWKYKNGQEIRPS---  
TKYIFEHKGCRILFINNCQMTDDSEYYVTAGDEKCSSTELFVREPPIMVTKQLEDTTAYCGERV  
ELECEVSEDDANVKWFKNGEEIIPGPKSR--  
YRIRVEGKHHILIEGATKADAAEYSVMTTGGQSSAKLSVDLKPLKILTPLTDQTVNLGKEICL  
KCEIS-ENIPGKWTKNGLPVQESDRLKVVHKGRHKLVIANALTEDEGDYVFAPDAYNV-  
TLPKAVHVID-----PPKIILDG-LDA-DNTVTVIAGNKLRLEIPISGEPKAMWSR-  
-----  
GDKAIMEGSGRIRTESYPDSSTLVIDIAERDDSGVYHINLKNEAGEAHASIKVKVVDVDPDPVA  
PTVTEVGDDWCIMNWEPPAYDGGSPILGYFIERKKKQSSRMWMLNFDLCKETTFEPKMIIEGVA  
YEVRIFAVNAIGISKPSMPSRPFVPLAVTSPPTLLTVDSVTDTTVTMRWRPPDHIGAAGLDGYV  
LEYCFEGSTSAKQSDENGEAAYDLPAEDWIVANKDLIDKTKFTITGLPTDAKIFVRVKAVNAAG  
ASEPKYYSQPILVKEIIEPPKIRIPRHLKQTYIRRVGEAVNLVIPFQ-----  
GKPRPELTWKKDGAIEIDKNQINIRNSETDTIIFIRKAERSHSGKYDLQVKVDKFVETASIDIQI  
I-----  
DRPGPPQIVKIEDVWGENVALTWTTPKDDGNAAITGYTIQKADKKSMEWFTVIEHYHRTSATIT  
ELVIGNEYFRVFSENMCGLSEDATMTKESAVIARDG-----  
KIYKNPVYEDFDFSEAPMFTQPLVNTYAIAGYNATLNCVSRGNPKPKITWMKKNKVAIVDDPRYR

MFSNQGVCTLEIRKPSPYDGGTYCCKAVNDLGTVEIECKLEVK-----VIAQ-----

-----  
gi|160425243|ref|NP\_0 myosin binding protein C, slow type [Bos  
taur -----

-----MPEPT-----KKE-----  
ENEVLAPAPAPPPEEPNKEKEAGTAPVKEPNKEKEAGTAPAKEPNKEKEAGTAPAKEPNKEKEA  
GTSPGKDEEDASPPGGLPPEWSIGESPAG-EEQDKQNA-----  
--

NSQLSILFVEKQPQGGTVKVGENITFIAKVKAEDLLRKPTVKWFKGKWMDLASKAGKHLQLKET  
ERHS-----

RVYTFEMQIIKAKENYAGNYRCEVITYKDKFDSCSFDLEVLESTGTTPNIDIRSAFKRSGE----  
-----GQDDAGELDFSGLLKR-----REVKQEEQPEVDVWELLKN-  
AKPSEYEKIAFQYGITDLRGMLRRLKRMRRVEKKSAAFARILDPAVQVDKGGRRVRFVVELADPK  
LEVWKYKNGQEIRPS---

TKYIFEHKGGERIMFINNCLTDDSEYYVTAGDEKCSSTELFVREPPVMVTKQLEDTKAYCGERV  
ELECEVSEDDANVKWFKNGEEIIPGPKSR--

YHIRVEGKKHILIIDGATKADSAEYSVMTTGGQSSAKLSVDLKPLKILTPPLTDQTVNLGKEICL  
KCEVS-ENITGKWTKNGLPVQETDHLKIVHKGRIHKLVIANALVEDEGDYVFTPDYSV-  
TLPKVVHVD-----PPKINLDG-LDA-DNTVTVIAGNKLRLLEIPISGEPPPALWSR-  
-----

ADKAIMEGSGRIRSENYPDSTTLVIDIAEKDDSGVYHINLKNEAGEAHASIKIKVVDIPDPPVA  
PNVTDVGDWCIMTWDPPPLYDGGSPILGYFIERKKKQSSRWMRLNFDLCKETIFEPKKMIEGVA  
YEVRIFAVNAVGISKPSMPSKPFVPLAVTSPPTLLTVDSVTDTTVTMWRPPDQIGAAGLDGYV  
LEYCFEGSTSAKQSDENGEAAYDLPADDWIAANTELIEKTKFTITGLPTDSRIYVRVKAVNAAG  
ASEPKYYSQPILVKEIIEAPKIRIPRHLKQTYIRRVEAINLVIPIPFQ-----  
GKPRPELIWTKDGAPIDKNQINIRNSETDTIVFIRKAERSHSGKYDLQVKVEKFVETASIDIRV  
I-----

DRPGPPQLVKIEDVWGENVALSWTPPRDDGNTAITGYTIQKADKKSMEWFTVIEHYHRTSATIT  
ELVIGNEYFYFRVFAENMCGLSEDATMTKESAVIAKDG-----

KIYKNPVYEDFDFTEAPMFTQPLVNTYAVAGYNATLNCSVRGNPKPKITWMKNKVVIKDDPRYR  
MFSNQGVCTLEIRKPSPYDGGTYCCKAVNDLGTVEIECKLEVK-----VVAQ-----

-----  
gi|194226708|ref|XP\_0 PREDICTED: myosin binding protein C, slow  
typ -----

-----MPEPT-----KKE-----ENE--  
APAPAPAPAEPNKEKEAGTAPAKDEEETFPPSALPPGLGSRALERKDS-----  
-----EWSLGDSPAG-EDQDKQNA-----

NSQLSTLLVEKQPQSGAVKVGENITFIAKVKAEDLLRKPTIKWFKGKWMDLASKAGKHLQLKET  
ERHS-----

RVYTFEMQIIKAKENFAGNYRCEVITYKDKFDSCSFDLEVHESSTGTTPNIDIRSAFKRSGE----  
-----GQEDAGELDFSGLLKR-----REVKQEEETPEVDVWELLKN-  
AKPSEYEKIAFQYGITDLRGMLKRLKRMRRVEKKSAAFARILDPAVQVDKGGRRVRFVVELADPK  
LEVWKYKNGQEIRPS---

TKYIFEHKGGERIMFINNCLTDDSEYYVTAGDEKCSSTELFVREPPVMVTKQLEDTKAYCGERV  
ELECEVSEDDANVKWFKNGEEIIPGPKSR--

YRIKVDGKKHILIEGATKADTAEYSVMTTGGQSSAKLSVDLKPLKVLTPPLTDQTVKLGNEICL  
KCEIS-ENITGKWTKNGLPIQESDRLKVVHKGRIHKLVIANALVEDEGDYVFTPDYSYSI-

TLPKAVHVVD-----PPRIILDG-LDA-DNTVTVIAGNKLRLLEIPISGEPPP KALWSR-  
-----

ADKAIMEGSGRIRAESYPDSSTLVIDVAEKEDSGVYHINLKNEAGEAHASIRIKVVVDIPDPPVA  
PTVTEVGDDWCIMNWEPPAYDGGSPILGYFIERKKKQSSRWMRLNFDLIKETTFFPKMIEGVA  
YEVRIFAVNAVGISKPSTPSRPFVPLAVTSPPTLLAVDSVTDNSVMTMKWRPPDHIGAAGLDGYV  
LEYCFEGS-----

DNWLAANKDLIDKTKFTITDLPTDAKIFVRVKAVNKAGASEPKYYSQPILVKQIEPPKIRIPR  
HLKQTYIRRVEAVNLVIPFQ-----  
GKPKPELTWKKDGAIEIDKNQVNIRNSETDTIIFIRKAERSHSGKYDLQVKVEKFVERATIDIQI  
I-----

DRPGPPQVVKIEDVWGENVALSWTPPKDDGNAAITGYTIQKADKKSMEWFTVIEHYHRTSATIS  
ELVIGNEYFRVFAENMCGLSEATMTKESAVIAKDG-----  
KIYKNPVYEDFDFTEAPMFTQPLVNTYAVAGYNATLNCSVRGNPKPKITWMKNKVTIVDDPRYR  
MFSNQGVCTLEIRKPSPYDGGTYSCAVNDLGTVEIECKLEVK-----VVAQ-----

gi|109481744|ref|XP\_0 PREDICTED: similar to myosin binding  
protein -----

-----MPEPT-----KKE-----  
ENEVPAPAPPPEEPNKDKEAGTTPAKEEDEASPPSALPPGLGSRALERKDS-----  
-----EWSLGESESPAGGEEQDKQNA-----  
NSQLSTLTFVEKQPQTGSVKVGANITFIAKVKAEDLLRKPTVKWFKGKWMDLASKAGKHLQLKETF  
ERQT-----

RIYTFEMQIIKAKENYAGNYRCEVYTKDKFDFSCSFDLEVHESTGTTPNIDIRSAFKRSGE-----  
-----GQEDAGELDFSGLLKR-----REVKQEEEEPEIDWELLKN-  
ANPNEYEKIAFQYGITDLRGLMLKRLKRMRRVEKKSAAFAKILDPAYQIDKGGVRVFFVELADPK  
LEVWFKNGQEIRPS---

TKYIFEHKGNERIMFINNCALTDDSEYYVTAGDEKCSSTELFVREPPIMVTKQLEDMNAYCGERV  
ELEVEVSEDDANVKWFKNGEEIIVPGPKSR--  
YRIKVEGKHTLIEGATKADSAEYSVMTTGGQSSAKLSVDLRPLKITTPPLTDQTVKLGKEVCL  
KCEIS-ENVPGKWTKNGLPVQEGERLKVHKGRIHKLVIANALIEDEGEYVFTPDAYNV-  
PLSAKVHVID-----PPKIILDG-LDA-DNTVTVIAGSKLRLEIPVTGEPPP KAIWSR-  
-----

ADKAIMEGSGRIRAESYPDSSTLVIDVAERDDSGVYNINLKNEAGEAHASIKIKVVVDIPDPPVA  
PNVTEVGDDWCIMNWEPPVYDGGSPILGYFIERKKKQSSRWMRLNFDLCKETTFFPKMIEGVA  
YEVRIFAVNAIGISKPSMPSKPFVPLAVTSPPTLLAVDSVTDSSVMTMKWRPPDQIGAAGLDGYV  
LEYCFEGT-----

EDWITANTDLIDKTKFTITGLPTDAKIFVRVKAINAAGASEPKYYSQPILVKEIEPPKIRIPR  
HLKQTYIRRVEAVNLVIPFQ-----  
GKPRPELTWKKDGAIEIDKNQINIRNSETDTIIFIRKAERSHSGKYDLEVKVDKYVENASIDIQI  
V-----

DRPGPPQAVTIEDVWGENVALTWTTPPKDDGNAAITGYTIQKADKKSMEWFTVIEHYHRTNATIT  
ELVIGNEYFRVFAENMCGLSEATMTKESAVIAKDG-----  
KIYKNPVYEDFDFTEAPMFTQPLVNTYAIAGYNATLNCSVRGNPKPKITWMKNKVAIVDDPRYR  
MFSNQGVCTLEIRKPSPYDGGTYCCKAVNDLGTVEIECKLEVKGGLSFCRLLLQGVPPNIIDSY  
LRDLQSSNPEEY-----

gi|40254303|ref|NP\_78 myosin binding protein C, slow type [Mus  
musc -----



-----MPEPT-----KKE-----  
ENEVSAPAPPPEEPNKEKEAGTAPAK-----  
-----EWSLGES PAGGEEQDKQNA-----  
NSQLSTLFVEKQPQTGSVKVGANITFVAKVRAEDLLRKPTVKWFKGKWMDLASKAGKHLQLKET  
ERQT-----  
RVYTFEMQIIKAKENYAGNYRCEVYTKDKFDSCSFDLEVHESTGTTTPNIDIRSAFKRSGE----  
-----GQEDAGELDFSGLLKR-----REVKQEEEEPEIDVWELLKN-  
ANPNEYEKIAFQYGITDLRGMLKRLKRMRRVEKKSAAFAKILDPAYQVDKGGKVRVVELADPK  
LEVWFKNGQEIRPS---  
TKYIFEHKGNERIMFINNCSLTDDSEYYVTAGDEKCSSTELFVREPPIMVTKQLEDMNAYCGERV  
EMEVEVSEDDANVKWFKNGEEIFPGPKSR--  
YKIKVEGKKHTLIEGATKADSAEYSAMTTGGQSSAKLSVDLRPLKITTPPLTDQTVKLGKEVCL  
KCEIS-ENVPGKWTKNGLPVQEGERLKVHKGRIHKLVIANALIEDEGEYVFTPDAYNV-  
PLSAKVHVID-----PPKIILDG-LDA-DNTVTVIAGSKLRLEIPVTGEPKAIWSR-  
-----  
ADKAIMEGSGRIRAESYPDSSTLVIDVAERDDSGVYNINLKNEAGEAHASIKIKVVDIPDPPVA  
PNVTEVGDDWCIMNWEPPAYDGGSPILGYFIERKKKQSSRWMRLNFDLCKETTFEPKMIIEGVA  
YEVRIFAVNAIGISKPSMPSKPFVPLAVTSPPTLLAVDSVTDSSVTMKWRPPDQIGAAGLDGYV  
LEYCFEGT-----  
EDWIVANTDLIDKTKFTINGLPTDAKIFVRVKAINAAGASEPKYYSQPILVKEIEEPPKIRIPR  
HLKQTYIRRVEAVNLVIPFQ-----  
GKPRPELTKKDGEEIDKNQINIRNSETDTIIFIRKAERSHSGKYDLQVKVDKYVENASIDIQI  
V-----  
DRPGPPQTVTIEDVWGENVALTWTTPPKDDGNAAITGYTIQKADKKSMEWFTVIEHYHRTNATIT  
ELVIGNEYFRVFAENMCGLSEDATMTKESAVIAKDG-----  
KIYKNPVYEDFNFTAPMFTQPLVNTYAIAGYNATLNCSVRGNPKPKITWMKNKVAIVDDPRYR  
MFSNQGVCTLEIRKPSPYDGGTYCCKAVNDLGTVEIECKLEVK-----VVAQ-----  
-----  
gi|126339738|ref|XP\_0 PREDICTED: similar to RIKEN cDNA  
8030451F13 g -----  
MDTFTSQWSVGGLLWDDNINKNKTITMMEDN-----  
DNDEFSQHPDNKLAELFRFCGNGKVYDDNSEPENEAAPPPEEPSKEKEGGSGPPKGEADVSP  
PSALPADINARALARKDS-----EWSLGES PVG-  
EEQDKQNS-----  
NTSQSALFVEKQPQNGTVKVGENITFIAKVEAKDLLRKPTVKWFKGKWMDLASKAGKHLQLKET  
ERQT-----  
RMYTFEMQIIKAKENYAGNYRCEVSYKDKFDSCSFDLEVHESTGTTTPNIDIRSAFKRSGE----  
-----GQEDAGELDFSGLLKR-----REVKQEEEEPEIDVWELLKN-  
ANPNEYEKIAFQYGITDLRGMLKRLKRMRRVEKKSAAFSKILDPAYQVDKGGKVRVVELADPK  
LEVWYKNGQEIRPS---  
TKYIFEHKGNRIMFINNCQMTDDSEYYVTAGDEKCSSTELFVREPPIMVTKQLEDTNAYCGERI  
ELECEVSEDDANVKWFKNGEEIVIGPKSR--  
YKVKVEGKKHTLIEGATKADSAEYSVMTTGGQSSCKLSVDLRPLKILQPLTDVTVKLGKEICL  
KCEIS-ENISGKWTKNGLPVQEGERLKVHKGKIHKLVIANALIEDEGEYVFAPDAYTV-  
TLPKAVHVID-----PPKIYLDG-LEA-DNTVTVIAGSKLRLEIPVSGEPAPKALWSR-  
-----  
ADKAIAEGGGRIRAESYPDSSTLVIDVAEREDSGVYNINLKNEAGEAHASIKIKVVDIPDPPLA

PNVSDVGDDWCIMNWEPPANDGGSPILGYFIERKKKQSSRWMLNFDLIKETTFEPKKMIEGVA  
YEVRIFAVNAIGISKPSMPSKPFVPLAVTSPPTLLAVDSVTDSTVTMKWRPPDQIGAAGLDGYV  
LEYCFEGT-----  
EDWIVANPELTDKTKFTITGLPTDAKIFVRVKAVNAAGASEPKYYGQPILVKEIEEPPKIRIPR  
HLKQTYLRRVGEAVNLVIPFQ-----  
GKPRPELTKKDGADIDKNQINIRNSETDTIIFIRKAERSHSGKYDLEVKVDKYVDSASIDIQI  
V-----  
DRPGPPQSVKIEDVWGENAALVWTPPKDDGNAAITGYTIQKADKKSMEWFTVIEHYHRTNATIT  
ELVIGNEYFRVFAENMCGLSEEATMTKESAVIAKDG-----  
KVYKNPVYDDFDTEAPMFTQPLVNTYAIAGYNATLNCVSRGNPKPKITWMKNKVAIVNDPRYR  
MFSNQGVTLEIRKPSPYDGGTYCCKAVNELGTVEIECKLEVK-----VVAQ-----

gi|149637879|ref|XP\_0 PREDICTED: similar to myosin binding  
protein

MAVTNRYSPHLPLCDWGSWNDPAAKLWGEIPCRWQEMPLCHWGRVAPPLSPSAWLKILISQSGS  
SSSPSPAGLSPPPFHGLQKE-----  
GRLKNEAPPAPPAPPEGQNKKEGGSGQAKDEDEATPPNALPKDGNLQSLERKDS-----  
-----EWSLGEGPPA-EEQDKQNA-----  
-----

NSQLSTLFVEKPGSGTVKVGDDITFLAKVEAKDLLRKPTVKWFKGWMDLASKAGKHLQLKETF  
ERQT-----  
RMYTFEMQIIKAKENYAGNYRCEVSYKDKFDSCSFDLEVKESTGTTPSIDIRSAFKRSGE-----  
-----GQEDAGELDFSGLLKR-----REIK-QEEEPDIDVWELLKN-  
ANPNEYEKIAFQYGITDLRGLMLKRLKRMRRVEKKSAAFAKILDPAVQVDKGGKVRVVELTDPK  
VELKWKYKNGQEIRPS---  
TKYIFEHKGNRILFINNCTLADDSEYYVSAGDEKCSSTELFVREPPILVTKQLEDNTNYCGERV  
ELDCEVSEEGANVKWFKNGEEIDTGPRSR--  
YKVKVDGKKHILIIDGATKADNAEYSVMTTGGQSSAKLSVDLRPLKIVQPLTDTTVKLGKEITL  
RCELS-ENITGKWTKNGLPVQESDRLKIQHKGRIHKLVIIGTSAVEDEGEYVFTPDAYSV-  
TLSAKVHVID-----PPKLYLDG-LDA-DNTVTVVAGSKLRLEIPVTGEPKAIWSR-  
-----

ADKCIMESGGRIRAESYPDSSTLVIDVAEREDSGIYKINLKNEAGEAQASIKIKVVDIPDPPVA  
PSVADVGDDWCIMNWEPPVNDGGSPILGYFIERKKKQSSRWMLNFDLCKETTFEPKKMIEGVA  
YEVRIFAVNAIGISKPSMPSKPFVPLAVTSPPTLLAVDSITDTTVTMKWRPPDQIGAAGLDGYV  
VEYCLEGS-----  
EEWIVANPELTDKTKYTITGLQTDSTRIFVRVKAVNAAGASEPKYYAQPIILVKEIEEHPKIRIPR  
HLKQTYIRRVEAVNLVIPFQ-----  
GKPRPKLSWNKNGVPVDKNEINIRNSETDTIIFIRKAERSHSGKYDLKVEVDTFVDSASIDIQI  
V-----  
DRPGPPQVVKIEDVWGENVALTWTTPPKDDGNAAITGYTIQKADKKSMEWFTVIEHYHRTNATIT  
ELVIGNEYFRVFAENMCGLSEEVMTKESAVIAKDG-----  
KVYKNPIYEDFNTEAPMFTQPLVNTYAIAGYNATLNCVSRGNPKPKITWMKNKVAIINDPRYR  
MFSNQGVTLEIRKPSPYDGGTYSCAVNELGEEIECKLEVK-----VVAQ-----

gi|118082876|ref|XP\_4 PREDICTED: similar to Myosin-binding  
protein

-----MPEPT-----KKD-----

ETETENALPPPEQKTPQDGGTEKGG-----  
-----VWSIGETAPE--EAEKRD-----  
DSQRSTLFIIEKPKQSGTVSVGGNITFIAKVEAKDLLRKNVWFKGKWM DLASKAGKHLQLKESF  
ERHT-----  
KIHTFEMHIIQAKENYAGNYRCEVSYKDKFDSCSFDLEVTSSQAAPSIDIRSAFKRSGD----  
-----GQDDAGELDFSGLLKR-----REVKQQEEEEPEVDVWELLKN-  
ANPSEYEKIAFQYGITDLRGMLKRLKRMREVKKSAAFAKGLDPAYQVDKGGKVRFMVELADPT  
VELKWKYKNGQEIRPS---  
AKYIFEHKGQRILFINNCTMTDDARYYVTAGDEKCSSTELFVRDPPILVTKGLEDTSTYVGERV  
ELSCVSEDDANVKWFKNGVELTNEPKSR--  
YRIKVEGKKHTLIIIEEAAKNDNATYSVMTTGGQSEAKLSVDLRPLKISLALEDQTVRLGQEIHL  
KCEIS-ENVEGKWKYKNGQLVEASDRVKLYHKGRIRHFIIASAAVDDEGEYMFVDPAYNI-  
NIPCKVHVVD-----PPKLHLDG-LGE-NNTVTVVAGTKLRLEIPITGEPTPKVMWSK-  
-----GDKWITD-  
SGRIRAETYS DSSCLVIDTAEREDSGPFRITLKNEAGEDSALINIKVVDVDPDPPQAPNVTEVGE  
DWCVMTWDPPANDGGSPILGYFIERKKKQSSRWMLNFELCKETTFEPKMKMIEGVAYEVRVFAV  
NAIGTSKPSMPSKSFVPLAVTSPPTLLAVDSVTDTSVTMKWRPPDHIGAAGLDGYVVEYCFEGS  
ISTDQSEELMEPPFNLEADEWIVANPELTDKTKFTITGLPTGSKILVRVKAVNAAGESEPRYHP  
QPILVKEVIEPPKIRLPRHLKQTYTRRVGETVNLVIPFQ-----  
GRPRAKVSQKNGSPIDKNQINIRNTENDTIIIFIRKAERSHSGEYDMKVEVENLVDKATIDIQI  
V-----  
DRPGPPEVVTIEDVWGENVNLSWKPPKDDGNAAITGYTIQKADKKSMEWFTVIEHYHRTSATIN  
ELVIGNEYFYFRVFAENMCGLSE DATMTKESALIAKDG-----  
KVYKYPVYDDDFDTERPLFTQPLVNTFAVAGYNATLNC SVRGNPKPKITWLKNKVAI LNDPRYR  
MFGNQGVCTLEIRKPSPYDGGTYTCRAVNELGEAEVDCKLEVK-----VIAR-----  
TLS---QVIKW-----  
gi|224095487|ref|XP\_0 PREDICTED: myosin binding protein C, slow  
typ -----  
-----MPEPT-----KKD-----  
ETENESAPPPPEQKTPQEGGNEKGG-----  
-----VWSLGE GAPE--ESEKRD-----  
DSQRSTLFIIEKPKQSGTVSVGGNITFIAKVEAKDLLRKNVWFKGKWM DLASKAGKHLQLKESF  
ERHT-----  
KIHTFEMQIIKAKENYAGNYRCEVSYKDKFDSCSFDLEVTSSQAAPSIDIRSAFKRSGE----  
-----GQEDAGELDFSGLLKR-----REVKQQEEEEPEVDVWDL LKN-  
ANPSEYEKIAFQYGITDLRGMLKRLKRMREP KKSAAFAKGLDPAYQVDKGGKVRFMVELADPT  
VELKWKYKNGQEIRPS---  
AKYIFEHKGQRILFINNCTMTDDARYYVTAGDEKCSSTELFVRDPPILVTKGLEDTSTYVGERV  
ELSCVSEDDANVKWFRNGVELSNDPKSR--  
YRIKVEGKKHTLVIEEAAKNDTATYSVMTTGGQSEAKLSVDLRPLKISLALEDQTVRLGQEIHL  
KCEIS-ENVEGKWKYKNGQLIEASDRVKLYHKGRIRHFVIVSAVDDEGEYMFVDPAYNI-  
NIPCKVHIVD-----PPKLHLDG-LGE-NNTVTVVAGNKLRLLEIPITGEPPP KVFWSR-  
-----  
GDKVPCHYSGRIRAESYPDSSCLVIDAAEREDSGPFRITLKNEAG EDTALINIKVVDVDPDPPQA  
PNVTEVGEDWCIMTWEPPANDGGSPILGYFIERKKKQSSRWMLNFELCKETTFEPKMKMIEGVA  
YEVRVFAVNAIGMSKPSMPSKSFVPLAVTSPPTMLAVDSVTDTSVTMKWRPPDQIGAAGLDGYV  
VEYCFEGSISTDLSEDLGEPFNLEADEWIVANPELTDKTKFTINGLPTGSKILVRVKAVNAAG

ESEPKYHPQPILVKEVIEPPKIRLPRHLKQTYTRRVGETVNLVIPFQ-----  
GKPRAKVSWEKNGSPIDKNDINIRNTEQDTIIFIRKAERGHSGEYDMKVEVENLVDKATIDIQI  
I-----  
DRPGPPEVVTIEDVWGENVNLSWKPPKDDGNAAITGYTIQKADKKSMEWFTVIEHYHRTSATIN  
ELVIGNEYFRVFAENMCGLSEDATMTKESALIAKDG-----  
KVYKYPVYDDFDFSERPLFTQPLVNTFAVAGYNATLNCSVRGNPKPKITWMKNKVLIMNDPRYR  
MFSNQGVCTLEIRKPSPYDGGTYTCRAVNELGAEVDCKLEVR-----  
VIYHGVINPGEPLSLAGDNQVYNAPFGVSQKKLRSHYVHDKTCERGVSGTRQGAGESGTRSPRR  
DERGAHGRLSPG  
gi|55925504|ref|NP\_00 myosin binding protein C, slow type [Danio  
re -----  
-----MPEPT-----KKD-----  
DGQPEEDGSTPKKLSIDLPNDSPESTRGRKDS-----  
-----VWSLGDGQPP-EEIDKQTE-----  
NPPLSTLLIEKPQSGSITVGGDITFIAKVEAKDLLRKPTVKWFKGKWMDLASKTGKHLQLKESF  
ERLS-----  
KIHTFEMHIIKAKENYAGNYRCEVITYKDKFDSFDFLEVKEVPEVSQSIDIRSAFKRSSE----  
-----GQDDAGELDFSGLLKHRHG-----REVK-QEETPEVDVWEILKN-  
ARPDEYEKIAFTYGITDLRGLLKRLLKTKKEEKSEAFAKRLEPAYQVDKGGKIRLIVDLADPT  
VELKWKYKNGQEIRPTPNRKFIFEHKGQORIMVINNCQMSDDAAYSVTAGEEKCTTELFVKELP  
VNIVKELEPVKTTVNERIELECEVSEEGAKVKWMKNGVEVPTGVRSR--  
YRVKSEGTKHWLIIDDASKDDTGTYSMATGGTSQAHVQVDLPLKVLMDLQSVTVLLGQPLKL  
NCEIYPGNVPGRWYKNGQLVQPNDRISITHKTKNHSLDVESSTIHDAGDYTFVPEGYTQ-  
TLSAKVHIID-----PPRVHLEA-LNVQDNTVTIVAGNKLRLLEIPISGEPAPRVVWMK-  
-----  
GERVILDTGSRVHAETFADHTCLTIDITEREDTGNKIVLQNEAGEDTASVKVKVVDIPDPPEA  
PLVTEVGGDWCTMTWEPPRYDGGSPILGYFIERKKKQSSRWMRLNFDLCKETTFEPKMIIEGVP  
YEVRIFAVNAIGVSKPSEPSKPFIPLAVTSEPTMLVVDDVTDTTVTMKWRPDTIGAAGLDGYQ  
IEYCIIEGT-----  
DDWIVANKELTKKTKYTITGLPVEAKILVRVKAINAAGASQPRTTQHSILVKEVIEPPKIRIPR  
HLKQTYIRKVGEVVNLVVPFV-----GKPRPKVTWLKEGQPIDP-  
TISIRNSDCDSIMFIRKAERKHSGKYELSVQVENHIDTAMLDIQIV-----  
-----  
DLPGPPQAVKIEEIWGNVALDWSPPKDSGNAPITGYTIQKADKKTMEWYTCVEHYHRTCITIS  
DLVVGNEYFFRIYSENMVGLSEDATATKDSALIVKEG-----  
LHLKNPEYNDRDFTEPPRFTQPLINTFAIAGYNATLNCSVRANPRPKVVMKNKITIIDDPYR  
MFHNQGVCTLEIRKPSPFDDGGVYTCKAVNDLGEAQVDCKLEVKGFTFFELMKRGVPLHLIDKY  
MNESKTSESEKKGSD-----

*Alignment 2 (MYBPC3 for MrBayes)*

#NEXUS

begin data;

dimensions ntax=50 nchar=1274;

format datatype=protein missing=? gap=- matchchar=.;

matrix

Human\_cardiac\_myosin\_bin

MPEPGKKPVSAFSSKPRSV E VAAGSPAVFEAETERAGVKVRWQRGGSDISASNKYGLATEGTRH  
TLTVREVGPADQGSYAVIAGSSKVKFDLKVIEAEKAEPMLAPAPAPAEATGAPGEAPAPAAELG  
ESAPSPKGS S SAALNGPTPGAPDDPIGLFVMRPQDGEVTVGGSTITFSARVAGASLLKPPVVKWF  
KGKWVDLSSKVGQHLQLHDSYDRASKVYLFELHITDAQPAFTGSYRCEVSTKDKFDCSNFNLT  
HEAMGTGDLDLLSAFRRTSLAGGRRISDSHEDTGILDFSSLLKKSSSFRTPRDSKLEAPAEED  
VWEILRQAPPSEYERIAFYQGVTDLRGMLKRLKGMRRDEKKSTAFQKKLEPAYQVSKGHKIRLT  
VELADHDAEVKWLKNGQEIQMSGSKYIFESIGAKRTLTI SQCSLADDAAYQCVVGGEKCS TELF  
VKEPPVLI TRPLEDQLVMVGQRVEFECEVSEEGAQVKWLKDGVELTREETF KYRFFKKGQRHHL  
IINEAMLEDAGHYALCTSGGQALAE L I VQEKKLEVYQSIADLMVGA KDQAVFKCEVSDENVRGV  
WLKNGKELVPDSRIKVSHIGRVHKLTI DDVTPADEADYSFVPEGFACNLSAKLHFMEVKIDFVP  
RQEPKIHLDPCGRI PDTIVVVAGNKLRLDVPISGDPAPT VIWQKAITQGNKAPARPAPDAPED  
TGDSDEWVFDKLLCETEGRVRVETTKDRSIFTVEGA E KEDEGVYTVTVKNPVGEDQVNLT VKV  
IDVPDAPAAPKISNVGEDSCTVQWEPPAYDGGQPILGYILERKKKSYRWMRLNFDLIQEL SHE  
ARRMIEGVVYEMRVYAVNAIGMSRSPASQPFMPIGPPSEPTHLAVEDVSDTTVSLKWRPPERV  
GAGGLDGYSVEYCPEGCSEWVAALQGLTEHTSILVKDLPTGARLLFRVRAHNMAGPGAPVTTTE  
PVTVQEI LQRPRQLPRHLRQTIQKKVGE PVNLLIPFQ GKPRPQVTWTKEGQPLAGEEVSIRNS  
PTDITILFIRAARRVHSGTYQVTVRIENMEDKATLVLQVVDKPSPPQDLRVTDAWGLNVALEWKP  
PQDVGNT ELWGYTVQKADKKTMEWFTVLEHYRRTHCVPELIIGNGYFRVFSQNMVGFSDRAA  
TTKEPVFI PRPGITYEPPNYKALDFSEAPSFTQPLVNRSVIAGYTAMLC CAVRGS PKPKISWFK  
NGLDLGEDARFRMFSKQGVLTLEIRKPCPF DGGIYVCRATNLQGEARCECRLEVRVPQ

Q2Q1P6\_Canis\_lupus\_Cardi

MPEPGKKPVSAFSSKPRSAEVAAGSPAVFEAETERSGVKVRWQRGGSDISASDKYGLAAEGTRH  
TLTVRDVGPADQGSYAVIAGSSKVKFDLKVIEAEKAESVPAPAPAPAEAPGAPGEALASATEEK  
GGSSSPEGSSSAAPDG--  
SGAPDDPIGLFVMRPQDGEV TAGGSITFSARVAGASLLKPP TVKWFKGKWVDLSSKAGQHLQLH  
SSYDRTSKVYLFELHITDAQPTSAGGYRCEVSTKDKFDCSNFNLT VHEAVGPGDLDLRSAFRRT  
SLAGSGRRISDSHEDAGTLD FSSLLKKRDSFR--  
RDSRLEAPAEEDVWEILRQASPSEYERIAFYQHGVTDLRGMLKRLKGMKRDEKKSTAFQKKLEPA  
YQVSKGHKIRLTVELADPDADV KWLKNGQEIQMSGSKYIFESV GAKRTLTI SQCSLADDAAYQC  
VVGGEKCS TELFVKEPPVLI TRPLEDQLVMVGQRVEFECEVSEEGAQVKWLKDGVELTREETF K  
YRFFKKGQRHHLIINEATLEDAGHYALRTSGGQALAE L I VQEKKLEVYQSIADLT V GAKDQAVF  
KCEVSDENVRGVWLKNGKELVPDSRIKVSHIGRVHKLTI DDVTPADEADYSFVPEGFACNLSAK

LHFMEVKIDFVPRQEPPKIHLDPCGRKPDTIVVVAGNKLRLDVPISGDPAPTVIWQKTITQKNK  
VPAGPAPDASGDAAASDEWVFDKLLCETEGRVVRVETTKDRSIFTVEGAKEKEDEGVYVVTVKNP  
VGEDQVNLTVKVIDVDPDAPAAPKISNVGEDSCTVQWEPAYDGGQPVLGYILERKKKKSyrWMR  
LNFDLLRELSHEARMIEGVVYEMRVYAVNAIGMSRSPASQPFMPIGPPSEPTHLAVEDVTD  
TVSLKWRPPERAGAGGLDGYVVEYCREDCSEWVTALQGLTEHTAVLVKDLPTGARLQFRVRAHN  
MAGPGAPVTTQEPVTVQEIILQRPRLQLPRHLRQTIQRKVGEPVNLLIPFQGKPRPQVTWTKEGQ  
PLAGEEVSIRNSPTDTILFIRAAHRAHSGTYQVMLRIENMEDKATLVLQIVDKPSPPPQDIRVAE  
AWGFNVALEWKPPQDYGNTEIWGYTVQKADTKMEWFTVLEHYRRTHCVVSELIIGNGYFRVF  
SHNMVGPSDKAATTKEPVFIIPRPGITYEPPSYKALDFSEAPSFTPLVNRSVIAGYNATLCCAV  
RGSPPKPKISWFKNGLDLGDARFRMFSKQGVLTLEIRKPCPFDDGGIYVCRAINLQGEAQCECRL  
EVRVPQ

UPI0000EB1703\_Canis\_lupu

MPEPGKKPVSAFSSKPRSAEVAAGSPAVFEAETERSGVKVRWQRGGSDISASDKYGLAAEGTRH  
TLTVRDVGPADQGSYAVIAGSSKVKFDLKVIEAEKAESVPAPAPAPAEAPGAPGEALASATEEK  
GGSSSPEGSSSAAPDG--

SGAPDDPIGLFVMRPQDGEVTAGGSITFSARVAGASLLKPPTVKWFKGKWVDLSSKAGQHLQLH  
SSYDRTSKVYLFELHITDAQPTSAGGYRCEVSTKDKFDSCNFNLTVHEAVGPGDLDLRSAFRRT  
ANAGAGGPLGDSHEDAGTLDFFSLLKKSSSFR--

RDSRLEAPAEEDVWEILRQASPSEYERIAFQHGVTDLRGMKRLKGMKRDEKKSTAFQKKLEPA  
YQVSKGHKIRLTVELADPDADVWLKNGQEIQMSG-

RYIFESVGAKRTLTISQCSLADDAAYQC VVGGEKCSTELFVKEPPVLI TRPLEDQLVMVGQRVE  
FECEVSEEGAQVKWLKDGVELTREETFKYRFFKDGQRHHLI INEATLEDAGHYALRTSGGQALA  
ELIVQEKKLEVYQSIADLTVGAKDQAVFKCEVSDENVRGVWLKNGKELVPDSRIKVSHIGRVHK  
LTIDDVTPADEADYSFVPEGFACNLSAKLHFMEVKIDFVPRQEPPKIHLDPCGRKPDTIVVVAG  
NKLRLDVPISGDPAPTVIWQKTITQKNKVPAGPAPDASGDAAASDEWVFDKLLCETEGRVVRVE  
TTKDRSIFTVEGAKEKEDEGVYVVTVKNPVGEDQVNLTVKVIDVDPDAPAAPKISNVGEDSCTVQW  
EPPAYDGGQPVLGYILERKKKKSyrWMLNFDLLRELSHEARMIEGVVYEMRVYAVNAIGMSR  
PSPASQPFMPIGPPSEPTHLAVEDVTDTTVSLKWRPPERAGAGGLDGYVVEYCREDCSEWVTAL  
QGLTEHTAVLVKDLPTGARLQFRVRAHNMAGPGAPVTTQEPVTVQEIILQRPRLQLPRHLRQTIQ  
RKVGEPVNLLIPFQGKPRPQVTWTKEGQPLAGEEVSIRNSPTDTILFIRAAHRAHSGTYQVMLR  
IENMEDKATLVLQIVDKPSPPPQDIRVAEAWGFNVALEWKPPQDYGNTEIWGYTVQKADTKMEW  
FTVLEHYRRTHCVVSELIIGNGYFRVFSHNMVGPSDKAATTKEPVFIIPRPGITYEPPSYKALD  
FSEAPSFTPLVNRSVIAGYNATLCCAVRGSPPKPKISWFKNGLDLGDARFRMFSKQGVLTLEI  
RKPCPFDDGGIYVCRAINLQGEAQCECRLEVRVPQ

A9JR55\_Mus\_musculus\_Mybp

MPEPGKKPVSAFNKKPRSAEVTAGSAAVFEAETERSGVKVRWQRDGS DITANDKYGLAAEGKRH  
TLTVRDAGPDDQGSYAVIAGSSKVKFDLKVTEPEKAE--SEV-----

APEAPKEVPAPATELEESVSSPEGSVSVTQDGS HQGAPDDPIGLFLMRPQDGEVTVGGSI VVSA  
RVAGASLLKPPVVKWFKGKWVDLSSKVGQHLQLHDSYDRASKVYLFELHITDAQTT SAGGYRCE  
VSTKDKFDSCNFNLTVHEAIGSGDLDLRSAFRRTSLAGAGRRTSDSHEDAGTLDFFSLLKKRDS  
FR--

RDSKLEAPAEEDVWEILRQAPPSEYERIAFQHGVTDLRGMKRLKGMKQDEKKSTAFQKKLEPA  
YQVNKGHKIRLTVELADPD AEVKWLKNGQEIQMSGSKYIFESVGAKRTLTISQCSLADDAAYQC  
VVGGEKCSTELFVKEPPVLI TRSLEDQLVMVGQRVEFECEVSEEGAQVKWLKDGVELTREETFK  
YRFFKDGGRKHLI INEATLEDAGHYAVRTSGGQSLAELIVQEKKLEVYQSIADLAVGAKDQAVF  
KCEVSDENVRGVWLKNGKELVPDNRIKVSHIGRVHKLTIIDDVTPADEADYSFVPEGFACNLSAK  
LHFMEVKIDFVPRQEPPKIHLDPCGSTPDTIVVVAGNKLRLDVPISGDPAPT VVWQKT VTOGKK

ASAGPHPDAPEDAGADEEWFVFDKLLCETEGRVRVETTKDRSVFTVEGAKEKEDEGVYTVTVPKNP  
VGEDQVNLTVKVIDVPDAPAAPKISNVGEDSCTVQWEPPAYDGGQPVLGYILERKKKKSyrWMr  
LNFdLLRELSHEARRMIEGVAYEMRVYAVNAVGMsrPSPASQPFMPiGPPGEPthLAVEDVSDT  
TVSLKWRPPERVGAGGLDGYsVEYCQEGCSEWTPALQGLTERTSMLVKDLPTGARLLFRVRAHN  
VAGPGGPiVTKEPVTVQeILQRpRLQLPRHLRQTIQKKVGEpVNLLiPFQgKPRPQVtWTKEGQ  
PLAGEEVSIRNSPTDtiLFIraARrTHSGTYQVTVRIENMEDKATLILQIVDKPSPPQDIRIVE  
TWGFNVALEWKPPQDDGNTeIWGYTVQKADKKtMEWfTVLEHYRRthCVVSELIIGNGYyFRVf  
SHNMVGSsdKAAATKEpVFiPRPGITyEPPKYKALDFSEAPsFTQPLANRSIIAGYNAILCCA  
VrgSPKPKISWfKNGLDLGEDARFRMFCKQGVLTLEIRKPCPYDGGVYVCRATNLQGEAQCECRL  
EVRVPQ

A2AGQ1\_Mus\_musculus\_Myos

MPEPGKKPVSAFNNKKPRSAEVTAGSAAVFEAETERSGVKVRWQRDGSditANDKYGLAAEGKRH  
TLTVRDASpDDQGSyAVIAGSSKVKFDLKVTEPEKAE--SEV-----

APGAPKEVPAPATELEESVSSPEGSVSVTQDGSHQGAPDDPIGLFLMRPQDGEVTVGGsIVFSA  
RVAGASLLKPPVVKWfKGKwVdLSSKVGQHLQLHDSYDRASKVYLFELHITDAQTTSAGGYRCE  
VSTKDKFDSCNFNLTVHEAIGSGDLDLRSaFRRTSLAGAGRRTSDSHEDAGTLDFSSLLKSSS  
FR--

RDSKLEAPAEEDVWEILRQAPPSEYERIAfQHGVTDLRgMLKRLKGMKQDEKKStAFQKKLEPA  
YQVNKGHKIRLTVELADpDAEVKWLKNGQeIQMSGsKYIFESVgAKRTLTISQCSLADDAAYQC  
VVGGEKcSTELfVKEPPVLItrSLEDQLVMVGQRVEFECEVSEEGAQVKWLKdGVELTREETfK  
YRFKKDGRKHHLIINEATLEDAGHYAVRTSGGQSLAEliVQEKKLEvyQSIADLAVGAKDQAVF  
KCEVSDENVRGVWLKNGKELVpDNRIKvSHIGRVHKLTIddVTPADEADYSfVPEGFACNLSAK  
LHFMEVKIDfVPRQePPKIHLDCPGSTPDTIVVvAGNKLRLdVPIsgDPAPTvvWQKTvtQGKK  
ASTGPHPDAPEDAGADEEWFVFDKLLCETEGRVRVETTKDRSVFTVEGAKEKEDEGVYTVTVPKNP  
VGEDQVNLTVKVIDVPDAPAAPKISNVGEDSCTVQWEPPAYDGGQPVLGYILERKKKKSyrWMr  
LNFdLLRELSHEARRMIEGVAYEMRVYAVNAVGMsrPSPASQPFMPiGPPGEPthLAVEDVSDT  
TVSLKWRPPERVGAGGLDGYsVEYCQEGCSEWTPALQGLTERTSMLVKDLPTGARLLFRVRAHN  
VAGPGGPiVTKEPVTVQeILQRpRLQLPRHLRQTIQKKVGEpVNLLiPFQgKPRPQVtWTKEGQ  
PLAGEEVSIRNSPTDtiLFIraARrTHSGTYQVTVRIENMEDKATLILQIVDKPSPPQDIRIVE  
TWGFNVALEWKPPQDDGNTeIWGYTVQKADKKtMEWfTVLEHYRRthCVVSELIIGNGYyFRVf  
SHNMVGSsdKAAATKEpVFiPRPGITyEPPKYKALDFSEAPsFTQPLANRSIIAGYNAILCCA  
VrgSPKPKISWfKNGLDLGEDARFRMFCKQGVLTLEIRKPCPYDGGVYVCRATNLQGEAQCECRL  
EVRVPQ

B2FDF4\_Mus\_musculus\_Myos

MPEPGKKPVSAFNNKKPRSAEVTAGSAAVFEAETERSGVKVRWQRDGSditANDKYGLAAEGKRH  
TLTVRDASpDDQGSyAVIAGSSKVKFDLKVTEPEKAE--SEV-----

APGAPKEVPAPATELEESVSSPEGSVSVTQDGSHQGAPDDPIGLFLMRPQDGEVTVGGsIVFSA  
RVAGASLLKPPVVKWfKGKwVdLSSKVGQHLQLHDSYDRASKVYLFELHITDAQTTSAGGYRCE  
VSTKDKFDSCNFNLTVHEAIGSGDLDLRSaFRRTSLAGAGRRTSDSHEDAGTLDFSSLLK-  
SSFR--

RDSKLEAPAEEDVWEILRQAPPSEYERIAfQHGVTDLRgMLKRLKGMKQDEKKStAFQKKLEPA  
YQVNKGHKIRLTVELADpDAEVKWLKNGQeIQMSGsKYIFESVgAKRTLTISQCSLADDAAYQC  
VVGGEKcSTELfVKEPPVLItrSLEDQLVMVGQRVEFECEVSEEGAQVKWLKdGVELTREETfK  
YRFKKDGRKHHLIINEATLEDAGHYAVRTSGGQSLAEliVQEKKLEvyQSIADLAVGAKDQAVF  
KCEVSDENVRGVWLKNGKELVpDNRIKvSHIGRVHKLTIddVTPADEADYSfVPEGFACNLSAK  
LHFMEVKIDfVPRQePPKIHLDCPGSTPDTIVVvAGNKLRLdVPIsgDPAPTvvWQKTvtQGKK  
ASTGPHPDAPEDAGADEEWFVFDKLLCETEGRVRVETTKDRSVFTVEGAKEKEDEGVYTVTVPKNP

VGEDQVNLTVKVIDVDPDAPAAPKISNVGEDSCTVQWEPPAYDGGQPVLGYILERKKKKSyrWMr  
LNFDLLRELSHEARRMIEGVAYEMRVYAVNAVGMsrPSPASQPFMPiGPPGEPthLAVEDVSDT  
TVSLKWRPPERVGAGGLDGYsVEYcQEGcSEWTPALQGLTERTSMLVKDLPTGARLLFRVRAHN  
VAGPGGPiVTKEPVTVQeILQRpRLQLPRHLRQTIQKKVGEpVNLLiPFQgKPRPQVtWTKEGQ  
PLAGEEVSIRNSPTDTILFIRAARRTHSGTYQVTVRIENMEDKATLILQIVDKPSPPQDIRIVE  
TWGFNVALEWKPPQDDGNTeIWGYTVQKADKKTMEWFTVLEHYRrTHcVvSELIIGNGYYFRVf  
SHNMVGSsDKAAATKEpVFIpRPGITyEPPKYKALDFSEAPsFTQPLANRSIIAGYNAILCCAV  
RGSPPKISWfKNGLDLGEDARFRMfCKQGVLTLEIRKPCPYDGGVYVCRATNLQGEAQCECRl  
EVRVPQ

Q0VD56\_Bos\_taurus\_Myosin

MPEPGKKPVSAFskKPRsAEVAAGSSAVFEAEterAGLkVRWQRAGSDISASDKYSLAAEGTRH  
TLTVRDVGPADQGSyAVIAGSSKVKFDLKVVDAGKAEPVSAPAPAPTEAPGAPGEAPtsAPEVE  
AGAPSPeeSSAAPEg--

PSAPGDPIGLFVMRPQDGEVTVGGTITFSARVAGASLLKPPVVKWfKGKwVDLSSKVGQHLQLH  
DSYDRtSKVYLFELRIMDAQTTfAGGYRCEVSTKDKFDSCNFNLTVHEAVGPGDvDLRSTFRRT  
SLAGGSRRISDSHEDAGTLDFSSLLRKS-SLR---

TPRLEAPAEEDVWEILRQAPPSEYERIAfQHGvTDLRGMLKRLKGIKRDEKKSTAFQKKLQPAY  
QVSKGHKIRLMVELADPDAEVKWLKNGQeIQMSGsKYIFESIGAKRTLTISQCSLADDAAYQCv  
VGGEKcSTELfVKEPPVLItrPLEDQLVMVGQRVEFECEVSEEGAQVKWLKDGVELTREETFky  
RFKKDgQKHHLIINEATLEDAGHYALRTSGGQALAEliVQEKKLEVYQSIADLTVGSKDQAVfK  
CEVSDENVRGVWLKNGKELVPDSRIKvSHIGRVHKLTI DDVTPADEADYSFVPEGFACNLSAKL  
HFMEVKIDFVPRQEPpKIHLDCPGRVPDTIVVvAGNKLRLDVPISGDPAPTviWQKAITKGNKV  
PAGPAPDASEESGAGDEWVFDKLLCETEGRVRVETTKDRSIFtVEGAEREDEGVYVvTVKNPv  
GEDQVSLTVKVIDVDPDAPAapeISKVGEDSCTVCWEPPAYDGGQPVLGYILERKKKKSyrWMrL  
NFDLLRELSHEARRMIEGViyEMRVYAVNAVGMsrPSPASQPFMPiGPPSEpThLAVEDISDTT  
VSLKWRPPERAGAGGLDGYsVEYrREGSSAWVSALPGLIERTSLLVKDLPTGARVLFRVRAHNL  
AGAGPPVTTKEPVTVQeLLQRpRLQLPRHLRQTIQKKVGEpVNLLiPFQgKPRPQVtWTKEGQP  
LAGEEVSIRNSPTDTILFIRAAHRAHSGTYQVTLRVEDMEDKAQLVLQVVDKPSPPQDIQVAEA  
WGFNVALEWKPPQDDGNTelWGYTVQKADKKTMEWFTVLEHYRrTHcVvSELIIGNSYYFRVfS  
HNTVGPSDTAATtKEPVLiPRPGITyELPKYKALDFSEAPsFTRPLVNRsvIAGYNtTLCCAVR  
GSPKPKISWfKNGLDLgKDARFRMfSKQGVLTLEIRKPCPFdGGIYACRATNLEGEAQCECRle  
VRVPQ

Q3UIK0\_Mus\_musculus\_Puta

MPEPGKKPVSAFnkKPRsAEVtAGSAAVFEAEterSGVkVRWQRDGSdITANDKYGLAAEGKRH  
TLTVRDASPDDQGSyAVIAGSSKVKFDLKVTEPEKAE--SEV-----

APGAPKEVPAPATELEESVSSPEGSVSVTQDGSHQGAPDDPIGLFLMRPQDGEVTVGGSIVFSA  
RVAGASLLKPPVVKWfKGKwVDLSSKVGQHLQLHDSYDRASKVYLFELHITDAQTTSAGGYRCE  
VSTKDKFDSCNFNLTVHEAIgSGDLDLRSaFRRTSLAGAGRRTSDSHEDAGTLDFSSLLKKRDS  
FR--

RDSKLEAPAEEDVWEILRQAPPSEYERIAfQHGvTDLRGMLKRLKGMKQDEKKSTAFQKKLEPA  
YQVNKGHKIRLTVELADPDAEVKWLKNGQeIQMSGsKYIFESVgAKRTLTISQCSLADDAAYQC  
VVGGEKcSTELfVKEPPVLItrSLEDQLVMVGQRVEFECEVSEEGAQVKWLKDGVELTREETFk  
YRFKKDGRKHHLIINEATLEDAGHYAVRTSGGQSLAEliVQEKKLEVYQSIADLAVGAKDQAVf  
KCEVSDENVRGVWLKNGKELVPDNRIKvSHIGRVHKLTI DDVTPADEADYSFVPEGFACNLSAK  
LHFMEVKIDFVPRQEPpKIHLDCPGSTPDTIVVvAGNKLRLDVPISGDPAPTvvWQKTvtQgKK  
ASTGPHPDAPEDAGADEEWVFDKLLCETEGRVRVETTKDRSVFtVEGAeKEDEGVYTVTVKNP  
VGEDQVNLTVKVIDVDPDAPAAPKISNVGEDSCTVQWEPPAYDGGQPVLGYILERKKKKSyrWMr



LNFDLLRELSHEARRMIEGVAYEMRVYAVNAVGMSRSPASQPFMPIGPPGEPHTLAVEDVSDT  
TVSLKWRPPERVGAGGLDGYVEYCQEGCSEWTPALQGLTERTSMLVKDLPTGARLLFRVRAHN  
VAGPGGPIVTKEPVTVQEILQRPRQLPRHLRQTIQKKVGEFVNLLIPFQGKPRPQVTWTKEGQ  
PLAGEEVSIRNSPTDTILFIRAARRTHSGTYQVTVRIENMEDKATLILQIVDKPSPPQDIRIVE  
TWGFNVALEWKPPQDDGNTIEWGYTVQKADKKTMEWFTVLEHYRRTHCVVSELIIGNGYFRVF  
SHNMVGSDDKAAATKEPVFI PRPGITYEPPKYKALDFSEAPSFTQPLANRSIIAGYNAI LCCA  
V RGS PKPKISWFKNGLDLGEDARFRMFCKQGVLTLEIRKPCPYDGGVYVCRATNLQGEAQCECRL  
EVRVPQ

UPI0000DC0477\_R\_norvegi

MPEPGKRPVSAFTKKPRSEVTAGSAAVFEAETERSGLKVQWQRDGS DIAANDKYGLAAEGKRH  
TLTVRDVGPDDQGSYAVIAGSSKVKFDLKVTEPEKAE--  
SAVAPTSMEAPETPKEVPALATQLEGNVSSPEGSVSVTQDGS SQGAPDDPIGLFLMRPQDGEVT  
VGGSI VFSARVAGASLLKPPVVKWFKGKWVDLSSKVGQHLQLHDSYDRASKVYLFELHITDAQA  
TSAGGYRCEVSTKDKFDSCNFNLTVHEAIGSGDLRLSAFRRTSLAGTGRRTSDSHEDAGTLDF  
SSLLKSSSFR--  
RDSKLEAPAEEDVWEILRQAPPSEYERIAFQHGVTDLRGMLKRLKGMKHDEKKSTAFQKKLEPA  
YQVNKGHKIRLTVELADPDAEVKWLKNGQEI QMSG-  
RYIFESIGAKRTLTISQCSLADDAAYQC VVGGEKCS TELFVKEPPVLITRSLDQLVMVGORVE  
FECEVSEEGAQVKWLKDGVELTREETF KYRFFKDG RKHHLI INEATLEDAGHYAVRTSGGQALA  
ELIVQEKKLEVYQSIADLAVGAKDQAVFKCEVSDENVRGVWLKNGKELVPDNRIKVSHIGRVHK  
LTIDDVTPADEADYSFVPEGFACNLSAKLHFMEVKIDFVPRQEPKIHLDPCGSTPDTIVVVAG  
NKLRLDVPI SGPDPAPTIVWQKTITQGGKASAGPPP GAPEDAGADEEWFV DKKLLCETEGRVRVE  
TTKDRSVFTVEGAKEKEDEGVYTVTVKNPVGEDQVNLTVKVIDVPDAPAA PKI SNVGEDSCIVQW  
EPPAYDGGQPVLGYILERKKKSYRWMRLNFDLLRELSHEARRMIEGVAYEMRVYAVNAVGMSR  
PSPASQPFMPIGPPGEPHTLTVEDVSDTTVSLKWRPPERVGAGGLDGYVEYCQEGCSEWVTAL  
QGLTERTSLLVKDLPTGARLLFRVRAHNVAGPGGPIITKEPVTVQEILQRPRQLPRHLRQTIQ  
KKVGEFVNLLIPFQGKPRPQVTWTKEGQPLAGEEVSIRNSPTDTILFIRAARRTHSGTYQVTVR  
IENMEDKATLVLQIVDKPSPLDIRVVETWGFVVALEWKPPQDDGNTIEWGYTVQKADKKTMEW  
FTVLEHYRQTHCVVSELIIGNGYFRVFSHNMVGSDDRAAATKEPIFI PRPGITYEPPKYKALD  
FSEAPSFTQPLTNRSIIAGYNAI LCCAVRGS PKPKISWFKNGLDLGEDARFRMFCKQGVLTLEI  
RKPCPYDGGVYVCRATNLQGEAQCECRLEVRVPQ

UPI000179E0E8\_Bos\_taurus

MPEPGKKPVSAFSSKPRSAEVAAGSSAVFEAETERAGLKVWRVQRAGSDI SASDKYSLAAEGTRH  
TLTVRDVGPADQGSYAVIAGSSKVKFDLKVVDAGKAE PVSAPAPAPTEAPGAPGEAPTSAPEVE  
AGAPSPPESSAAPEG--  
PSAPGDP IGLFVMRPQDGEVTVGGTITFSARVAGASLLKPPVVKWFKGKWVDLSSKVGQHLQLH  
DSYDRTSKVYLFELRIMDAQTTFAGGYRCEVSTKDKFDSCNFNLTVHEAVGPGVDL RSTFRRT  
SLAGGSRRISDSHEDAGTLDFSSLLRKS-SLR---  
TPRLEAPAEEDVWEILRQAPPSEYERIAFQHGVTDLRGMLKRLKGIKRDEKKSTAFQKKLQPAY  
QVSKGHKIRLMVELADPDAEVKWLKNGQEI QMSGSR YIFESIGAKRTLTISQCSLADDAAYQC  
VVGGEKCS TELFVKEPPVLITRPLEDQLVMVGORVEFECEVSEEGAQVKWLKDGVELTREETF KY  
RFFKDGQKHHLI INEATLEDAGHYALRTSGGQALAE LIVQEKKLEVYQSIADLTVGSKDQAVFK  
CEVSDENVRGVWLKNGKELVPDSRIKVSHIGRVHKL TIDDVTPADEADYSFVPEGFACNLSAKL  
HFMEVKIDFVPRQEPKIHLDPCGRVPDTIVVVAGNKLRLDVPI SGPDPAPTIVWQKAITKGNKV  
PAGPAPDASEESGAGDEWVFDKLLCETEGRVRVETTKDRSIFTVEGAEREDEGVYVTVKNPV  
GEDQVSLTVKVIDVPDAPAAPEISKVGEDSCTVCWEPPAYDGGQPVLGYILERKKKSYRWMRL  
NFDLLRELSHEARRMIEGVYEMRVYAVNAVGMSRSPASQPFMPIGPPSEPTHLAVEDISDTT

VSLKWRPPERAGAGGLDGYSVEYRREGSSAWVSALPGLIERTSLLVKDLPTGARVLFVRVRAHNL  
AGAGPPVTTKEPVTVQELLQRPRLQLPRHLRQTIQKKVGEVNVLLIPFQGKPRPQVTWTKEGQP  
LAGEEVSIRNSPTDTILFIRAAHRAHSGTYQVTLRVEDMEDKAQLVLQVVDKPSPPQDIQVAEA  
WGFNVALEWKPPQDDGNTELWGYTVQKADKKTMEWFTVLEHYRHTHCVVSELIIGNSYFRVFS  
HNTVGPSDTAATTKEPVLI PRPGITYELPKYKALDFSEAPSFTRPLVNRSVIAGYNTTLCCAVR  
GSPKPKISWFKNGLDLGKDARFRMFSKQGVLTLEIRKPCPFDDGGIYACRATNLEGEAQCECRLE  
VRVPQ

UPI0001796E3C\_E\_caballu

MPEPGKPVSAFASKKPRSAEVAAGSPAVFEAETERAGLKVRWQRAGSDISASDKYGLAAEGTRH  
TLTVRDVGPADQGSYAVIAGSSKVKFDLKVIEPEKTEPVPSPAPTPAEAPGAPREALASATEAE  
GGSPSPEGSSAAPDG--  
PGAPDDPIGLFVMRPQDGEVTVGGSITFSARVAGASLLKPPMVKWFKGKVVLDLSSKVGQHLQLH  
DSYDRASKVYLFELHITDAQATFTGGYRCEVSTKDKFDSCNFNLTVHEAIGPGDLDLRSFRRT  
-----

DSRLEAPAEEDVWEILRQAPPSEYERIAFQHGITDLRGMLKRLKGMRRDEKKSTAFQKKLEPAY  
QVSKGHKIRLTVELANPDAEVKWLKNGQEIQMSGSKYIFESIGAKRTLTISQCSLADDAAYQCV  
VGGEKCSSTELFVKEPPVLI TRPLEDQLVMVGQRVEFECEVSEEGAQVKWLKDGVELTREETFKY  
RFKKDGRHHLI INEATLEDAGHYALHTSGGQALAEELIVQEKKLEVYQSIADLTVGAKDQAVFK  
CEVSDENVRGVWLKNGKELVPDSRIKVVSHIGRVHKLTI DDVTPADEADYSFVPEGFASNLSAKL  
HFMEVKIDFVPRQEPKIHLDPCGRVPDTIVVVAGNKLRLDVPI SGDPAPTWTWQKTITQGNKV  
PAGPAPDAPGDAGASDEWVFDKLLCETEGRVRVETTKDRSVFTLEGAKEKEDEGVYIVTVKNPV  
GEDQVNLTVKVIDVPDAPAAPKISNVGEDSCTVQWEPAYDGGQPILGYILERKKKSYRWMRL  
NFDLLRELSLEAKRMIEGVVYEMRVYAVNAIGMSRPSPASQPFMPIGPPSEPTHLAVEDVSDTT  
VSLKWRPPERVAGAGGLDGYSVEYCREGGSEWVAALQGLTEHTSLLVKDLPTGARLLFRVRAHNV  
AGPGAPVTTKEPVTVQELLQRPRLQLPRHLRQTIHRRVGEVNVLLIPFQGRPRPQVTWTKEGQP  
LAGEEVSIRNSPTDTILFIRAAARRTHSGTYQVTLRIENMEDEATLVLQIVDKPSPPQDIRVAEA  
WGFNVALEWKPPQDDGNTEIWGYTVQKADKKTMEWFTVLEHYRRTHCVVSELIIGNGYFRVFS  
HNMVGPSDKAATTKEPVFI PKAGITYESPSYKALDFLEAPSFTRPLVNRSVIAGYNATLSCAVR  
GSPKPNISWFKNGLDLRDDARFRFTFSKQGLLTLEIRKPCPFDDGGIYVCRATNLQGEAQCECRLE  
VR---

UPI000154D9A3\_R\_norvegi

MPEPGKRPVSAFTKKPRSVETAGSAAVFEAETERSGLKVQWQRDGS DIAANDKYGLAAEGKRH  
TLTVRDVGPDDQGSYAVIAGSSKVKFDLKVTEPEKAE--  
SAVAPTSMEAPETPKVVPALATQLEGNVSSPEGSVSVTQDSSQGAPDDPIGLFLMRPQDGEVT  
VGGSI VFSARVAGASLLKPPVVKWFKGKVVLDLSSKVGQHLQLHDSYDRASKVYLFELHITDAQA  
TSAGGYRCEVSTKDKFDSCNFNLTVHEAIGSGDLDLRSFRRTSLAGTGRRTSDSHEDAGTLDF  
SSLLKK-SSFR--  
RDSKLEAPAEEDVWEILRQAPPSEYERIAFQHGVTDLRGMLKRLKGMKHDEKKSTAFQKKLEPA  
YQVNKGHKIRLTVELADPDAEVKWLKNGQEIQMSG-  
RYIFESIGAKRTLTISQCSLADDAAYQCVVVGGEKCSSTELFVKEPPVLI TRSLEDQLVMVGQRVE  
FECEVSEEGAQVKWLKDGVELTREETFKYRFKKDGRKHHLI INEATLEDAGHYAVRTSGGQALA  
ELIVQEKKLEVYQSIADLAVGAKDQAVFKCEVSDENVRGVWLKNGKELVPDNRIKVVSHIGRVHKL  
TI DDVTPADEADYSFVPEGFACNLSAKLHFMEVKIDFVPRQEPKIHLDPCGSTPDTIVVVAG  
NKLRLDVPI SGDPAPTVIWQKTITQGKKASAGPPPAPEDAGADEEWVFDKLLCETEGRVRVE  
TTKDRSVFTVEGAKEKEDEGVYTVTVKNPVGEDQVNLTVKVIDVPDAPAAPKISNVGEDSCIVQW  
EPPAYDGGQPVLGYILERKKKSYRWMRLNFDLLRELSHEARRMIEGVAYEMRVYAVNAVMSR  
PSPASQPFMPIGPPGEPHTLTVEDVSDTTVSLKWRPPERVAGAGGLDGYSVEYQEGCSEWVTAL

QGLTERTSLLVKDLPTGARLLFRVRAHNVAGPGGPIITKEPVTVQEILQRPRQLPRHLRQTIQ  
KKVGEVNVLLIPFQGKPRPQVTWTKEGQPLAGEEVSIRNSPTDTILFIRAARHRSHTSGTYQVTVR  
IENMEDKATLVLQIVDKPSPPLDIRVVETWGFVVALEWKPPQDDGNTIEWGYTVQKADKKTMEW  
FTVLEHYRQTHCVVSELIIGNGYFRVFSHNMVGSDDRAAATKEPIFIPRPGITYEPPKYKALD  
FSEAPSFTQPLTNRSIIAGYNAILCCAVRGSPPKPKISWFKNGLDLGEDARFRMFCKQGVLTLEI  
RKPCPYDGGVYVCRATNLQGEAQCECRLEVRVPQ

070468\_Mus\_musculus\_Myos

MPEPGKKPVSAFNKKPRSAEVTAGSAAVFEAETERSGVMVRWQRDGS DITANDKYGLAAEGKRH  
TLTVRDASPDQGSYAVIAGSSKVKFDLKVTEPEKAE--SEV-----

APGAPPEVPAPATELEESVSSPEGSVSVTQDGSHQGAPDDPIGLFLMRPQDGEVTVGGSIVFSA  
RVAGASLLKPPVVKWFKGKWDLSKVGQHLQLHDSYDRASKVYLFELHITDAQTTSAGGYRCE  
VSTKDKFDSCNFNLTVHEAIGSGDLDLRSAFRRTSLAGAGRRTSDSHEDAGTPDFSSLLKKRDS  
FR--

RDSKLEAPAEEDVWEILRQAPPSEYERIAFQHGVEACHRPLKRLKGMKQDEKKSTAFQKKLEPA  
YQVNGGHKIRLTVELADPDAEVKWLKNGQEIQMSGSKYIFESVGAKRTLTISQCSLADDAAYQC  
VVGGEKCESTELFVKEPPVLI TRSLEDQLVMVGQRVEFECEVSEEGAQVKWLKDGVELTREETFK  
YRFKKDGRKHHLIINEATLEDAGHYAVRTSGGQSLAELIVQEKKLEVYQSIADLAVGAKDQAVF  
KCEVSDENVRGVWLKNGKELVDPNRIKVSHIGRVHKLTI DDVTPADEADYSFVPEGFACNLSAK  
LHFMEVKIDFVPRQEPPKIHLDPCGSPDTIVVVTGNKLRDLVPI SGDPAPT VVWQKTVTQGKK  
ASAGPHPDAPEDAGADEEWFVKLLCETEGRV RVETTKDRSVFTVEGAEKEDEGVYTVTVKNP  
VGEDQVNLTVKVIDVPDAPAAPKISNVGEDSCTVQWEPPAYDGGQPVLGYILERKKKKS YRWMR  
LNFDLLRELSHEARRMIEGVAYEMRVYAVNAVGM SRPSPASQPFMPIGPPGEPTHLAVEDVSDT  
TVSLKWRPPERVGAGGLDGY SVEYCQEGCSEWTPALQGLTERRSMLVKDLPTGARLLFRVRAHN  
VAGPGGPIVTKPEPVTVQEILQRPRQLPRHLRQTIQKKVGEVNVLLIPFQGKPRPQVTWTKEGQ  
PLAGEEVSIRNSPTDTILFIRAARRHRSHTSGTYQVTVRIENMEDKATLILQIVDKPSPPPQDIRIVE  
TWGFNVVALEWKPPQDDGNTIEWGYTVQKADKKTMEWFTVLEHYRRTHCVVSELIIGNGYFRV  
FSHNMVGSDDKAAATKEPVFI PRPGITYEPPKYKALDFSEAPSFTQPLANRSIIAGYNAILCCAV  
RGSPPKPKISWFKNGLDLGEDARFRMFCKQGVLTLEIRKPCPYDGGVYVCRATNLQGEAQCECR  
LEVRVPQ

UPI0000F2DAC3\_M\_domesti

-----  
-----

ASGDPIGLFVSRPQDGEVTVGDSITFSAQVAGASLLKPPVVKWFKGKWDLSGKVGKNLQLHDS  
YDRASKVYLFELHISEVQAAYAGGYRCEVSTKDKFDSCNFNLTVHEAIGPADL DLRSAFRRPSL  
PGGNRRTSDGHDDAGSLDFSSLLKKRDLFRGARDPKLEAPAEEDVWEILRTAPPSEYERIAFQH  
GVTDLRGMLKRLKGMKKDEKKSAAFLKLEPAYQVNGQKIRLVVEVADPDAEVKWLKNGQPIQ  
MSGSKYIFESAGNKRMLTISQCSLADDAAYQCMVGGDKCESTELFVKEPPVLI TRGLEDQMVTVG  
QRVEFECEVSEEGAPVKWLKDGVELTREETFKYRFKKDGRKHHLIINEATLED SGHYAIRTS GG  
QALAEIVQEKTLEVYQNIADLTVGARDQAVFKCEVSDENVKGVWLKNGRELVPDSRIKVSHIG  
RVHKLTI DDVTPADEADYSFVPEGFACNLSAKLHFMEVKIDFVPRQEPPKIHLDPCGRT PDTIV  
VVAGNKLRLDVPISGDPAPT VIWQKASQESK-----

TPDPATEVGDSSSEWVFEKLLCETEGRV RVETHKDRSIFTVEGAEKEDEGVYTVTVKNPVGEDQ  
VNITVKVIDVPDPPAAPKISNVGEDSCTVQWQPPAYDGGQPILGYILERKKKKS YRWMRLNFDL  
LRELSHEARRMIEGVVYEMRVYAVNAIGMSRSPSPASQPFMPIGPPSEPTHLGVEDISDSSVTLK  
WRPPERVGAGGLDGY SVEYCREGSSEWVSALQSLTERTSLLVKELPTGARLLFRVRAHNLGAPS  
APAITKEAITVQEILERPRRLRPRHLRQTVQRKVGEVNVLLIPFQGKPRPQVTWTKEGQPLAGN  
DVSIRNSPTDTILFIRTAHRAHSGTYQVAVQIENMEDTATLVLQIVDRPSPPPQEV RVVTETWGFN

VALEWKPPQDDGNTLWGYTVQKADKKTMEWFTVLEHYRRTHCVVSELIMGNYYFRVFSHNMV  
GASEKAATTKEPVFIPKIGLTYQPPTYKALDFSEAPSFTQPLVNRSVIAGYNAVLCSSVRGSPK  
PKISWFKNGLDLGEDARFRMFSKQGVLTLEIRKPCPFDDGGAYVCRATNAQGEAQCECRLEVR--  
-

A9JTS4\_Mybp3\_protein\_n\_ MPEPVKK--  
SAFTKKPKSEEVS VGGT VTF AAETDKPGLKVKWQRNNVDITANERFAIKSEGKQHS LTI SNATA  
EDEVVYAVIAGTSKVKFELKVKETEEAPAPAAPEASEAPAPPAPDSSAPPPTETAEGEAKPPES  
AEATAIQ--

PEPPKDEIGLFLERPKDAEITVGSNIKFTARIAGANLIKKPVVKWFKGKWM DLTSKVGKHLQLH  
EIYDRNTKIYTFEIQI IQAKTTYAGGYRCEVSSKDKFDSCNFNLAVHEVSTSGEVDIRAAFRRT  
-----DGAE EAGELDFSALLKKRD-----

EPKQGAEPD VDVWDILKKAPPSEYEKIAFQYGITDLRGLLKR LKKMKKEEKKSEAF LKKMDPAY  
QIDKGQKMKLVVEVANPDAEVKWLKNGQEIRVSGSKYIFESIGNKRILTINNC SLADDAAYQCV  
IGEEKCFTEL FVREPPVQILHSLEDQMVMVGERVEFECEVSEEGAQVKWEKDGVELTREETF KY  
RFKKDGK KHF L I NETTLEDGGNYKVK TNGGESVAELMVQEKQLEVLQDVADLTVKAKEQAVFK  
CEVSD ETVTGIWV KNGKEV I PNNRIKI THIGRVHKL TIDDVVPQDEGDYSFIPNGFAFSLSAKL  
HFMEVKIDFVPRQEPKIKLDCMSQCADTIIVVAGNKLRLDVPISGDPAPT VVWMKGDK-----  
-----

LISEVDGRVHVETHADHCVFII EGAEKSDEGAYTVLVKNEAGEDKANINVKVIEVDPDPESP KI  
SNIGEDFCTVQWDP PKYDGGQPV LGYILERKKKKS YRWMRLNYDLVKELTYESKRMIEGVVYEM  
RIYAVNSIGMSLPSQPSQPFMPIAPTSEPTQLVVEDVSDTSISLKW RPPERIGAGGLDGYTVEY  
CKEGSTEWVPALQGLTERN SVMIRDLPTGERLTFRVRAINLAGPSEPCTMKEPVTIREIMQRPK  
IWLPRYL RQKLIK KVGETVNIVIPFQ GKPRPVV T W LKDGQPVDPKQV G I R N S E A D T I L F I R K A E  
RDHSGEYK VQIQI ENCEDSATI C I Q I V D K P S A S Q K L K I V E I W G F N V A L E W A P P Q D D G N T E I T G Y  
TVQKADKKTMEWFTVFEHYRRTHCVVSDLIMGNEYFRVFS ENMCGLSEKPC TTKNSAYIQKTG  
TAYKPPTYKDHEFDEAPKFTHPLNDRSVVAGYNATLSCAVRGI PKPKITWYKNKMDLSMEARYR  
SFSKQGVLTLEVRKPSPFDDGGLYTCKAVNEHGVAETE CRLEVRVPQ

UPI0000ECB979\_G\_gallus\_ -----  
-----  
-----

PEEPVDP IGLFVTRPQDGEVTVGGNITFTAKVAGESLLKKPSVKWFKGKWM DLASKVGKHLQLH  
DNYDRNNKVYTFEMEIEANMTFAGGYRCEVSTKDKFDSSNFNLIVNEAPVSGEMDIRAAFRRT  
SLAGGGRMSEGLEESGELNFSALLKK-

SSFLANRDGKSDSQPDVDVWEILRKAPPSEYEKIAFQYGITDLRGM LKRLKR IKKEEKKSTAF L  
KKLDPAYQVDKGQKIKLMVEVANPDADV KWLKNGQEIQVSG-  
RYIFEAIGNKRILTINHCSLADDAAYECVVAEEKSFTELFVKEPPILITHPLEDQMVMVGERVE  
FECEVSEEGATVKWEKDGVELTREETF KYRFKKDGKKQYLI INESTKEDSGHYTVKTNGGVSVA  
ELIVQEKKLEVYQSIADLTVKARDQAVFKCEVSDENVKGIWLKNGKEVVPDERIKISHIGRIHK  
LTIEDVTPGDEADYSFIPQGFAYNLSAKLQFLEVKIDFVPREEPPKIHLDCLGQSPDTIVVVAG  
NKLRLDVPISGDPTPTVIWQKVNKKGELVHQSNE-

DSLTPSENSSDLSTDSKLLFESEGRV RVEKHEDHCVFII EGAEKEDEGVYRVIVKNPVGEDKAD  
ITVKVIDVDPPEAPKISNIGEDYCTVQWQPPTYDGGQPV LGYILERKKKKS YRWMRLNFDLLK  
ELTYEAKRMIEGVVYEMRIYAVNSIGMSRSPASQPFMPIAPPSEPTHTFTVEDVSDTTVALKWR  
PPERIGAGGLDGYIVEYCKDGS AEWTPALPGLTERTSALIKDLVTGDKLYFRVKA INLAGESGA  
AI I KE P V T V Q E I M Q R P K I W L P R H L R Q T L V K K V G E T I N I M I P F Q G K P R P K I S W M K D G Q T L D S K D V  
GIRNSSTD TILFIRKAELHHS GAYEVTLQIENMTDTVAITIQI IDKPGPPQNIKLADVWGFNVA  
LEWTPPQDDGNAQILGYTVQKADKKTMEWYTVYDHYRRTNCVSDLIMGNEYFRVFS ENLCGL

SETAATTKNPAYIQKTGTTYKPPSYKEHDFSEPPKFTHPLVNRSVIAGYNTTLSCAVRGI PKPK  
IFWYKNKVDLSGDAKYRMFSKQGVLTLEIRKPTPLDGGFYTCKAVNERGEAEIECRLDVRVPQ  
Q90688\_G\_gallus\_Myosin\_ -----

PEEPVDPIGLFVTRPQDGEVTVGGNITFTAKVAGESLLKKPSVKWFKGKWM DLASKV GKHLQLH  
DNYDRNNKVYTFEMEIEANMTFAGGYRCEVSTKDKFDSSNFNLIVNEAPVSGEMDIRAAFRRT  
SLAGGRRMSEGLEESGELNFSALLKKRDSFLANRDGKSDSQPDVDVWEILRKAPPSEYEKIAF  
QYGITDLRGM LKRLKRIKKEKKSTAF LKKLDPAYQVDKGQKIKLMVEVANPDADVKWLKNGQE  
IQVSGSKYIFEAGNKRILTINHCSLADDAAYECVVAEKSFTL FVKEPPILITHPLEDQMV  
MVGERVEFECEVSEEGATVKWEKDGVELTREETFKYRFKKGKQYLI INESTKEDSGHYTVKTN  
GGVSV AELIVQEKKLEVYQSIADLTVKARDQAVFKCEVSDENVKGIWLKNGKEVVPDERIKISH  
IGRIHKLTIEDVTPGDEADYSFIPQGFAYNLSAKLQFLEVKIDFVPREEPPKIHLDCLGQSPDT  
IVV VAGNKLRLDVPISGDPTPTVIWQKVNKKGELVHQSN-

DSLTPSENSSDLSTDSKLLFESEGRVVRVEKHEDHCVFIEGAEKEDEGEVYRVIVKNPVGEDKAD  
ITVKVIDVDPPEAPKISNIGEDYCTVQWQPPTYDGGQPVLGYILERKKKSYRWMRLNFDLLK  
ELTYEAKRMIEGVVYEMRIYAVNSIGMSRSPASQPFMPIAPPSEPTHTVEDVSDTTVALKWR  
PPERIGAGGLDGYIVEYCKDGS AEWTPALPGLTERTSALIKDLVTGDKLYFRVKA INLAGESGA  
AI I KEPVTVQEIMQRPKICVPRHLRQTLVKKVGETINIMIPFQ GKPRPKISWMKDGQTLDSKDV  
GIRNSSTDTILFIRKAELHHS GAYEVTLQIENMTDTVAITIQIIDKPGPPQNIKLADVWGFNVA  
LEWTPPQDDGNAQILGYTVQKADKKTMEWYTVYDHYRRTNCVVS D LIMGNEYFFRVFSENLCGL  
SETAATTKNPAYIQKTGTTYKPPSYKEHDFSEPPKFTHPLVNRSVIAGYNTTLSCAVRGI PKPK  
IFWYKNKVDLSGDAKYRMFSKQGVLTLEIRKPTPLDGGFYTCKAVNERGEAEIECRLDVRVPQ

Q90688\_2\_G\_gallus\_Isofo -----

PEEPVDPIGLFVTRPQDGEVTVGGNITFTAKVAGESLLKKPSVKWFKGKWM DLASKV GKHLQLH  
DNYDRNNKVYTFEMEIEANMTFAGGYRCEVSTKDKFDSSNFNLIVNEAPVSGEMDIRAAFRRT  
-----

EGLEESGELNFSALLKKRDSFLANRDGKSDSQPDVDVWEILRKAPPSEYEKIAFQY GITDLRGM  
LKRLKRIKKEKKSTAF LKKLDPAYQVDKGQKIKLMVEVANPDADVKWLKNGQEIQVSGSKYIF  
EAIGNKRILTINHCSLADDAAYECVVAEKSFTL FVKEPPILITHPLEDQMV MVGERVEFECE  
VSEEGATVKWEKDGVELTREETFKYRFKKGKQYLI INESTKEDSGHYTVKTN GGVSV AELIV  
QEKKLEVYQSIADLTVKARDQAVFKCEVSDENVKGIWLKNGKEVVPDERIKISHIGRIHKLTI  
EDVTPGDEADYSFIPQGFAYNLSAKLQFLEVKIDFVPREEPPKIHLDCLGQSPDTIVV VAGNKL  
RLDVPISGDPTPTVIWQKVNKKGELVHQSN-

DSLTPSENSSDLSTDSKLLFESEGRVVRVEKHEDHCVFIEGAEKEDEGEVYRVIVKNPVGEDKAD  
ITVKVIDVDPPEAPKISNIGEDYCTVQWQPPTYDGGQPVLGYILERKKKSYRWMRLNFDLLK  
ELTYEAKRMIEGVVYEMRIYAVNSIGMSRSPASQPFMPIAPPSEPTHTVEDVSDTTVALKWR  
PPERIGAGGLDGYIVEYCKDGS AEWTPALPGLTERTSALIKDLVTGDKLYFRVKA INLAGESGA  
AI I KEPVTVQEIMQRPKICVPRHLRQTLVKKVGETINIMIPFQ GKPRPKISWMKDGQTLDSKDV  
GIRNSSTDTILFIRKAELHHS GAYEVTLQIENMTDTVAITIQIIDKPGPPQNIKLADVWGFNVA  
LEWTPPQDDGNAQILGYTVQKADKKTMEWYTVYDHYRRTNCVVS D LIMGNEYFFRVFSENLCGL  
SETAATTKNPAYIQKTGTTYKPPSYKEHDFSEPPKFTHPLVNRSVIAGYNTTLSCAVRGI PKPK  
IFWYKNKVDLSGDAKYRMFSKQGVLTLEIRKPTPLDGGFYTCKAVNERGEAEIECRLDVRVPQ

UPI00015A7ACA\_Danio\_eri -----

VSAFSSKPKSQTAIEIGARVIFEAE TEKPGVKVKWQRESKDILPSHKYTI SAEDNKHSLTINNI I

QEDAVGYAVIAGMSKVKFELKIKEKGVKAAVEHKPEESKPEESKPEPKEPPPAPTENSAPEST  
GP-----

PSDGVAPPEGLFTEKPHSGEVNNGENIIFIARVCGESLLKKPTVKWFKGKWMDLASKSGKHLQLK  
EHYDRNTKVYTFEMHIIAAKANFAGAYRCEVSSRDKFDSCNFDLIVHEARTTEGFDIRTAFRRT  
STS-----IDAGDDSGELDFSAALLKKRLTY-

SSVAVHVSTEPDQVVDVWDILQKAPPSEYEKIAFQYGITDLRGLMLKRLKKMKKEEKSSAAFLKKLD  
PAYQVEKGHKIKLEIEVANPDAEVKWLKNGQEIHPTG-

RYIFESVGNKRFLTINNCSLSDDAAYMCVVGDEKTVTELFVKEPPVLIVRNLEDQMAMKGDVE  
FECEVSEEGAQVKWEKDGVELTRDESFKYRFKKDGCKHVLIINDVTKEDCGHYRVKTNGGQSLA  
ELMVQEKQLEVYQSIADLTVKAKDQAVFKCEVSDENVKGIWYKNGVEVKPDARTLITHIGRIHK  
LTIDDVKPEDEGDYTFVPEGFAFNLSAKLNFLEVKIDFVPRQDPPKIHLCMGRTAETILVVAG  
NKLRLDVPITGDPAPTVIWTKGEKVGVRPVS RGVGSKDPPFTDKVFID--

TKILCDSGRVHVESTKGHCIFTIEGAERQDEGVYSVIVRNPAGEDTADINVKVVDVDPPEAP  
RILSVGEDSCVQWDAPRFDGGQPVIGYVLERKKKSYRWMRLNFDPYKETTFEAKKMIIEGVPY  
EMRVYAVNAIGMSRPSAASQPFVVPAPTSEPIGLCVDDISDTTISLKWRTPERIGSAELEGYGV  
EYCKEGSDEWIPAFSGLTERTSVIIRDLPTEKMQFRVRAYNMAGPSAPATLQQAVTIREIMQR  
PKIWLPRNLRQTLIKKVGETINLVIPFQGKPRPQVSWTKNDEPLDPKSVSIRNSD TDTILFIRR  
SERKDSGKYDVQVQIENVEDKASVNIQIVDVPGPPQNLKVM DVWGFNVALEWKPPKDNGNCDIT  
GYNIQKADKKTMEWYTVFEQYRRTNCVVS DLIMGNEYVFRVYAANMVGLSPEPCLSKDSAYIQK  
TGIVYKPPSYKD HDFS EAPKFTHPLKSRSVIAGYNATLSCSVRGI PKPKITWYKNKMDITNEAK  
YRMFSNQGVLTLEIRKPCPFDDGGVYMCKAVNDSGEDLVECKLEVR---

UPI0000ECB97A\_g\_gallus\_

PEEPVDPIGLFVTRPQDGEVTVGGNITFTAKVAGESLLKKPSVKWFKGKWMDLASKVGKHLQLH  
DNYDRNNKVYTFEMEIIEANMTFAGGYRCEVSTKDKFDSSNFNLI VNEAPVSGEMDIRAAFRT  
SLAGGGRMSEGLEESGELNFSALLKKSSSFLANRDGKSDSQPDVDVWEILRKAPPSEYEKIAF  
QYGITDLRGLMLKRLKRIKKEKKSTAFLLKLDPAYQVDKGQIKLMVEVANPDADV KWLKNGQE  
IQVSGRTYIFEAI GNKRILTINHCSLADDAAYECVVAEEKSFTTELFVKEPPILITHPLEDQMVM  
VGERVEFECEVSEEGATVKWEKDGVELTREETFKYRFKKDGKKQYLI INESTKEDSGHYTVKTN  
GGVSVAELIVQEKKLEVYQSIADLTVKARDQAVFKCEVSDENVKGIWLKNGKEVVPDERIKISH  
IGRIHKLTIEDVTPGDEADYSFIPQGFAYNLSAKLQFLEVKIDFVPREEPPKIHLDCLGQSPDT  
IVVVAGNKLRLDVPISGDPTPTVIWQKVNKKGELVHQSN-

DSLTPSENSSDLSTDSKLLFESEGRVVRVEKHEDHCVFIEGAEKEDEGVYRVIVKNPVGEDKAD  
ITVKVIDVDPPEAPKISNIGEDYCTVQWQPPTYDGGQPVLYILERKKKSYRWMRLNFDLLK  
ELTYEAKRMIEGVVYEMRIYAVNSIGMSRPSPASQPFMPIAPPSEPTHTVEDVSDTTVALKWR  
PPERIGAGGLDGYIVEYCKDGS AEWTPALPGLTERTSALIKDLVTGDKLYFRVKAINLAGESGA  
AIIKEPVTVQEI MQRPKIWLPRHLRQTLVKKVGETINIMIPFQGKPRPKISWMKDGQTLDSKDV  
GIRNSSDTILFIRKAELHHS GAYEVTLQIENMTDTVAITIQIIDKPGPPQNIKLADVWGFNVA  
LEWTPPQDDGNAQILGYTVQKADKKTMEWYTVYDHYRRTNCVVS DLIMGNEYFFRVFSENLCGL  
SETAATTKNPAYIQKTGTTYKPPSYKEHDFS EPPKFTHPLVNRSVIAGYNTT LSCAVRGI PKPK  
IFWYKNKVDLSGDAKYRMFS-----

Q90X86\_X\_laevis\_Cardiac

PEPPKDEIGLFLERPQDGEITVGTNIKFTARIAGANLIKPVVKWFKGKWMDLTSKVGKHLQLH  
ESYDRNTKIYTFEIQIIGAKTTYAGGYRCEVSSKDKFDSCNFNLAVHEAASSGEVDIRAAFRT

SLVGAARRSDGTEEAGELDFSALLKKRDSFLVNREPKQGTEPDVDVWEILKKAPPSEYEKIAF  
QYGITDLRGLLKRLLKMKKKEKKSEAFLLKMDPAYQIDKGQKMKLVVEVANPDAEVKWLKNGQE  
IRVSGSKYIFESIGNKRILTINNC SLADDAAYTCVIGEEKCFTELFVREPPIQILHPLEDQMVM  
VGERVEFMCEVSEEGAQVKWEKDGVELTREETFYRFRKDKGKKHYLI INETTVEDGGHYKVKTN  
GGDSLAEMLVQEKQLEVLQDVADLTVRAKEQAVFKCEVSDETVTGIWVKNNGKEVIANNRIKITH  
IGRVHKLTI DDVVPQDEGDYSFIPNGFAFSLSAKLHFMEVKIDFVPRQEPPKIKLDCMSQCADT  
IIVVAGNKLRLDVPISGDPAPT VVMMKGDVKVIEQIKVRTE-----

TESQHDLYRDVDLI SEVDGRVHVETHPDHCVF TIEGAEKSDGAYTVVVKNEAGEDKANINVKV  
IEVDPPEAPRISNIGEDFCTVQWDPPKYDGGQPILGYILERKKKSYRWMRLNYDLVQELTYE  
SKRMIEGVVYEMRIYAVNSIGMSIPSQHSQPFMPIAPTSEPTMLVDDVSDTSISLKWRPPERI  
GAGGLDGYTVEYCKEGSTEWVPALLGLTERTSVMIRDLP TGERLAFRVRAINLAGPSEPCTMKE  
PVTIREIMQRPKIWLPRYLRQKLIKVKGETVNIVIPFQ GKPRPVVTWLKDGQPVDPKQIGIRNS  
EADSILFIRKAERDHSGEYKVQIQIENCEDSATIHIQIVDKPSAPQNLKLV EIWGFNVALEWVP  
PKDDGNT EITGYTVQKADKKTMEWFTVFEHYRRTHCVVSDLIMGNEYFFRVFSENMCGLSENPC  
TSKNSAYIQKTGTAYKPPSYKDHEFEEAPKFTHPLNDRS VIAGYNATLSCALRGIPKPKITWYK  
NKMDLSMEARYRSFSKQGVLTLELRKPSPF DGGVYTCKAVNEHGVAETE CRLEVRVPQ

Q498L6\_X\_\_laevis\_Putativ

PEPPKDEIGLFLERPQDGEITVGTNIKFTARIAGANLIKPPVVKWFKGKWMDLT SKVGKHLQLH  
ESYDRNTKIYTFEIQIIGAKTTYAGGYRCEVSSKDKFDSCNFNLAVHEAASSGEVDIRAAFRRT  
SLVGAARRSDGTEEAGELDFSALLKKRDSFLVNREPKQGTEPDVDVWEILKKAPPSEYEKIAF  
QYGITDLRGLLKRLLKMKKKEKKSEAFLLKMDPAYQIDKGQKMKLVVEVANPDAEVKWLKNGQE  
IRVSGSKYIFESIGNKRILTINNC SLADDAAYTCVIGEEKCFTELFVREPPIQILHPLEDQMVM  
VGERVEFMCEVSEEGAQVKWEKDGVELTREETFYRFRKDKGKKHYLI INETTVEDGGHYKVKTN  
GGDSLAEMLVQEKQLEVLQDVADLTVRAKEQAVFKCEVSDETVTGIWVKNNGKEVIANNRIKITH  
IGRVHKLTI DDVVPQDEGDYSFIPNGFAFSLSAKLHFMEVKIDFVPRQEPPKIKLDCMSQCADT  
IIVVAGNKLRLDVPISGDPAPT VVMMKGDVKVIEQIKVRTE-----

TESQHDLYRDVDLI SEVDGRVHVETHPDHCVF TIEGAEKSDGAYTVVVKNEAGEDKANINVKV  
IEVDPPEAPRISNIGEDFCTVQWDPPKYDGGQPILGYILERKKKSYRWMRLNYDLVKELT YE  
SKRMIEGVVYEMRIYAVNSIGMSIPSQHSQPFMPIAPTSEPTMLVDDVSDTSISLKWRPPERI  
GAGGLDGYTVEYCKEGSTEWVPALLGLTERTSVMIRDLP TGERLAFRVRAINLAGPSEPCTMKE  
PVTIREIMQRPKIWLPRYLRQKLIKVKGETVNIVIPFQ GKPRPVVTWLKDGQPVDPKQIGIRNS  
EADSILFIRKAERDHSGEYKVQIQIENCEDSATIHIQIVDKPSAPQNLKLV EIWGFNVALEWVP  
PKDDGNT EITGYTVQKADKKTMEWFTVFEHYRRTHCVVSDLIMGNEYFFRVFSENMCGLSENPC  
TSKNSAYIQKTGTAYKPPSYKDHEFEEAPKFTHPLNDRS VIAGYNATLSCALRGIPKPKITWYK  
NKMDLSMEARYRSFSKQGVLTLELRKPSPF DGGVYTCKAVNEHGVAETE CRLEVRVPQ

B7ZS41\_X\_\_laevis\_Putativ

PEPPKDEIGLFLERPQDGEITVGTNIKFTARIAGANLIKPPVVKWFKGKWMDLT SKVGKHLQLH  
ESYDRNTKIYTFEIQIIGAKTTYAGGYRCEVSSKDKFDSCNFNLAVHEAASSGEVDIRAAFRRT  
-----DGTEEAGELDFSALLKKRD-----

EPKQGTEPDVDVWEILKKAPPSEYEKIAFQYGITDLRGLLKRLLKMKKKEKKSEAFLLKMDPAY  
QIDKGQKMKLVVEVANPDAEVKWLKNGQEIRVSGSKYIFESIGNKRILTINNC SLADDAAYTCV  
IGEEKCFTELFVREPPIQILHPLEDQMVMVGERVEFMCEVSEEGAQVKWEKDGVELTREETFY  
RFRKDKGKKHYLI INETTVEDGGHYKVKTN GGDSLAEMLVQEKQLEVLQDVADLTVRAKEQAVFK

CEVSDTVTGIWVKNKEVIANNRIKITHIGRVHKLTI DDVVPQDEGDYSFI PNGFAFSLSAKL  
HFMEVKIDFVPRQEPKIKLDCMSQCADTIIVVAGNKLRLDVPISGDPAPTIVVMKGDKVIEQI  
KVRTE-----

TESQHDLYRDVDLISEVDGRVHVETHPDHCVF TIEGAEKSDGAYTVVVKNEAGEDKANINVKV  
IEVPDPPEAPRISNIGEDFCTVQWDPKYGQPI LGYILERKKKSYRWMRLNYDLVQELTYE  
SKRMIEGVVYEMRIYAVNSIGMSIPSQHSQPFMPIAPTSEPTMLVVDDVSDTSISLKW RPPERI  
GAGGLDGYTVEYCKEGSTEWVPALLGLTERTSVMIRDLP TGERLAFRVRAINLAGPSEPCTMKE  
PVTIREIMQRPKIWLPRYLRQKLIK KVG ETVNIVIPFQ GKPRPVVTWLKDGQPVDPKQIGIRNS  
EADSILFIRKAERDHSGEYKVQIQIENCEDSATIHIQIVDKPSAPQNLK LVEIWGFNVALEWVP  
PKDDGNTEITGYTVQKADKKTMEWFTVFEHYRRTHCVVSDLIMGNEYFFRVFSENMCGLSENPC  
TSKNSAYIQKTGTAYKPPSYKDHEFE EAPKFTHPLNDRSVIAGYNATLSCALRGI PKPKITWYK  
NKMDLSMEARYRSFSKQGVLTLELRKPSPF DGGVYTCKAVNEHGVAETE CRLEVRVPQ

Q4SI34\_T\_nigroviridis\_C

MPETLKKAVSAFTKKPKTLEAAAGSSVVF EAETEKPDAKVKWQCNAKDIANGNKY TIAADGSKH  
SLSIKAVTHQDANIYAVISGGSKVKFELKVVS-----

-----KPEAPADGP-

EEPGVQPEQAPAASTQNQSVAAQONITFVAKVNEESLLKKPSVKWFKGKWM DLASKSGKHLQLK  
ESYDRNTKVYTFEMQILAAKANFAGAYRCEVSSKDKFDSCNF TLTVHDVCVEEGLDIRAAFRR T  
-----SDGKEDSGELDFSTLLKKR-----

AVHVSSEPEVDVWEILSKAPSSEYEKIAFQHGITDLR GMLKRLKMKKKEEKKSAAFLRKLDPAY  
QVTKGHKIRLAVEVANADADV KWLKNGQEFHPTG-

RYIFESVGNMRYLTINNC SLADDAAYCCVVGEEKSTSE LFVKEPPVLIVKNLEDQMVMKGD RVE  
LECEVSEEGANVKWEKDGVELTRDESFKYRFFKKGCKHIL IINDATKEDCGHYKVKTNGGESMA  
ELLVQEKELIYQSIADLTVKAKDQALFKCEVSDENVRGTWYKNGAEVKPDARINITHIGRIHK  
LTIDDVKPGDEGDYTFVPGYAYNLSAKLNFLEVKIDYVPRQDPPKIH LDCMGRTAETIVVVAG  
NKLRLDVPITGDPAPTIVITKGEK-----

VVTEGDGRVHVESTKGHCIFTIEGAERQDEGIYSVVVRNAAGEDTADINVKVVDVDPDPQEVKI  
LSVGEESC VVQWDP PAFDGGQPIIGYVLERKKKSYRWMRLNFD PYPETTYEAKRMIEGVAYEM  
RVYAVNSIGMSRHSQASQPFVVPAPTSEPVGLCVDDISDTSIVLKW RPPERMGSV DLEGYGVEY  
CKEGTDEWIPAAQGLTERTSLIIRNLTTGDRLQFRV RAYNMAGPSPAATLAQPITIREIMQRPK  
ILLPRNLRQTLIRRVGDTVNLVIPFQ GKPRPKVTWSKNGEPLSSTLASIRNSEGDTILFIRKTE  
KTHSGKYDLQVQIENVEDTASVTLQVVDLPGPPEVLKIVDVWGFNVALEWKPPKDDGNCEITGY  
TVQKADKKTMEWFTVYDQYRRTHCIVSDLIMGNEYVFRV FANNLVGPSPEPCG TKDSAYIQKTG  
VVYKPPTHKEHDLSEAPKFTRPLVSRSVIAGYTATLSCSVRGVPKPKVTWYKNKMDLSNEAKYR  
MLSNHGVLTLEIRKPCPF DGGVYTCKAVNDSGEDTVECKLEVR---

UPI00015A7ACB\_Danio\_eri

-----  
-----

PDTRQDLTGLFTEKPHSGEVNNGENIIFIARVCGESLLKKPTVKWFKGKWM DLASKSGKHLQLK  
EHYDRNTKVYTFEMHIIAAKANFAGAYRCEVSSRDKFDSCNF DLIVHEARTTEGFDIRTAFRR T  
KFAFCGPFHSDAGDDSGELDFSALLKKRDIHSTQIAVHVST EPDVDVWDILQKAPPSEYEKIAF  
QYGITDLR GMLKRLKMKKKEEKKSAAFLK KLDPAYQVEKGHKIKLEIEVANPDAEVKWLKNGQE  
IHPTGHRYIFESVGNKRFLTINNC SLSDDAAYMCVVGDEKTVTELFVKEPPVLIVRNLEDQMAM  
KGDRVEFECEVSEEGAQVKWEKDGVELTRDESFKYRFFKKGCKHVLIINDVTKEDCGHYRVKTN  
GGQSLAELMVQEKQLEVYQSIADLTVKAKDQAVFKCEVSDENVKGIWYKNGVEVKPDARTLITH  
IGRIHKLTI DDV KPEDEGDYTFVPEGFAFNLSAKLNFLEVKIDFVPRQDPPKIH LDCMGRTAET  
ILV VAGNKLRLDVPITGDPAPTIVITKGEKVGKHI CSNI---



DFLLFYHVVDGLIQVLTSDGRVHVESTKGHCIFTIEGAERQDEGVYSVIVRNPAGEDTADIN  
VKVVDVDPPEAPRILSVGEDSCVVQWDAPRFDGGQPVIGYVLERKKKKSyrWmRLNFDpyket  
TFEAKKmieGvPYEMrvYAVNAIGMSRPSAASQPFVVPVAPTSEPIGLCVDDISDTTISLKWRTp  
ERIGSAELEGYgVEYCKEGSDEWIPAFSGLTERTSVIIRDLPtGekMQFRVRAYNMAGPSAPAT  
LQQAVTIREIMQRPKIWLPRNLRQTLIKKVGETINLVIPFQgKPRPQVSWTKNDEPLDPKsvSI  
RNSDTDTILFIRRSErkDSGKYDVQVQIENVEDKASVNIQIVDVPgPPQNLKVMdVWGFNVale  
WKPPKdNGNCDITGyNIQKADKKTMEWYTVFEQYRRtNCVVSdLIMGNEYVFRVYAANMVGLSP  
EPCLSKDSAYIQKTGIVYKPPSYKDhDFSEAPKfTHPLKSRsvIAGYNATLSCSVRGIpkPKIT  
WYKNKMDITNEAKYRMfSNQGVLTLEIRKPCPFdGGVYMCKAVNDSGEDLVECKLEVR---

UPI0001722DB9\_Danio\_reri

PDTRQDLTGLFTEKPHSGEVNNGENIIFIARVCGESLLKKPTVKWFKGKwMDLASKSGKHLQLK  
EHYDRNTKVYTFEMHIIAAKANFAGAYRCEVSSRDkFDSCNFDLIVHEARTTEGFDIRTAFRRt  
S-----

DAGDDSGELDFsALLKKRDSFVGQRAVHVSTEPDvdVWDILQKAPPSEYEKIAFQYGITDLRGM  
LKRLKKMKKEEKKSAAFLKKLDPAYQVEKGHKIKLEIEVANPDAEVKWLKNGQEIhPTGSKYIF  
ESVGNKRFLtINNCSLSDDAAYMCVVGDEKTVTELFVKEPPVLIVRNLEDQmAMKGDReFECE  
VSEEGAQVKWEKdGVELTRDESfKYRFKKDGCKHVLIINDVTkEDCGHYRVKtNGGQSLAELMV  
QEKQLEvyQSIADLTVKAKDQAVFKCEVSDENVKGIWYKNGVEVKPDARTLITHIGRIHKLTID  
DVKPEDEGDYTFVPEGFAFNLSAKLNFLEVKIDFVPRQDPPKIHLDCMGRtAETILVvAGNKLr  
LDVPITGDPAPTVIWTKGek-----

VLTSDGRVHVESTKGHCIFTIEGAERQDEGVYSVIVRNPAGEDTADINVKVVDVDPPEAPRI  
LSVGEDSCVVQWDAPRFDGGQPVIGYVLERKKKKSyrWmRLNFDpyketTFEAKKmieGvPYEM  
rvYAVNAIGMSRPSAASQPFVVPVAPTSEPIGLCVDDISDTTISLKWRTPERIGSAELEGYgVEY  
CKEGSDEWIPAFSGLTERTSVIIRDLPtGekMQFRVRAYNMAGPSAPATLQQAVTIREIMQRPK  
IWLPRNLRQTLIKKVGETINLVIPFQgKPRPQVSWTKNDEPLDPKsvSIRNSDTDTILFIRRSE  
RKDSGKYDVQVQIENVEDKASVNIQIVDVPgPPQNLKVMdVWGFNValeWKPPKdNGNCDITGy  
NIQKADKKTMEWYTVFEQYRRtNCVVSdLIMGNEYVFRVYAANMVGLSPEPCLSKDSAYIQKTG  
IVYKPPSYKDhDFSEAPKfTHPLKSRsvIAGYNATLSCSVRGIpkPKITWYKNKMDITNEAKYR  
MfSNQGVLTLEIRKPCPFdGGVYMCKAVNDSGEDLVECKLEVRlpQ

UPI00015A7ACC\_Danio\_reri

LGENIIFIARVCGESLLKKPTVKWFKGKwMDLASKSGKHLQLKEHYDRNTKVYTFEMHIIAAKA  
NFAGAYRCEVSSRDkFDSCNFDLIVHEARTTEGFDIRTAFRRtVFI-----

SDAGDDSGELDFsALLKKRDIHSTQIAVHVSTEPDvdVWDILQKAPPSEYEKIAFQYGITDLRGM  
MLKRLKKMKKEEKKSAAFLKKLDPAYQVEKGHKIKLEIEVANPDAEVKWLKNGQEIhPTG-  
RYIFESVGNKRFLtINNCSLSDDAAYMCVVGDEKTVTELFVKEPPVLIVRNLEDQmAMKGDRe  
FECEVSEEGAQVKWEKdGVELTRDESfKYRFKKDGCKHVLIINDVTkEDCGHYRVKtNGGQSLA  
ELMVQEKQLEvyQSIADLTVKAKDQAVFKCEVSDENVKGIWYKNGVEVKPDARTLITHIGRIHK  
LTIDDVKPEDEGDYTFVPEGFAFNLSAKLNFLEVKIDFVPRQDPPKIHLDCMGRtAETILVvAG  
NKLRLDVPITGDPAPTVIWTKGekVGVKHCsNI-----

DHVVDGLIQVLTSDGRVHVESTKGHCIFTIEGAERQDEGVYSVIVRNPAGEDTADINVKVVD  
VPDPPEAPRILSVGEDSCVVQWDAPRFDGGQPVIGYVLERKKKKSyrWmRLNFDpyketTFEAK  
KmieGvPYEMrvYAVNAIGMSRPSAASQPFVVPVAPTSEPIGLCVDDISDTTISLKWRTPERIGS

AELEGYGVVEYCKEGSDEWIPAFSGLTERTSVIIRDLP TGEKMQFRV RAYNMAGPSAPATLQQAV  
TIREIMQRPKIWLPRNLRQTLIKKVG E TINLVIPFQ GKPRPQVSWTKNDEPLDPKSVSIRNSDT  
DTILFIRRSERKDSGKYDVQVQIENVEDKASVNIQIVDVP GPPQNLKVM DVWGFNVALEWKPPK  
DNGNCDITGYNIQKADKKTMEWYTVFEQYRRTNCVVS D LIMGNEYVFRVYAANMVGLSPEPCLS  
KDSAYIQKTGIVYKPPSYKDHFSEAPKFTHPLKSR SVIAGYNATLSCSVRGIPKPKITWYKNK  
MDITNEAKYRMFSNQGVLTLEIRKPCPF DGGVYMCKAVNDSGEDLVECKLEVR---

UPI00006A19A0\_Myosin\_bin

QIYTFEIQIIQAKTTYAGGYRCEVSSKDKFDSCNFNLAVHDASTSGEVDIRAAFRRTSLVGAAK  
RRSDGAE EAGELDFSALLKKSSSFLVNREPKQGAEPD VDVWDILKKAPPSEYEKIAFQYGITDL  
RGLLRLKMKKKEEKKSEAF LKKMDPAYQIDKGQKMKLVVEVANPDAEVKWLKNGQEIRVSG-  
RYIFESIGNKRILTINNCSLADDAAYQCVIGEEKCFTELFVREPPVQILHSL EDQMVMVGERVE  
FECEVSEEGAQVKWEKDGVELTREETFKYRFFKKGK KHFLLIINETTLEDGGNYKVKTNNGGESVA  
ELMVQEKQLEVLQDVADLTVKAKEQAVFKCEVSD ETVTGIWVKNGKEVIPNNRIKITHIGRVHK  
LTIDDVVPQDEGDYSFIPNGFAFSLSAKLHFMEVKIDFVPRQEPPKIKLDCMSQCADTIIVVAG  
NKLRLDVPIISGDPAPT VVMMKGDKVIEQTPVRTE-----

SEAHHDLYRDVDLISEVDGRVHVETHADHCVF IIEGAEK SDEGAYTVLVKNEAGEDKANINVKV  
IEVPDPPEPKISNIGEDFCTVQWDPPKYDGGQPVLGYIL ERKKKSYRWMRLNYDLVKELTYE  
SKRMIEGVVYEMRIYAVNSIGMSLPSQPSQPFMPIAPT SEPTQLVVEDVSDT S ISLKWRPPERI  
GAGGLDGYTVEYCKEGSTE WVPALQGLTERN SVMIRDLP TGERLTFRVRAINLAGPSEPCTMKE  
PVTIREIMQRPKIWLPRYLRQKLIK KVG ETVNIVIPFQ GKPRPVVTWLKDGQPVDPKQVGIRNS  
EADTILFIRKAERDHSGEYKVQIQIENCEDSATI CIQIVDKPSAPQK LKIVEIWGFNVALEWAP  
PQDDGNT EITGYTVQKADKKTMEWFTVFEHYRRT HCVVSDLIMGNEYVFRV FSENMCGLSEKPC  
TTKNSAYIQKTGTAYKPPTYKDHEFE EAPKFTHPLNDRSVVAGYNATLSCAVRGI PKPKITWYK  
NKMDLSMEARYRSFSKQGVLTLEVRKPSPF DGGLYTCKAVNEHGVAETE CRLEVR---

Q6IP30\_X\_\_laevis\_Putativ

PEPPKDEIGLFLERPQDGEITVGTNIKFTARIAGANLIK KPVVKWFKGK WMDLTSKVGKHLQLH  
ESYDRNTKIYTFEIQII GAKTTYAGGYRCEVSSKDKFDSCNFNLAVHEAASSGEVDIRAAFRRT  
SLVGAAKRRSDGTEEAGELDFSALLKKRDSFLVNREPKQGT EPDVDVWEILKKAPPSEYEKIAF  
QYGITDLRGLLRLKMKKKEEKKSEAF LKKMDPAYQIDKGQKMKLVVEVANPDAEVKWLKNGQE  
IRVSGSKYIFESIGNKRILTINNCSLADDAAYTCVIGEEKCFTELFVREPP IQILHPLEDQMVM  
VGERVEFMCEVSEEGAQVKWEKDGVELTREETFKYRFFKKGK KHYLLIINETTVEDGGHYKVKTN  
GGDSLAEELMVQEKQLEVLQDVADLTVRAKEQAVFKCEVSD ETVTGIWVKNGKEVIANNRIKITH  
IGRVHKLTIIDDVVPQDEGDYSFIPNGFAFSLSAKLHFMEVKIDFVPRQEPPKIKLDCMSQCADT  
IIVVAGNKLRLDVPIISGDPAPT VVMMKGDKVIEQIKVRTE-----

TESQHDLYRDVDLISEVDGRVHVETHPDHCVFT IIEGAEK SDEGAYTVVVKNEAGEDKANINVKV  
IEVPDPPEAPRISNIGEDFCTVQWDPPKYDGGQPILGYIL ERKKKSYRWMRLNYDLVKELTYE  
SKRMIEGVVYEMRIYAVNSIGMSIPSQHSQPFMPIAPT SEPTMLVDDVSDT S ISLKWRPPERI  
GAGGLDGYTVEYCKEGSTE WVPALLGLTERTSVMIRDLP TGERLAFRVRAINLAGPSEPCTMKE  
PVTIREIMQRPKIWLPRYLRQKLIK KVG ETVNIVIPFQ GKPRPVVTWLKDGQPVDPKQIGIRNS  
EADSILFIRKAERDHSGEYKVQIQIENCEDSATIHIQIVDKPSAPQNLK LVEIWGFNVALEWVP  
PK-----

-----  
-----  
Q0IJ38\_Danio\_rerio\_Zgc\_1 -----  
-----

GLFVERPQTVAAIKGKDVTFVAKVDSSQMLRKPAVKWFKGKWL DLASKAGKHLQFKETYDRNTK  
IYTYEMTIVKVVGDAGGYRCEVTSKDKCDTSAFDVTVEAAEETQQTNI LEAFKRS-----  
--DAGEDAGDLDFSALLKKR-----  
KQKEEPEVDVDVWEILKNAKPCDYEKIAFEYGITDLRGMLTRLKMKKKEPKKSDAFLKKLDPAY  
SVEKGKKIQLSVELTDPNAQVKWLKNGQEIKPSA-  
KYVFESVGGIRKLTINKCTLADDAAYECVVGEEKSFTEVFIQEPPVTITKMLDDAHVVEGDKVE  
FEVEVSDEGANVKWMDGVVELSRD--  
GKYRFKKDGTKHWHLIINEATTEDIGTYVYVYTSGGESKAELEVEERELEVLQSIADLTVKAAEQA  
VFKCEVSDEKVTGKWFKDGVEVVASDRIKMSHIGRTHKLVISDVKPEDAGDYTFVDPGYALSLS  
AKLNFLEIKIDYVPRQEPKIHLDATGSVNKTIIVVAGNKLRFVDVITGEPPTVAWKKGDM--  
-----

EISQAEGRVRVETRKALSCFVIEGAERSDEGLYHITVTNPAGEDKADVFKIVDVPDPPEENVKC  
LGVGEDSASIEWEPPKFDGGVVPKGYLMERKKKGSSRWTKLNFDIYESTTYEAKKMIIEGVFYEM  
RVFAVNGIGISQPSANSQPFMPIAPTSEPTRLTVDDITDGTALKWLP PERIGAGGLDGYFIEY  
CVEGATEWVKANETPVEKNSFRVRGLPVGEKMLFRVTAVNRAGLSPWAVLAQAVTIREIVESPK  
IRLPRHLRTKFIQVGEKVNLVIPFQGKPRPMVTWLKDGAPVDTGLVNI RTSDKDTILFIRQSA  
REHSGLYTLCVQIENMKDKANLEIQIVDKPGPPMAVTVTDVWGFNAALEWKPPKDNNGNTDIIGY  
TVQKADKKTKEWFTVLEHNRPSCTVSDLVMGNEYFFRIFSENICGMSEEAGLSKNTAVIAKTG  
LQYKQPYPYKEKDMNSSPKFITPLVDRSVVAGYSAAISCAVRGCPKPKI IWMKNKMIIGEDPKFL  
MQNNQGVLTNLIRKPSLFDGCKYTCKAINDLGEDEVECRLEVRV--

UPI00015A7A35\_Danio\_reri -----  
-----

GLFVERPQTVAAIKGKDVTFVAKVDSSQMLRKPAVKWFKGKWL DLASKAGKHLQFKETYDRNTK  
IYTYEMTIVKVVGDAGGYRCEVTSKDKCDTSAFDVTVEAAEETQQTNI LEAFKRS-----  
--DAGEDAGDLDFSALLKKR-----  
KQKEEPEVDVDVWEILKNAKPCDYEKIAFEYGITDLRGMLTRLKMKKKEPKKSDAFLKKLDPAY  
SVEKGKKIQLSVELTDPNAQVKWLKNGQEIKPSA-  
KYVFESVGGIRKLTINKCTLADDAAYECVVGEEKSFTEVFIQEPPVTITKMLDDAHVVEGDKVE  
FEVEVSDEGANVKWMDGVVELSRD--  
GKYRFKKDGTKHWHLIINEATTEDIGTYVYVYTSGGESKAELEVEERELEVLQSIADLTVKAAEQA  
VFKCEVSDEKVTGKWFKDGVEVVASDRIKMSHIGRTHKLVISDVKPEDAGDYTFVDPGYALSLS  
AKLNFLEIKIDYVPRQEPKIHLDATGSVNKTIIVVAGNKLRFVDVITGEPPTVAWKKGDM--  
-----

EISQAEGRVRVETRKALSCFVIEGAERSDEGLYHITVTNPAGEDKADVFKIVDVPDPPEENVKC  
LGVGEDSASIEWEPPKFDGGVVPKGYLMERKKKGSSRWTKLNFDIYESTTYEAKKMIIEGVFYEM  
RVFAVNGIGISQPSANSQPFMPIAPTSEPTRLTVDDITDGTALKWLP PERIGAGGLDGYFIEY  
CVEGATEWVKANETPVEKNSFRVRGLPVGEKMLFRVTAVNRAGLSPWAVLAQAVTIREIVESPK  
IRLPRHLRTKFIQVGEKVNLVIPFQGKPRPMVTWLKDGAPVDTGLVNI RTSDKDTILFIRQSA  
REHSGLYTLCVQIENMKDKANLEIQIVDKPGPPMAVTVTDVWGFNAALEWKPPKDNNGNTDIIGY  
TVQKADKKTKEWFTVLEHNRPSCTVSDLVMGNEYFFRIFSENICGMSEEAGLSKNTAVIAKTG

LQYKPQPYKEKDMNSSPKFITPLVDRSVVAGYSAAISCAVRGCPKPKI IWMKNKMI IGEDPKFL  
MQNNQGVLTNLIRKPSLFDGCGKYTCKAINDLGEDEVECRLEVRV--

UPI00015A7A37\_Danio\_reri

GLFVERPQTVAAIKGKDVTFVAKVDSSQMLRKP AVKWFKGKWL DLASKAGKHLQFKETYDRNTK  
IYTYEMTIVKVVGDAGGYRCEVTSKDKCDSA FVDVTEAAEETQQTNI LEAFKRS-----  
--DAGEDAGDLDFSALLKKR-----

KQKEEPEVDVDVWEILKNAKPCDYEKIAFEYGITDLRGMLTRLKMKKKEPKKSDAFLKKLDPAY  
SVEKGKKIQLSVELTDPNAQVKWLKNGQEIKPSA-

KYVFESVGGIRKLTINKCTLADDAAYECVVGEEKSFTEVFIQEPVVTITKMLDDAHVVEGDKVE  
FEVEVSDEGANVKWMDGVLSRD--

GKYRFFKKGDKHWHLIINEATTEDIGTYVYVYTSGGESKAELEVEERELEVLQSIADLTVKAAEQA  
VFKCEVSDEKVTGKWFKDGVEVVASDRIKMSHIGRTHKLVISDVKPEDAGDYTFVDPGYALSLS  
AKLNFLEIKIDYVPRQEPKIHLDATGSVNKTIIVVAGNKLRFVDVITGEPPTVAVKKGDM--  
-----

EISQAEGRVRVETR KALSCFVIEGAERSDEGLYHITVTNPAGEDKADVFKIVDVPDPENVKC  
LGVGEDSASIEWEPPKFDGGVPVKGYLMERKKKSSRWTKLNFDIYESTTYEAKKMIIEGVFYEM  
RVFAVNGIGISQPSANSQPFMPIAPTSEPTRLTVDDITDGT CALKWLPPERIGAGGLDGYFIEY  
CVEGATEWVKANETPVEKNSFRVRGLPVGEKMLFRVTAVNRAGLSPWAVLAQAVTIREIVESPK  
IRLPRHLR TKFIRQVGEKVN LVI PFQ GKPRPMVTWLKDGAPVDTGLVNI RTS DKDTILFIRQSA  
REHSGLYTLCVQIENMKDKANLEIQIVDKPGPPMAVTVTDVWGFNAALEWKPPKDNGNTDIIGY  
TVQKADKKTKEWFTVLEHNRPSCTVSDLVMGNEYFFRIFSENICGMSEEAGLSKNTAVIAKTG  
LQYKPQPYKEKDMNSSPKFITPLVDRSVVAGYSAAISCAVRGCPKPKI IWMKNKMI IGEDPKFL  
MQNNQGVLTNLIRKPSLFDGCGKYTCKAINDLGEDEVECRLEVRV--

Q4T9D9\_T\_nigroviridis\_C

GKDVTFVAQVDSSHLLRKPMTMKWLKGGKWL DLGSKAGKHLKFKETYDRSTKIYTYEMS I IKVVVDG  
DAGGYRCEVTSKDKCDSCTFEVGV EAVQEEQQDNILEAFKRS-----  
DAGEDAGELDFSALLRKR-----

KKQQEVKKEEVDVWEILKAAKPCDYEKIAFEYGITDLRGMLKRLKMKKKEPKKSDAFLRKLDPAY  
SVDKGGKKIQLSVEVADPDAPIRWLKNGQEIKPSA-

KYVFESVGNKRTLTINKCSLSDDAAYECVVGDEKSFTEV FVKEPPVTITKLLDDVHTVVGERVE  
FEVEVSEEGANVKWMDGVELTREAASKFRFKKDGKKHILINEATKEDMGTYQVFTNGGESKA  
ELEVEDKELQVLQSIADLTVKSSEQAVFKCEVSDEKVTGKWFKDGVEVQPSERIKMTHIGRTHK  
LTIDDVKPSDAGDYTFVPNGYALSLSAKLNFLEIKIDYVPRQDPPKIHLDTSGASSKVITVVAG  
NKLRLDVEISGEPAPTVCWTRGNQ---

VRIPPAGPAAAAGAVTL PPLCVGRQVVSEAEGRVRVETR KTLSSFVIEGAMKEDEGAYSITVNN  
PAGEDKAELFVKIVDVPNPPENVKCTSVGEDCATVTWEP PAFDGGVPVKGYLMERKKVGSRWTK  
LNFDVYESTAYEAKKMIIEGVLYEMRVYAVNGIGVVSQPSANSKPFMPIAPTSEPIRLTVEDVTD  
TTCTLKW RPPEKIGAGGIDGYVVEYCKAGTEEWVQANQELVERNQYKVKELPVGEKMLFRVVAV  
NIAGRSPPATLPQAVTIREIMEHPRI R LPRHLR TKLTVVVGQKVN LVI PFQ GKPRPVATWLKDS  
APLEDRSVGT RTSEVDSILFIRSAERHSGTYT LSVQIENMLDSADIRIQVVDKPGPPPTDVQIT  
EVWGFNVSLEWKPPKDDGNCEIIGYTI EKADLKTREWFTVYEHNRPGCTVSDLVIGNEYSFRV  
FSENICGLSEEAGVSRNTAVIAKTGLAYNPLPFKEKDVSCCPKFTAPLVDRSVVAGYPTAISCA

VRGHPKPKITWMKNSM VIGEDPKYLMQNKQGVLT LNIRKPGLFDSGRYSCRAVNDLGQDEVECR  
VEVR---

Q5BJ14\_Danio\_rerio\_Zgc\_1

-----  
-----  
PTELTGLFVEKPE SVVAIAGKDVT FVVKVDSTNLTRKPTMKWLK GKWMDLGSKAGKHIQLKETY  
DRNTKIYTYEMKLVKVVPGDAGGYRCEVSAKDKCDSCTFEVTVEAAEQEQQADILSAFKRA---

-----DAGEDEGLDF SALLKAA-----K--  
KKKPEPELEVDVWELLKSAHPSEYEKIAFKYGITDLRGLMLKRLKMKVPEPKFSEAF LRRLLESAY  
SVNKGKKIVMSVEVADPNAEVKWLNRNGQEIKPSA-

KYIMEADGNIRTLTINKCSLADDAAYECVAGTDKCFTEVFVKEPPITITKLLDDYHV VVGERVE  
FEIEVSEEGAHVIWLFEDQQLSREDKSKYRFFKKGKRHCLIIQEATLEDNGMFYVYTNGGQSKG  
ELIVEEKELEVLQSIADLTVKSAEQAMFKCEV SDEKVTGKWFKDGVEVLPDRIKISHIGRIHR  
LTIDDVKPGDAGDYTFVPGDYALSISPKNLFLEIKIDYVPRQDPPKIHLDVSGNVSQTIIVVAG  
NKLRLDVEITGEPAPTVCWMRDDK-----

PVTDSEGRVRVENKKDLSCFIIEGAEREDEGN YTITVTN PAGEDKANLFIKIVDVPDPPE NVKC  
TGVGEDTANIVWDPKFDGGAPLKG YLMERKKKGSSRWTKLNF DVYASTTYEAKRMIEGILYEM  
RVFAVNGIGISAPSLNSKPFMPIAPTSEPTKLTVD DVTDTTCSLKWLAPEKIGAGGLDGYIIEF  
CKEGESEWHPANTDLVERQSFVVRNLPTG EKMNFRVAVNIAGRSP PALLGQPVTVREIMEHPK  
IRLPRDLRTKYIRR VGEKINLVIPFQ GKPRPIATWLKDGQPVDEKKVGV RNSNVDSILFIRAAE  
RDHSGKYTLILKIENMEDSATIEIRIVDKPGPPIGVHVTDVWGFNAALEWKPPKDDGNCEITGY  
TIQKAEKKTKEWFTVYEHNRRTNCTVSDLIIGNE YMFRVYSENLCGLSEDPCMSKNNAIISKSG  
LDYKPPPYKEKDMNCAPKFTAPLVDRAVTIGYSTAISCAVRAFPKPKI IWMKNKMIIGDDPKFL  
MQNNQGVLT LNIRKPSTFDSGKYSCRAVNELGEDEVECKLEIK---

P16419\_G\_gallus\_Myosin\_

-----  
-----  
DPEGLFLSKPQNMVESGRDVTVSARVAGAALPCAPAVKWFK GKWAELGDKSA-RCRLRHSVD-  
DDKVHTFELTITKVAMGDRGDYRCEVTAKEQKDCSFSIDVEAP-RSSEGNVLQAFKRT-----  
-----GGKDDTAGELDFSGLLKKR--

EVEEKKKDEDDQFPPEI WELLLKGTCKSEYERIAFYQYGITDLRGLMLKRLKKVHVEPKKSEAFIRK  
LDPAYQVDKGNKIKLVVELSDPDLPLKWKYKNGQLLKPST-

KYVFENVGLKRIILTIHKCSLADDAAYECRVNDEKCFTEVFVKEPPVTVVRGLEDQQV VVGDRVV  
LEAEVSEEGAQVMWLKDGVDVTRDDAFKYRFFKKGKHF LII NEAELSDSAHYKIMTNGGESEA  
ELSVEEKQLEVLQDMADLTVKASEQAVFKCEV SDEKVTGRWFRNGVEVKPSKRIHISHNGRFHK  
LVIDDV RPEDEGDYTFIPDGYALSLSAKLNFLEIKVEYVPKQEPKIHLDCSGKAAETIVVVAG  
NKVRLDVPI SGE PAPTVTWKRGDQ-----

LFTATEGRVHIDSQADLSSFVIESAERSDEGRY CITVTNPVGEDSATLHVRVVDVPDP PQSVRV  
TSVGEDWAVLSWEAPPFDGGMPITGYLMERKKKGSMRWMLNF EVFPDTTYESTKMIEGV FYEM  
RVFAVNAIGVSQPSLNTQPFMPIAPTSEPTHVLE DVTDTTATIKWRPPERIGAGGVDGYLVEW  
CREGSNEWVAANTELVERCGLTARGLPTGERLLFRVISVMAGKSPPATMAQPVTIREIVERPK  
IRLPRHLRQTYIRR VGEQVNLVIPFQ GKPRPQVTWSREGGAL-

PAEVQTRTSDVDSVFFIRSAARPLSGNYEMRVRIDNMEDCATLRLRVVERPGPPQAVRVM EVWG  
SNALLQWEPKDDGNAEISGYTVQKADTRTMEWFTVLEHSRPT RCTVSELVMGNEYRFRVYSEN  
VCGTSQEPATSHNTARIAKEGLTLKMVPYKERDLRAAPQFLTPLVDRSVVAGYTVTLNCAVRGH  
PKPKVTWLKNSVEIGADPKFLSRHGLGVL SLLIRRP GPFDDGGTYGCRAVNEMGEATTECR LDVR  
VPQ

UPI000059FDA7\_Canis\_lupu

-----  
-----  
EEPTGIFLKKPDSVSVENGK DTHIVAKVNGKELPGKPTIKWFKGKWLELGSKSGARFSFKESH  
SASNVTVELHIGKVVLDGRGNRLEVKAKDFCDSCAFNIDVEAPRHNTSVQGLESFKRT----  
-----GGKSEDGGELDFSSLLKKREVVE-  
KKKDDDDLGIPPEIWELLKGAKKSEYEKIAFQYGITDLRGMLKRLKKAKVEVKKSAAF TKKLD  
AYQVDRGNKIKLVVEISDPDLPLKWKYKNGQEIKPSS-  
KYVFENVGKKRILTINKCTLADDAAYEVAVKDEKCFTELFVKEPPVLIVKPLEDQQV FVGDRVE  
MSVEVSE DGAQVMWMDGVELTRED SFKYRFKKDGKRHILYSDVTLEDGGRYQVMTNGDQCEA  
DLIVEEKQLEVLQDIADLTVKASEQAVFKCEVSDEKVTGKWKYKNGIEVRPSKRITISHVGRFHK  
LVIDDVRPEDEGDYTFVDPGYALSLSAKLNFLEIKVEYVPKQEPKIHLD CSGKTSESLVVVAG  
NKLRLDVSITGEPRPVATWLKGDE-----  
VFTATEGRIRLEHQTDSSSFVIESADRADEGRYTIKVTNPVGEDVASIFLRVVDVDPDPPEAVRV  
TSVGEDWAILVWEPPKYDGGQPVTGYLLERKKKGSQRWMLNFEVFTETTYESTKMI EGILYEM  
RVFAVNAIGVSQPSMNTKPFMPIAPTSEPLHLMVEDVTDTTTTLTKWRPPDRIGAGGIDGYLVEY  
CLEGSEDWVPANTELTERCGFTVKNLPTGAKILFRVVAINIAGRSQPASLFQPVTIREIVQQPK  
IRLPRHLRQTYIRKVG EHLNLVIFPQ GKPRPQV VWTGKGAPVDPARVHVRTSDFDTVFFVRQAA  
RSDSGEYELTVQIENMKDTATIHIQVVEKAGPAENVMVKEVWGTNALVEWQPPKDN GNSEITGY  
FVQKADKKTMEWFTVYEHNRHTSCTVPDLIVGNEYFRVFSENICGLSDSPGVSKNTARILKTG  
ITFKPLEYKEHDFRTPPKFLTPLPDRVVVAGYAAALNCAVRGYPKPKVVMKNQMEIREDPKFL  
MTNYQGVLTNLNIRRPSPF DAGTYSCRAVNELGEALAECKLEVRVPQ

UPI0000EB459A\_Canis\_lupu

-----  
-----  
EEPTGIFLKKPDSVSVENGK DTHIVAKVNGKELPGKPTIKWFKGKWLELGSKSGARFSFKESH  
SASNVTVELHIGKVVLDGRGNRLEVKAKDFCDSCAFNIDVEAPRHNTSVQGLESFKRT----  
-----GGKSEDGGELDFSSLLILREVVE-  
KKKDDDDLGIPPEIWELLKGAKKSEYEKIAFQYGITDLRGMLKRLKKAKVEVKKSAAF TKKLD  
AYQVDRGNKIKLVVEISDPDLPLKWKYKNGQEIKPSS-  
KYVFENVGKKRILTINKCTLADDAAYEVAVKDEKCFTELFVKEPPVLIVKPLEDQQV FVGDRVE  
MSVEVSE DGAQVMWMDGVELTRED SFKYRFKKDGKRHILYSDVTLEDGGRYQVMTNGDQCEA  
DLIVEEKQLEVLQDIADLTVKASEQAVFKCEVSDEKVTGKWKYKNGIEVRPSKRITISHVGRFHK  
LVIDDVRPEDEGDYTFVDPGYALSLSAKLNFLEIKVEYVPKQEPKIHLD CSGKTSESLVVVAG  
NKLRLDVSITGEPRPVATWLKGDE-----  
VFTATEGRIRLEHQTDSSSFVIESADRADEGRYTIKVTNPVGEDVASIFLRVVDVDPDPPEAVRV  
TSVGEDWAILVWEPPKYDGGQPVTGYLLERKKKGSQRWMLNFEVFTETTYESTKMI EGILYEM  
RVFAVNAIGVSQPSMNTKPFMPIAPTSEPLHLMVEDVTDTTTTLTKWRPPDRIGAGGIDGYLVEY  
CLEGSEDWVPANTELTERCGFTVKNLPTGAKILFRVVAINIAGRSQPASLFQPVTIREIVQQPK  
IRLPRHLRQTYIRKVG EHLNLVIFPQ GKPRPQV VWTGKGAPVDPARVHVRTSDFDTVFFVRQAA  
RSDSGEYELTVQIENMKDTATIHIQVVEKAGPAENVMVKEVWGTNALVEWQPPKDN GNSEITGY  
FVQKADKKTMEWFTVYEHNRHTSCTVPDLIVGNEYFRVFSENICGLSDSPGVSKNTARILKTG  
ITFKPLEYKEHDFRTPPKFLTPLPDRVVVAGYAAALNCAVRGYPKPKVVMKNQMEIREDPKFL  
MTNYQGVLTNLNIRRPSPF DAGTYSCRAVNELGEALAECKLEVRVPQ

UPI00015A4C4C\_Danio\_reri

PTELTGLFVEKPESVVAIAGKDVTFFVVKVDSTNLTRKPTMKWLKGGKMDLGSKAGKHIQLKETY  
DRNTKIYTYEMKLVKVVPGDAGGYRCEVSAKDKCDSCTFEVTVEAAEQEQQADILSAFKRA---  
-----DAGEDEGLDFSAALLKAA----K--  
KKKPEPELEVDVWELLKSAHPSEYEKIAFKYGITDLRGMLKRLKMKKVEPKFSEAFLLRLESAY  
SVNKGKKIVMSVEVADPNAEVKWLNRNGQEIKPSA-  
KYIMEADGNIRTLTINKCSLADDAAYECVVGTDKCFTEVFVKEPPITITKLLDDYHVVVGERVE  
FEIEVSEEGAHVIWLFEDQQLSREDKSKYRFFKKDGKRHCLIIQEATLEDNGMFYVYTNGGQSKG  
ELIVEEKELEVLQSIADLTVKSAEQAMFKCEVSDEKVTGKWFKDGVEVLPDRIKISHIGRIHR  
LTIDDVKPGDAGDYTFVPDGYALSISAKLNFLEIKIDYVPRQDPPKIHLDVSGNVSQTIIVVAG  
NKLRLDVEITGEPAPTVCWMRDDK-----  
PVTDSEGRVRVENKDLSCFIIEGAEREDEGNYYITVTNPAGEDKANLFIKIVDVPDPPEENVKC  
TGVGEDTANIVWDPKFDGGAPLKGYLMEKGGSSRWTKLNFVDVYESTTYEAKRMIEGILYEM  
RVFAVNGIGISAPSLNSKPFMPIAPTSEPTKLTVDVDTTCSLKWLAPEKIGAGGLDGYIIEF  
CKEGESEWHPANTDLVERQSFVVRNLPTGKEMNFRVAVNIAGRSPALLGQPVTVREIMEHPK  
IRLPRDLRTKYIRRVGEKINLVIPFQGKPRPIATWLKDGQPVDEKKVGVNRNSVDSILFIRAAE  
RDHSGKYTLTLKIENMEDSATIEIRIVDKPGPPIGVHVTDVWGFNAALEWKPPKDDGNCEITGY  
TIQKAEEKTKEWFTVYEHNRRTNCTVSDLIIGNEYMFRVYSENLCGLSEDPCMSKNNAIISKSG  
QKLNVPDLKRNDQHAIGSFSVSPAIITVTIGYSTAISCRAVAFPKPKIWMKNKMIIGDDPKFL  
MQNNQGVLTNLNIRKPSTFDSGKYSCRAVNELGEDEVECKLEIK---

UPI0000D8BC93\_Danio\_reri

-----  
-----  
-----  
IGKDVTFFVAKVDSSQMLRKPAAKWFKGGKWLDLASKAGKHLQFKETYDRNTKIYTYEMTIVKVVD  
GDAGGYRCEVTSKDKCDTSAFDVTVEAAEETQQTNIILEAFKRS-----  
DAGEDAGDLDFSAALLKKS-----  
HSWKQKEEPEVDVDVWEILKNAKPCDYEKIAFEYGITDLRGMLTRLKMKKKEPKKSDAFLKLLD  
PAYSVEKGGKIQLSVELTDPNAQVKWLKNGQEIKPSANKYVFESVGGIRKLTINKCTLADDAAY  
ECVVGEEKSFTEVFIQEPPVTITKMLDDAHVVEGDKVEFEVEVSDEGANVKWMKDGVELSRD--  
GKYRFFKKGDKTKHWLIINEATTEDIGTYVYVYTSGGESKAELEVEERELEVLQSIADLTVKAAEQA  
VFKCEVSDEKVTGKWFKDGVEVVASDRIKMSHIGRTHKLVISDVKPEDAGDYTFVPDGYALSLS  
AKLNFLE-----EPPKIHLDATGSVNKTIIVVAGNKLRFVDVITGEPPTVAWKKGDM--  
-----

EISQAEGRVRVETRKALSCFVIEGAERSDEGLYHITVTNPAGEDKADVFKIVDVPDPPEENVKC  
LGVGEDSASIEWEPPKFDGGVPVKGYLMEKGGSSRWTKLNFDIYESTTYEAKKMIEGVIFYEM  
RVFAVNGIGISQPSANSQPFMPIAPTSEPTRLTVDDITDGTCAKWLPPERIGAGGLDGYFIEY  
CVEGATEWVKANETPVEKNSFRVRGLPVGEKMLFRVTAVNRAGLSPWAVLAQAVTIREIVESPK  
IRLPRHLRTKFIQVGEKVNLVIPFQGKPRPMVTWLKDGAPVDTGLVNIIRTSKDTILFIRQSA  
REHSGLYTLCVQIENMKDKANLEIQIVDKPGPPMAVTVTDVWGFNAALEWKPPKDNNGNTDIIGY  
TVQKADKKTKEWFTVLEHNRRPSCVSDLVMGNEYFFRIFSENICGMSEEAGLSKNTAVIAKTG  
LQYKQPYKEKDMNSSPKFITPLVDRSVVAGYSAAISCAVRGCPKPKIWMKNKMIIGEDPKFL  
MQNNQGVLTNLNIRKPSLFDGCKYTCKAINDLGEDEVECRLEVR---

UPI000059FDA5\_Canis\_lupu

-----  
-----  
-----  
EEPTGIFLKKPDSVSVENGKDTTHIVAKVNGKELPGKPTIKWFKGKWLELGSKSGARFSFKESH  
SASNYYTVELHIGKVVLGDRGNRLEVKAKDFCDSCAFNI DVEAPRHNTSVQGLESFKRT----

-----GGKSEDGGELDFSSLLKKREVVE-  
KKKDDDDLGIPPEIWELLKGAKKSEYEKIAFQYGITDLRGMLKRLKAKVEVKKSAAFTKKLDP  
AYQVDRGNKIKLVVEISDPDLPLKWKYKNGQEIKPSS-  
KYVFENVGKKRIILTINKCTLADDAAYEVAVKDEKCFTELFVKEPPVLIVKPLEDQQVFGDRVE  
MSVEVSEEDGAQVMWMDGVELTREDSEFKYRFFKDGKRHILIIYSDVTLEDGGRYQVMTNGDQCEA  
DLIVEEKQLEVLQDIADLTVKASEQAVFKCEVSDEKVTGKWKYKNGIEVRPSKRITISHVGRFHK  
LVIDDVRPEDEGDYTFVDPGYALSLSAKLNFL-----  
EPPKIHLDSCGKTSESLVVVAGNKLRLDVSITGEPRPVATWLKGDE-----

VFTATEGRIRLEHQTDSSSFVIESADRADEGRYTIKVTNPVGEDVASIFLRVVDVDPPEAVRV  
TSVGEDWAILVWEPPKYDGGQPVTGYLLERKKKGSQRWMKLNFEVFTETTYESTKMIIEGILYEM  
RVFAVNAIGVSQPSMNTKPFMPIAPTSEPLHLMVEDVTDTTTTLKWRRPPDRIGAGGIDGYLVEY  
CLEGSEDWVPANTELTERCGFTVKNLPTGAKILFRVVAINIAGRSQPASLFQPVITIREIVQQPK  
IRLPRHLRQTYIRKVGHEHLNLVIFPQKPRPQVVWTKGGAPVDPARVHVRTSDFDVTFFVRQAA  
RSDSGEYELTVQIENMKDTATIHIQVVEKAGPAENVMVKEVWGTNALVEWQPPKDNNGNSEITGY  
FVQKADKKTMEWFTVYEHNRHTSCTVPDLIVGNEYFRVFSENICGLSDSPGVSKNTARILKTG  
ITFKPLEYKEHDFRTPPKFLTPLPDRVVVAGYAAALNCAVRGYPKPKVVMKNQMEIREDPKFL  
MTNYQGVLTNLNIRRPSPFDAAGTYSCRAVNELGEALAECKLEVRVPQ  
UPI000154F1E6\_R\_norvegi-----

EEPTGLFLKPKPDSVSVETGKDTVILAKVNGKELPGKPSIKWFKGKWQELGSKSGARFTFKESH  
SASNVTVELHIGKVVVLGDRGDRLEVKAKDVCDSCFPNVVVEAPRQDSSGQSLESFKRS-----  
-----GGKSEDAGELDFSGLLKKREVVE-  
KKKDDDDLGIPPEIWELLKGAKKSEYEKIAFQYGITDLRGMLKRLKAKVEVKKSAAFTKKLDP  
AYQVDRGNKIKLVVEISDPDLPLKWKYKNGQEIKPSS-  
KYVFENVGKKRIILTINKCTLADDAAYEVAVKDEKCFTELFVKEPPVLIVTPLEDQQVFGDRVE  
MSVEVSEEGAQVMWMDGVEMTREDSYKYRFFKDGKRHILIIYSDVAQEDGGRYQVITNGGQCEA  
ELIVEEKQLEVLQDIADLTVKASEQAVFKCEVSDEKVTGKWKYKNGVEVRPSKRITISHVGRFHK  
LVIDDVRPEDEGDYTFVDPGYALSLSAKLNFLLEIKVEYVPKQEPKIHLDSCGKTSDSIVVVAG  
NKLRLDVAITGEPPTATWLKGDE-----

VFTVSEGRTRIEQRPDCSSSFVIESAERSDEGRYTIKVTNPAGEDVASIFLRVVDVDPPEAVRV  
TSVGEDWAILVWEPPKYDGGQPVTGYLMERKKKGSHRWMKLNFEVFTDTTYESTKMIIEGVLYEM  
RVFAVNAIGVSQPSMNTKPFMPIAPTSAPQHLTVEDVTDTTTTLKWRRPPDRIGAGGIDGYLVEY  
CLEGSEEWVSANKEPVERCGFTVKDLPTGARILFRVVGVNIAGRSEPATLLQPVITIREIVEQPK  
IRLPRHLRQTYIRKVGHEALNLVIFPQKPRPQVVWTKGGAPLDTSRVNVRTSDFDVTFFVRQAA  
RSDSGEYELSVQIENMKDTATIRIRVVEKAGPAENVMVKEVWGTNALVEWQPPKDDNGNSEITGY  
FVQKADKKTMEWFNVYEHNRHTSCTVSDLIIVGNEYFRVFSENICGLSDSPGVSKNTARILKTG  
ITLKPMEYKEHDFRTAPKFLTPLMDRVVVAGYAAALNCAVRGHPKPKVVMKNKMEIHEDPKFL  
ITNYQGILTLNIRRPSPFDAAGTYSCRAFNELGEALAECKLDVRVPQ  
Q5XKE0\_Mus\_musculus\_Myos-----

EEPTGIFLKPKPDSVSVETGKDAVILAKVNGKELPGKPTIKWFKGKWQELGSKSGARFIKESH  
STSNVTVELHIGKVVVLGDRGDRLEIKAKDVCDSCSFPNVVVEAPRQDSSGQSLESFKRS-----  
-----GGKSEDAGELDFSGLLKKREVVE-  
KKKDDDDLGIPPEIWELLKGAKKSEYEKIAFQYGITDLRGMLKRLKAKVEVKKSAAFTKKLDP



AYQVDRGNKIKLVVEISDPDLPLKWFKNGQEIKPSS-  
KYVFENVGKKRILTINKCTLADDAAYEVAVQDEKCFTELFVKEPPVLIVTPLEDQQVFGDRVE  
MSVEVSEEGAQVMWMDGVEMTREDSYKYRFKKDGKRHILYSDVAQEDGGRYQVITNGGQCEA  
ELIVEEKQLEVLQDIADLTVKAAEQAVFKCEVSDEKVTGKWKYKNGVEVRPSKRITISHVGRFHK  
LVIDDVRPEDEGDYTFVDPGYALSLSAKLNFLEIKVEYVPKQEPKIHLDSCSGKTSDSIVVVAG  
NKLRLDVAITGEPPTATWLRGDE-----

VFTATEGRTHIEQRPDCSSFVIESAERSDEGRYTIKVTNPVGEDVASIFLRVVDVDPPEAVRV  
TSVGEDWAILVWEPKPYDGGQPVTGYLMERKKKGSQRWMKINFVFTDTTYESTKMIIEGVLYEM  
RVFAVNAIGVSQPSMNTKPFMPIAPTSAPQHLTVEDVTDTTTTLTKWRPPDRIGAGGIDGYLVEY  
CLEGSEEWVPANKEPVERCGFTVKDLPTGARILFRVVGVIAGRSEPATLLQPVTIREIVEQPK  
IRLPRHLRQTYIRKVGEALNLVIFPQKPRPQVVWTKGGAPLDSRVNVRTSDFDTVFFVRQAA  
RSDSGEYELSVQIENMKDTATIRIRVVEKAGPAENVMVKEVWGTNALVEWQPPKDDGNSEITGY  
FVQKADKKTMEWFNVEYHNRHTSCTVSDLIVGNEYFYFRIFSENICGLSDSPGVSKNTARILKTG  
ITLKPLEYKEHDFRTAPKFLTPLMDRVVAGYTAALNCAVRGHPKPKVVMKNKMEIHEDPKFL  
ITNYQGILTLNIRPSPFDAGTYSCRAFNELGEALAECKLDVRVPQ

A1L4G9\_Homo\_sapiens\_Myos -----

-----  
EEPTGVFLKKPDSVSVETGKDAVVAVKNGKELPKPTIKWFKGKWLELGSKSGARFSFKESHN  
SASNVTVELHIGKVVLGDRGYRLEVKAKDTCDSCGFNIDVEAPRQDASGQSLESFKRT----

-----  
SKKSDTAGELDFSGLLKKREVVEKKKKDDDDLGIPEIWELLKGAKKSEYEKIAFQYGITDLRG  
MLKRLKKAKVEVKKSAAFTKKLDPAYQVDRGNKIKLMVEISDPDLTLKWFKNGQEIKPSS-  
KYVFENVGKKRILTINKCTLADDAAYEVAVKDEKCFTELFVKEPPVLIVTPLEDQQVFGDRVE  
MAVEVSEEGAQVMWMDGVELTREDSEFKYRFKKDGKRHILIFSDVVQEDRGRYQVITNGGQCEA  
ELIVEEKQLEVLQDIADLTVKASEQAVFKCEVSDEKVTGKWKYKNGVEVRPSKRITISHVGRFHK  
LVIDDVRPEDEGDYTFVDPGYALSLSAKLNFLEIKVEYVPKQEPKIHLDSCSGKTSEAIVVVAG  
NKLRLDVSITGEPVATWLKGDE-----

VFTTTEGRTRIEKRVDCSSFVIESAQREDEGRYTIKVTNPVGEDVASIFLQVVDVDPPEAVRI  
TSVGEDWAILVWEPKPYDGGKPVVTGYLVERKKKGSQRWMKLNFEVFTETTYESTKMIIEGILYEM  
RVFAVNAIGVSQPSMNTKPFMPIAPTSAPQHLTVEDVTDTTTTLTKWRPPDRIGAGGIDGYLVEY  
CLEGSEEWVPANTEPVERCGFTVKNLPTGARILFRVVGVIAGRSEPATLAQPVTIREIAEPPK  
IRLPRHLRQTYIRKVGEQLNLVVPFQKPRPQVVWTKGGAPLDSRVHVVRTSDFDTVFFVRQAA  
RSDSGEYELSVQIENMKDTATIRIRVVEKAGPPINVMVKEVWGTNALVEWQAPKDDGNSEIMGY  
FVQKADKKTMEWFNVEYERNRHTSCTVSDLIVGNEYFYFRVYTENICGLSDSPGVSKNTARILKTG  
ITFKPFEYKEHDFRMAPKFLTPLIDRVVAGYSAALNCAVRGHPKPKVVMKNKMEIREDPKFL  
ITNYQGVTLNIRPSPFDAGTYTCRAVNELGEALAECKLEVRVPQ

Q14324\_Homo\_sapiens\_Myos -----

-----  
EEPTGVFLKKPDSVSVETGKDAVVAVKNGKELPKPTIKWFKGKWLELGSKSGARFSFKESHN  
SASNVTVELHIGKVVLGDRGYRLEVKAKDTCDSCGFNIDVEAPRQDASGQSLESFKRT----

-----  
SKKSDTAGELDFSGLLKKREVVEKKKKDDDDLGIPEIWELLKGAKKSEYEKIAFQYGITDLRG  
MLKRLKKAKVEVKKSAAFTKKLDPAYQVDRGNKIKLMVEISDPDLTLKWFKNGQEIKPSS-  
KYVFENVGKKRILTINKCTLADDAAYEVAVKDEKCFTELFVKEPPVLIVTPLEDQQVFGDRVE  
MAVEVSEEGAQVMWMDGVELTREDSEFKYRFKKDGKRHILIFSDVVQEDRGRYQVITNGGQCEA

ELIVEEKQLEVLQDIADLTVKASEQAVFKCEVSDEKVTGKWKYKNGVEVRPSKRITISHVGRFHK  
LVIDDVRPEDEGDYTFVPDGYALSLSAKLNFLEIKVEYVPKQEPPKIHLDSCSGKTSEAI VVVAG  
NKLRLDVSITGEPPP VATW LK GDE-----  
VFTTTEGRTRIEKRVDCSSFVIESAQREDEGRYTIKVTNPVGEDVASIFLQVVDVDPPEAVRI  
TSVGEDWAILVWEP MYDGGKPV TGYLVERKKKGSQRW MKNLNF E VFTETTYESTKMIEGILYEM  
RVFAVNAIGVSQPSMNTKPFMPIAPTSEPLHLIVEDVTDTTTTLTKWRPPNRIGAGGIDGYLVEY  
CLEGSEEWVPANTEPVERCGFTVKNLPTGARILFRVVG VNIAGRTEPATLAQPVTIREIAEPPK  
IRLPRHLRQTYIRKVG EQLN LVV PFGKPRPQV VWT KGGAPLDTSRVHVRTSDFDTVFFVRQAA  
RSDSGEYELSVQIENMKDTATIRIRVVEKAGPPINVMVKEVWGTNALVEWQAPKDDGNSEIMGY  
FVQKADKKTMEWFNVYERNRHTSCTVSDLIVGNEY YFRVY TENICGLSDSPGVSKNTARILKTG  
ITFKPFEYKEHDFRMAPKFLTPLIDRVV VAGY SAALNCAVRGHPKPKVVMKNKMEIREDPKFL  
ITNYQGVLTLNIRRPSPFDAGTYTCRAVNELGEALAECKLEVRVPQ  
UPI00015DF070\_Mus\_muscul-----  
-----  
-----

EEPTGIFLKKPDSVSVETGKDAVILAKVNGKELPGKPTIKWFKGKWQELGSKSGARFIFKESH  
STSNVYTVELHIGKVVLGDRGDYRLEIKAKDVCDSCSFNV DVEAPRQDSSGQSLESFKRS----  
-----GGKSE DAGELDFSGLLKKREVV E-  
KKKDDDDLGIPPEIWELLKGAKKSEYEKIAFQYGITDLRGMLKRLK KAKVEVKKSAAFTKKLDP  
AYQVDRGNKIKLVVEISDPDLPLKWFKNQEI KPSS-  
KYVFENVGKKRIILTINKCTLADDAAYEVAVQDEKCFTELFVKEPPVLIVTPLEDQQV FVGDRVE  
MSVEVSEEGAQVMWKDGVEMTRED SYKYR FKKDGKRHIL IYSDVAQEDGGRYQVITNGGQCEA  
ELIVEEKQLEVLQDIADLTVKAAEQAVFKCEVSDEKVTGKWKYKNGVEVRPSKRITISHVGRFHK  
LVIDDVRPEDEGDYTFVPDGYALSLSAKLNFLEIKVEYVPKQEPPKIHLDSCSGKTSDSIVVVAG  
NKLRLDVAITGEPPPTATWLRGDE-----  
VFTATEGRTHIEQRPDCSSFVIESAERSDEGRYTIKVTNPVGEDVASIFLRVVDVDPPEAVRV  
TSVGEDWAILVWEPKYDGGQPV TGYLMERKKKGSQRW MKNINFEVFTD TTYESTKMIEGVLYEM  
RVFAVNAIGVSQPSMNTKPFMPIAPTSAPQHLTVEDVTDTTTTLTKWRPPDRIGAGGIDGYLVEY  
CLEGSEEWVPANKEPVERCGFTVKDLPTGARILFRVVG VNIAGRSEPATLLQPVTIREIVEQPK  
IRLPRHLRQTYIRKVG EALNLV I PFGKPRPQV VWT KGGAPLDTSRVNVRTSDFDTVFFVRQAA  
RSDSGEYELSVQIENMKDTATIRIRVVEKAGPAENVMVKEVWGTNALVEWQPPKDDGNSEITGY  
FVQKADKKTMEWFNVYEHNRHTSCTVSDLIVGNEY YFRIF SENICGLSDSPGVSKNTARILKTG  
ITLKPLEYKEHDFRTAPKFLTPLMDRVV VAGY TAALNCAVRGHPKPKVVMKNKMEIHEDPKFL  
ITNYQGILTLNIRRPSPFDAGTYSCRAFNELGEALAECKLDVRAPQ  
UPI0000D617F3\_Homo\_sapie-----  
-----  
-----

EEPTGVFLKKPDSVSVETGKDAVVAKVNGKELPKPTIKWFKGKWLELGSKSGARFSFKESH  
SASNVTVELHIGKVVLGDRGYRLEVKAKDTCDS CGFNIDVEAPRQDASGQSLESFKRT----  
-----  
SKKSDTAGELDFSGLLKKREVV EKKKDDDDLGIPPEIWELLKGAKKSEYEKIAFQYGITDLRG  
MLKRLK KAKVEVKKSAAFTKKLDPAYQVDRGNKIKLMVEISDPDLTLKWFKNQEI KPSS-  
KYVFENVGKKRIILTINKCTLADDAAYEVAVKDEKCFTELFVKEPPVLIVTPLEDQQV FVGDRVE  
MAVEVSEEGAQVMWKDGVELTRED SFKYR FKKDGKRHIL I FSDVVQEDRGRYQVITNGGQCEA  
ELIVEEKQLEVLQDIADLTVKASEQAVFKCEVSDEKVTGKWKYKNGVEVRPSKRITISHVGRFHK  
LVIDDVRPEDEGDYTFVPDGYALSLSAKLNFLEIKVEYVPKQEPPKIHLDSCSGKTSEAI VVVAG  
NKLRLDVSITGEPPP VATW LK GDE-----

VFTTTEGRTRIEKRVDCSSFVIESAQREDEGRYTIKVTNPVGEDVASIFLQVVDVDPPEAVRI  
TSVGEDWAILVWEPPMYDGGKPVGTGYLVERKKKGSQRWMKLNFEVFTETTYESTKMI EGILYEM  
RVFAVNAIGVSQPSMNTKPFMPIAPTSEPLHLIVEDVTDTTTTLKWRRPNRIGAGGIDGYLVEY  
CLEGSEEWVPANTEPVERCGFTVKNLPTGARILFRVVG VNIAGRSEPATLAQPVTIREIAEPPK  
IRLPRHLRQTYIRKVGEQLNLVVPFQ GKPRPVVWTKGGAPLDTSRVHVRTSDFDTVFFVRQAA  
RSDSGEYELSVQIENMKDTATIRIRVVEKAGPPINVMVKEVWGTNALVEWQAPKDDGNSEIMGY  
FVQKADKKTMEWFNVYERNRHTSCTVSDLIVGNEYFRVYTENICGLSDSPGVSKNTARILKTG  
ITFKPFEYKEHDFRMAPKFLTPLIDRVVAGYSAALNCAVRGHPKPKVVMKNKMEIREDPKFL  
ITNYQGVLTNLNIRPSPFDAGTYTCRAVNELGEALAECKLEVRGPQ

UPI00015A4C30\_Danio\_reri

GKDVT FVVKVDSTNLTRKPTMKWLK GKWMDLGSKAGKHIQLKETYDRNTKIYTYEMKLVKVVPG  
DAGGYRCEVSAKDKCDSCTFEVTVEAAEQEQQADILSAFKRA-----  
DAGEDEGDLDFSALLKAA----K--  
KKKPEPELEVDVWELLKSAHPSEYEKIAFKYGITDLRGM LKRLKMKV EPKFSEAF LRRLESAY  
SVNKGKKIVMSVEVADPNAEVKWL RNGQEIKPSA-  
KYIMEADGNIRTLTINKCSLADDAAYECVVGTDKCFTEVFVKEPPITITKLLDDYHV VGERVE  
FEIEVSEEGAHVIWLFEDQQLSREDKSKYRFKKDGKRHCLIIQEATLEDNGMFVYVTNGGQSKG  
ELIVEEKELEVLQSIADLTVKSAEQAMFKCEVSDEKVTGKWFKDGVEVLP SDRIKISHIGRIHR  
LTIDDVKPGDAGDYTFVVPDGYALSISAKLNFLEIKIDYVPRQDPPKIHLDVSGNVSQTIIVVAG  
NKLRLDVEITGEPAPTVCWMRDDK-----  
PVT DSEGRVRVENKKDLSCFIIEGAEREDEGN YTITVTNPAGEDKANLFIKIVDVPDPPE NVKC  
TGVGEDTANIVWDPKFDGGAPLKG YLMERKKKGS SRWTKLNF DVYESTTYEAKRMIEGILYEM  
RVFAVNGIGISAPSLNSKPFMPIAPTSEPTKLTVDVTDTTCSLKWLAPEKIGAGGLDGYIIEF  
CKEGESEWHPANTDLVERQSFVVRNLPTG EKMNFRVAVNIAGRSP PALLGQPVTVREIMEHPK  
IRLPRDLR TKYIRRVGEKINLVI PFQ GKPRPIATWLKDGQPVDEKKVGV RNSNVDSILFIRAAE  
RDHSGKYTLTLKIENMEDSATIEIRIVDKPGPPIGVHVTDVWGFNAALEWKPPKDDGNCEITGY  
TIQKAEKKTKEWFTVYEHNRRTNCTVSDLIIGNEYMFRVYSENLCGLSEDP CMSKNNAIISKSV  
LSIY--PSVRPSIHP---

UPI00015A4C2E\_Danio\_reri

GKDVT FVVKVDSTNLTRKPTMKWLK GKWMDLGSKAGKHIQLKETYDRNTKIYTYEMKLVKVVPG  
DAGGYRCEVSAKDKCDSCTFEVTVEAAEQEQQADILSAFKRA-----  
DAGEDEGDLDFSALLKAA----K--  
KKKPEPELEVDVWELLKSAHPSEYEKIAFKYGITDLRGM LKRLKMKV EPKFSEAF LRRLESAY  
SVNKGKKIVMSVEVADPNAEVKWL RNGQEIKPSA-  
KYIMEADGNIRTLTINKCSLADDAAYECVVGTDKCFTEVFVKEPPITITKLLDDYHV VGERVE  
FEIEVSEEGAHVIWLFEDQQLSREDKSKYRFKKDGKRHCLIIQEATLEDNGMFVYVTNGGQSKG  
ELIVEEKELEVLQSIADLTVKSAEQAMFKCEVSDEKVTGKWFKDGVEVLP SDRIKISHIGRIHR  
LTIDDVKPGDAGDYTFVVPDGYALSISAKLNFLEIKIDYVPRQDPPKIHLDVSGNVSQTIIVVAG  
NKLRLDVEITGEPAPTVCWMRDDK-----

PVTDSEGRVVRVENKKDLSCFIIIEGAEREDEGNYTITVVTNPAGEDKANLFIKIVDVPDPPEENVKC  
TGVGEDTANIVWDPKPKFDGGAPLKGYLMEKRRKSSRWTKLNFVDVYESTTYEAKRMIEGILYEM  
RVFAVNGIGISAPSLNSKPFMPIAPTSEPTKLTVDVDTTCSLKWLAPEKIGAGGLDGYIIEF  
CKEGESEWHPANTDLVERQSFVVRNLPTGEKMNFRVVAVNIAGRSPALLGQPVTVREIMEHPK  
IRLPRDLRTKYIRRVEKINLVIPFQGKPRPIATWLKDGQPVDEKKVGVNRNSNVDSILFIRAAE  
RDHSGKYTLTLKIENMEDSATIEIRIVDKPGPPIGVHVTDVWGFNAALEWKPPKDDGNCEITGY  
TIQKAEKKTKEWFTVYEHNRRTNCTVSDLIIGNEYMFRVYSENLCGLSEDPCKMNNAIISKSV  
LSIY--PSVRPSIHP---  
FIHPCIDRAVTIGYSTAISCRAVRAFPKPKI IWMKNKMIIGDDPKFLMQNNQGVLTNLNIRKPKSTF  
DSGKYSCRAVNELGEDEVECKLEIK---

UPI00006A07B4\_Myosin\_bin

-----  
-----  
-----  
GKDIVLLASVDSSQLTVKPNIKWFKGKWLELGAKSGARFQFKETFDKEKKVYNFELRINKATVA  
DNGGYRCEVISKDKCDSMFNIEVEGKRKTNR-  
NVRNCYQKNVVLMLFLPYSEKKDEDAGELDFSGLLKKRVEDKEQKKDDDDCGIIPD VWELLKNAK  
PSDFERIAFEHGITDLRGMLKRLKVKVKEVKKSEAFGKKLDPCYSVDKGNKIKMQVEVTNPDVQ  
IKWFKNGQEIKPSANRFVFNIGLRRVLTINKCTLADDAAYECIIGDEKCYTELFVKEPPVLIT  
KPLDDTQAFVGDKVELEVEVSEEGAQVIWMKDGTEL TREETFKYRFKKDGKHHILINEATLED  
TGRYQVMTNGGKCEADLQVEEKQLEVLQGIADLTVKATDQAVFKCEVSDEKVTGKWKYKNGVEIK  
PSKRITMTHKGR IHLVIDDVRPEDEADYTFIPDGYALTL SAKLNFLGISTSFSSKIEPPRIHL  
DCSGGQHVTIVVAGNKLRFDVPITGEPAPTVAWFRGNA-----  
CRQCRITLGFKELIFTYKEFNELEGRVHVEIRNEMSSFIIIEGAERADEGSYNIVVTNPVGEDKA  
TLIVKVVDPDPPENV RITSVGEDWAHVIWDPPLYDGGQAVTGYLIERKKKGSQRWMMKNFEV  
TGTEYESVKMIEGVLYEIRVFAVNTIGISQQANTSKPFMPIAPTSEPLHMTVEDVTDTTCTLKW  
RPPDRIGAGGIDGYLIEYCREGSDEWIPSNKEPVERCGFTVKDLPTGEKVSFRVRAVNIAGLSE  
PAVLAQPVTIREIVQQPKIRLPRHLRQTFIKKVGEQVNLVIPFQGKPRPVVTWAKEDKPLDPKQ  
VSIRTSEVDSILFIRSAERAHSGKYVLSVKIENMEDSASINIRIVEKPGPAQVVTVKEVWGFNT  
LLEWQPPKDNNGNSEITGYTIQKADKKTMEWFTVYEHNRQTRCTISDLIMGNEYFRVYSENICG  
LSETPGVSKNTAYIQKTGLVYKPVYDYEHDYSFAPKFLTPLIDRTVVAGYSTALNCAVRGHPKP  
KVIWMKNKVEIRDDPKFLMKHNQGVLTNLNIRKPSPFDDGGTYTCKAVNELGEAEVCKLEVR---

UPI00015A4C31\_Danio\_reri

-----  
-----  
LNTGKDVTFVVKVDSTNLTRKPTMKWLKGWMDLGSKAGKHIQLKETYDRNTKIYTYEMKLVKV  
VPGDAGGYRCEVSAKDKCDSCTFEVTVEAAEQEQQADILSAFKRA-----  
DAGEDEGLDFSALLKAA----  
KNQKKKPEPELEVDVWELLKSAHPSEYEKIAFKYGITDLRGMLKRLKMKVPEPKFSEAFRRLE  
SAYSVNKGKKIVMSVEVADPNAEVKWLNRNGQEIKPSA-  
KYIMEADGNIRTLTINKCSLADDAAYECVVGTDKCFTEVFVKEPPITITKLLDDYHVVVGERVE  
FEIEVSEEGAHVIWLFEDQQLSREDKSKYRFKKDGKRHCLIIQEATLEDNGMFVYVTNGGQSKG  
ELIVEEKELEVLQSIADLTVKSAEQAMFKCEVSDEKVTGKWKFDGVEVLPSDRIKISHIGRIHR  
LTIDDVPGDAGDYTFVVPDGYALSISAKLNFL-----  
DPPKIHLDVSGNVSQTIIVVAGNKLRLDVEITGEPAPTVCWMRDDK-----  
-----

PVTDSEGRVRVENKKDLSCFIIIEGAEREDEGNYTITVTNPAGEDKANLFIKIVDVPDPPEENVKC  
TGVGEDTANIVWDPKFDGGAPLKGYLMEKRRKSSRWTKLNFDVYESTTYEAKRMIEGILYEM  
RVFAVNGIGISAPSLNSKPFMPIAPTSEPTKLTVDVDTTCSLKWLAPEKIGAGGLDGYIIEF  
CKEGESEWHPANTDLVERQSFVVRNLPTGKMNFRVAVNIAGRSPALLGQPVTVREIMEHPK  
IRLPRDLRTKYIRRVGKINLVIPFQGKPRPIATWLKDGQPVDEKKVGRNSNVDSILFIRAAE  
RDHSGKYTLTLKIENMEDSATIEIRIVDKPGPIGVHVTDVWGFNAALEWKPPKDDGNCEITGY  
TIQKAEKKTKEWFTVYEHNRRTNCTVSDLIIGNEYMFRVYSENLCGLSEDPCMSKNNAIISKSV  
LSIY--PSVRPSIHP---  
FIHPCIDRAVTIGYSTAISCAVRAFPKPKIIWMKNKMIIGDDPKFLMQNNQGVLTTLNIRKPSTF  
DSGKYSCRAVNELGEDEVECKLEIK---

;  
end;

*Alignment 3 (MYH7 for MrBayes)*

#NEXUS

begin data;

dimensions ntax=68 nchar=1935;

format datatype=protein missing=? gap=- matchchar=.

matrix

P12883\_Human\_Myosin\_7\_\_\_\_\_

MGDSEMAVFGAAAPYLKSEKERLEAQTRPFDLKKDVFPDDKQEFVKAKIVSREGGKVTAETE  
YGKTVTVKEDQVMQQNPPKFDKIEDMAMLTFLHEPAVLYNLKDRYGSWMIYTYSGLFCVTVNPY  
KWLPVYTPEVVAAAYRGKKRSEAPPHIFSI SDNAYQYMLTDRENQSILITGESGAGKTVNTRVI  
QYFAVIAAIGDRSKKDQSPGKGTLEDQIIQANPALEAFGNAKTVRNDNSSRFGKFIRIHFGATG  
KLASADIETYLLEKSRVIFQLKAERDYHIFYQILSNKKPELLDMLLITNNPYDYAFISQGETTV  
ASIDDAEELMATDNADFVGLGFTSEEKNSMYKLTGAIMHFGNMKFKLKQREEQAE PDGTEEADKS  
AYLMGLNSADLLKGLCHPRVKVGNEYVTKGQNVQQVIYATGALAKAVYERMFNWVTRINATLE  
TKQPRQYFIGVLDIAGFEIFDFNSFEQLCINFTNEKLQQFFNHMFVLEQEEYKKEGIEWTFID  
FGMDLQACIDLIEKPMGIMSILEEECMFPKATDMTFKAKLFDNHLGKSANFQKPRNIKGKPEAH  
FSLIHYAGIVDYNIIIGWLQKNKDPLNETVVGLYQKSSLKLLSTLFANYAGADAPIEKGKGKAKK  
GSSFQTVSALHRENLNKLMTNLRSTHPHFVRCIIPNETKSPGVMNDNPLVMHQLRCONGVLEGIRI  
CRKGFPNRILYGDFRQRYRILNPAAIPEGQFIDSRKGAEKLLSSLDIDHNQYKFGHTKVFVKAG  
LLGLLEEMRDERLSRIITRIQAQSRGVLARMEYKLLERDSSLVIQWNIRAFMGVKNWPWMKL  
YFKIKPLLKSAEREKEMASMKEEFTRLKEALEKSEARRKELEEKMVSLLOEKNDLQLOVQAEQD  
NLADAEERCQDLIKNKIQLEAKVKEMNERLEDEEEMNAELTAKKRKLEDECSELKRDIDDLELT  
LAKVEKEKHATENKVKNLTEEMAGLDEIIAKLTKEKKALQEAHQALDDLQAEEDKVNTLTAKK  
VKLEQQVDDLEGSLEQEKKVRMDLERAKRKLEGLKLTQESIMDLENDKQQLDERLKKKDFELN  
ALNARIEDEQALGSQLOKKLKELQARIEELEELEEAEERTARAKVEKLRS DLSRELEEISERLEE  
AGGATSVQIEMNKKREAEFQKMRRDLEEATLQHEATAAALRKKHADSV AELGEQIDNLQRVKQK  
LEKEKSEFKLELDDVTSNMEQIIKAKANLEKMCRTLEDQMNEHRSKAEETQRSVNDLTSQRAKL  
QTENGELSRQLDEKEALISQLTRGKLTYYTQQLEDLKRQLEEEVKAKNALAHALQSARHDCDLLR  
EQYEEETEAKAELQRVLSKANSEVAQWRTKYETDAIQRTEELEEA KKKLAQRLQEAEEAVEAVN  
AKCSSLEKTKHRLQNEIEDLMVDVERSNAAAAALDKKQRNFDKILA EWKQKYEESQSELESSQK  
EARSLSSTELFKLNAYEESLEHLETFKRENKNLQEEISDLTEQLGSSGKTIHELEKVRKQLEAE  
KMELQSALEEA EASLEHEEGKILRAQLEFNQIKAEIERKLAEKDEEMEQAKRNHLRVVDSLQTS  
LDAETRSRNEALRVKKKMEGDLNEMEIQLSHANRMAAEAQKQVKS LQSLKDTQIQLD DAVRAN  
DDLKENIAIVERNNLLQAELEELRAVVEQTERSRLAEQELIETSERVQLLHSQNTSLINQKK  
KMDADLSQLQTEVEEAVQECRNAEEKAKKAITDAAMMAEELKKEQD TSAHLERMKKNMEQTIKD  
LQHRLDEAEQIALKGGKKQLQKLEARVRELENELEAEQKRNAESVKGMRKSE RRIKELTYQTEE  
DRKNLLRLQDLVDKQLKVKAYKRQAEAEQANTNLSKFRKVQHELDEAEERADIAESQVNKL  
RAKSRDIGTKGLNEE

Q91973\_C\_coturnix\_Slow\_ -----ALLGAAAPFLRAPEGPH---  
SAPPGDTRGLCFVPHQPQLEFVRARITARAGNGVTVTTETGETLTVPEADVHPQNPPKFDRIEDM  
AMLTFLHEPAVLYNLKERYASWMIYTYSGLFCVTVNPKWLPVYNAEVVAAYRGKKRTEVPPHI  
FSISDNAYQNMLTDRENQSILITGESGAGKTVNTRKVIQYFASIAAIGDR-  
KKEVANSSGTLEDQIIQANPALEAFGNAKTVRNDNSSRFGKFIRIHFHFGATGKGLASADIETYLL  
KSRVIFQLKAERNYHIFYQILSNKKPELLEMLLITNPNPYDYSYVSQGEVTVASIDSEELLATD  
SAFDVLGFTAEEKAGVYKLTGAIMHFGNMKFKQKQREEQAEPDGTEDADKSAYLMGLNSADLLK  
GLCHPRVKVGNEYVTKGQSVQVYYSIGALAKAVYEKMFNWMVVRINNSLETQPRQYFIGVLD  
IAGFEIFDFNSFEQLCINFTEKLLQFFNHMFVLEQEEYKKEGIEWEFIDFGMDLQACIDLIE  
KPMGIMSILEEECMFPKASDMTFKAKLFDNHLGKSANFGKPRNVKKGSEAHFSLIHYAGTVDYN  
IIGWLEKNKDPLNETVVGLYQKSALKLLASLFSNYAGADGDSGKKGAKKKGSSFQTVSALHRE  
NLNKLMANLKTTHPHFVRCLIPNERKEPGVMDNSLVMHQLRCNGVLEGIRICRKGFPNRIYGD  
FRQRYRILNPTAIEGQFIDSRKGAEKLLGSLDIDHNQYKFGHTKVFFKAGLLGLLEEMRDERL  
SLIITRIQAQARGQLMREFFKILERRDALLVIQWNI RAFMGVKNWPWMKLYFKIKPLLKSAET  
EKEMQTMKEEFGHLKEALEKSEARRKELEEKMVSMLOEKNDLQQLVQAEQDNLADAEERCDQLI  
KNKIQLEAKVKEMTERLEEEEMNAELTAKKRKLEDECSELKKDIDDLELSLAKVEKEKHATEN  
KVKNLTEEMAGLDENITKLTKEKKTLOESHQOALDDLQAEEDKVNTLAKAKVKLEQQADDLESS  
LQOEkKIRMDLERAKRKLEGDLKLAQESVMDLENDKQOLEERLKKKDFELNTLNARIEDEQAIA  
AQLQKKLKELOARIEELEELEAERTGRAKVEKLRSELLQEELEETSERLEEAGGATSVQLELNK  
KREAEFQKLRRDLEEATLQHEATAAALRKKHADSVAEELSEQLDNMQRVKQKLEKEKSELKLELD  
DVSSNMEQLIKAKANLEKMCSTEDQMNEHRNKLEESQRTVTDLSTQRAKLQ TENSELSRQLEE  
KEAFINQLMRGKLYTQOLEDLKRQLEEEAKAKNALAHALQSAQHDCDLLREQYEEEMEAKAEL  
QRALSKANSEVAQWRTKYETDAIQRTEELEEAKKKLAQRLQEAEEAVEAVNAKCSSLEKTKHRL  
QNEIEDLMADVERSNAAAAALDKKQRNFDKILSEWKQKFEESQTELEASQKEARSLSTELFKLK  
NAYEESLEHLETFKRENKNLQEEISDLTEQLGASQKSIHELEKVRKQLDAEKLELQAALEEAEA  
SLEHEEGKILRAQLEFNQVKAERYERKLAEKDEEMEQSKRNHLRVVDSLQTSLDAETRSRNEALR  
LKKKMEGDLNEMEIQLSHANRTAAEAQKQVKALQGYLKD TQLQLDDAVRANEDLKENIAIVER  
NNLLQSELEELRAMVEQSERARKLAEQELTEASERVQLLHSQNTSLINQKKMEADISQLQTEV  
EEAIQECRNAEEKAKKAITDAAMMAEELKKEQDTSAHLERMKNMEQTVKDLQLRLDEAEQLAL  
KGGKKQLQKLEARVRELENELEAEQKHNAESIKGLRKSERRVKELSYQTEEDRKNMVRLQDLVD  
KLQLKVKAYKRQAEAEAEQANSNLAKFRKAQHELDEAEERADIAESQVNKLRRSRDISNKKGL  
NE

Q5EC16\_X\_laevis\_Cardiac  
MGDAMMADFGAAAPFLRKS DKERLEAQTRIFDIKTEVFVPDTIQEFVKAKITSRDGGKVTAETA  
DGKTVTVKDVVDVHQQNPPKFDKIEDMAMLTFLHEPAVLYNLKERYAAWMIYTYSGLFCVTVNPK  
WLPVYNSEVVNAYRGKKRSEAPPHIFSIISDNAYQYMLTDRENQSILITGESGAGKTVNTRKVI  
QYFASIASVG--GKRDSK--  
GTLEDQIIQANPALEAFGNAKTVRNDNSSRFGKFIRIHFHFGASGKGLASADIETYLLKSRVIFQL  
KSERNYHIFYQILSNKKPELLDMMLVTNPNPYDYSYISQGEVTVASIDDADELMATDSAFDVLGF  
TAEKVG VYKLTGAIMHSGNMRFKQKQREEQAEPDGTTEEADKAAYLMGLNSADLLKGLCHPRVK  
VGNEYVTKGQNVQVYYSIGALGKSVYEKMFNWMVVRINSTLETQPRQYFIGVLDIAGFEIFD  
FNSFEQLCINFTEKLLQFFNHMFVLEQEEYKKEGIEWEFIDFGMDLQACIDLIEKPMGIMSILE  
EEECMFPKASDMTFKAKLYDNHLGKSNNFQKPRNLKKGPEAHFALVHYAGTVDYNISGWLEKN  
KDPLNETVVGLYQKSSSLKLLANLFSNYAAADDTGGKGGKGGKGGSSFQTVSALHRENLNKLMTN  
LRTHPHFVRCLIPNERKAPGEMDNPLVMHQLRCNGVLEGIRICRKGFPNRIYGD FRQRYRIL  
NPAAIPEGQFIDSRKGEKLLGSIDIDHTQYKFGHTKVFFKAGLLGLLEEMRDERLSRIITRIQ  
AQSRVLLMRREFKILERRDALLVIQWNI RAFMGVKNWPWMKLYFKIKPLLKTAETEKEMANMK

EEFHRLKEALEKSETRRKELEEKMVSLLOEKNDLQLOVQAEQDNLNDAEERCEQLIKNKIQLEA  
KLKEQTERLDDEEMNAELTAKKRKLEDECSELKKDIDDLELTLAKVEKEKHATENKVKNLTEE  
MAGLDDI IAKLTKEKKALQEAHQOTLDDLQAEEDKVNSLTKAKAKLEQQVDDLEGSLEQEKKLR  
MDMERAKRKLEGLDLKLTQENVMDLENDKQOLEEKTKKKEFEISLLNSKIEDEQIMGMQQQKKLK  
EHQARIEELEELEAERTARAKVEKLRSDLSRELEEISERLEEAGGATSVQMELNKKREAEFLK  
LKRDLLEESTLQSEATAATLRKKHADSVAELSEQIDNLQRVKQKLEKEKSEFKLELDDVASNMEQ  
VVKSKVNLEKLCRTLEDQMNEHRTKFEVQRTLNLDLSSQKAKLQTENGELTRRLDEKEALVSQM  
TRGKQTYSQOLEDLKRQLEEEESKAKNALAHGLQ SARHDCDLLREQYEEEQEAKAELQRVLSKAN  
AEVAQWRTRYETDAIQRTEELEEAKKKLAQRLQEAEEAVEAVNAKCSSLEKTKHRLQNEIEDLM  
VDLERSNAAAAALDKKQRNFDKILSEWKQKFEESQTELESSLKESRSLSTELFKLKNAYEESLE  
HLETFKRENKNLQEEISDLTEQLGEGGKSIHELEKIRKQLEQEKMELQTALEEAASLEHEEGK  
ILRAQLEFNQLKSEIDRKIAEKDEEMEQVKNRNQRLVDALQTQLEAEIRSRNEALRVKKMEGD  
LNEMEIQLSQANRSAAEAHKHLKAAHGSLKDIQIQLDLDTMRANDDLKENS AIVERRNMLLQAE  
EELRSILEQTERSRLAEQELIETSERVQLLHSQNTSLINQKKKTETDLAQLQTEVEEAVQECR  
NAEEKAKKAITDAAMMAEELKKEQDTS AHLERMKKNMEQTIKDLQORLDEAEQIAMKGGKKQLQ  
KLEGRVRELDNELEAEQKRNAESIKNMRKYERRIKELTYQTDDEKKNMARLQDLVDKQLKVKVA  
YKRQAEAEAEQANSNLSKFRKVQHELDEAEERADIAESQVNKIRAKTRDVGKKTLEH

Q910C5\_G\_gallus\_Chick\_a

-----ALLGAAAPFLRAPEGPR---

PTPAGDTRGLCFVPHPOLEFIRARVTARAGNGVTVTTEMGETLTVPEADVHPQNPPKFDRIEDM  
AMLTFLHEPAVLYNLKERYASWMIYTYSGLFCVTVNPKWLPVYNAEVVAAYRGKKRTEVPPHI  
FSISDNAYQNMLTDRENQSILITGESGAGKTVNTRKVIQYFASIAAIGHR-

KKEVANS SGTLEDQIIQANPALEAFGNAKTVRNDNSSRFGKFIRIHFGATGKLASADIETYLL  
KSRVIFQLKAERNYHIFYQILSNKKPELLEMLLITNNPYDYSYVSQGEVTVASIDDSEELLATD  
SAFDVLGFTAEEKAGVYKLTGAIMHFGNMKFKQKQREEQAE PDGTEDCDKSAYLMGLNSADLLK  
GLCHPRVKVGN EYVTKGQSVQVYYSIGALAKAVYEKMFNWMVVRINNSLETQPRQYFIGVLD  
IAGFEIFDFNSFEQLCINFTNEKLQQFFNHMFVLEQEEYKKEGIEWEFIDFGMDLQACIDLIE  
KPMGIMSILEEECMFPKASDMTFKAKLFDNHLGKSANFGKPRNVKGKSEAHFSLIHYAGTVDYN  
IIGWLEKNKDPLNETVVGLYQKSALKLLASLFSNYAGADGDGGKKGAKKKGSSFQTVSALHRE  
NLNKL MANLKTTHPHFVRCLIPNERKEPGVMDNPLVMHQLRCNGVLEGIRICRKGFPNRILYGD  
FRQRYRIPNPTAIEGQFIDSRKGAEKLLGSLDIDHNQYKFGHTKVFVKAGLLGLEEMRDERL  
SLIITRIQAQARGQLM RIEFKKILERRDALLVIQWNIRAFMGVKNWPWMKLYFKIKPLLKSAET  
EKEMQTMKEEFGHLKEALEKSAARRKELEEKMVSMLOEKNDLQLOVQAEQDNLADAEERCDQLI  
KNKIQLEAKVKEMTERLEEEEMNAELAAKKRLEDECSELKKDIDDLELSLAKVEKEKHATEN  
KVKNLTEEMAGLDENITKLTKEKKILOESHQOALDDLQAEEDKVNTLAKAKGKLEQQVDDLESS  
LEQEKKIRMDLERAKRKLEGLKLAQESIMDLENDKQOLEERLKKKDFELNTLNARIEDEQAIS  
AQLQKKLKEQLQARIEELEELEAERTGRAKVEKLRSELLQEELETSERLEEAGGATSVQLELNK  
KREAEFQKLRRDLEEATLQHEATAATLRKKHADSVAELSEQLDNLQRVKQKLEKEKSELKLELD  
DVNSNTEQLIKAKTNLEKMCRTTEDQMNEHRSKLEEAQRTVTDLSTQRAKLQ TENSELSRQLEE  
KEAFINQLTRGKLTYTQOLEDLKRQLEEEAKAKNALAHALQSAQHDCDLLREQYEEEMEAKAEL  
QRALSKANSEVAQWRTRYETDAIQRTEELEEAKKKLAQRLQEAEEAVEAVNAKCSSLEKTKHRL  
QNEIEDLMADVERSNAAAAALDKKQRNFDKILSEWKQKFEESQTELEASQKEARSLSSTELFKL  
NAYEESLEHLETFKRENKNLQEEIIDLTEQLGASQKSIHELEKVRKQLDAEKLELQAALEEA  
SLEHEEGKILRAQLEFNQVKADYERKLAEKDEEIEQSKRNHLRVVDSLQTS LDAETR SRNEALR  
LKKKMEGDLNEMEIQLSHANRTAAEAQKQVKALQGYLKDTQLQLDDVVRANEDLKENIAIVER  
NNLLQSELEELRAMVEQSERARKLAEQELIEASERVQLLHSQNTSLINQKKKMEADISQLQTEV  
EEAIQECR NAEEKAKKAITDAAMMAEELKKEQDTS AHLERMKKNMEQTVKDLQRLRDEAEQLAL  
KGGKKQLQKLEVRVRELENELEAEQKRNAESIKGLRKSERRVKELSYQTEEDRKNMVRLQDLVD



KLQLKVKAYKRQAEAEAEQANSNLAKFRKVQHELDEAEERADMAESQVNKLRARSRDIGAKKGL  
NE

UPI00015A4B13\_Danio\_reri

MGDALMEEFGAAAPYLRKSDRERLEAQTRPFDMKKECFVPDTDEEYVKGSII SRDGDKVTCE  
TGKGTVTVKECDVHPQNPFFDKIEDMAMFTFLHEPAVLFNLKERYAAWMIYTYSGLFCVTVN  
PYKWLVPVYNQEVVLAYRGGKRSEAPPHIFSI SDNAYQYMLSDRENQSILITGESGAGKT  
VNTKRVI QYFASIAAST---KKE-

TTEKGTLEDQIIQCNPALEAFGNAKTIRNDNSSRFGKFIRIHFAANGKLASADIETYLL  
EKSRVTFQLKAERDYHIFYQILSQQKPELLEMLLITANPYDYAFISQGETQVASINDADE  
LMATDEAFDVLGFTQEEKNSIYKLI GAIMHYGNMKFKQKQREEQAEADGTEDADKSAY  
LMGLNSADLLKALCHPRVKVGNWVTKGQNVQVYAVGALS KSVYEKMFLWMVVRINQSLD  
TRQPRQYFIGVLDIAGFEIFDFNTFEQLCINF TNEKLQQFFNHMMFVLEQEEYKKEGIE  
WTFIDFGMDLQACIDLIEKPMGIMSILEEECMFPKASDATFKAKLYDNHLGKSNNFQK  
PRIVKGKPEAHFSLVHYAGTVDYNINNWLVKNKDPLNETVVGLYQKSTMKLLSNLFA  
NYTGADGGGKTKKKKSSSQFQTVSALHRENLNK LMTNLRSTH PHFVRCLIPNETKTP  
GAMENPLVMHQLRCNGVLEGIRICRKGFPNRILYGD FQR YRILNPAAPDGQFIDSRK  
GAEKLLGSLDIDHNQYKFGHTKVFFKAGLLGTLEEMRDDRLALII TNIQARSRGLLS  
RIEFQKLVDRRDALLVIQWNVRAFMGVKNWPWMKLYFKIKPLLSAEAEKEM ANMKEE  
FLKLKEAYAKSEARRKELEEKMVSLLEKNDLQAVQAEQDNLCDAEERCEGLIKNKI  
QLEAKAKELTERLEDEEEMNAELTAKKRKLEDECSELKDDIDLELTLAKVEKEKHATEN  
KVKNLTEEMAALDEI IARLTKEKKALQEAHQQTLDLQSEEDKVNTLTAKAKLEQQVDD  
LEGSLEQEKKLRMDLERAKRKLEGLKLTQESVMDLENDKQQLEERLKKKDFEISQLTS  
RIEDEQAMATQLQKKLQELQARIEELEEELEAERAARAKVEKQRADLSRELEEISER  
LEEAGGATAAQIEMNKKREAEFQKLRRDLEEATLQHEATASTRKKHADSVSDLGEQIDN  
LQVVKQKLEKEKSELRLLEDDVVS NMEQLAKAKANLEKMCRTELDQMSEYRKYEEG  
QRSINDFTMQKARLQTEGELTRQLEEKDSLVSQ LTRSKQSYTQQIEDLKRQLEEEV  
KAKNALAHAVQSARHSDLLREQYEEEQEAKAELQ RSLSKANSEVAQWRTKYETDAI  
QRTEELEDAKKKLAQRLQDAEEAVEAVNAKCSSLEKTKHRLQNEIEDLMVDVERS  
NAAAAALDKKQRNFDKVLAEWKQKYEESQSELESSQKEARSLSTELFKLKNSE  
ESLDHLESMKRENKNLQEEIADLTEQIGESGKNIHELEKMRKQLEQEKAEQAALEEA  
EGSLEHEEGKILRAQLEFSQIKADIERKLEKDEEMEQAKRNQQRMIDTLQSSLESE  
TRSRNEALRLKKKMEGDLNEMEIQLSQANRQASEAQKQLKSLQGHKDAQMQLDDAL  
RANDDLKENIAIVERNNLLQAEDELRLSVEQTERGRKLAEQELMDVSERVQLLH  
SQNTSLLNQKKKLEGDNTQLQTEVEEAVQECRNAAEKAKKAITDAAMMAEELKKE  
QDTSAHLERMKNMEQTIKDLQHRLEAEQIAMKGGKQVQKLEARVRELENEVELEQK  
KASESVKIRKYERRIKELTYQTEEDRKNLARLQDLVDKQLQKVKS YKRAAEAEAE  
QANSNLTKFRKLQHELDEAEERADIAESQVNKLRAKSRDSGSKKGQ-E

UPI00015A67FC\_Danio\_reri

MGDAEMSVFGAAAPYLRKSEKERLEAQTKAFDLKKECFVPDAIEEFVKATVVSREGD  
KVTVETQGGKTVTVKEADV LQQNPFFDKIEDMAMLTFLHEPAVLFNLKERYAAWMI  
YTYSGLFCVTVNPKWLVPVYNQEVV IAYRGGKRTEAPPHIYSI SDNAYQYMLADREN  
QSILITGESGAGKT VNTKRVI QYFASIAASG---

KKDQDKNKGTLEDQIIQANPALEAFGNAKTIRNDNSSRFGKFIRIHFDTRGKLASADI  
ETYLLKSRVTFQLKAERDYHIFYQILSNKKPEILEMLLVTSNPYDYAFISQGETTVPSI  
DDSDELMATD SAFDILGFTQEEKNSVYKLTGAIMHYGNMKFKQKQREEQAEADGTED  
ADKSAYLMGLNSADLIKGLCHPRVKVGNWVTKGQNVQVNYAIGALS KAVYEKMFLWM  
VVRINQSLETQPRQYFIGVLDIAGFEIFDFNTFEQLCINF TNEKLQQFFNHMMFVLE  
QEEYKKEGIEWEFIDFGMDLQACIDLIEKPMGIMSILEEECMFPKASDATFKAKLY  
DNHLGKSNNFQKPRLVKGKPEAHFALVHYAGTVDYNINNWLVKNKDPLNETVVGLY  
QKSSKLLSNLFA NYAGADTGDDGKKEKKKSSSQFQTVSALHRENLNK LMTNLRSTH  
PHFVRCLIPNETKTPGAMENPLVMHQLRCNGVLEGIRICRKGFPNRILYGD

FKQRYRILNPAAIPEGQFIDSKKGAEKLLGSLDIDHQQYRFGHTKVFFKAGLLGQLEEMRDERL  
SKIITGIQAKSRGLLSRAEYIKMVERRDALLVIQWNVRAFMAVKNWPWMKLLFFKIKPLLRSAEA  
EKEMANMKEEFLKLKEAYAKSEARRKELEEKMVTLLOEKNDLQLOVQAEQDNLCDAEERCEGLI  
KNKIOMEAKAKELTERLEDEEEMNAELTAKKRKLEDECSELKKDIDDLELTLAKVEKEKHATEN  
KVKNLTEEMAALDDIIAKLTKEKKALQEAHQQTLDLQSEEDKVNTLTAKAVKLEQQVDDLEGS  
LEQEKKIRMDLERAKRKLEGDLKLTQESIMDLENDKQQLEEKLKKKDFEISQLNSKIDDEQSII  
IQLQKKLQELQARVEELEEELEAERAARAKVEKQRADLARELEEISERLEEAGGATAAQIEMNK  
KREAEFQKLRRDLEEATLQHEATAATLRKKQADSVAEELGEQIDNLQRVKQKLEKEKSELRLLELD  
DVASSMEHIVKSKTNMEKVNRTLEDQMNEYRNKCEEYQRSLNDFTTQKAKLQAEENDEFSRQLEE  
KESLVSQLTRGKNSFSQOLEDLKRQLDEEIKAKNALAHALQSARHDTDLLREQYEEEEQEAKAEL  
QRSMSKANTEVAQWRTKYETDAIQRTEELEEAKKKLAQRLQEAEEAVEAVNAKCSSLEKTKHRL  
QNEIEDLMVDVERSNTAAASLDKKQRHFDKIISEWKQKYEESQCELESSQKEARSLSTELFKLK  
NSYEESMDHLETMKRENKILQEEISDLTEQLGEGGKTIHELEKVRKQLEQEKAIEIQAALEEAEAG  
SLEHEEGKILRTQLEFNQIKADIERKLSEKDEEMEQVKNRQORTIDTLQSALESETRSRNEALR  
IKKKMEGDLNEMEIQLSQANRQAAEAQKQLKSVQAHKDSQLQLDDSLRSNDDLKENTAIVERR  
NALLQAELEELRAVLEQTERGRKLAEQELLDVTERVQQLHSQNTSLINQKKKLETDLQFQTEV  
EEAVQECRNAEEKAKKAITDAAMMAEELKKEQDTSALHERMKKNMEQTIKDLQHRLEDAEQIAM  
KGGKKQVQKLEARVRELECEVEAEQKRSSSESVKGIKRYERRIKELTYQTEEDRKNIARLQDLVD  
KLQLKVKAYKRAAESEEQANVHLGKFRKLQHELDEAEERADIAESQVNKLRAKSRDVGPK---

--  
B6IDE0\_Danio\_rerio\_Slow\_  
MGDAVMAEFGAAAPYLRKSDRERLEAQTRPFDMKKECFVPADEEYLKATVISRDGDKATCETS  
KGTTVTVKECDVHPQNPPKFDKIEDMAMFTFLHEPAVLFNLKERYAAWMIYTYSGLFCVTVNPY  
KWLPVYNQEVVVAYRGKKRSEAPPHIFSISDNAYQYMLSDRENQSILITGESGAGKTVNTKRVI  
QYFASIAAST---KKE-  
TTEKGTLEDQIIQCNPALEAFGNAKTIRNDNSSRFGKFIRIHFAASGKLASADIETYLLEKSRV  
TFQLKAERDYHIFYQILSQKKPELLEMLLITANPYDYAFISQGETQVASINDADELMATDEAFD  
VLGFTQEEKNSIYKLTGAIMHYGNMKFKQKQREEQAEADGTEDADKSAYLMGLNSADLIKALCH  
PRVKVGNVWTKGQNVQVYAYAIGALSksVYEKMFLWMVVRINQSLDTKQPRQYFIGVLDIAGF  
EIFDFNTFEQLCINFTNEKLQOFFNHHMFVLEQEEYKKEGIEWTFIDFGMDLQACIDLIEKPMG  
IMSILEEECMFPKASDATFKAKLYDNHLGKSNFQKPRIVKKGKPEAHFSLVHYAGTVDYNINNW  
LVKNKDPNETVVGLYQKSTMKMLSILFANYAGAEGGGGKTKKKKKGSSFQTVSALHRENLNK  
LMTNLRSTHPHFVRCIIPNETKTPGAMENPLVMHQLRCNGVLEGIRICRKGFPNRILYGDFKQR  
YRILNPAAIPDGQFIDSRKGAEKLLGSLDIDHNQYKFGHTKVFFKAGLLGTLEEMRDDRLLALII  
TNIQARARGLLSRVEFQKIVDRRDALLVIQWNVRAFMGVKNWPWMKLYFKIKPLLRSAEAEKEM  
ANMKEEFLKLKEAYAKSEARRKELEEKMVSLLOEKNDLQAVQTEQDNLCDAEERCEGLIKNKI  
QLEAKAKELTERLEDEEEMNAELTAKKRKLEDECSELKKDIDDLELTLAKVEKEKHATENKVKN  
LTEEMAALDEIIAKLTKEKKALQEAHQQTLDLQSEEDKVNTLTAKAKLEQQVDDLEGSLEQE  
KKLRMDLERAKRKLEGDLKLTQESVMDLENDKQQLEERLKKKDFEISQLSSRIEDEQAMAAQLQ  
KKLQELQARIEELEEELEAERAARAKVEKQRADLSRELEEISERLEEAGGATAAQIEMNKKREA  
EFQKLRRDLEEATLQHEATASTLRKKHADSVDLGEQIDNLQRVKQKLEKEKSELRLLEDDVVS  
NMEQIAKAKANLEKMCRTELEDQMSEYRTKYEEGQRSINDFTMKKAKLQTEGELSRQLEEKDSL  
VSQLTRGKQSYTQQIEDLKRQLEEEVAKNALAHAVQSARHDAELLREQYEEEEQEAKAELQRS  
SKANSEVAQWRTKYETDAIQRTEELEDAKKKLAQRLQDAEEAVEAVNAKCSSLEKTKHRLQNEI  
EDLMVDVERSNAAAAALDKKQRNFDKVLAEWKQKYEESQSELESSQKEARSLSTELFKLKNSE  
ESLDHLESMKRENKNLQEEIADLTEQIGESGKNIHELEKMRKQLEQEKAIEIQTALEEAEGSLEH  
EEGKILRAQLEFNQVKADIERKLSEKDEEMEQAQRNQQRMIDTLQSSLESETRSRNEALRLKKK

MEGDLNEMEIQLSQANRQASEAQKQLKSLHGHLKDAQLQLDDALRGNDLKENIAIVERNNLL  
QAELDELRLSVEQTERGRKLAEQELMDVSERVQLLHSQNTSLLNQQKKKLEGDNTQLQTEVEEAV  
QECRNAEEKAKKAITDAAMMAEELKKEQDTSAHLERMKKNMEQTIKDLQHRLDEAEQIAMKGGK  
KQVQKLEARVRELESEVEMEQRKASDSVKGVRKYERRIKELTYQTEEDRKNLARLQDLVDKLQL  
KVKS YKRTAEEAEEQANSNLGKFRKLQHELDEAEERADIAESQVNKLRAKSRDTGSKKGHDE

UPI00016278FC\_Danio\_reri

MGDAEMSVFGAAAPYLRKSEKERLEAQTKAFDLKKECFVPDAIEEFVKATVVSREGDKVTVETQ  
GGKTVTVKEADV LQQNPPKFDKIEDMAMLTFLHEPAVLFNLKERYAAWMIYTYSGLFCVTVNPY  
KWLPVYNQEVVIA YRGKERT EAPPHIYSISDNAYQYMLADRENQSILITGESGAGKTVNTKRVI  
QYFASVAASG---

KKDQDKNKGTLEDQIIQANPALEAFGNAKTIRNDNSSRFGKFIRIHFDTRGKLASADIETYLL  
KSRVTFQLKAERDYHIFYQILSNKKPEILEMLLVTSNPDYAFISQGETTVPSIDDSDELMATD  
SAFDILGFTQEEKNSVYKLTGAIMHYGNMKFKQKQREEQAEADGTEDADKSAYLMGLNSADLIK  
GLCHPRVKVGNWVTKGQNVQVNYAIGALSKAVYEKMF LWMVVRINQSLETKQPRQYFIGVLD  
IAGFEIFDFNTFEQLCINF TNEKLQQFFNHMFVLEQEEYKKEGIEWEFIDFGMDLQACIDLIE  
KPMGIMSILEEECMFPKASDATFKAKLYDNHLGKSNNFQKPRLVKGGKPEAHFALVHYAGTVDYN  
INNWLVKNE DPLNETVVGLYQKSS LKLLSNLFANYAGADTGDGGKKEK KKKGSSFQTVSALHRE  
NLNKLMTNLRSTH PHFVRCLIPNETKTPGAMENPLVMHQLRCNGVLEGI RIRICRKGFPNRILYGD  
FKQRYRILNPAAIPEGQFIDSKKGAEKLLGSLDIDHQYRFGHTKVFFKAGLLGQLEEMRDERL  
SKIITGIQAKSRGLLSRAEYIKMVERRDALLVIQWNVRAFMAVKNWPWMKLFKIKPLLSRAEA  
EKEMANMKEEFLKLKEAYAKSEARRKELEEKMTLLQEKNDLQ LQVQAEQDNLCDAEERCEGLI  
KNKIQMEAKAKELTERLEDEEEMNAELTAKKRKLEDECESELKKDIDDLELTLAKVEKEKHATEN  
KVKNLTEEMAALDDIIAKLTKEKKALQEAHQQTLDLQSEEDKVNTLTAKVKLEQQVDDLEGS  
LEQEKKIRMDLERAKRKLEGLKLTQESIMDLENDKQQLLEEK LKKKDFEISQLNSKIDDEQSI  
IQLQKKLQELQARVEELEEELEAERAARAKVEKPRADLARELEEISERLEEAGGATAAQIEMNK  
KREAEFQKLRRDLEEATLQHEATAATLRKKQADSVAE LGEQIDNLQRVKQKLEKEKSELRL  
DVASSMEHIVKSKTNMEKVNRTLEDQMNEYRNKCEEYQRSLNDFTTQAKLQAE NDEF SRQLEE  
KESLVSQ LTRGKNSFSQOLEDLKRQLDEEIKAKNALAHALQSARHDTDLLREQYEEEQEAKAEL  
QRSMSKANTEVAQWRTKYETDAIQRTEELEEA KKKLAQRLQEAEEAVEAVNAKSSLEKTKHRL  
QNEIEDLMVDVERSNTAAASLDKKQRHFDKIISEWKQKYEESQCELESSQKEARSLSTELFKLK  
NSYEESMDHLETMKRENKILQEEISDLTEQLGEGGKTIHELEKVRKQLEQEKA EIQAAL EEAEG  
SLEHEEGKILRTQLEFNQIKADIERKLSEKDEEME QVKNRQORTIDTLQSALESETHSRNEALR  
IKKKMEGDLNEMEIQLSQANRQAAEAQKQLKSVQAHLKDSQLQLDDSLRSNDDLKENTAI  
VERNNALLQAELEELRAVLEQTERGRKLAEQELLDVTERVQLLHSQNTSLINQKKKLETDL  
SQFQTEVEEAVQECRNAEEKAKKAITDAAMMAEELKKEQDTSAHLERMKKNMEQTIKDLQHRL  
DEAEQIAMKGGKKQVQKLEARVRELECEVEAEQKRSSSVK GIRKYERRIKELTYQTEEDRKN  
IARLQDLVDKLQLKVKAYKRAAEESEEQANVHLGKFRKLQHELDEAEERADIAESQVNKLRAK  
SRDVGPK---

--

B6IDE1\_Danio\_rerio\_Slow\_

MGDAVMAEFGPAAPFLRKSDKERLEAQTRPFDMKKECFVPDPEVEYVKASVTSRDGDKVTVETE  
FGKTVTVKEVDCHPQNPPKFDKIEDMAMFTFLHEPAVLFNLKERYAAWMIYTYSGLFCVTVNPY  
KWLPVYNQEVVVAYRGKKRTEAPPHIFSI SDNAYQYMLS DRENQSVLITGESGAGKTVNTKRVI  
QYFASIAAAG---

KKDPSQEKGTLEDQIIQCNPALEAFGNAKTIRNDNSSRFGKFIRIHFGVSGKLSSADIETYLL  
KSRVTYQLKAERDYHIFYQILSQRKPELLEMLLITNPNPDYSYISQGETQVASIDDRDELIATD  
EAFDVLGFTQEEKNSIYKLTGAIMHYGNMKFKQKQREEQAEADGTEDADKVAYLMGLNSADLIK  
GLCHPRVKVGNWVTKGQNVQVYYSIGALAKSVYEKMF LWMVVRINQSLDTKQPRQYFIGVLD

IAGFEIFDFNTFEQLCINFTNEKLQQFFNHHMFVLEQEEYKKEGIEWEFIDFGMDLQACIELIE  
KPMGIMSILEEECMFPKASDATFKAKLYDNHLGKNPNFQKPRIVKGRPEAHFALVHYAGTVDYN  
ISNWLVKNKDPLNETVVGLFQKSTLKLGLTLFANYAGAEGGKGGK-  
GAKKKGSSFQTVSALHRENLNKLMTNLRSTHPPHVRCLIPNETKTPGAMENPLVMHQLRCNGVL  
EGIRICRKGFPNRILYGDFFKQRYRILNPSAIEGQFIDNKKGAEKLLGSLDIDHNQYKLGHTKV  
FFKAGLLGTLEEMRDDLALIIITGIQARARGILSRIEFQKIVERRDSLLVIQWNVRAFMGVKNW  
PWMKLYFKIKPLLKTAETEKEMANMKEEFTKLKEAYAKSEARKKELEEKMVSLLQEKNDLQ LAV  
QSEQDNLADAEERCEGLIKSKIQFEAKVKELTERLEDEEEMNAELVAKKRKLEDECESELKKDID  
DLELTLAKVEKEKHATENKVKNLTEEMAALDEIIAKLTKEKKALQEAHQQTLDLQSEEDKVNT  
LTKAKAKLEQQVDDLEGSLEQEKKIRMDLERAKRKLEGLKLTQENLMDLENDKQQMEERLKKK  
DFEISQLNSKIEDEQALEAQLQKCLKELQARIEELEELEAERAARAKVEKQRADLSRELEEIS  
ERLEEAGGATAAQIEMNKKREAEFQKLRDLLEEATLQHEATASTLRKKHADSVSDLGEQIDNLQ  
RVKQKLEKEKSELRLLEDDVVSNMEQIVKAKANLEKMCRTLEDQMSEYRTKAEEGQRTINDFTM  
QKAKLQ TENGELSRQLEEKDSLVSQ LTRGKQSYTQQIEDLKRQLEEEVKAKNALAHAVQSARHD  
AELLREQYEEEQEAKAELQRSLSKANSEVAQWRTKYETDAIQRTTEELEEAKKKLAQRLQDAEEA  
VEAVNAKCSSLEKTKHRLQNEIEDLMVDVERSNAAAAALDKKQRNFDKVLAEWKQKYEESQTEL  
ESAQKESRSLSTELFKLNSYEESLDHLESMKRENKNLQEEISDLTEQLGESGKNIHELEKVRK  
QLEQEKEQEIQTALIEEAGSLEHEEGKILRAQLEFNQVKADIERKLEKDEEMEQAQRNQQRVVD  
TLQSSLESETRSRNEALRLKKKMEGDLNEMEIQLSQANRQASEAQKQLKGLHGHKDAQLQLDD  
ALRGNDLKENIAIVERRNNLLQAEDELRLSVEQTERGRKLAEQELMDVSEVQLLHSONTSL  
LNQKKKLEGDNTQLQTEVEEAVQECRNAEEKAKKAITDAAMMAEELKKEQDTSAHLERMKKNME  
QTIKDLQHRLEAEQIAMKGGKKQVQKLESRVRELESEVEMEQRKASDSVKGVRKYERRIKELT  
YQTEEDRKNLARLQDLVDKQLKVKVSYKRTAEAEQANSNLGKFRKLQHELDEAEERADIAES  
QVNLKRAKSRDSGSKKGADE

UPI000D9BB5C\_M\_\_mulatta

MTDAQMADFGAAAQ-----

-----  
-----  
GESGAGKTVNTKRVIQYFASIAAIGDRGKKDNANANGTLEDQIIQANPALEAFGNAKTVRNDNS  
SRFGKFIIRIHFGATGKLAFADIETYLLKSRVIFQLKAERNYHIFYQILSNKKPELLDMLLVTN  
NPYDYAFVSVQGEVSVASIDDSEELMATDSAFDVLGFTSEEKAGVYKLTGAIMHYGNMKFKQKQR  
EEQAEPDGTEDADKSAYLMGLNSADLLKGLCHPRVKVGNVYVTKGQSVQVYYSIGALAKAVYE  
KMFNWMVTRINATLETKQPRQYFIGVLDIAGFEIFDFNSFEQLCINFTNEKLQQFFNHHMFVLE  
QEEYKKEGIEWTFIDFGMDLQACIDLIEKPMGIMSILEEECMFPKATDMTFKAKLYDNHLGKSN  
NFQKPRNIKKGQEAHFSLIHYAGTVDYNILGWLEKNKDPLNETVVALYQKSSLKLMTLFSYA  
SADGESGKSKGGKGGSSSFQTVSALHRENLNKLMTNLRTHPHFVRCIIPNERKAPGVMNDPLV  
MHQLRCNGVLEGIIRICRKGFPNRILYGDFFRQRYRILNPAAIEGQFIDSRKGSEKLLSSLDIDH  
NQYKFGHTKVFFKAGLLGLLEEMRDERLSRIITRMQAQARGQLMRIEFKKIVERRDALLVIQWN  
IRAFMGVKNWPWMKLYFKIKPLLKSAETEKEMATMKEEFGRIKETLEKSEARRKELEEKMVSLL  
QEKNDLQ LQVQAEQDNLNDAEERCDQLIKNKIQLEAKVKEMNERLEDEEEMNAELTAKKRKLED  
ECLELKKDIDLELTLAKVEKEKHATENKVKNLTEEMAGLDEIIAKLTKEKKALQEAHQQALDD  
LQVEEDKVNLSKSKVKLEQQVDDLEGSLEQEKKVRMDLERAKRKLEGLKLTQESIMDLENDK  
LQLEEKLLKKEFDINQQNSKIEDEQALALQLQKCLKENQARIEELEELEAERTARAKVEKLSR  
DLSRELEEISERLEEAGGATSVQIEMNKKREAEFQKMRRDLLEEATLQHEATAAALRKKHADSV  
ELGEQIDNLQ RVKQKLEKEKSEFKLELDDVTSNMEQIIKAKANLEKVSRTLEDQANEYRMKLEE  
AQRSLNDFTTQRAKLQ TENGELARQLEEKALISQLTRGKLSYTQQMEDLKRQLEEEGKAKNAL  
AHALQSARHDCDLLREQYEEETEAKAELQRVLSKANSEVAQWRTKYETDAIQRTTEELEEAKKKL

AQRLQDAEEAVEAVNAKCSSLEKTKHRLQNEIEDLMVDVERSNAAAAALDKKQRNFDKILAEWK  
QKYEESQSELESSQKEARSLSTELFKLNAYEESLEHLETFKRENKNLQEEISDLTEQLGEGGK  
NVHELEKVRKQLEVEKLELQSALEEAASLEHEEGKILRAQLEFNQIKAEIERKLAEKDEEMEQ  
AKRNHQRVVDLSLQTSLDAETRSRNEALRVKKKMEGDLNEMEIQLSHANRMAVEAQKQVKSLSL  
LKDTQIQLDLDAVRANDDLKENIAIVERNNLLQAELEELRAVVEQTERSRLAEQELIETSERV  
QLLHSQNTSLINQKKKMESDLTQLOQSEVEEAVQECRNAEEKAKKAITDAAMMAEELKKEQDTSA  
HLERMKKNMEQTIKDLQHRLDEAEQIALKGGKKQLQKLEARVRELEGELEAEQKRNSSESVKGM  
KSERRIKELTYQTEEDKKNLLRLQDLVDKLQKLVKAYKRQAEAEQANTNLSKFRKVQHELDE  
AEERADIAESQVNLRAKSRDIGAK-----

Q2HX56\_C\_\_carpio\_Myosin\_

MSDAVMAEFGPAASFLRKSDEKERLEAQTRPFDMKKECFVPDPEVEYIKASITSRDGDKVTVDTE  
SGKTLTFKEADVHPQNPPKFDKIGDMAMFTFLHEPAVLFNLKERYAAWMIYTYSGLFCVTVNPNY  
KWLPVYDASVVKAYRGKKRTEAPPHIFSISDNAYQYMLSDRENQSVLITGESGAGKTVNTKRVI  
QYFASIAAVG---

KKDAASEKGTLEDQIIQANPALEAFGNAKTIRNDNSSRFGKFIRIHFGVSGKLASADIETYLL  
KSRVTYQLKAERDYHIFYQILSQQKPELLEMLLITNNPYDYAYISQGETQGGVHDDAEELIATD  
EAFDVLGFTAEEKAGIYKLTGAVMHYGNMKFKQKQREEQAEADGTEDADKVAAYLMGLNSADLIK  
GLCHPRVKVGNWVTKGQSVQVYYSIGALAKSVYEKMFLLWVVRINQSLDTKQPRQYFIGVLD  
IAGFEIFDFNTFEQLCINFTEKQQFFNHHMFVLEQEEYKKEGIEWEFIDFGMDLAACIELIE  
KPMGIMSILEEECMFPKASDATFKAKLYDNHLGKNPTFQKPRIVKGGKPEAHFSLVHYAGIVDYN  
ISNWLVKNKDPLNETVVGLFQKSTVKLLSFLFAGYSGADAKGGKG-

GGKKKGSSFQTVSALHRENLNKLMTNLRSTHPPHVRCLIPNETKTPGVMENPLVMHQLRCNGVL  
EGIRICRKGFPNRIYLGDFKQRYRILNPSAIEGQFIDNKKAAEKLLGSLDLDSQYKLGHTKV  
FFKAGLLGTLEELRDDRLLALITGIQARARGILSRIEFQKIVERRDSLLVIQWNVRAFMGVKNW  
PWMKLYFKIKPLLKSAETEKEMANMKEEFTKLKEAYAKSEARKKELEEKMVSLLQEKNDLQLAM  
QSEQDNLCDAEERCEGLIKSKIQLEAKVKELTERLEDEEEMNAELVAKKRKLEDECESELKDDID  
DLELTLAKVEKEKHATENKVKNLTEEMSALDEIIAKLTKEKKALQEAHQOTLDDLQSEEDKVNT  
LTKAKAKLEQQVDDLEGSLEQEKLRMDLERVVRKLEGLKLTQESIMDLENDKQQQLDEKLKKK  
DFEMSQNSKIEDEQALGAQLQKKLKELQARIEELEELEAERAARAKVEKQORADLSRELEEIS  
ERLEEAGGATAAQIEMNKKREAEFQKLRRDLEEATLQHEATAATLRKKHADSVADLGEQIDNLQ  
RVKQKLEKEKSELKLELDDVVSNMEQTVKSKSNLEKMCRTLEDQMSEYRTKAEEGQRTINDFTM  
QKAKLQTEGELSRQVEEKDSLVSQLTRGKQSYTQQIEDLKRQLEEEIKAKNALAHAVQSARHD  
SDLLREQYEEEQEAKAELQRSLSKANSEVAQWRTKYETDAIQRTTEELEDKAKKLAQRLQDAEEA  
VEAVNAKCSSLEKTKHRLQSEIEDLMVDVERSNAAAAALDKKQRNFDKVLAEWKQKYEESQSEL  
ESVQKESRSLSTELFKLKNSEYEVLDHLETMKRENKNLQEEISDLTEQLGESGKSIHELEKIRK  
QLEQEKAIEQTALAEAEAGSLEHEEGKILRAQLEFNQVKADIERKLTEKDEEMEQSKRNQORMVD  
TLQSSLESETRSRNEALRLKKKMEGDLNEMEIQLSQANRQASEAQKQLKGLHGHKDAQMQQLDD  
ALRGNDLKENIAIVDRNNLLQAELELRSMEVQTERGRKLAEQELLDVSEVQLLHAQNTSL  
LNQKKKLEGDNSQLQTEVEEAVQECRNAEEKAKKAITDAAMMAEELKKEQDTSAHLERMKKNME  
QTIKDLQHRLDEAEQIAMKGGKKQVQKLEARVRELENEVELEQRKASESVKGVKRYERRIKELT  
YQTEEDRKNLRLQDLVDKLQKLVKSYKRAAEAEQANANLGKFRKIQHELDEAEERADIAES  
QVNMKRAKSRDSGSKKHDE

B8JLS3\_Danio\_rerio\_Myosi

MGDALMAEFGKAAPFLRKSDEKERLEAQTRAFDIKTECFVVEKVEYVKGQIQNKDGGKVTVKTE  
DGRVTVTKDGDVHPQNPPKFDKIEDMAMLTFLHEPAVLFNLKERYTAWMIYTYSGLFCVTVNPNY  
KWLPVYDADVVAAYRGKKRTEAPPHIFSISDNAYQYMLTDRENQSVLITGESGAGKTVNTKRVI  
QYFASIAAAGSAGKKDSSK--

GTLEDQIIQANPALEAFGNAKTLRNDNSSRFGKFIRIHFGTSGKLSADIETYLLKSRVTFQL  
KSERNYHIFQIILSNEKPELLDMLLITNPNPYDYSYISQGEVTVSSINDNEELIATDKAFDVLGF  
TSEKMGVYKLTGAIMHYGNMFKQKQREEQAEPDGTEDADKAAYLMGLNSADLLKGLCHPRVK  
VGNEYVTKGQSVQVYYSIGALAKSVYKMFNWMVVRINQSLDTKQHRQYFIGVLDIAGFEIFD  
FNTFEQLCINFTNEKLQQFFNHMFVLEQEEYKKEGIDWEFIDFGMDLQSCIDLIEKPLGIMSI  
LEEECMFPKASDQTFKAKLYDNHLGKTNI FQKPRAVKKGAEAHFALSHYAGTVDYNIAGWLVKN  
KDPLNETVVGLYQKSSLKLLSLLFSSYAGSDGEKSGGKGAKKKGSSFQTVSALHRENLNKLMTN  
LKTTHPHFVRCLIPNESKIPGIMDNCLVMHQLRCNGVLEGIRICRKGFPNRILYGDFKQRYRIL  
NASAIPEGQFIENKKSAAEKLLGSLDIDHTQYKFGHTKVFVKAGLLGTLEEMRDDQLARILGTIQ  
AFARGLLMRVEYQKLVERRDALMVVQWNLRSFLGVKNWPWMKLFKIKPLLSAEESEKEMANMK  
DEFNKLKEALEKSDARRKELEEKMVSLLOEKNDLLLQVQSEQDTLTDAEERCEQLIKSKIQLEA  
KVKELSERIEDEEEINADLTAKRRKLEDECESELKDDIDLELTLAKVEKEKHATENKVKNITTE  
MASLDENIMKLTKEKKALQEAHQQTLDLQSEEDKVNTLTAKAVKLEQQVDDLEGSLEQEKKVR  
MDLERSKRKLEGDVCLTQENVMDLENDKQOLEDKLKKKDFEINQLNQRIEDEQMASVQLQKLLK  
ENQARIEELEEELDAERAARAKVEKQRSDISRELEDISERLEEAGGATSAQVELNKKRDAEFQK  
IRRDLEESTLQHEATTASLRKKHADSVAELGEQIDNLQRVKQKLEKEKVELKLELDDLASNMES  
IVKAKVNLEKMCRSLEDQMNEHRSKAEAAQRALNDVSTQKAKLLTENGELEGRQLEEKECLISQL  
TRGKTSYTOQLEDLRRQLEEEVKAKNALAHAVQSARHDCDLLREQFEEEQEAKAELQRALSKAN  
TEVATWRARYETDGIQRTEELEDAKKKLVQKLQEAEEAVEAVNAKCSSLEKTKHRLQNEIEDLM  
LDLERSNAASAALDKKQRSFDKVMAEWKQKYEESQCELEGAQKEARSSTELFKLKNSEETLD  
HLETIKRENKNLQEEISDLTDQVSEGRKSVHELEKLRKQLEQEKTELQSALEEADASVEHEEGK  
ILRAQLEFNQLKADFERKMSEKDEEMEQARRNYQRMIESLQASLEAETRSRNEALRVKKKMEGD  
LNEMEIQLSQANRQAADAQKQLKMOVQSCLETKETQLQMDDTLHSNDDLKENITLLERRNNLMQTEL  
EELRGILEQTERVRKLAEQELTDATERMQLLHSQNTGLINQKKKQESDLLQLQNELEELVQENR  
NAEEKAKKAITDAAMMAEELKKEQDTS AHLERMKNMEQTIKDLQHRLEDAEQVAMKGGKKQLQ  
KMEARIRELENELEDAEQKRGSESVKGVKRFERRIKELTYQTDEDRKNLARLQDLVDKLQKLVKS  
YKRSAAEEAEELANANTAKLRKLQHELEEAERADIAESQVKNLRAKTRDGAPG-----

UPI0000EB3EAF\_Canis\_lupu

-

SDQEMAI FGEAAPYLKSEKERIEAQNRPFDAKTSVFVAEPKESFVKGTVQSREGGKVTVKTEA  
GATLTVKEDQVFPMPNPKYDKIEDMAMMTHLHEPAVLYNLKERIYAAMIYTYSGLFCVTVNPNYK  
WLPVYNPEVVTA YRGKKRQEAPPHIFSI SDNAYQFMLTDRENQSILITGESGAGKTVNTRVIQ  
YFATIAVTGEKKKEEATSG-

GTLEDQII SANPLLEAFGNAKTVRNDNSSRFGKFIRIHFGTTGKLASADIETYLLKSRVTFQL  
KAERSYHIFYQITSNKKPELIEMLLITNPNPYDYPFVSQGEISVASIDDQEELIATDSAIDILGF  
TNEEKVSIYKLTGAVMHYGNLKFQKQREEQAEPDGTEDADKAAYLQSLNSADLLKALCYPRVK  
VGNEFVTKGQTVQVNAV GALAKAVYKMFVLMVTRINQQLDTKQPRQYFIGVLDIAGFEIFD  
FNSLEQLCINFTNEKLQQFFNHMFVLEQEEYKKEGIEWTFIDFGMDLAACIELIEKPMGIFSI  
LEEECMFPKATDTSFKNKLYEQHLGKSANFQKPKVVKGAEAHFSLIHYAGVVYDNI TGWLDKN  
KDPLNETVVGLYQKSSMKT LAYLFSGAQTAE---AKK-

GGKKKGSFQTVSALFRENLNKLMTNLRSTHPPHVRCLIPNETKTPGAMEHELVLHQLRCNGVL  
EGIRICRKGFPNRILYADFKQRYKVLNASAIPEGQFIDSKKASEKLLASIDIDHTQYKFGHTKV  
FFKAGLLG LLEEMRDDKLAQLITRTQARCRGFLARVEYQKMVERRESIFCIQYNIRAFMNVKHW  
PWMKLFKIKPLLSAETE KEMATMKEEFQKTKDELAKSEAKRKELEEKMVTLLEKENDLQVQ  
QAEAEGLADAEERCDQLIKTKIQLEAKI KEVTERAEDEEEINAELTAKRRKLEDECESELKDDID  
DLELTLAKVEKEKHATENKVKNLTEEMAGLDETI AKLTKEKKALQEAHQQTLDLQAEEDKVNT  
LTKAKIKLEQQVDDLEGSLEQEKLRMDLERAKRKLKLAQESIMDIENEKQQLDEKLLKKK  
EFEMSNLQSKIEDEQALGIQLQKKIKELQARIEELEEIEAERASRAKAQKQRSDLSRELEEIS

ERLEEAGGATSAQIEMNKKREAEFQKMRRDLEEATLQHEATAATLRKKHADSVAEELGEQIDNLQ  
RVKQKLEKEKSEMMEIDDLASNVE TVSKAKGNLEKMCRTLEDQVSELKSKEEEQORLINDLTT  
QRGRLQTESGEFSRQLDEKEALVSQLSRGKLAFTQQIEELKRQLEEEIKAKNALAHALQSSRHD  
CDLLREQYEEEQESKAELQRALSKANSEVAQWRTKYETDAIQRTTEELEAKKKLAQRLQAAEEH  
VEAVNAKCASLEKTKQRLQNEVEDLMLDVERTNAACAALDKKQRNFDKILA EWKQKYEETHAEL  
EASQKEARSLGTELFKMKNA YEESLDQLETLKRENKNLQEEISDLTEQIAEGGKRIHELEKIKK  
QVEQEKSEIQAALEEA EASLEHEEGKILRIQLELNQVKSEIDRKIAEKDEEIDQLKRNHIRVVE  
SMQTM LDAEIRSRNDAILRKKKMEGDLNEMEIQLNHANRMAAEALRNYRNTQGI LKDTQIHLDD  
ALRGQEDLKEQLAMVERRANLLQAEIEELRATLEQTERS RKIAEQELLDASERVQLLHTQNTSL  
INTKKKLETDISQIQGEMEDI IQEARNAEKAKKAITDAAMMAEELKKEQD TSAHLERMKKNME  
QTVKDLQHRLDEAEQLALKGKKQIQKLEARVRELEGEVESEQKRNAEAVKGLRKHERRVKELT  
YQTEEDRKNILRLQDLVDK LQAKVKS YKRQAE EAEQSN TNL SKFRKLQHELEEA EERADIAES  
QVNKL RVKSREVHTKVISEE

Q6DIX8\_Myosin\_\_heavy\_pol -

SDAEMAVFGPAAHFLRKSEKERIEAQNKPF DARTSMFVVDTKESYVKGTLOSKEGGKATVKTEA  
GQTVTVKDDQIFPMNPPKFDKIEDMAMMTHLNEPSVLYNLKERYAAWMIYTYSGLFCVTVNPNYK  
WLPVYNPEVVNAYRGKKRQEAPPHIFSI SDNAYQFMLTDRENQSILITGESGAGKTVNTKRVIQ  
YFATIAAAPDKKKEEVA---

GTLEDQIIQANPLLEAFGNAKTVRNDN SSRFGKFIRIHFGTTGKLASADIETYLLEKSRVTFQL  
KAERSYHIFYQIMSNNKPELIEMLLITTPYDFPFV SQGEISVASIDDTEELMATDS AIDILGF  
NADEKVS IYKLTGAVMHYGNMRFKQKQREEQAEPDGT EVADKAAYLMCLNSADLLKALCYPRVK  
VGNEYVTKGQTVQQVYNSVGALGKAVYEKMFLWMVTRINEMLDTKQPRQYF IGVLDIAGFEIFD  
FNSLEQLCINFTNEK LQQFFNHMFVLEQEEYKKEGIEWEFIDFGMDLAACIELIEKPMGIFSI  
LEEECMFPKATDTSFKNKLYDQHLGKSNNFQKPKPAKGAEAHFSLVHYAGTVDYNISGWLEKN  
KDPLNDTVIGLGFQKSSMKT LAYLFSSYAASE---AKK-

GGKKKGSSFQTVSALFRENLNKLSNLRTTHPHFVRCIIPNETKTPGAMEHELVLHQ LRCNGVL  
EGIRICRKGFP SRILYGD FQRYKILNASAIPEGQFIDSKKASEKLLG SIDVDHTQYRFGHTKV  
FFKAGLLGTLEEMRDDRLAHVITRTOAMCRGYLMRVEFKKMMERREAVFTIQYNI RSFMNVKHW  
PWMKLYFKIKPLLKSAESEKEMQNMKEEF EKT KELLAKSEAKRKELEEKMVKVLQEKNDLQ LQV  
QSESENLTDAEERC DQLIKSKIQLEAKMELNERLEDEEESNAELTAKKRKLEDECESELK KDID  
DLELTLAKVEKEKHATENKVKNLTEEMAVLDETI VKLTKKALQEAHQOTLDDLQAEEDKVNT  
LTKAKAKLEQQVDDLEGSLEQEKKLRMDLERSKRKLEGDLKLAQETIMDLENDRQQ LDEK LKKK  
EFEMSQYASKIEDEQALGAQLQKKIKELQARIEELEEIEAERAARAKAEKQRS DLSRELEEIS  
ERLEEAGGATSAQIEMNKKREAEFQKMRRDLEEATLQHEATAAALRKKQADSVAELGEQIDNLQ  
RVKQKLEKEKSELKMEIDDLASN MENLSKAKANFEKICRTLEDQLSELKTKDEEHQRQINDLTA  
QRARLQ TENG EYARQLEERDSLISQLSRGKQAF TQQIEELKRQLEEEIKAKNALAHGLQSARHD  
CDLLREQYEEEQEAKGELQRSLSKANGEVAQWRTKYETDAIQRTTELEDAKKKLAQRLQEAEEH  
IEAVNSK CASLEKTKQRLQNEVEDLMVDVERSNSACAALDKKQKNFDKILA EWKQKFEE SQAEL  
EASQKESRSLSTELFKMKNA YEESLDHLETTKRENKNLQEEISDLTEQVSEVSKTLHEVEKAKK  
IEQEKTEIQSALEEA EASLEHEEGKILRIQLELNQVKSEIDRKIAEKDEEIDQLKRNHVRVVE  
SMQSTLDAEIRSRNDALRLKKKMEGDLNEMEIQLSHANRQASESQKQLRNVQGLLKD VQIHLDD  
SLRAQEDLKEQLAMVERRANLMQAEI EEMRAALEQTERS RKVAEQELLDASERVQLLHSQNTSL  
INTKKKMETDITQLQTEVEEAIQEARNAEKAKKAITDAAMMAEELKKEQD TSAHLERMKKNLD  
QTVKDLQHRLDEAEQLAMKGGKKQIQKLEARVRELENEVDVEQKRSTEAIKGV RKYERRVKELS  
YQSEEDKKNILRLQDLVDK LQMKVKAYKRQTEEIEEQSNINLT KYRKIQHELEEA EERADIAES  
QVNKLRAKTREV-----

Q6DFQ6\_Myosin\_heavy\_pol

MGDAEMAVFGEAAPFLRKSDKERLEAQNKAFDAKNTCFVEDDKELYVKGLITAREGGKVTVKTE  
DARNVTVKESQVYPQNPPKFDKIEDMAMMTHLNEASVLYNLKERYAAWMIYTYSGLFCVTVNPY  
KWLPVYNPEVVAGYRGKKRQEAPPHIFSIDNAYQFMLQDRENQSVLITGESGAGKTVNTRKVI  
QYFATIAAIGDSNKKKEMS-  
GTLEDQIIQANPLLEAFGNAKTVRNDNSSRFGKFIRIHFGTTGKLASADIETYLLKSRVTFQL  
SAERSYHIFYQILTNKKPEIVEMLLLTNPYDYAFISQGEIYAVKSIDDEEELMATDSADIDILGF  
TAEKMGYIKMTGSVMHKGNMFKQKQREEQAEPDGTEVADKIGYLMGLNSADLLKALCYPRVK  
VGNEFVTKGQTVQQVYNAIGALSXSVEKLFLLWVTRINQQLDTKLPRQYFIGVLDIAGFEIFD  
LNSLEQLCINFTNEKLQQFFNHMMFVLEQEEYKKEGIDWEFIDFGMDLAACIELIEKPMGILSI  
LEEECMFPKATDTSFKNKLYDQHLGKCKNFEPKPAKGKAEAHFSLVHYAGTVDYNICGWLDKN  
KDPLNETVVGLYQKSSLKLLSFLYSSYAGTD---AKS-  
GKKKKGSSFQTVSALFRENLNKLMNLRSTHPPHVRCLIPNESKTPGIMENHLIIHQLRRCNGVL  
EGIRICRKGFPSPRILYGDFFKQRYKILNASAI PDGQFIDSKKACEKLLGSIDIDHTQYRFGHTKV  
FFKAGLLGTLEEMRDDKLAQLITRTOALCRGFLMRVEFKKMIERRDAIFVIQYNVRSFMNVKHW  
PWMKLYFKIKPLLKSAETEKEMANMKEEFEKTKEALTKSDARRKELEEKMVALLQEKNDLMLQC  
QSENE SLADAEERCEGLIKNKINLEAKIKELTERLEDEEESNAELTAKKRKLEDECESELKKDID  
DLELTLAKVEKEKHATENKVKNLTEEMAGLDETI SKISKEKKALQEAHQOTLDDLQAEEDKVSS  
LSKAKTKLEQQVDDLEGSLEQEKKLRLDLERAKRKLEGLKLAQETIMDLENDKQQTEEKLKKK  
DFELSQLQKIEDEQSVGCQLQKKIKELQARIEEVEVEEIEAERAARAKVEKQORADLSRELEEIS  
ERLEEAGGATSAQIEMNKKREAEFQKLRDLLEESTLQHEATSAAALRKKHADSVAEELGEQIDNLQ  
RVKQKLEKEKSELKMEIDDLASNLENVSKSKANLEKLSRVLEDQLSEIKSRDDEHQRIINDLTA  
QKARLQOTENGELSRQLEEKESLVSQLTRGKQGFTQQTEELKRQLEEETKAKNALAHALQSSRDH  
CDLLREQYEEEQEAKAELQRSLSKANTEVSQWRTKYETDAIQRTEELEEAKKKLAQRLQEAEEQ  
VEAVNSKCASLEKTKQRLQAEVEDLMDVVERANSAAAALDKKQRNFDKVLVVEWKQKYEESQAE  
EASQKESRSLSTEIFKMKNAYEEALEHLETMKRENKNLQQEISDLSEQIGESAKTTMELEKAKK  
QVEQERGDQAALAEAEGSLEHEEAKILRIQLELNQVKSEVDRKIAEKDEEIEQLKRNSQORVID  
TMQSTLDSEIRSRNDALRLKKKMEGDLNELEIQLGHANRQAGEAQKQLRNVQAQLKDTQIHLDD  
SVRAQEDLKEQLAVVDRRTTLQQAIEEMRVALEQTERS RKMAEQELLDASERVQLLHSQNTSL  
INTKKKLET DAGTLQ NEMEEAVQEARNAEEKAKKAITDAALMAEELKKEQDTSAHLERMKKNLE  
QTVKDLQHRLEAEQLAMKGGKKQLQKLESRVRELENELDNEQKRSVEAVKGVKRYERRVKELT  
YQSEEDRKNVLRQLDLVDKQLKVKAYKRQAESEEQANAHLARFRKVQHELEESEERADIAES  
QVNKLRAKSRDIGSK-----

B4F6Y1\_Putative\_uncharac

SDAEMAI FGVAAQFLRKTEKERIEAQNRPFDAKTSVFVIDPKQMYVKGIVQSKEGGKATVKKED  
MSTVTVKDDIEIFPMNPPKYDKIEDMAMMTHLNEPSVLYNLKERYAAWMIYTYSGLFCATVNPYK  
WLPVYNPEVVNAYRGKKRQEAPPHIFSIDNAYQFMLTDRDNQSILITGESGAGKTVNTRKVIQ  
YFATIAAIGDKKKEEAAPG-  
GTLEDQIIQANPLLEAFGNAKTVRNDNSSRFGKFIRIHFGTTGKLSSADIETYLLKSRVTFQL  
SAERSYHIFYQIMSNKRPELIDMLLITNPYDFPYVSQGEITVASIDDQEELMATDSADIDILGF  
NADEKVG IYKMTGAVMHYGNMRFKQKQREEQAEPDGTEVADKAAYLMGLNSADLLKALCYPRVK  
VGNEFVTKGQTVQQVYNSVGALGKSVEYKMFLLWVIRINQQLDTKQPRQHFIGVLDIAGFEIFD  
FNSLEQLCINFTNEKLQQFFNHMMFVLEQEEYKKEGIEWEFIDFGMDLAACIELIEKPMGIFSI  
LEEECMFPKATDTSFKNKLYDQHLGKSNNFQKPKPGKGAEAHSLVHYAGTVDYNISGWLDKN  
KDPLNETVIGLYQKSSVKLLSFLYSAYSAGTD---GKK-  
GGKKKGSSFQTVSALFRENLNKLMNLRSTHPPHVRCLIPNETKTPGAMDHYLMVHQLRRCNGVL  
EGIRICRKGFPSPRILYGDFFKQRYKILNASAIPEGQFIDSKKASEKLLGSIDVDHTQYKFGHTKV



FFKAGLLGTLEEMRDERLAQLITRTOAMCRGYLMRVEFROMMERRESIFCIQYNVRSFMNVKHW  
PWMKLYFKIKPLLKSAESEKEMQNMKEEFEKTKEALAKSEAKRKELEEKMVAILOEKNDLQLOV  
TSESEGLADAEERCEGLIKAKIQLEAKIKEANERLEDEEESNAELTAKKRKLEDECESELKKDID  
DLELTLAKVEKEKHATENKVKNLTEEMAVLDETI AKLTKEKKALQEAHQOTLDDLQAEEDKVNT  
LTKAKTKLEQQVDDLEGSLEQEKKLRMDMERAKRKLKLEGDLKLAQESTMDLENDRQQQLDEKVKKK  
EFEISQLQSKIEDEQALAAQLQKKIKELQARIEELEEIEAERAARAKAEKQRSDLRSRELEEIS  
ERLEEAGGATSAQIEMNKKREAEFQKMRRDLEEATLQHEATASALRKKQADSVAELGEQIDNLQ  
RVKQKLEKEKSELKMEIDDLASNMESVSKAKSNLEKMCRTLEDQFSEVKTKEDEHLRVINDINA  
QRARLHTENGEYARQLEEKESLISQLSRGKQAFQTQQTEELKRQLEEETKAKNALAHGLQSARHD  
CDLLREQYEEEQEAKGELQRSLSKANSEVSQWRTKYETDAIQRTTEELEEAKKKLAQRLQEAEEQ  
IEAVNSKASLEKTKQRLQGEVEDLMVDVERSNSACAALDKKQKNFDKVLADWKQKFEESSQAE  
EASQKESRSLSTEVFKMKNSEYEEALDQLETLLKRENKNLQOEISDLTEQVAEAGKSIHEIEKAKK  
QIESEKSDLQAALAEAGSLEHEEAKILRIQLELNQVKGEIDRKIAEKDEEIEQLKRNSQRALE  
SMQSTLDAEIRSRNDALRLKKKMEGDLNEMEIQLSHANRQAAESQKQLRNVQGLLKDTQLHLDD  
AQRGNDDLKEQLAIVERNNLMTAEIEEMRSALEQTERGRKVAEQELIDVTERVQLLHSONTSL  
INTKKKIEADVSQLOSEVEEAVQEARNADEKAKKAITDAAMMAEELKKEQDTS AHLERMKKNLE  
QTVKDLQHRLDEAEQLAMKGGKKQLQKLEARVRELENELEDAEQKRGSDAIKGVKRFERRVKELS  
YQSEEDKKNVFRQLQDLVDKLLQKVKAYKRQSEEDVEEQANVHLSRFRKAQHELEEAERADIAES  
QVNKLRAKSRDIGKKA----

UPI00006A2578\_Myosin\_he

MGDAEMAVFGEAAPFLRKS DKERLEAQNKAFDAKNTCFVEDDKELYVKGLITAREGGKVTVKTE  
DARNVTVKESQVYPQNP PKFDKIEDMAMMTHLNEASVLYNLKERYAAWMIYTYSGLFCVTVNPY  
KWLPVYNPEVVAGYRGKKRQEAPPHIFSI SDNAYQFMLQDRENQSVLITGESGAGKTVNTKRVI  
QYFATIAAIGDSNKKKEMS-

GTLEDQIIQANPLLEAFGNAKTVRNDNSSRFGKFIIRIHFGTTGKLASADIETYLLEKSRVTFQL  
SAERSYHIFYQILTNKKPEIVEMLLLTTNPYDYAFISQGEI AVKSIDDEEELMATDSAIDILGF  
TAEKMG IYKMTGSVMHKGNMKFKQKQREEQAE PDGTEVADKIGYLMGLNSADLLKALCYPRVK  
VGNFVTKGQTVQQVYNSIGALS KSVFEKFLFWMVTRINQQLDTKLPRQYFIGVLDIAGFEIFD  
LNSLEQLCINFTNEKLQQFFNHMFVLEQEEYKKEGIDWEFIDFGMDLAACIELIEKPMGILSI  
LEEECMFPKATDTSFKNKLYDQHLGKCKNFEPKPAKGAEAHFSLVHYAGTVDYNICGWL DKN  
KDPLNETVVGLYQKSSLKLLSFLYSSYAGTD---AKS-

GKKKKGSSFQTVSALFRENLNKLMTNLRSTHPPHVRCLIPNESKTPGIMENHLIIHQLRNCGVL  
EGIRICRKGFP SRILYGD FKQRYKILNASAI PDGQFIDSKKACEKLLGSIDIDHTQYRFGHTKV  
FFKAGLLGTLEEMRDDKLAQLITRTOALCRGFLMRVEFKKMIERRDAIFVIQYNVRSFMNVKHW  
PWMKLYFKIKPLLKSAETEKEMANMKEEFEKTKEALTKSDARRKELEEKMVALLQEKNDLMLQC  
QSENE SLADAEERCEGLIKNKINLEAKIKELTERLEDEEESNAELTAKKRKLEDECESELKKDID  
DLELTLAKVEKEKHATENKVKNLTEEMAGLDETI SKISKEKKALQEAHQOTLDDLQAEEDKVSS  
LSKAKTKLEQQVDDLEGSLEQEKKLRDLERAKRKLKLEGDLKLAQETIMDLENDKQQTEEKLK  
DFELS QLQGKIEDEQSVGCQLQKKIKELQARIEEVEEIEAERAARAKVEKQRADLSRELEEIS  
ERLEEAGGATSAQIEMNKKREAEFQKLRRDLEESTLQHEATS AALRKKHADSVAELGEQIDNLQ  
RVKQKLEKEKSELKMEIDDLASNLENVSKSKANLEKLSRVLEDQLSEIKSRDDEHQRIINDLTA  
QKARLQTENGELSRQLEEKESLVSQLTRGKQGFTQQTEELKRQLEEETKAKNALAHALQSSRHD  
CDLLREQYEEEQEAKAELQRSLSKANTEVSQWRTKYETDAIQRTTEELEEAKKKLAQRLQEAEEQ  
VEAVNSKASLEKTKQRLQAEVEDLMVDVERANSAAAALDKKQRNFDKVLVWKQKYEESQAE  
EASQKESRSLSTEIFKMKNAYEEALEHLETMKRENKNLQOEISDLSEQIGESAKTTMELEKAKK  
QVEQERGD LQAALAEAEARLA-

SATNALRWSLELNQVKSEVDRKIAEKDEEIEQLKRNSQRVIDTMQSTLDSEIRSRNDALRLKKK

MEGDLNELEIQLGHANRQAGEAQKQLRNVQAQLKDTQIHLDDSVRAQEDLKEQLAVVDRRTTLO  
QAEIEEMRVALEQTERS SRKMAEQELLDASERVQLLHSQNTSLINTK KKKLETDAGTLQ NEMEEAV  
QEARNAEEKAKKAITDAALMAEELKKEQDTSAHLERMKKNLEQTVKDLQHRLDEAEQLAMKGGK  
KQLQKLES RVRELENE LDNEQKRSVEAVKGV RKYERRVKELTYQSEEDRKNVLR LQDLVDK LQL  
KVKAYKRQAE ESEEQ ANAHLARFRKVQHELE ESEERADIAESQVNKLRAKSRDIGSK-----

Q75UE1\_L\_japonica\_Myosi --

MGDLHEFGKAAPFLRKSEKERLEAQTRPFDMMKKNCFVDDPKIEFVKATIKSSEGGKVTVDTENG  
QTVTVREDQVHQMNPPKFDKIEDMVMLTFLNEPSVLFLNLKERYAAWMIYTYSGLFCVTVNPKM  
LPVYDPIVVAGYRGKKRQEAPPHIFSI SDNAYQFMLS DRENQSILITGESGAGKTVNTRVIQY  
FATIAALGDSAKKKQEGKIGTLEDQIVEANPLMEAFGNAKTVRNDNSSRFGKFIRIHF GATGKL  
ASADIETYLLKSRVTFQLPTERNYHIF FQILSQKPELLDMLLVTTNPDYDPIFSQGEITVSS  
IDDK EELMATDSAIEILGFTNEEKMSIYKLTGSIMHYGNMKFKQKQREEQAEPDGSEADKACF  
LMGINSADLLKALCLPRVKVGN EYVTKGQTVPQVYNNIGALGKACFERLFLWMVIRINQSLDTK  
QARQHFIGVLDIAGFEIFDFNTFEQLCINFTNEKLQQFFNHMMFVLEQE EYKKEGIDWVFI DFG  
MDLQACIDLIEKPLGIMSILEEQCMFPKANDQTFKEKLYDQHLGKNKFFQKPKPSKGKHEAHFS  
LGHYAGNV DYNIA GWLEKNK DPLNDSVVQVYQKASLKV LGALFATFAGADADSGAK-  
KGKKKGS SFQTVSALHRENLSKLMTNLKTTHPHFVRCLIPNETKTPGTM DNNLVMHQ LRCNGVL  
EGIRICRKGFPNRI VYGDFKQRYRVLNPNAMPEGQFVDSKKACEKLMASLELDETQYKFGHTKV  
FFRAGLLGTLEEMRDDRLSLLLTRTQALGRGYLSRVEFKKMLERRESLIVIQYNIRAFMGVKNW  
PWMNLYFKIKPLLKSAESEKEMANMKEEFIKTKEALEKSEARRKELEEKMISVVQEKNDLLMQV  
QSGEDSINDSEERC DQLIKAKIQLESKLEKEMQERIEEEEEEMNSELTAKKRKLEDECESELK K DID  
DLELTLAKVEKEKHATENKVKNLTEEMAVLDENVSKLTKEKKALQEAHQQTLDLQAEEDKVNS  
LTKAKAKLEQQVDDLEGSLEQEKKVRMDIERTKRKLEGDFKMAQESIMDLENDKQQIDEKTKKK  
DFEISQLNSKIEDELALSAQLQKKIKELQARIEELEEIEAERAARAKVEKQRS DLSRELEEIS  
ERLEEAGGATSAQIEMNKREAEFQKLRRDLEESTLQHEATAAALRKKQADSVAELGEQIDNLQ  
RVKQKLEKEKSEFKMEVDDLSSNMEQITKSKVNLEKLSRSLEDQ LSELKTKDDENIR TINDITA  
QRARLQTESGELTRKLEEKVLLVQLSRGKQSYTQQVEDLKRQLEEEVKAKNALAHAVQSARHD  
CDLLREQFDEEQEAKGELQRAMSKANA EVAQWR TKYETDAIQRTEELED AKKKLAARLQDAEEQ  
VEAANSK CASLEKTKQRLQGEVEDLMI DVERAHSAAAALDKKQKAFDKVLSEWKQKFEE SQAEL  
EAAQKESRSLGTELFKLKNAYEETLDHLETFKRENKNLQEEISDLTEQLGESSKSLHELEKNRK  
AIEQEKSDIQAALEAEASLEHEEGKILRVQLELNQVKA EVDRKIAEKDEEIDQIKRGFQRTVE  
SMQATLDSETKSRNEALRLKKKMEGDLNEMEIQLNHANRQAAESQKHLRNVQGQIKDLQVHLLD  
ALRANEDHKEQAAMLERRNNLLVAEVEEMRSALEQTEKARKLAEQELLGATERVQLLHSQNTSL  
INTKRKLEGDLSQLQSEVEESI QESRNADEKAKKAITDAAMMAEELKKEQDTSAHLERMKKNME  
QTVKDLQHRLDEAEQIAMKGGKKQLQKLETRVRELESELDAEQRRTAETIKGSRKYERRIKELS  
YQTEEDRKNLRLQDLVDK LQLKVKAYKRQSE ESEEQANTNLSKYRKLQHELEEADERADIAES  
QVNKLRRARSRDSGV-----

A6QPA6\_Bos\_taurus\_MYH3\_p -

SDTEMEVFGIAAPFLRKSEKERIEAQNQPFDAKTYCFVDSKEEYAKGRIKSTQDGKVTVETED  
NRTL VVKPEDVYAMNPPKFDRIEDMAMLTHLNEPAVLYNLKDRYTSWMIYTYSGLFCVTVNPK  
WLPVYNPEVVEGYRGKKRQEAPPHIFSI SDNAYQFMLTDRENQSILITGESGAGKTVNTRVIQ  
YFATIAATGDLAKKKDS---  
GTLEDQIISANPLLEAFGNAKTVRNDNSSRFGKFIRIHF GTTGK LASADIETYLLKSRVTFQL  
KAERSYHIFYQILSNKKPELIELLLITNPDYDPIFSQGEILVASIDDAEELLATDSAIDILGF  
TPEEKSGLYKLTGAVMHYGNMKFKQKQREEQAEPDGTEVADKTAYLMGLNSSDLLKALCFPRVK  
VGNEYVTKGQTVDQVHHAVNALSKSVYEKLF LWMVTRINQQLDTKLPRQHFIGVLDIAGFEIFE  
YNSLEQLCINFTNEKLQQFFNHMMFVLEQE EYKKEGIEWTFIDFGMDLAACIELIEKPMGIFSI

LEEECMFPKATDTSFKNKLYDQHLGKSANFQKPKVVKGRAEAHFSLIHYAGTVDYSVSGWLEKN  
KDPLNETVVGLYQKSSNRLLAHLYATFTTAD---KKK-  
VAKKKGSSFQTVSALFRENLNKLMNSLRTHPHFVRCIIPNETKTPGAMEHSLVLHQLRRCNGVL  
EGIRICRKGFPNRILYGDYKQRYRVLNASAIPEGQFIDSKKACEKLLASIDIDHTQYKFGHTKV  
FFKAGLLGTLEEMRDDRRLAKLITRTOAVCRGFLMRVEFQKMQRRRESIFCIQYNIRAFMNVKHW  
PWMKLEFFKIKPLLSAETEKEMATMKEEFQKTKDELAKSEAKRKELEEKLVTLVQEKNDLQLOV  
QAESENLLDAEERCQDLIKAKFQLEAKI KEVTERAEDEEEMNAELTAKKRKLEDECESELKKDID  
DLELTLAKVEKEKHATENKVKNLTELGLDETI AKLTREKKALQEAHQOTLDDLQAEEDKVNS  
LSKIKSKLEQQVDDLESSLEQEKKLRVDLERNKRKLEGLKLAQESILDLENDKQQOLDERLKKK  
DFEYCQLQSKVEDEQTLGLQFQKKIKELQARIEELEEIEAERATRAKTEKQORSYARELEELS  
ERLEEAGGVSTSTQIELNKKREAEFLKLRDLLEATLQHEAMVAALRKKHADSV AELGEQIDNLQ  
RVKQKLEKEKSEFKLELDDLGSNVE SVSKSKANLEKICRTLEDQLSEARGKNEEIQRSLSELST  
QKSRLQTEAGELSRQLEEKESTVSQLSRKQAFQOIEELKRQLEEE SKAKSALAHALQSARHD  
CDLLREQYEEEQEAKAELQRALSKANSEVAQWRTKYETDAIQRT EELEEAKKKLAQRLQDSEEQ  
VEAVNAKCASLEKTKQRLQAEVEDLMVDVDRANSLAAALDKKQRNFDKVLAEWKTKGEESQAE  
EASLKESRSLSTELFKLNAYEEALDQLETVKRENKNLEQEIADLTEQIAESGKTIHELEKSRK  
QIELEKADIQLALEEAEAALEHEEAKILRIQLELTQVKSEIDRKMAEKDEEIEQLKRNYQRTVE  
TMQSALDAEVRSRNEAIRIKKKMEGDLNEIEIQLSHANRQAAETVRHLRSVQGQLKDTQLHLDD  
ALRGQEDLKEQLAIVERRANLLQAEVEELRATLEQTTERSRIAEQELLDASERVQLLHTQNTSL  
IHTKKKLETDLAQLQSEVEDASRDARNAEEKAKKAITDAAMMAEELKKEQD TSAHLERMKKNLE  
QTVKDLQHRLEAEQLALKGGKKQIQKLETRIRELESELEGEQKKNTE SVKGLRKYERRVKELT  
YQSEEDRKNVLRQLDLVDKLMKVKSYKRQAE EADEQANAHLTKFRKAQHELEEAERADIAES  
QVNLKRAKTRDFTS-----

UPI0000E81268\_G\_gallus\_ -

SDAEMAI FGEAAPYLKSEKERIEAQNRPFDAKAACFVVDQKQMYVKGTIQSREGGKVTVKTYD  
DTT VTVKDDEVFPMNPPKYDKIEDMAMMTHLHEPAVLYNLKERYAAWMIYTYSGLFCVTVNPKY  
WLPVYNPEVVSgyrgkkrQEAPPHIFSI SDNAYQFMLTDRDNQSILITGESGAGKTVNTRKVIQ  
YFATIAVTGEKKKQQPS--

GTLEDQIISANPLLEAFGNAKTVRNDNSSRFGKFIRIHFGTTGKLASADIETYLLKSRVTFQL  
ASERSYHIFYQIMSNNKPELIDLLLISTNPNYDFAYVSQGEITVASIDDSEELLATDNAVDILGF  
SPDEKVGMYKLTGAVMHYGNMFKQKQREEQAE PDGTEVADKAAYLMGLNSAELLKALCYPRVK  
VGNEYVTKGQNVQQVYNSV GALAKSVYEKMF LWMVTRINQQLDTKQPRQHFIGVLDIAGFEIFD  
FNSLEQLCINFTNEKLQQFFNHMFVLEQE EYKKEGIDWEFIDFGMDLAACIELIEKPMGIFSI  
LEEECMFPKATDTSFKNKLYDQHLGKSNNFQKPKPAKGAEAHFSLVHYAGTVDYNISGWLEKN  
KDPLNETVVGLYQKSSLLKLSFLFSNYAGAE---GKK-

GAKKKGGSFQTVSAVRENLNKLMNTLRSTHPHFVRCIIPNETKTPGEMDHYLVMHQLRRCNGVL  
EGIRICRKGFPNRIYADFKQRYKILNASAIPEGQFIDSKKASEKLLSSIDVDHNQYRFGHTKV  
FFKAGLLGLLEEMRDEKLVNLI THMQAMCRGYLMRTEFKKMNARRESIYIIQYNVRAFMNVKHW  
PWMKLYFKMKPMLKSVESEKEMANMKEEFEKTKEELAKSEAKRKELEEKMVTLLQEKNDLQLOV  
QSESENLADAEERCEGLIKSKIQL EARIKELNERMEDEEEMNAELTAKKRKLEDECESELKKDID  
DLELTLAKVEKEKHATENKVKNLTEEMAALDENISKLTKEKKALQEAHQOTLDDLQAEEDKVST  
LTKTKTKLEQQVDDLEGSLEQERKQRM DLERAKRKL DGLKMSQDSIMDLENDKQQMDEKLKKK  
DFEISQLQSKIEDEQAQSSQLQKKIKELQARTEELEEIEAERAIRAKTEKQORADLSRELEEIS  
ERLEEAGGATAAQIEMNKKREAEFQKMRRDLLEATLQHEATAAALRKKHADSTAELGEQIDNLQ  
RVKQKLEKEKSELKMEIDDLASNME SVSKAKSNLEKMCRALEDQYSEVRTKDDEHMRLINDMNT  
QKTRLQOTENGELTRQLEEKESLISQLTRGKQAITQOTEELKRQLEEEENKAKNALAHALQSARHD  
CDLLREQYEEEQEAKSELQRALSKANSEVAQWRTKYETDAIQCMEELEDAKKKLAQRLQDSEEQ

IEAVNSKCASLEKTKQRLQGEVDDLMI AVERSNAACAAFDKKQKNFDKVM AEWQKYQESQAELEAAQKESRTLSTEIFQMKNAYEEVLDQVETVRRENKNLQQEISDLTEQLAEAGKASHGLEKAKKQTEQEKYDLQAALEEAEGSLEHEEGKILRVQLELNQVKS DVDRRSAEKDEEIQQLKKNHQRVLESMQTTLD AEIRSRNDALRLKKKMEGDLNDMEIQLSRANCQVAETQKHLKVVQGLKDSQLHLDDALREND DLKEQLAVIERRNNLMTELEQMRAALEQTERARKVSEQELTDASERVQILHSQNTSL LNTKKKLEVDITHLQNEVEDSIQEARN AEEKAKKAITDAAMMAEELKKEQD TSAHLERMKRNLE QMVKDLQHRLDEAEQLALKGGKKQLQKLEARIHELENELDIEQKRGTESLKGARKYERRLKELT YQSEEDKKNILRLQNLVDK LQLKV KAYKKQAEAEQASTNLSRCRKTQHELEEAERADIAEC QVNKLRAKSRDVG-----

Q6NX33\_Myosin\_heavy\_chai

MGDGEMSI FGEAAQFLRKSEKERLEAQSKPFDKNTVFVDDVKELYVKGMVTAREDGKITVKTDDGRTVTVKENQIYPQNPPKFDKIEDMAMMTHLNEASVLYNLKERYAAWMIYTYSGLFCATVNPYKWLVPVYNPEVVAGYRGKKRMEAPPHIFSLSDNAYQAMLT DRENQSVLITGESGAGKTVNTKRVI QYFATIAALGD--KKKSSN-

GNLEDQIIQANPLLEAFGNAKTVRNDNSSRFGKFIRIHF GTTGKLSADIETYLLKSRVTFQL SAERSYHIFYQIILTNKKPEIVEMLLLTTNPYDYP SISISQGELVVK SINDEEELMATDSAIDVLGF NQEEKMGIYKMTGAVMHG NLFKFKQKQREEQAEPDSTEVADK IAYLLGLNSADLLKGLCYPRVK VGNEFVTKGQTPVQVYNSV GALCKSVFEKLF LWMVTRINQQLDTKQPRQFFIGVLDIAGFEIFD FNSLEQLCINFTNEK LQQFFNHMFVLEQEEYKKEGIDWEFIDFGMDLAACIELIEKPLGIFSI LEEECMF PKATDTSFKNKLYEQHLGKCKNF EKPKPGKGKAEAHFSLVHYAGTVDYNISGWLEKN KDPLNESV VQLYQKSSVKLLSLLYSSYAATDDAGGKG-

GKKKKGSSFQTVSGLFRENLNKLMTNLRSTHPHFVRCLIPNETKTPGIMDNHLLIHQLRCNGVLEGIRICRKGFP SRILYGD FQRYKVLNASAIPEGQFIDSKKACEKLLGSIDVDHTQYKFGHTKVF FFKAGLLGTLEEMRDEKLAQLITR TQALCRGYLMRLEFTKMMERREAIYVIQYNLRSFMNVKHW PWMKLYFKIKPLLKSAETEKEMANMKEEFEKTKEALVKA EARKKELEEKMVAMLQEKNDLVLQV QSESETLADSEERCEGLIKVKIQLESKIKELTERLEDEEESNAELTAKKRKLEDECSELKKDID DLELTLAKVEKEKHATENKVKNLTEEMAVLDENISKLSKEKKALQEAHQOTLDDLQAEEDKVSS LSKAKTKLEQQVDDLEGSLEQEKRLRLDLERAKR KLEGDLKLTQETVMDLENDKQQTEEKLKKK DFEISQLQGKIEDEQSLGTQLQKKIKELQARIEEVEEEEIEAERAARAKVEKQRADLSRELEEIS ERLEEAGGATSAQIEMNKKREAEFQKLRRDLEEATLQHEATAGALRKKHADSV AELGEQIDNLQ RVKQKLEKEKSELKMEIDDLASNLENVSKSKANLEKVN RVIEDQLSEVKAKDDEHQRLNLDLST QKARLQTETGELSRQLEERESLISQLSRGKQGFTQQVEELKRQLEEE TKAKNALAHALQSARHD CDLLREQFEEEQEAKAELQRSLSKANGEVSQWR TKYETDAIQRTEELEEAKKKLAQRLQDAEEQ VEAVNSKCASLEKTKQRLQSEVEDLMVDVERANSAAAALDKKQRNFDKVLVEWKQKYEEGQAELEAALKESRSLSTEIFKMKNAYEEALEHVETLKRENKNLQQEISDLTEQIGESGKSVVELEKAKKQVEQEKN DLQAALEEAEGSLEHEEAKILRIQLELNQVKSEVDRKIAEKDEEIEQLKRNSQRSID TMQSTLDSEIRSRNDALRLKKKMEGDLNELEIQLGHANRQASEAQKQLRN VQGQFKETQLQLDE AIRAQEDLKEQVAVTERRNNLFQAEIEENRAGLEQTERS RKIAEQELLDASERLQLLHSQNTSL INSKKKLES DICQLQNEAEAEAVQEARNAEEKAKKAITDAALMAEELKKEQD TSAHLERMKKNLE QTVKDLQHRLDEAEQLAMKGGKKQLQKLESRVRELENE LDNEQKHGVEAVKGV RKYERRVKELTYQTEEDKKNILRLQDLVDK LQSKVKAYKRQAEAEQANTHLGRFRKVQHELEEAERADIAES QVNKLRTKSRDIGGKKESEE

Q90339\_C\_\_carpio\_Myosin\_

MGDGEMECFGPAAVYLRKTERERIEAQNTPFDAKTAFVVD PDEMYLKGTLSKEGGKATVKT HSGKTVTVKEDEIFPMNPPKFDKIEDMAMMTHLNEPAVL FNLKERYAAWMIYTYSGLFCVTVNPY KWLVPYDAVVVGGYRGKKRIEAPPHIFSISDNAYQFMLT DRENQSVLITGESGAGKTVNTKRVI QYFATV GAMS GPKPEPVPG-

GSLEDQIVAANPLLEAYGNAKTVRNDNSSRFGKFIRIHFGTTGKLASADIETYLLLEKSRVTFQL  
SAERSYHIFYQLMTGHKPELLEALLITTNPYDYPMISQGEITVKSINDVEEFIATDTAIDILGF  
TADEKIS IYKLTGAVMHGHNMKFKQKQREEQAEPDGTEVADKIAYLMGLNSADMLKALCFPRVK  
VGNEMVTKGQTVPQVNNASALS SVYEKMF LWMVIRINEMLDTKQPRQFFIGVLDIAGFEIFD  
FNSLEQLCINFTNEKLQQFFNHMFVLEQEEYKKEGIEWEFIDFGMDLAACIELIEKPMGIFSI  
LEEECMFPKATDTSFKNKLHDQHLGKTA AFQKPKPAKGAEAHFSLVHYAGTVDYNI VGWLDKN  
KDPLNDSVVQLYQKSSSLKVLAFLYATGAE--GGGK--

GKKKGGSFQTVSALFRENLGKLMNLRSTHPPHVRCLIPNESKTPGLMENYLVIHQLRNGVLE  
GIRICRKGFP SRILY GDFKQRYKVLNASVIPEGQFIDNKKASEKLLGSIDVDHTQYKFGHTKVF  
FKAGLLGALEEMRDEKLALLVTMTQALCRGYVMRKEFVKMMERRESIYSIQYNIRSF MNVKHWP  
WMKLYFKIKPLLKSAETEKEMAAMKENYKMKEDLTKALAKKKELEEKMVSLLOEKNDLQLOVT  
AESENLSDAEERCEGLIKSKIQLEAKLKETNERLEDEEEINAELTAKKRKLEDECESELKKDIDD  
LELTLAKVEKEKHATENKVKNL TEEMASQDESIAKLTKEKKALQEAHQQTLDLQAEEDKVNTL  
TKAKTKLEQQVDDLEGSLEQEKKLRMDLERAKRKL EGD LKLAQESIMDLENEKQOSDEKIKKKD  
FEISQLLSKIEDEQSLGAQLQKKIKELQARIEELEEIEAERAARAKVEKQRADLSRELEEISE  
RLEEAGGATAAQIEMNKKREAEFQKMRDLEESTLQHEATAAALRKEQADSV AELGEQIDNLQR  
VKQKLEKEKSEYKMEIDDLTSNMEAVAKAKANLEKMCRTLEDQLSEIKTKSDENVRQLNDMNAQ  
RARLQ TENGEFSRQLEEEKEALVSQLTRGKQAYTQQIEELKRHIEEEVKAKNALAHAVQSARHDC  
DLLREQYEEEQEAKAELQRGMSKANSEVAQWRTKYETDAIQRT EEELEEA KKKLAQRLQDAEESI  
EAVNSK CASLEKTKQRLQGEVEDLMIDVERANSLAANL DKKQRNFDKVLAEWKQKYEESQAELE  
GAQKEARSLSTELFKMKNSYEEALDHLET LKRENKNLQQEISDLTEQLGETGKSIHELEKAKKT  
VESEKSEIQTALEEAEGTLEHEESKILRVQLELNQVKSEIDRKLAEKDEEME QIKRNSQRVIDS  
MQSTLDSEVRSRNDALRVKKMEGDLNEMEIQLSHANRQAAEAQQLRNVQGGQLKDAQLHLDEA  
VRGQEDMKEQVAMVERRNSLMQAEIEELRAALEQTERGRKVAEQELVDASERVGLLHSQNTSLI  
NTKKKLEADLVQVQGEVDDAVQEARNAEEKAKKAITDAAMMAEELKKEQD TSAHLERMKNLEV  
TVKDLQHRLEAESLAMKGGKKQLQKLESRVRELEAEVEAEQRRGADAVKGV RKYERRVKELTY  
QTEEDKKNVIRLQDLVDKQLKVKVYKRQAEAEAEQTNTHLSRYRKVQHELEEAQERADVAESQ  
VNKLRAKSRDAG-----

Q076A8\_Canis\_lupus\_Devel -

SDTEMEVFGIAAPFLRKSEKERIEAQNQPFDAKTYCFVVD SKEEYAKGRIKSSQDGKVTVETED  
NRTL VVKPEDVYAMNPPKFDRIEDMAMLTHLNEPAVLYNLKD RYTSWMIYTYSGLFCVTVNPNYK  
WLPVYNPEVVEGYRGKKRQEAPPHIFSI SDNAYQFMLTDRENQSILITGESGAGKTVNTKRVIQ  
YFATIAATGDLAKKDS---

GTLEDQIISANPLLEAFGNAKTVRNDNSSRFGKFIRIHFGTTGKLASADIETYLLLEKSRVTFQL  
KAERSYHIFYQILSNKKPELIELLLITTNPYDYPFISQGEILVASIDD AEELLATDS AIDILGF  
TPEEKSGLYKLTGAVMHYGNMKFKQKQREEQAEPDGTEVADKTAYLMGLNSSDLLKALCFPRVK  
VONEYVTKGQTVDQVHHAVNALS SVYEKLF LWMVTRINQQLDTKLPRQHFIGVLDIAGFEIFE  
YNSLEQLCINFTNEKLQQFFNHMFVLEQEEYKKEGIEWTFIDFGMDLAACIELIEKPMGIFSI  
LEEECMFPKATDTSFKNKLYDQHLGKSSNFQKPKVVKGRAEAHFSLIHYAGTVDYSVSGWLEKN  
KDPLNETVVGLYQKSSNRLLAHLYATFATAD---KKK-

VAKKKGSSFQTVSALFRENLNKLSNLRTHPPHVRCLIPNETKTPGAMEHSLVLHQLRNGVL  
EGIRICRKGFPNRILY GDFKQRYRVLNASAIPEGQFIDSKKACEKLLASIDIDHTQYKFGHTKV  
FFKAGLLGTLEEMRDDRLAKLITRTOAVCRGFLMRVEFQKMQRRRESIFCIQYNIRAFMNVKHW  
PWMKLPFKIKPLLKSAETEKEMATMKEEFQKTKDELAKSEAKRKELEEKLVTLVQEKNDLQLOV  
QAESENLLDAEERC DQLIKAKFQLEAKI KEVTERAEDEEEINAELTAKKRKLEDECESELKKDID  
DLELTLAKVEKEKHATENKVKNL TEELAGLDETI AKLTREKKALQEAHQQALDDLQAEEDKVNS  
LTKIKSKLEQQ---

LESSLEQEKKLRVDLERNKRKLEGDLKLAQESILDLENDKQQLDERLKKKDFEYSQLQSKVEDE  
QTLGLQFQKKIKELQARIEELEEEIEAERATRAKTEKQRSYARELEELSERLEEAGGVTSTQI  
ELNKKREAEFQKMRRDLEEATLQHEAMLATLRKKHADSVAELGEQIDNLQRVKQKLEKEKSEFK  
LEIDDLSSNVESVSKSKANLEKICRTLEDQLSEARGKNEEIQRSMSELATQKSRLQTEAGELSR  
QLEEKESIVSQLSRSKQAFQTQIEELKRQLEEEESKAKNALAHALQSSRHDCDLLREQYEEEQEG  
KAELQORALSKANSEVAQWRTKYETDAIQRTEELEEAKKKLAQRLQDSEEQVEAVNAKCASLEKT  
KQRLQGEVEDLMVDVERANSLAAALDKKQRNFDKVVAEWTKCEESQAELEASLKESRSLSTEL  
FKLKNAYEEALDQLETVKRENKNLEQE IADLTEQIAENGKTIHELEKSRKQIELEKADIQLALE  
EAEAALHEHEEAKILRIQLELTQVKSEIDRKIAEKDEEIEQLKRNYQRTVETMQSALDAEVRSRN  
EAIRLKKKMEGDLNEIEIQLSHANRQAAETLKHLSVQGLKDTQLHLDDALRGQEDLKEQLAM  
VERRANLLQAEVEELRASLEQTERARKLAEQELLDANERVQLLHTQNTSLIHTKRKLEADLTQL  
QSEVEDASRDARNAEEKAKKAITDAAMMAEELKKEQD TSAHLERMKKNMEQTVKDLQHRLEAE  
QLALKGGKKQIQKLETR-----

SVKGLRKYERRVKELTYQSEEDRKNVLRQLDVLQVVKVSKYKRQAEAEDEQANAHLTKFRKA  
QHELEEAERADIAESQVNKLRAKTRDFTS-----

Q4T2B5\_T\_nigroviridis\_C

MSDSLMAEFGKAAPYLRKSEKERLEAQTRAFDIKTECFVVEKVEYVKGQIQSRDGGMVTVRRE  
DGATVSVPESGVHPQNPPKFDKIEDMAMFTFLHEPAVLFNLKERYAAWMIYTYSGLFCVTVNPNY  
KWLPVYDAEVVAAYRGKKRSEAPPHIFSI SDNAYQYMLSDRENQSVLITGESGAGKTVNTKRVI  
QYFASIAAVGGSSRKDASK--

GTLEDQIIQANPALEAFGNAKTVRNDNSSRFGKFIRIHFGPSGKLSADIETYLLEK-----  
-----V-----

QGEVTVASINDSEELMATDSAFDVLGFTPEEKMGVYKLTGAIMHYGNMFKFQRQREEQAE PDGT  
EAADKSAYLMGLNSSDLIKGLCHPRVKVGNEYVTKGQSVQVYYALGALAKSVYEKMFNWMVVR  
INQSLDTKQHRQYFIGVLDIAGFEIFDFNTFEQLCINFTNEKLQOFFNHHMFVLEQEEYKKEGI  
DWEFIDFGMDLQACIDLIEKPLGILSILEEECMFPKASDQTFKSKLYDNHLGKNKMFEPRAAK  
GRAEAHFALVHYAGTVDYNITNWLVKNKDPLNETVVGLYQKSSLLKLLSLLFSTYSSDSSDKGGS  
KGAKKKGSSFQTVSALHRENLNKLMTNLKTTHPHFVRCLIPNERKSPGVMNCLVMHQLRCNGV  
LEGIRICRKGFPNRVLYGDFKQRYRILNAAAIPEGQFIDCKKSAEKLLGSLDIDHTQYKFGHTK  
VFFKAGLLGTLEEMRDEQLSRI LTRI QANARGILMRARFAKMVEQRDALMVIQWNLRSFLGVKN  
WPWMKLLFFKIKPLLKSAEAEKEMASMKDEFNKLKEALEKSESRRKELEEKIVTLLQEKNNLTLO  
IQSEQDTLTDAAERCEQLIKSKIHLAKLKEMAERLEDEEEMNADLTAKRRKLEDECSELKKDI  
DDLELTLAKVEKEKHATENKVKNLIEEMASQDATIAKLSKEKKALQEAHQQTLDLQSEEDKAN  
SLSKAKAKLEQQVDDLEGSLEQEKKVRMDMERSKRKLEGDLKLLQESMMDLDNDKQOLEEKLKK  
KDFETVQLNSRLEDEQAAASQLQKCLKESQARMEELEEELEAERAARAKVEKQRADLSRELEDI  
SERLEEAGGATSAQAELNKKRDAEFQKLRRELEELTLQHESTAAALRKKHADSVAELGEHIDNL  
QRVKQKLEKEKRELKLELDDLCSNVETLVKAKSNAEKMCRAMEDGMNEHKKHQQDEAQRSIGELS  
SHRAKLLSESAELARRLEEKESLVSQLSRAKVSYKQQAEDLRRQLDEEAKAKSALAHAVQ SARH  
DCDLLREQLEEEQEAKAELQORALSRANA EVSTWRSRYESDGIQRAEELEEAKKKLVQRLQEAEE  
AVEAANAKSSSLEKTKQRLQAEMEDLMVDLERSNAASAALDKKQRLFDKTLAEWKQKFEE SQCE  
LEASQKEARSLSTELFKLKNAYEECLEHLETMKRENKNLQEEISELSEQLGEGGRSAHELEKAR  
KQLEQERAELQAALEEAEGSLEHEESKILQSQLELNQVKADVERKLSEKDEEMEQAQRNYQVRL  
DSLQASLESETRSRNEALRVKKKMESDLNEMEIQLSQANRQAAEGQKQVRS LQASLKDLOTQLD  
EAHANQDSRENAALLERRHNLQAELEEVRAALEQMDRSRKLAEQELSEASERVQLLHAQNTS  
LINQKKKHEADLLQLQAEAEAEAVQEERNAEEKAKKAINDAAVMAEELKKEQD TCAHLERMKRN  
EQTIKDLQORLDEAEQVAMKGGKKQLHKLEARIKELEAELEAEQRRGTESTKGIRKYERRIKEL

AYQSQEDRKNLGRLOELVDKLLQKVKSYKRAGEEAEAEAAAANAALRKLQHQLEAEERADMAE  
AQAGKLLKARSRD-----

UPI0000D9E163\_M\_mulatta

SDTETEVEFGIAAPFLRKSEKERIEAQNPFDKTYCFVVDSSKEEYAKGKIKSSQDGKVTVETED  
NRTLTVVKPEDVYAMNPPKFDRIEDMAMLTHLNEPAVLYNLKDRYTSWMIYVSKG-  
FCRASPLYKFIPKHKHIIKAYRGKKRQEAPPHIFSI SDNAYQFMLTDRENQSILITGESGAGK  
TVNTRKVIQYFATIAATGDLAKKKDS---  
GTLEDQIISANPLLEAFGNAKTVRNDNSSRFGKFIRIHFGTTGKLASADIETYLLEKSRVTFQL  
KAERSYHIFYQILSNKKPELIELLLITNPNYDYPFISQGEILVASIDDAAEELLATDSADIDILGF  
TPEEKSGLYKLTGAVMHYGNMFKQKQREEQAEPDGTVEVADKTAYLMGLNSSDLLKALCFPRVK  
VGNEYVTKGQTVDQVHHAVNALS KSVYEKLF LWMVTRINQQLDTKLPRQHFIVGLDIAGFEIFE  
YNSLEQLCINFTNEKLOQFFNHMFVLEQEEYKKEGIEWTFIDFGMDLAACIELIEKPMGIFSI  
LEEECMFPKATDTSFKNKLYDQHLGKSNFQKPKVVKGRAEAHFSLIHYAGTVDYSVSGWLEKN  
KDPLNETVVGLYQKSSNRLLAHLYATFATAD---KKK-

VAKKKGSSFQTVSALFRENLNKLSNLRTTHPHFVRCIIPNETKTPGAMEHSLVLHQLRNCGVL  
EGIRICRKGFPNRIYLGDFKQRYRVLNASAIPEGQFIDSKKACEKLLASIDIDHTQYKFGHTKV  
FFKAGLLGTLEEMRDDRLARLITRTQAVCRGFLMRVEFQKMQRRRESIFCIQYNIRSFMNVKHW  
PWMKLFKIKPLLKSAETEKEMATMKEEFQKTKDELAKSEAKRKELEEKLVTLVQEKNDLQLOV  
QAESENLLDAEERCQLIKAKFQLEAKIKEVTERAEDEEINAELTAKKRKLEDECSELKKDID  
DLELTLAKVEKEKHATENKVKNLTELGLDETI AKLTREKKALQEAHQALDDLQAEEDKVNS  
LNKTKSKLEQQVEDLESSLEQEKLRVDLERNKRKLEGLKLAQESILDLENDKQQDLERLKKK  
DFEYCQLQSKVEDEQTLGLQFQKKIKELQARIEELEEIEAERATRAKTEKQRSYARELEELS  
ERLEEAGGVSTSTQIELNKKREAEFLKLRDLLEATLQHEAMVATLRKKHADSV AELGEQIDNLQ  
RVKQKLEKEKSEFKLEIDDLSSSMESVSKSKANLEKICRMLEDQLSEARGKNEEIQRSLSELTT  
QKSRLQTEAGELSRQLEEKESIVS QLSRSKQAF TQQIEELKRQLEENKAKNALAHALQSSRH  
CDLLREQYEEEQEGKAELQRALSKANSEVAQWR TKYETDAIQRT EEEAKKLAQRLQDSEEQ  
VEAVNAKCASLEKTKQRLQGEVEDLMVDVERANSLAAALDKKQRNFDKVLAEWKTKCEESQAE  
EASLKESRSLSTELFKLNAYEEALDQLETVKRENKNLEQEIADLTEQIAENGKTIHELEKSRK  
QIELEKSDIQLALEEAEAALEHEEAKILRIQLELTQVKSEIDRKIAEKDEEIEQLKRN YQRTVE  
TMQSALDAEVRSRNEAIRLKKKMEGDLNEIEIQLSHANRQAAETLKHLSVQGGQLKDTQLHLDD  
ALRGQEDLKEQLAIVERRANLLQAEVEELRATLEQTERARKLAEQELLD SNERVQLLHTQNTSL  
IHTKKKLETDLMLQLOSEVEDASRDARNAEEKAKKAITDAAMMAEELKKEQDTSAHLERMKKNLE  
QTVKDLQHRLDEAEQLALKGKKQIQKLETRI RELEFELEGEQKKNTE SVKGLRKYERRVKELT  
YQSEEDRKNVLRLODLVDKLVQKVKSYKRQAEAEDEQANAH LTKFRKAQHELEAEERADIAES  
QVNLKRAKTRDFTS-----

UPI00015A3FF2\_Danio\_reri

MGDGEMECFGPAAIYLRKTERERIEAQNTPFDAKTAYFVVDADEMYLKGTLSQKEGGKATVKTH  
SGKTVTVKEDEIFPMNPPKFDKIEDMAMMTHLNEPCVLYNLKERYAAWMIYTYSGLFCVTVNPY  
KWLPVYDAIVVAGYRGKKRIEAPPHIFSI SDNAYQFMLTDRENQSVLITGESGAGKTVNTRKVI  
QYFATVVGAMSGAKKQEPVAG-  
GSLEDQIVAANPLLEAYGNAKTVRNDNSSRFGKFIRIHFGTTGKLASADIETYLLEKSRVTFQL  
SAERSYHIFYQLMTGHKPELLEALLITNPNYDYPMISQGEITVKSINDVEEFIATDTAIDILGF  
TADEKIAIYKLTGAVMHGSMKFKQKQREEQAEPDGTVEVADK IAYLMGLNSADMLKALCYPRVK  
VGNEMVTGQTVPQVNNVAVSALCKSVYEKMF LWMVIRINEMLDTKQPRQFFIGVLDIAGFEIFD  
FNSLEQLCINFTNEKLOQFFNHMFVLEQEEYKKEGIEWEFIDFGMDLAACIELIEKPMGIFSI  
LEEECMFPKATDTSFKNKLHDQHLGKCSAFQKPKPAKGKAEAHFSLVHYAGTVDYNIVGWL DKN  
KDPLNDSVVQLYQKSSSLKVLAFLYASGGE--GGGGKK-

GGKKKGGSFQTVSALFRENLGKLMTNLRSTHHPHFVVRCLIPNESKTPGLMENFLVIHQLRRCNGVL  
EGIRICRKGFPSPRILYGDFKQRYKVLNASVIPEGQFIDNKKASEKLLGSIDVDHTQYKFGHTKV  
FFKAGLLGTLEEMRDEKLASLVTMTQALCRGYVMRKEFVKMMERREAIYSIQYNIRSFMNVKHW  
PWMKLYFKIKPLLKSAETEKEMAAMKENYEKMKEDLTAKALAKKKELEEKMVSLLOEKNDLQLOV  
ASEGENLSDAEERCEGLIKSKIQLEAKLKETTERLEDEEEEINAELTAKKRKLEDECESELKKDID  
DLELTLAKVEKEKHATENKVKNLTEEMASQDESIAKLTKEKKALQEAHQQTLDLDDLQAEEDKVNT  
LTKSKSKLEQQVDDLEGSLEQEKKLRMDLERAKRKLEGLDLKLAQESIMDLENDKQQSEEEKIKKK  
DFEISQFLSKIEDEQSLGAQLQKKIKELQARIEELEEIEAERAARAKVEKQORADLSRELEEIS  
ERLEEAGGATAAQIEMNKKREAEFQKLRRDLEESTLQHEATAAALRKKQADSVAELGEQIDNLQ  
RVKQKLEKEKSEYKMEIDDLSSNMEAVAKAKANLEKMCRTLEDQLSEIKTKSDENIRQLNDMNA  
QRARLQOTENGEFSRQLEEKALVSQLTRGKQAYTQQIEELKRHVEEVKAKNALAHAVQSARHD  
CDLLREQFEEEQEAKAELQRGMSKANSEVAQWRTKYETDAIQORTEEELESKKKLAQRLQDAEES  
IEAVNSKCASLEKTKQRLQGEVEDLMI DVERANALANLDKKQRNFDKVLAEWKQKYEEGQAE  
EGAQKEARSLSTEIFKMKNSYEEALDQLETLKRENKNLQOEISDLTEQLGETGKSIHELEKAKK  
TVESEKVEIQTALEEAEGTLEHEESKILRVQLELNQVKSEIDRKLAEKDEEIEQIKRNSQORVLD  
AMQSTLDSEVRSRNDALRVKKKMEGDLNEMEIQLSHANRQAAEAQKQLRNVOGQLKDAQLHLDE  
AVRGQEDMKEQVAMVERRNNLMQAEIEELRAALEQTERGRKVAEQELVDASERVGLLHNSQNTSL  
INTKKKLEADLVQIQGEVDDAVQEARNAEEKAKKAITDAAMMAEELKKEQDTSAHLERMKKNLE  
VTVKDLQHRLEAENLAMKGGKQLOKLESRVRELESEVEAEQRRGADAVKGVKRYERRVKELT  
YQTEEDKKNVTRLQDLVDKLLQKVKAYKRQAEAEQANTHLSRYRKVQHEMEEAQERADIAES  
QVNLRAKSRDAGKKTQHEE

B1AR69\_Mus\_musculus\_Myos -

SDAEMAI FGEAAPYLRLKPEKERIEAQNRPFDSKKACFAVDDKEMYVKGMIQSRENDKVIVKTL  
DRELTLSNDQVFPMPNPPFKFKIEDMAMMTHLHEPAVLYNLKERYAAWMIYTYSGLFCVTVNPK  
WLPVYNPEVVAAYRGKKRQEAPPHIFSIDNAYQFMLTDRDNQSILITGESGAGKTVNTRKVIQ  
YFATIAVTGDKKKEQPG--  
GTLEDQIIQANPLLEAFGNAKTVRNDNSSRFGKFIRIHFQATGKLASADIETYLLEKSRVTFQL  
SSERSYHIFYQIMSNKKPELIDLLLSTNPFDFPFVSQGEVTVASIDDSEELLATDNAIDILGF  
SPEEKVGIYKLTGAVMHYGNMFKFKQKQREEQAE PDGTEVADKAGYLMGLNSAEMLKGLCCPRVK  
VGNEYVTKGQNVQVTVNSVGALAKAVYEKMFVLMVTRINQQLDTKQPRQYFIGVLDIAGFEIFD  
FNSLEQLCINFTNEKLOQFFNHMFVLEQEEYKKEGIEWEFIDFGMDLAACIELIEKPMGIFSI  
LEEECMFPKATDTSFKNKLYDQHLGKSNNFQPKPPTKGKAEAHFSLVHYAGTVDYNIAGWLDKN  
KDPLNETVVGLYQKSSSLKLLSFLFSNYAGAE---GKK-  
GGKKKGGSSFQTVSAVRENLNKLMTNLRSTHHPHFVVRCLIPNETKTPGVMHDHYLVMHQLRRCNGVL  
EGIRICRKGFPSPRILYADFKQRYRILNASAIPEGQFIDSKNASEKLLNSIDVDREQFRFGHTKV  
FFKAGLLGLLEEMRDEKLVTLMTTRTQAVCRGYLMRVEFKMMERRESIFCIQYNVRSFMNVKHW  
PWMNLFFKIKPLLKSAEAEKEMATMKEDFERAKEDLARSEARRKELEEKMVSLLOEKNDLQLOV  
QSETENLMDAEERCEGLIKSKIQLEAKVKELNERLEEEEMNSELVAKKRNLKDCSSLRKRDID  
DLELTLTKVEKEKHATENKVKNLSEEMTALEETISKLTKEKKSLOEAHQQTLDLDDLQVEEDKVNG  
LIKINVKLEQQTDDLEGSLEQEKKLRADLERVVRKLEGLDKMSQESIMDLENDTQQLEEKLKKK  
EFEMSQLOTRIDDEQVLSLQLOKIKELQARTEELEEIEAEHTVRAKIEKQORSDLARELEEIS  
ERLEEASGATSAQIEMNKKRESEFQKLRRDLEEATLQHEATAATLRKKHADTVAEELGEQIDNLQ  
RVKQKLEKEKSELKMEIDDMASNIETVSKSKSNMERMCRSVEDQFNEIKAKDDQQTQLIHDLNM  
QKARLQOTQNGELSHQVEEKESLVSQLTSSKQALTQQLEELKRQLEEEETKAKNALAHALQSSRH  
CDLLREQYEEEQEGKAEQALRALSKANSEVAQWRTKYETDAIQORTEEELEAKKKLAQRLQEAEEEN  
TEASNSKCASLEKTKQRLQGEVDDLMLDLERANTACATLDKKQRNFDKVLAEWKQKLDESQAE  
EAAQKESRSLSTEIFKMRNAYEEVVDQLETLRRENKNLQEEISDLTEQIAETGKNLQVEKTKK



QVEQEKS<sup>DL</sup>QAAL<sup>EE</sup>VEGSLEHEESKILRVQLELSQVKSELDRKVTEKDEEIEQIKRNSQRAVE  
AMQSVLDAEIRSRNDALRLKKKMEGDLNEMEIQLSHANRQVAETQKHLRTVQGQLKDSQLHLDD  
AQRSNEDLKEQLAIVERRNGLLQEELEEMKVALEQTERTRRLSEQELLDSSDRVQLLHSQNTSL  
INTKKKLEADLAQCQAEVENS IQESRNAEEKAKKAITDAAMMAEELKKEQD TSAHLERMKKNLE  
QTVKDLQHRLDEAEQLALKGGKKQIQKLEARVRELESELDAEQKRGAEALKGAHKYERKVKEMT  
YQAEEDRKNILRLQDLVDKLOAKVKS YKRQAEAEAEQANTQLSRCRRVQHELEEEAEERADIAES  
QVNKLRAKSRDVGGQKMEE-

A8R0Q4\_H\_molitrax\_Myosi -

GDPEMECFGPAAIYLRKPEKERLEAQNTPFDAKTAYFVAEPKEMYLKGVLKSREGGKATVQTLG  
GKTITVKEDDIFSMNPPKFDKIEDMPMMTHLNEPTVLYNLKERYAAWMIYTYSGLFCVTVNPNYK  
WLPVYDSVVVTAYRGKKRIEAPPHIFSI SDNAYQFMLTDRENQSILITGESGAGKTVNTRKVIQ  
YFATI<sup>AV</sup>-SGQKKVEPAAG-

GSLEDQIIAANPLLEAYGNAKTVRNDN<sup>SS</sup>RFGKFIRIHFGTTGKLASADIETYLLKSRVTFQL  
SAERSYHIFYQLCTGHKPELLEALLITTPYDYPMISHGEITVKSINDVEEFVATD<sup>TA</sup>IDILGF  
TAEKMG<sup>I</sup>YKLTGAVMHG<sup>N</sup>MKFKQKQREEQAE<sup>PD</sup>GTEVADK<sup>I</sup>AYLMGLNSADMLKALCFPRVK  
VGNEYVTKGQTV<sup>P</sup>QV<sup>NA</sup>AMALCKSVYEK<sup>M</sup>F<sup>L</sup>W<sup>M</sup>V<sup>R</sup>INEMLDTKQPRQYFIGVLDIAGFEIFD  
YNSLEQLCINFTNEKLQ<sup>Q</sup>FFNH<sup>H</sup>MFVLEQEEYKKEGIEWEFIDFGMDLAACIELIEKPMGIFSI  
LEEECMFPKATGMTLKNKLHDQHLGKTPCFQKPKPVKGKAEAHFSLVHYAGTVDYNITGWLDKN  
KDPLNDSVVQLYQKSSMKLLAHL<sup>Y</sup>AAAS---AESGKK-

GGKKKGGSFQTVSALFRENLGKLM<sup>T</sup>NLRSTHPHFV<sup>R</sup>CLIPNESKTPGLMENFLVIHQ<sup>L</sup>R<sup>C</sup>NGVL  
GGIRICRKGFP<sup>S</sup>RILY<sup>G</sup>DFKQRYKVLNASVIPEGXFIDNKKASEKLLG<sup>S</sup>IDVDHSQYKFGHTKV  
FFKAGLLGTLEEMRDEKL<sup>V</sup>ILVTMTQALCRGYVMRKEFVKMMERREAIYSIQYNVRSFMNVKHW  
P<sup>W</sup>M<sup>K</sup>LYFKIKPLLSAETEKEMAAMKENFEKMKEDLAKALAKKKELEEK<sup>M</sup>V<sup>S</sup>LLQEKNDLQ<sup>L</sup>QV  
AAETENLSDAEERCEGLIKSKIQLEAKLKETTERLEDEEEINAELTAKKRKLEDECESELKKDID  
DLELTLAKVEKEKHATENKVKNL<sup>TE</sup>EMTSQDEAIVKLTKEKKALQEAHQ<sup>Q</sup>TLDDLQAEEDKVNT  
LTKAKAKLEQ<sup>Q</sup>VDDLEDSLEQEKKLRMDLERAKR<sup>K</sup>LEGDFKLSQESIMDLENDKQ<sup>Q</sup>LEEK<sup>L</sup>KKK  
DFESSQLLSRIEDEQSLGIQLQKKIKELQARIEE<sup>LE</sup>EEIEAERAARAKVEKQRS<sup>D</sup>LARELEEIS  
ERLEEAGGATSAQIEMNKKREAEFQKLRRDLEESTLQHEATAAALRKKQADTVAELGEQIDNLQ  
RVKQKLEKEKSEYKMEIDDLSSNMEAVAKSKGNLEKMCRTLEDQ<sup>L</sup>SELRTKHDEHVRHINDLSA  
QKARFQ<sup>T</sup>ENGEMGRQLEEKALVSQ<sup>L</sup>TRSKQAYTQ<sup>Q</sup>IEELKRQIEEEVKAKNALAHAVQSSRH  
CDLLREQYEEEQEAKSELQRSMSKANSEVAQWR<sup>AK</sup>YETDAIQ<sup>R</sup>TEELEEA<sup>K</sup>RKLAQRLQDAEES  
IEAVNAKCASLEKTKQRLQNEVEDLMI<sup>D</sup>VERANALANLDKKQRNFDKVLAEWKQKYEESQAE  
EGSLKETRSLSTELFKMKNSYEEALDQ<sup>LE</sup>TLKRENKNLQ<sup>Q</sup>EISDLTEQLGETGKTIHELEKGGK  
TAEIEKSEIQAALEEA<sup>E</sup>ATLEHEESKILRVQLELNQVKGEIDRKLAEKDEEIEQIKRNSQRIID  
SMQTTLDAE<sup>V</sup>RSRNDALRIKKKMEGDLNEMEIQLSHANRQAVEAQKQLRN<sup>V</sup>QGQLKDAQLHLDE  
ALRAQEDMREQVAMVERRNNLMQAEIEELRVALEQTERGRKVAEQELVDASERV<sup>T</sup>LLHSQNTSL  
INTKKKLEADLVQIQGEMEDVVQESRNADEKAKKAITDAAMMAEELKKEQD TSAHLERMKKNLD  
ITVKDLQHRLDEAESLAKGGKKQLQKLEARVRELESEVEAEQRRSADAVKGV<sup>R</sup>KYERRVKELT  
YQTEEDKKNIRLQDLVDKLOKLVKAYKRQSEDAEEQANTHLTRFRKVQHELEEAQERADIAES  
QVNKLRAKSRELG-----

UPI0000D9E161\_M\_mulatta -

SDAEMAI<sup>F</sup>G<sup>E</sup>AAPYL<sup>R</sup>KPEKERIEAQNRPFDSKKACFVADDKEMYVKGM<sup>I</sup>QSRENDKVI<sup>V</sup>KTLD  
DRTLT<sup>L</sup>NNDQV<sup>F</sup>PMNPPKFDKIEDMAMMTHLHEPAVLYNLKERYAAWMIYTYSGLFCVTVNPNYK  
WLPVYNPEVVAAYRGKKRQEAPPHIFSI SDNAYQFMLTDRDNQSILITGESGAGKTVNTRKVIQ  
YFATI<sup>AV</sup>TGDKKKETQPG--

GTLEDQIIQANPLLEAFGNAKTVRNDN<sup>SS</sup>RFGKFIRIHFGATGKLASADIETYLLKSRVTFQL  
SSERSYHIFYQILSNKKPELIDLLL<sup>I</sup>STNPFDFPFVSQGEVTVASIDDSEELLATDNAIDILGF

SSEEKVGIYKLTGAVMHYGNMKFKQKQREEQAE PDGTEVADKAGYLMGLNSAEMLKGLCCPRVK  
VGNEYVTKGQNVQVTVNSV GALAKAVYEKMF LWMVTRINQQLDTKQPRQYFIGVLDIAGFEIFD  
FNSLEQLCINFTNEKLQQFFNHMHFVLEQEEYKKEGIEWEFIDFGMDLAACIELIEKPMGIFSI  
LEEECMFPKATDTSFKNKLYDQHLGKSNNFQKPKPAKGKPEAHFSLVHYAGTVDYNIAGWLDKN  
KDPLNETVVGLYQKSSSLKLLSFLFSNYAGAD---SKK-  
GGKKKGSFQTVSAVFRENLNKLMTNLRSTHPPHVRCLIPNETKTPGVMHDHYLVMHQLRRCNGVL  
EGIRICRKGFPSPRILYADFKQRYRILNASAIPEGQFIDSKNASEKLLNSIDVDREQFRFGNTKV  
FFKAGLLGLLEEMRDEKLVTLMTTRTQAVCRGYLMRVEFKMMERRDSIFCIQYNIRSF MNVKHW  
PWMNLFFKIKPLLSAEAEKEMATMKEDFERTKEELARSEARRKELEEKMVSLLQEKNDLQLOV  
QSETENLMDAEEERCEGLIKSKILLEAKVKELTERLEEEEDMNSSELVAKRNLKEDKCCSLKRDID  
DLELTLTKVEKEKHATENKVKNLSEEMTALEENISKLTKEKKSLOEAHQOTLDDLQVEEDKVNG  
LIKINAKLEQQTDDLEGSLEQEKLRADLERAKRKLEGLKMSQESIMDLENDKQQIEEKLKKK  
EFEISQLQAKIDDEQVHSWQFQKMKELQARIEELEEIEAEHTLRKAKIEKQRSDLARELEEIS  
ERLEEASGATSAQIEMNKKREAEFQKMRRDLEEATLQHEATAATLRKKHADSV AELGEQIDNLQ  
RVKQKLEKEKSELKMEIDDMASNIEAISKSKSNIERTCRTVEDQFSEIKAKDEQQTQLIHDLNM  
QKARLOTQNGELSHQVEEKESLISQLTKSKQALTQOLEELKRQMEETKAKNALAHALQSSRH  
CDLLREQYEEEQEAKAELQRVLSKANSEVAQWRTKYETDAIQRTTEELEEAKKKLAQRLQEAEEEN  
TETANSK CASLEKTKQRLQGEVDDLMLDLERSHTACATLDKKQRNFDKVLAEWKQKLDESQAE  
EAAQKESRSLSTELFKMRNAYEEVVDQLETLRRENKNLQEEISDLTEQIAETGKNLQVEVEKTKK  
LVEQEKS DLQVALEEV EGSLEHEESKILRVQLELSQVKSELDRKVIEKDEEIEQLKRNSQRATE  
AMQSVLDAEIRSRNDALRVKKKMEGDLNEMEIQLGHSNRQVAETQKHLRTVQGQLKDSQLHLDD  
ALRSNEDLKEQLAIVERRNGLLLEELEEMKVALEQTERTRRLSEQELLDASDRVQLLHSONMSL  
INTKKKLEADIAQCQAEVENS IQESRNAEEKAKKAITDAAMMAEELKKEQDTSAHLERMKKNLE  
QTVKDLQHRLDEAEQLALKGKKQIQKLENRVRELENE LDVEQKRGAEALKGAKYERKVKEMT  
YQADEDRKNILRLQDLVDKLOAKVKS YKRQAEAEQANTQLSRCRRVQHELEEEAERADIAES  
QVNKLRAKSRDVGQKMEE-

UPI0001761474\_Danio\_reri

MGDGECECFGPAAIYLRKPERERIEAQNTPFDAKTAYFVVDADEMYLKGTLOSKEGGKATVKTH  
SGKTVTVKEDIIFPMNPPKFDKIEDMAMMTHLNEPAVLYNLKERYAAWMIYTYSGLFCVTVNPNY  
KWLPVYDSVVVTGYRGKKRIEAPPHIFSIDSNAYQFMLTDRENQSILITGESGAGKTVNTKRVI  
QYFATIAVSGGAKKQEPVPG-

GSLEDQIIAANPLLEAYGNAKTVRNDNSSRFGKFI RIHFATTGKLASADIETYLLEKSRVTFQL  
SAERSYHIFYQLMTGHKPELLEALLITTNPFDYPMISQGEVTVKSINDVEEFIATDIDAIDILGF  
TAEKIAIYKLTGAVMHYGNMKFKQKQREEQAE PDGTEVADKIA YLMGLNSADMLKALCYPRVK  
VGNEMVTKGQTVPQVNNASALCKSVYEKMF LWMVVRINEMLDTKQPRQFFIGVLDIAGFEIFD  
YNSLEQLCINFTNEKLQQFFNHMHFVLEQEEYKKEGIEWEFIDFGMDLAACIELIEKPMGIFSI  
LEEECMFPKATDTSFKNKLHDQHLGKSSAFQKPKPAKGKAEAHFSLVHYAGTVDYNIAGWLDKN  
KDPLNDSVVQLYQKSSVKLLSFLYAAAGA---GGGGK-

GGKKKGSFQTVSALFRENLGKLMTNLRSTHPPHVRCLIPNESKTPGLMENFLVIHQLRRCNGVL  
EGIRICRKGFPSPRILYGDYDFKQRYKVLNASVIPEGQFIDNKKASEKLLGSDVDHTQYKFGHTKV  
FFKAGLLGTLEEMRDEKLATLVMTQALCRGFV MRKEFVKMMERREAIYSIQYNIRSF MNVKHW  
PWMKLYFKIKPLLSAEATEKEMAAMKENFEKMKEDLT KALAKKKELEEKMVSLLQEKNDLQLOV  
ASESENLSDAEEERCEGLIKSKIQLAKLKETTERLEDEEINAELTAKKRKLEDECESELKKDID  
DLELTLAKVEKEKHATENKVKNLTEEMASQDESIAKLTKEKKALQEAHQOTLDDLQAEEDKVNT  
LTKSKSKLEQQVDDLEGSLEQEKLRMDLERAKRKLEGLKLAQESIMDLENDKQQOSEEKIKKK  
DFEISQFLSKIEDEQSLGAQLQKKIKELQARIEELEEIEAERAARAKVEKQRADLSRELEEIS  
ERLEEAGGATAAQIEMNKKREAEFQKLRRLDEESTLQHEATAAALRKKQADSVAELGEQIDNLQ

RVKQKLEKEKSEYKMEIDDLSSNMEAVAKAKANLEKMCRTLEDQLSEIKTKSDENIRQLNDMNA  
QRARLQ TENGEFSRQLEEEKEALVSQLTRGKQAYTQQIEELKRHVEEEVKAKNALAHAVQSARHD  
CDLLREQFEEEEQEAKAELQRGMSKANSEVAQWRTKYETDAIQRTTEELEESKKKLAQRLQDAEES  
IEAVNSK CASLEKTKQRLQGEVEDLMI DVERANALANLDKKQRNFDKVLAEWKQKYEEGQAE  
EGAQKEARSLSTEIFKMKNSYEEALDQLETLKRENKNLQOEISDLTEQLGETGKSIHELEKAKK  
TVESEKVEIQTALEEAEGTLEHEESKILRVQLELNQVKSEIDRKLAEKDEEIEQIKRNSQRVMD  
SMQSTLDSEIRSRNDALRVKKKMEGDLNEMEIQLSHANRQAEEAQKQLRNVQGLKDAQLHLDE  
AIRGQEDMKEQVAMVERNNLMQAEIEELRAALEQTERGRKVAEQELVDASERVGLLHSQNTSL  
INANMILEP DVVHIPVQVEDSVQEARNAEEKAKKAITDAAMMAEELKKEQD TSAHLERMKKNLE  
VTVKDLQHRLEAENLAMKGGKKQLQKLESRVRELESEVEAEQRRGADAVKGVRYERRVKELT  
YQTEEDKKNVTRLQDLVDKQLQKVKAYKRQAEAEQANTHLSRYRKVQHEMEEAQERADIAES  
QVNKLRAKSRDVG-----

Q9GJP9\_0\_\_cuniculus\_Skel

SDAEMAI FGEAAPYLKPEKERIEAQNRPFDSKACFAVDDKEMYVKGMIQSRENDKVTVKTLTLD  
DRTLTLNSDQVFPMPNPPKFDKIEDMAMMTHLHEPAVLYNLKERYAAWMIYTYSGLFCVTVNPNYK  
WLPVYNPEVVTA YRGKKRQEAPPHIFSI SDNAYQFMLTDRDNQSILITGESGAGKTVNTRKVIQ  
YFATIAVTGDKKKEQQPG--

GTLEDQIIQANPLLEAFGNAKTVRNDNSSRFGKFIIRIHFGATGKLASADIETYILLEKSRVTFQL  
SSERSYHIFYQIMSNNKPELIDLLLISTNPFDFPFVVSQGEVTVASIDDSEELLATDNAIDILGF  
SSEEKVGIYKLTGAVMHYGNMFKQKQREEQAE PDGTEVADKAGYLMGLNSAEMKGLCCPRVK  
VGNEYVTKGQNVQVTVNSV GALAKAVYEKMF LWMVTRINQQLDTKQPRQYFIGVLDIAGFEIFD  
FNSLEQLCINFTNEKLQQFFNHMFVLEQEEYKKEGIEWEFIDFGMDLAACIELIEKPMGIFSI  
LEEECMFPKATDTSFKNKLYDQHLGKSNNFQKPKPAKGKAEAHFSLVHYAGTVDYNIAGWLDKN  
KDPLNETVVGLYQKSALKLLSFLFSNYAGAE---SKK-

GGKKKGS SFQTVSAVFRENLNKLMNTLRSTHPHFVRCLIPNETKTPGVM DHYLVMHQLRCNGVL  
EGIRICRKGFP SRILYADFKQRYRILNASAIPEGQFIDSKNASEKLLNSIDVDREQYRFGHTKV  
FFKAGLLGLLEEMRDEKLVTLMTRTQALCRGYLMRVEFKKMMERRDSIFCIQYNIRAFMNVKHW  
PWMNLFFKIKPLLKSAEAEKEMATMKEDFERAKEELARSEARRKELEEKMVTLLQEKNDLQLOV  
QSETENLMDAEEERCEGLIKSKIQLEAKVKELNERLEEEEMNSDLVAKKRTLEDKCCSLKRDID  
DLELTLTKVEKEKHATENKVKNLSEEMTALEENISKLTKEKKSLOEAHQQTLDLQVEEDKVNG  
LIKINAKLEQQTDDLEGSLEQEKLRADLERVVRKLEGLKMAQESIMDLENDKQOVEEKLKKK  
EFEISQLQTKIDDEQVQSLQLQKKIKELQARTEELEEEIEAEHTLRKIEKQRSDLARELEEIS  
ERLEEASGATSAQIEMNKKREAEFQKLRRDLEEATLQHEATAATLRKKHADSVAELGEQIDNLQ  
RVKQKLEKEKSELKMEIDDLASNIETVSKSKSNVERMCRSVEDQFNEIKAKDDQQTQLIHDLNM  
QKARLQQTQNGELNHQVEEKESLISQLTKGKQALSQQLEEVKRQLEEE TKAKNALAHALQSSRHD  
CDLLREQYEEEEQEAKAELQRALSKANSEVAQWRTKYETDAIQRTTEELEEA KKKLAQRLQEA EEN  
TETANSK CASLEKTKQRLQGEVDDLMLDLERANTACGTL DKKQRNFDKVLAEWKQKLDESQAE  
EAAQKESRALSTEIFKMRNAYEEVVEQLETLRRENKNLQEEIADLTEQMAETGKNLQVEKTKK  
QVEQEKS DLQAAL EEAEGSLEHEESKILRVQLELNQVKSELDRKLTEKDEEMEQLKRNSQRAAE  
ALQSVLDAEIRSRNDALRLKKKMEGDLNEMEIQLGHASRQVAETQKHLRTVQGLKDSQLHLDD  
ALRSNEDLKEQLAMVERRNGLLQEELEEMKVALEQTERTRRLSEQELLDASDRVQLLHSQNTSL  
INTKRKLEADLAQCQAEVENSLQESRNAEEKAKKAITDAAMMAEELKKEQD TSAHLERMKKNLE  
QTVKDLQHRLEAEEQLALKGGKKQIQKLENRVRELETELD AEQKRGAEALKGAHKYERKVKEMT  
YQAEEDRKNFLRLQDLVDKLOAKVKS YKRQAEAEQANTQLSRCRRVQHELEEEAEERADIAES  
QVNKLRAKSRDVG GQKMEE-

UPI00015A3FB7\_Danio\_reri

MGDGEMECFGPAAIYLRKPERERIEAQNTPFDKATAYFVVDADEMYLKGTLSKEGGKATVKTH

SGKTVTVKEDIIFPMNPPKFDKIEDMAMMTHLNEPAVLYNLKERYAAWMIYTYSGLFCVTVNPNY  
KWLPVYDSVVVTGYRGKKRIEAPPHIFSI SDNAYQFMLTDRENQSILITGESGAGKTVNTRKVI  
QYFATIAVSGGAKNL-----

GSLEDQIIAANPLLEAYGNAKTVRNDNSSRFGKFIRIHFATTGKLASADIETYLLEKSRVTFQL  
SAERSYHIFYQLMTGHKPELLEALLITNPFDPYPMISQGEVTVKSINDVEEFATDTAIDILGF  
TAEKIAIYKLTGAVMHGGMKFKQKQREEQAEPDGTEVADKIAAYLMGLNSADMLKALCYPRVK  
VGNEMVTKGQTVPQVNNASALCKSVYEKMFVLMVVRINEMLDTKQPRQFFIGVLDIAGFEIFD  
YNSLEQLCINFTNEKLQQFFNHMFVLEQEEYKKEGIEWEFIDFGMDLAACIELIEKPMGIFSI  
LEEECMFPKATDTSFKNKLDQHLGKSSAFQKPKPAKGKAEAHFSLVHYAGTVDYNIVGWLKDN  
KDPLNDSVVQLYQKSSVKLLSFLYAAAGA--GGGK--

GGKKKGSFQTVSALFRENLGKLMNLRSTHHPFVRCLIPNESKTPGLMENFLVIHQLRNGLV  
EGIRICRKGFPSTRILYGDFKQRYKVLNASVIPEGQFIDNKKASEKLLGSIDVDHTQYKFGHTKV  
FFKAGLLGTLEEMRDEKLTALVTMTQALCRGFVMRKEFVKMMERREAIYSIQYNIRSFMNVKHW  
PWMKLYFKIKPLLSAETEKEMAAMKENFEKMKEDLTALAKKKELEEKMVSLLOEKNDLQLOV  
ASESENLSDAEERCEGLIKSKIQLEAKKETTTERLEDEEEINAELTAKKRKLEDECESELKDDID  
DLELTLAKVEKEKHATENKVKNLTEEMASQDESI AKLTKEKKALQEAHQOTLDDLQAEEDKVNT  
LTKSKSKLEQQVDDLEGSLEQEKLRMDLERAKRKLKLEGDLKLAQESIMDLENDKQQSEEKIKKK  
DFEISQFLSKIEDEQSLGAQLQKKIKELQARIEELEEIEAERAARAKVEKQRADLSRELEEIS  
ERLEEAGGATAAQIEMNKKREAEFQKLRDLLEESTLQHEATAAALRKKQADSVAEELGEQIDNLQ  
RVKQKLEKEKSEYKMEIDDLSSNMEAVAKAKANLEKMCRTLEDQLSEIKTKSDENIRQLNDMNA  
QRARLQTENGEFSRQLEEKALVSQLTRGKQAYTQQIEELKRHVVEEVKAKNALAHAVQSARHD  
CDLLREQFEEQEAELQRGMSKANSEVAQWRTKYETDAIQRTEELEESKKKLAQRLQDAEES  
IEAVNSKCASLEKTKQRLQGEVEDLMI DVERANALANLDKKQRNFDKVLAEWKQKYEEGQAE  
EGAQKEARSLSTEIFKMKNSYEEALDQLETLKRENKNLQOEISDLTEQLGETGKSIHELEKAKK  
TVESEKVEIQTALEEAEGTLEHEESKILRVQLELNQVKSEIDRKLAEKDEEIEQIKRNSQRVMD  
SMQSTLDSEIRSRNDALRVKKKMEGDLNEMEIQLSHANRQAAEAQKQLRNVQGLKDAQLHLDE  
AIRGQEDMKEQVAMVERNNLMQAEIEELRAALEQTERGRKVAEQELVDASERVGLLHSQNTSL  
INANMILEPDVVHIPVQVEDSVQEARNAEEKAKKAITDAAMMAEELKKEQDTSAHLERMKKNLE  
VTVKDLQHRLDEAENLAMKGGKKQLQKLESRVRELESEVEAEQRRGADAVKGVRYERRVKELT  
YQTEEDKKNVTRLQDLVDKQLKVKAYKRQAEAEQANTHLSRYRQVHEMEEAQERADIAES  
QVNLKRAKSRDVG-----

UPI000DA3582\_R\_norvegi --

DAEMAI FGEEAAPYLRKPEKERIEAQNRPFDSSKACFAVDDKEMYVKGMIQSRENDKVIKTLDD  
RELTLNSDQVFPMPNPPKFDKIEDMAMMTHLHEPAVLYNLKERYAAWMIYTYSGLFCVTVNPNYKW  
LPVYNPEVVTAYRGKKRQEAPPHIFSI SDNAYQFMLTDRDNQSILITGESGAGKTVNTRKVIQY  
FATIAVTGEEKKEQQPG--

GTLEDQIIQANPLLEAFGNAKTVRNDNSSRFGKFIRIHFATGKLASADIETYLLEKSRVTFQL  
SSERSYHIFYQIMSNNKPELIDLLIISTNPFDFPFVSQGEVTVASIDDSEELLATDNAIDILGF  
SPEEKVGIYKLTGAVMHYGNMFKQKQREEQAEPDGTEVADKAGYLMGLNSAEMLKGLCCPRVK  
VGNEYVTKGQNVQVTVNSV GALAKAVYEKMFVLMVTRINQQLDTKQPRQYFIGVLDIAGFEIFD  
FNSLEQLCINFTNEKLQQFFNHMFVLEQEEYKKEGIEWEFIDFGMDLAACIELIEKPMGIFSI  
LEEECMFPKATDTSFKNKLYDQHLGKSNFQKPKPAKGKAEAHFSLVHYAGTVDYNIAAGWLKDN  
KDPLNETVVGLYQKSSLKLLSFLFSNYAGAE---GKK--

GGKKKGSFQTVSAVRENLNKLMNLRSTHHPFVRCLIPNETKTPGVMHDHYLVMHQLRNGLV  
EGIRICRKGFPSTRILYADFKQRYRILNASAIPEGQFIDSKNASEKLLNSIDVDREQFRFGHTKV  
FFKAGLLGLLEEMRDEKLVTLMTRTQAVCRGYLMRVEFKMMERREAIFCIQYNVRSFMNVKHW  
PWMNLFFKIKPLLSAEAEKEMATMKEDFERAKEELARSEARRKELEEKMVSLLOEKNDLQLOV

QSETENLMDAEERCEGLIKSKIQLEAKVKELNERLEEEEEETNSELVAKKRNLEDKCSSLKRDI  
DLELTLTKVEKEKHATENKVKNLSEEMTALEETISKLTKEKKSLOEAHQQTLDLQVEEDKVNG  
LMKINVKLEQQTDLEGSLEQEKKLRADLERVVRKLEGLKMSQESIMDLENDAAQLEEKLKKK  
EFEMSQLOTRIDDEQILSLQLOKKIKELQARTEEELEEEIEAEHTVRAKIEKQRSDLARELEEIS  
ERLEEASGATSAQIEMNKKREAEFQKLRRDLEEATLQHEATAATLRKKHADTVAEELGEQIDNLQ  
RVKQKLEKEKSELKMEIDDMASNIEAVSKSKSNMERMCRSVEDQFNEIKAKDDQQTQLIHDLNM  
QKARLQQTONGELNHQVEEKESLVSQLTQSKQALTOQLEELKRQLEEEETKAKNALAHALQSSRHD  
CDLLREQYEEEQEGKAELOQALSKANSEVAQWRKYETDAIQORTEEELEAKKKLAQRLQEAEEEN  
TEASNSKCASLEKTKQRLQGEVDDLMLDLEKANTACATLDKKQRNFDKVLAEWKQKLDESQAE  
EAAQKESRSLSTEIFKMRNAYEEVVDQLETLRRENKNLQEEISDLTEQIAETGKNLQVEEKT  
QMEQEKSDLQAALVEEGSLEHEESKILRVQLELSQVKSELDRKVTEKDEEIEQIKRNSQRAVE  
AMQSVLDAEIRSRNDALRLKKKMEGDLNEMEIQLSHANRQVAETQKHLRTVQGLKDSQLHLDD  
AQRSNEDLKEQLAIVERRNGLLQEELEEMKVALEQTERTRRLSEQELLDSSDRVQLLHSQNTSL  
INTKKKLEADLAQCQAEVENSIQESRNAEEKAKKAITDAAMMAEELKKEQDTS AHLERMKKNLE  
QTVKDLQHRLEAEQLALGGKKQIQKLEARVRELESELDAEQKRGAEALGAKHYERKVKEMT  
YQAEEDRKNILRLQDLVDKLOAKVKSQYKQAEAEQANTQLSRCRRVQHELEEEAEERADIAES  
QVNKLRAKSRDVGGQKMEE-

B8A569\_Danio\_rerio\_Novel --

DAEMAVYGKAAIYLRKPEKERIEAQNKPFDAKTACYVVDDKELYVKGTIKSRDGGKVTVITLTK  
EERVAKEDDVHPMNPPKFDKIEDMAMMTHLNEPSVLYNLKERYAAWMIYTYSGLFCATVNPYKW  
LPVYDAEVVAAYRGKKRMEAPPHIFSVSDNAYQFMLTDRENQSVLITGESGAGKTVNTKRVIQY  
FATVAVQGPEKKKEQAAG-

GSLEDQIIAANPLLEAYGNAKTVRNDNSSRFGKFIRIHFGTSGKLASADIETYLLKSRVTFQL  
PDERGYHIFYQMMTNHKPELIEMTLITNPNYDFPMCSQGQITVASIDDEELVATDIDAIDILGF  
NAEEKMGIYKFTGAVLHHGNMFKKQKQREEQAE PDGTEEADKIAYLLGLNSADMLKALCYPRVK  
VGNEFVTKGQTPVQVYNSVSALS KSIYERMFLWMVIRINQMLDTKQQRNFFIGVLDIAGFEIFD  
FNSMEQLCINF TNEKLOQFFNHMFVLEQEEYKKEGIVWEFIDFGMDLAACIELIEKPLGIFSI  
LEEECMFPKATDTSFKNKLYDQHLGKCNFAQKPKPAKGKAEAHFSLVHYAGTVDYNISGWL DKN  
KDPLNESVQLYQKSSVKLLATLYPPVE---TGGGKK-

GGKKKGGSMQTVSSQFRENLGKLMTNLRSTHPHFVRCLIPNESKTPGLMENFLVIHQLRNGLV  
EGIRICRKGFP SRILYGD FQRYKVLNASVIPEGQFIDNKKASEKLLGSIDVNHDEYRFGHTKV  
FFKAGLLGTLEEMRDEKLASLVMTQALCRAYLMRREFVKMMERRESIYTIQYNIRSF MNVKHW  
PWMKVYYKIKPLLKSAETEKELATMKEDFVKCKEALAKAEAKKKELEEKMVALLOEKNDLQ LAV  
ASESENLSDAEERCEGLIKSKIQLEAKLKETTERLEDEEEINAELTAKKRKLEDECSELKKDID  
DLELTLAKVEKEKHATENKVKNLTEEMAAQDESIGKLTKEKKALQEAHQQTLDLQAEEDKVNT  
LTKSKTKLEQQVDDLEGSLEQEKKLRMDLERAKRKLEGLKLAQESIMDLENDKQQSEEK LKKK  
DFETSQLLSKIEDEQSLGAQLQKKIKELQARIEELEEIEAERAARAKVEKQ RADLSRELEEIS  
ERLEEAGGATAAQIEMNKKREAEFQKLRRDLEESTLQHEATAAALRKKQADSVAEELGEQIDNLQ  
RVKQKLEKEKSEYKMEIDDLSSNMEAVAKAKANLEKMCRTLEDQLSEIKSKNDENIRQINDLSA  
QRARLQQTENGEFGRQLEEKALVSQLTRGKQAF TQQIEELKRQIEEEV KAKNALAHAVQSARHD  
CDLLREQFEEEQEAKAELOQGM SKANSEVAQWRKYETDAIQORTEEELESKKKLAQRLQEAEEQ  
IEAVNSKCASLEKTKQRLQGEVEDLMI DVERANALANLDKKQRNFDKVLAEWKQKYEEGQAE  
EGAQKEARSLSTELFKMKN SYEETLDQLETLKRENKNLQEEISDLTEQLGETGKS IHELEKSKK  
AVETEKAEIQTALEEAEGTLEHEESKILRVQLELNQVKSEIDRKLAEKDEEIEQIKRNSQRVTE  
SMQSTLDSEVRSRNDALRIKKKMEGDLNEMEIQLSHANRQAAEAQKQLRNVAQLKDAQLHLDD  
AVRGQEDMKEQVAMVERRNTLMQSEIEELRAALEQTERGRKVAEQELVDASERVGLLHSQNTSL  
LNTKKKLEADLVQIQSEVEDTVQEARNAEEKAKKAITDAAMMAEELKKEQDTS AHLERMKKNLE

ITVKDLQHRLDEAENLAMKGGKKQLQKLESRVRELETEIEAEQRRGADAVKGVRYERRVKELT  
YQTEEDKKNVNRQLQDLVDKQLQKVKAYKRQSEEAEEQANSHLSKLRKVQHELEEAERADIAES  
QVNKLRAKSRDAG-----

Q05K05\_O\_latipes\_Fast\_s --

DAEMEAYGPAAIYLRKPEKERIEAQAAPFDKTAAYFVAEPEEMYLKGLIKREGGKATVETVTG  
KTLTVKEEDIHPMNPPKFDKIEDMAMMTHLNEPAVLNPKERFASWMIYTYSGLFCVVVNPYKW  
LPVYDAQVFNAYRGKKRIEAPPHIFSI SDNAYQFMLTDRENQSILITGESGAGKTVNTKRVIQY  
FATIAV-AGGKKSEGSSG-

GSLEDQIIAANPLLEAYGNAKTVRNDNSSRFGKFIRIHFSTGKGLASADIETYLLKSRVTFQL  
SAERSYHIFYQLMTGHKPELLEALLITNPNYDYPMISQGEITVKSINDVEEFIATDTAIDILGF  
SAEEKMGIYKLTGAVMHGHNMKFKQKQREEQAEPDGTEVADKIAAYLMGLNSADMLKALCYPRVK  
VGNEMVTKGQTVPVQVNAVSAKCSVYKMFVLMVIRINEMLDTKQPRQFFIGVLDIAGFEIFD  
YNSLEQLCINFTNEKLOQFFNHMFVLEQEEYKKEGIEWEFIDFGMDLAACIELIEKPMGIFSI  
LEEECMFPKATDTSFKNKLHDQHLGKTKAFKPKPAKGAEAHFALVHYAGTVDYNITGWLDKN  
KDPLNDSVVQLYQKSSNKLLCYLYAAAGA---

GGAKKGGGKGGKGGSFQTVSALFRENLGKLMTNLRSTHHPFVRCLIPNESKTPGLMENFLVIHQ  
RCNGVLEGIRICRKGFPSTRILYGDFKQRYKVLNASVIPEGQFIDNKKASEKLLGSIDVDHSQYK  
FGHTKVVFFKAGLLGTLEEMRDEKLAELVTMTQALCRGFLMRKEFVKMMERRDAIFTIQYNVRSF  
MNVKNWPWLKLYFKIKPLLKSAETEKELEQEMKGNYEKMKTDLAAALAKKKELEEKMVSLLOEKN  
DLQQLQVAAETENLSDAEERCEGLIKSKIQLAKLLETTERLEDEEEINAELTAKKRKLEDECSE  
LKKDIDDLELTLAKVEKEKHATENKVKNLTEEMASQDESI AKLTKEKKALQEAHQQTLDLQAE  
EDKVNTLTKAKTKLEQQVDDLEGSLEQEKKIRMDLERAKRKLEGLDLKLAQESIMDLENDKQQSD  
EKIKKKDFEISQLLSKIEDEQSLGAQLQKKIKELQARIEELEEEIEAERAARAKVEKQRADLSR  
ELEEISERLEEAGGATAAQIEMNKKREAEFQKLRDLEESTLQHEATAALRKKQADSVAEELGE  
QIDNLQRVKQKLEKEKSEYKMEIDDLSSNMEAVAKSKGNLEKMCRTLEDQLSLAKKNDENVRQ  
LNDINVQKARLQTENGEFARQLEEKALVSQLTRGKQAFQQTQIEELKRHVVEEVKAKNALAHAV  
QSARHDCDLLREQFEEEQEAKAELQRGMSKANSEVAQWRKYETDAIQRTEELEESKKKLAQRL  
QEAEESIEAVNSKASLEKTKQRLQGEVEDLMIDVERANSLAANLDDKKQRNFDKVLAEWKQKYE  
ESQAELEGAQKEARSLSTELFKMKNSEYEAALDQLETMKRENKNLQQEISDLTEQI GENGKSIHE  
LEKAKKTVENEKIELQTALEEAEGTLEHEESKILRVQLELNQVKGEIDRKLAEKDEEMEQIKRN  
SQRVIESMQSTLDAEVRSRNDALRVKKKMEGDLNEMEQLSHANRQAAEAQKQLRNVQGLKDA  
QLHLDDALRGQEDMKEQVAMVERRNGLMLAEIEELRAALEQTERGRKVAEQELVDASERVALLH  
SQNTSLNLTAKKLEADVFVQGEVDDAVQEARNAEEKAKKAITDAAMMAEELKKEQDTSSHLER  
MKKNLEVTVKDLQHRLDEAENLAMKGGKKQLQKLESRVRELEAEVETEQRGADAVKGVRYERR  
RVKELTYQTEEDKKNVSRQLQDLVDKQLQKVKAYKRQAEAEAEQANTHMARLRKVQHELEEAQER  
ADIAETQVNKLRAKSRDIG-----

Q9UKX3\_Homo\_sapiens\_Myos -

SDAEMAI FGEAAPYLRKPEKERIEAQNRPFDSKKACFVADNKEMYVKGMIQTRENDKVIIVKTL  
DRMLTLNNDQVFPMPNPPKFDKIEDMAMMTHLHEPAVLNPKERYAAWMIYTYSGLFCVTVNPYK  
WLPVYKPEVVAAYRGKKRQEAPPHIFSI SDNAYQFMLTDRDNQSILITGESGAGKTVNTKRVIQ  
YFATIAVTGDKKKTQPG--

GTLEDQIIQANPLLEAFGNAKTVRNDNSSRFGKFIRIHFSGATGKGLASADIETYLLKSRVTFQL  
SSERSYHIFYQIMSNNKPELIDLLLITNPFDFPFVSQGEVTVASIDDSEELLATDNAIDILGF  
SSEEKVGIYKLTGAVMHYGNMKFKQKQREEQAEPDGTEVADKAGYLMGLNSAEMKGLCCPRVK  
VGNEYVTKGQNVQVTVNSV GALAKAVYKMFVLMVTRINQQLDTKQPRQYFIVGLDIAGFEIFD  
FNSLEQLCINFTNEKLOQFFNHMFVLEQEEYKKEGIEWEFIDFGMDLAACIELIEKPMGIFSI  
LEEECMFPKATDTSFKNKLYDQHLGKSNFQKPKPAKGAEAHFSLVHYAGTVDYNIAGWLDKN

KDPLNETVVGLYQKSSSLKLLSFLFSNYAGAE---SKK-  
GGKKKGSSFQTVSAVFRENLNKLMTNLRSTHPPHVRCLIPNETKTPGVMHDHYLVMHQLRRCNGVL  
EGIRICRKGFPSPRILYADFKQRYRILNASAIPEGQFIDSKNASEKLLNSIDVDREQFRFGNTKV  
FFKAGLLGLLEEMRDEKLVTLMTSTQAVCRGYLMRVEFKMMERRDSIFCIQYNIRSFMNVKHW  
PWMNLFFKIKPLLSAEAEKEMATMKEDFERTKEELARSEARRKELEEKMVSLLQEKNDLQLOV  
QSETENLMDAEERCEGLIKSKILLEAKVKELTERLEEEEMNSELVAKRNLEDKCSSLKRKRDID  
DLELTLTKVEKEKHATENKVKNLSEEMTALEENISKLTKEKKSLOEAHQQTLDLQVEEDKVNG  
LIKINAKLEQQTDLEGSLEQEKLRADLERAKRKLEGLKMSQESIMDLENEKQQIEEKLKKK  
EFELSOLQARIDDEQVHSLQFQKKIKELQARIEELEEIEAEHTLRKIEKQSRDLARELEEIS  
ERLEEASGATSAQIEMNKKREAEFQKMRRDLEEATLQHEATAATLRKKQADSVAELGEQIDNLQ  
RVKQKLEKEKSELKMEIDDMASNIEALSXSXSNIERTCRTVEDQFSEIKAKDEQQTQLIHDLNM  
QKARLQQTNGELSHRVEEKESLISQLTKSKQALTQQLEELKRQMEETKAKNAMAHALQSSRH  
CDLLREQYEEEQEAKAELQRALSKANSEVAQWTKYETDAIQRTTEELEEKKLAQRLQEAEEK  
TETANSKCSLEKTKQRLQGEVEDLMRDLEERSHTACATLDKKQRNFDKVLAEWKQKLDESQAE  
EAAQKESRSLSTELFKMRNAYEEVVDQLETLRRENKNLQEEISDLTEQIAETGKNLQEAETKK  
LVEQEKSDLOVALEEVEGSLEHEESKILRVQLELSQVKSELDRKVIKDEEIEQLKRNSQRAAE  
ALQSVLDAEIRSRNDALRLKKKMEGDLNEMEIQLGHSNRQMAETQRHLRTVQGQLKDSQLHLDD  
ALRSNEDLKEQLAIVERRNGLLLEELEEMKVALEQTERTRRLSEQELLDASDRVQLLHSQNTSL  
INTKKKLEADIAQCQAEVENSIQESRNAEEKAKKAITDAAMMAEELKKEQDTSAHLERMKKNL  
QTVKDLQHRLEAEQLALKGGKKQIQKLENRVRELENELDVEQKRGAEALKGAHKYERKVKEMT  
YQAEEDRKNILRLQDLVDKLOAKVKS YKRQAEAEQANTQLSRCRRVQHELEEEAERADIAES  
QVNKLRAKSRDVGSQKMEE-

UPI00015A7E7F\_Danio\_eri --

DAEMAIYGKAAIFLRKPEKERIEAQSKPFDKACTACYVVDKELYVKGTIKSKDGGKVTVVTLTQ  
T-

KVVKEDDVHPMNPPKFDKIEDMAMMTHLNEPSVLYNLKERYAAWMIYTYSGLFCATVNPYKWL  
VYDAEVVAAYRGKRMEEAPPHIFSVSDNAYQFMLTDRENQSVLITGESGAGKTVNTRKVIQYFA  
TVAVQGGDKKKEQAAG-

GSLEDQIIAANPLLEAYGNAKTVRNDNSSRFGKFIIRIHFGTSGKLASADIETYLLKSRVTFQL  
PDERGYHIFYQMMTNHKPELIEMTLITNPNYDFPMCSQGITVASIDDKEELVATDTAIDILGF  
TGEEKMGIYKFTGAVLHHGNMFKQKQREEQAE PDGTEADKIA YLLGLNSADMLKALCYPRVK  
VGNEFVTKGQTVPQVYNSVSALSXS IYERMFLWMVIRINQMLDTKQQRNFFIGVLDIAGFEIFD  
FNSMEQLCINFTNEKLQQFFNHMFVLEQEEYKKEGIVWEFIDFGMDLAACIELIEKPLGIFSI  
LEEECMFPKATDTSFKNKLYDQHLGKCNAFQKPKPAKGKAEAHFSLVHYAGTVDYNISGWLDKN  
KDPLNESVVQLYQKSSVKKLLATLYPPVEG--TGGGK-

GGKKKGSMQTVSSQFRENLGKLMTNLRSTHPPHVRCLIPNESKTPGLMENFLVIHQLRRCNGVL  
EGIRICRKGFPSPRILYGDFKQRYKVLNASVIPEGQFIDNKKASEKLLGSIDVNHDEYRFGHTKV  
FFKAGLLGTLEEMRDEKLATLVMTQALCRAYLMRREFVKMMERRRESIYTIQYNIRSFMNVKHW  
PVMKVVYKIKPLLSAETEKELATMKEDFVKCKEALAKAEAKKKELEEKMVALLQEKNDLQAV  
ASESENLSDAEERCEGLIKSKIQLAKLKETTERLEDEEEINAELTAKKRKLEDECSSELKKDID  
DLELTLAKVEKEKHATENKVKNLTEEMASQDESIAKLTKEKKALQEAHQQTLDLQAEEDKVNT  
LTKSKTKLEQQVDDLEGSLEQEKLRMDLERAKRKLEGLKLAQESIMDLENDKQQSEEKIKK  
DFETAQLLSKIEDEQSLGAQLQKKIKELQARIEELEEIEAERAARAKVEKQRADLSRELEEIS  
ERLEEAGGATAAQIEMNKKREAEFQKLRRDLEESTLQHEATAAALRKKQADSVAELGEQIDNLQ  
RVKQKLEKEKSEYKMEIDDLSSNMEAVAKAKANLEKMCRTVEDQLSEIKSKNDENLRQINDLSA  
QRARLQQTENGEFGRQLEEKALVSQLTRGKQAFQTQQIEELKRQIEEEVKAKNALAHAVQSARHD  
CDLLREQFEEEQEAKAELQRGMSKANSEVAQWRKYETDAIQRTTEELEESKKKLAQRLQEAEEQ

IEAVNSKCASLEKTKQRLQGEVEDLMI DVERANALANLDDKKQRNFDKVLAEWKQKYEEGQAELEGAQKEARSLSTELFKMKNSEYETLDQLETLKRENKNLQOEISDLTEQLGETGKSIHELEKAKKTVETEKAIEIQTALEEAEGTLEHEESKILRVQLELNQVKGEIDRKLAEKDEEMEQIKRNSQRVTEAMQSTLDSEVRSRNDALRIKKKMEGDLNEMEIQLSHANRQAAEAQKQLRNVQAQLKDAQLHLDDAVRGQEDMKEQVAMVERRNTLMQSEIEELRAALEQTERGRKVAEQELVDASERVGLLHLSQNTSLNNTKKKLETDLVQIQSEVEDTVQEARNAEEKAKKAITDAAMMAEELKKEQDTS AHLERMKKNLEVTVKDLQHRLDEAENLAMKGGKKQLQKLESRVRELESEVEAEQRRGADAVKGVRYERRVKELTYQTEEDKKNVNRLQDLVDKLLQKVKAYKRQSEEAEEQANSHLSKLRKVQHELEEAERADIAESQVNKLRAKSRDAG-----

UPI0000EBDD42\_Bos\_taurus

-

SDAEMAI FGEAAPYLKSEKERIEAQNRPFDSKKACFAVDDKELYVKGMIOGRENDKVTVKTLD DRTLTLNSEQVFPMPKFDKIEDMAMMTHLHEPAVLYNLKERYAAWMIYTYSGLFCVTVNPKYK WLPVYNPEVVAAYRGKKRQEAPPHIFSI SDNAYQFMLTDRDNQSILITGESGAGKTVNTRKVIQYFATI AVTGDKKKEQQPG--

GTLEDQIIQANPLLEAFGNAKTVRNDNSSRFGKFIRIHFHFGATGKLASADIETYLLKSRVTFQLSSERSYHIFYQIMSNNKPELIDLLLSTNPFDFPFVSQGEVTVASIDDSEELLATDNAIDILGFSSEEKVGIIYKLTGAVMHYGNMFKKQKQREEQAE PDGTEVADKAGYLMGLNSAEMKGLCCPRVKVGNEYVTKGQNVQVTVNSV GALAKAVYEKMF LWMVTRINQQLDTKQPRQYFIGVLDIAGFEIFDFNSLEQLCINFTNEKLOQFFNHMFVLEQEEYKKEGIEWEFIDFGMDLAACIELIEKPMGIFSLIEEEMF PKATDTSFKNKLYDQHLGKSNFQKPKPAKGKAEAHFSLVHYAGTVDYNIAGWLDKNKDPLNETVVGLYQKSSLKLLSFLFSNYAGAE---SKK-

GGKKKGSSSFQTVSAVFRENLNKLMTNLRSTHPPHVRCLIPNETKTPGVMDHHLVLHQLRRCNGVLEGIRICRKGFP SRILYGD FQRYRILNASAIPEGQFIDSKNASEKLLNSIDVDREQYRFGHTKVF FFKAGLLGLLEEMRDEKLVTLMTRTQALCRGYLMRVEFKMMERRDSIFCIQYNIRSF MNVKHW PWNMLFFKIKPLLSAEAEKEIATMKEDFERAKEELARSEARRKELEEKMVSLLQEKNDLQLOVQTETENLMDAEERCEGLIKSKIQLEAKVKELNERLEEEEMNSELVAKKRNLKDCSSLRKRDID DLELTLTKVEKEKHATENKVKNLSEEMTALEENISKLTREKKSLOETHQOTLDDLQVEEDKVNGLIKINAKLEQQTDDLEGCLEQEKLRADLERAKRKLKLDLQESIMDLENDKQOMEEKLQKDFEISQLQTKIEDKQVHSLQLQKKIKELQARTEEELEEEVEAEHTLRGKIEKQRADLSRELEEISERLEEASGATSVQIEMNKKREAEFQKLLRDLEEATLQHEATTTTLRKKHADSVAE LGEQIDNLQ RVKQKLEKEKSELKMEIDDMASNIETVSKSKSNVERMCR TVEDQFNEIKAKDDQQTQLIHDLNM QKARLQQTONGELSHQVEEKAALISQLTKGKQVLTQQLEDLKRQLEEEETKAKSALAHALKSARHDCDLLREQYEEEQEGKAE LQRAMSKANSEVAQWR TKYETDAIQRT EELEEA KKKLAQRLQEA EEN TEAASSK CASLEKTKQRLQGEVDDLMLDLERANTACACLDKKQRNFDKVI SEWKQKLDESQAELEAAQKESRSHSTEVFKMRNAYEEVVDQLETLRRENKNLQEEISDLTMQIAETNKNLQVEVEKTKKQAEQEKSDLQAALEEEVEGSLEHEESKILHVQLELNQVKSELDRRLTEKDEEIEQLKRSSQRAAEAMQSILDAEIRSRNDALRLKKKMEGDLNEMEIQLGHSNRQMAETQKHLRSVQGQLKDSQLHLDDALRSNEDLKEQLAMVERRNGLLQEELEEMKVALEQTERTRKLSEQELLDASNRMQLLHLSQNTSLINTKKKLEADIAQCQAEVENS IQESKNAEEKAKKAITDAAMMAEELKKEQDTS AHLERMKKNLEQTVKDLQHRLDEAEQLALKGGKKQIHKLENRVRELESELDAEQKRGAEALKGAHRYERKVKEMTYQAEEDRKNILRLQDLVDKLLQAKVKAYKRQAEAEQANTQLSRCRRVQHELQEAERADIAESQVNKLRAKSRDVG AQKMEE-

Q508P7\_Danio\_rerio\_Fast\_

--

DAEMAVYGKAAIYLRKPEKERIETQNKPFDAKSACYVVDDKELYVKGTIKSKDGGKVTVITLTK EERVVKEDDVHPMPKPKYDKIEDMAMMTHLNEPSVLYNLKERYAAWMIYTYSGLFCATVNPYKWL PVYDAEVVAAYRGKKRMEAPPHIFSVSDNAYQFMLTDRENQSVLITGESGAGKTVNTRKVIQYFATVAVQGGDKKKEQAPG-



GSLEDQIIAANPLLEAYGNAKTVRNDNSSRFGKFIRIHFGTTGKLASADIETYLLLEKSRVTFQL  
PDERGYHIFYQMMTNHKPELIEMTLITTNPYDFPMCSQGQITVASIDDKEELMATDSAIDILGF  
TGEEKMGIYKFTGAVLHHGNMFKQKQREEQAEPDGTEEADKISYLLGLNSAELLKALCYPRVK  
VGNEFVTKGQTPVQVYNSVSALSXSIEYKMFVWVIRINQMLDTKQQRNFFIGVLDIAGFEIFD  
FNSMEQLCINFTEKLOQFFNHMFVLEQEEYKKEGIVWEFIDFGMDLAACIELIEKPMGIFSI  
LEEECMFPKATDVSFKNKLYDQHLGKCNFAFQKPRPQKGAEAHFSLVHYAGTVDYNVNGWLDKN  
KDPLNESVQVLYQKSSVKLLATLYPPVE---TGGGKK-

GGKKKGGSMQTVSSQFRENLGKLMTNLRSTHPPHVRCLIPNESKTPGLMENFLVIHQLRNGLV  
EGIRICRKGFPSTRILYGDFKQRYKVLNASVIPEGQFIDNKKASEKLLGSIDVNHDEYRFGHTKV  
FFKAGLLGTLEEMRDEKLATLVMTQALCRAYLMRREFVKMMERRESIYTIQYNI RSFMNVKHW  
PWMKVYYKIKPLLKSAETEKELATMKEDFVKCKEDLVKAEAKKKELEEKMVALLQEKNDLQAV  
ASEAENLSDAEERCEGLIKSKIQLEAKKLETTERLEDEEEINAELTAKKRKLEDECSELKKDID  
DLELTLAKVEKEKHATENKVKNLTEEMASQDESIAKLTKEKKALQEAHQQTLDLQAEEDKVNT  
LTKSKTKLEQQVDDLEGSLEQEKLRMDLERAKRKLEGLKLAQESIMDLENDKQQSSEKIKKK  
DFETAQLLSKIEDEQSLGAQLQKKIKELQARIEELEEIEAERAARAKVEKQORADLSRELEEIS  
ERLEEAGGATAAQIEMNKKREAEFQKLRDLEESTLQHEATAAALRKKQADSVAELGEQIDNLQ  
RVKQKLEKEKSEYKMEIDDLSSNMEAVAKAKANLEKMCRTVEDQLSEIKSKNDENLRQINDLSA  
QRARLQTENGEFGRQLEEEKEALVSQLTRGKQAFQTQQIEELKRQIEEEVKAKNALAHAVQSARHD  
CDLLREQFEEEQEAKAELQRGMSKANSEVAQWRTKYETDAIQORTEELEESKKKLAQRLQEAEEQ  
IEAVNSKCASLEKTKQRLQGEVEDLMI DVERANALANLDKKQRNFDKVLAEWKQKYEEGQAE  
EGAQKEARSLSTELFKMKNSEYETLDQLETLKRENKNLQOEISDLTEQIGETGKSIHELEKAKK  
TVTEKAEIQTALEEAEGTLEHEESKILRVQLELNQVKGEIDRKLAEKDEEIEQIKRNSQRVTE  
AMQSTLDSEVRSRNDALRIKKKMEGDLNEMEIQLSHANRQAAEAQKQLRNVAQQLKDAQLHLDD  
AVRGQEDMKEQVAMVERRNTLMQSEIEELRAALEQTERGRKVAEQELVDASERVGLLHSQNTSL  
LNTKKKLES DLVQIQGEVEDTVQEARNAEEKAKKAITDAAMMAEELKKEQDTS AHLERMKKNLE  
ITVKDLQHRLDEAENLAMKGGKKQLQKLESRVRELESEVEAEQRRGADAVKGVRYERRVKELT  
YQTEEDKKNINRLQDLVDKQLKVKAYKRQSEEAEEQANSHLSKLRKVQHELEEAERADISES  
QVNLKRAKSRDAG-----

Q6SNT2\_S\_\_chuatsi\_Fast\_s --

DAEMEAYGPAAVYLRKPEKERIEAQASPFDAKTAYFVVDADEMYLKGLVKKKEGGKATVETDTG  
KTVTVKEEDIHPRNPPKYDKIEDMVMTHLNEPCVLYNLKERYASWMIYYSGLFCVVNPNYKW  
LPVYDAVVVGAYRGKKRIEAPPHIFSI SDNAYQFMHTDRENQSVLITGESGAGKTVNTRKVIQY  
FATIAA-IGAKKAEPTPG-

GSLEDQIVAANPLLEAYGNAKTVRNDNSSRFGKFIRIHFGSTGKLASADIETYLLLEKSRVTFQL  
SAERSYHIFYQLMTGHKPELLEALLITTNPYDYPMISQGEITVKSINDVEEFIATDTAIDILGF  
TAEKMGYIKLGTGAVMHHGNMFKQKQREEQAEPDGTEVADKISYLLGLNSADMLKYLALCYPRVK  
VGNEMVTKGQTPVQVNNASALCKSVYEKMFVWVIRIDEMLDTKQARQFYIGVLDIAGFEIFD  
YNSLEQLCINFTEKLOQFFNHMFVLEQEEYKKEGIQWEIFIDFGMDLASCIELIEKPMGIFSI  
LEEECMFPKASDTTFKNKLDQHLGKTKAFKPKPGKGAEAHFSLVHYAGTVDYNITGWLEKN  
KDPLNDSVQVLYQKSSNKLALFLYASGAA---ASGKK-

GGKKKGGSFQTVSAVFRENLGKLMTNLRSTHPPHVRCLIPNESKTPGLMENFLVIHQLRNGLV  
EGIRICRKGFPSTRILYGDFKQRYKVLNASVIPEGQFMDNKKASEKLLGSIDVDHTQYMFHTKV  
FFKAGLLGALEEMRDEKLAALVTMTQALCRGYVMRKEFVKMMERRESIYSIQYNI RSFMNVKNW  
PWLKLYFKIKPLLKSAETEKELSOMKENYDKMKTDLATALAKKKELEEKMVSLQEKNDLQVQV  
ASEVENLSDAEERCEGLIKSKIQLEAKKLETTERLEDEEEINAELTAKKRKLEDECSELKKDID  
DLELTLAKVEKEKHATENKVKNLTEEMASQDESIAKLTKEKKALQEAHQQTLDLQAEEDKVNT  
LTKAKTKLEQQVDDLEGSLEQEKLRMDLERAKRKLEGLKLAQESIMDLENDKQQSDEKIKKK

EFETSQLLSKIEDEQSLGAQLQKKIKELQARIEELEEIEAERAARAKVEKQRADLSRELEEIS  
ERLEEAGGATAAQIEMNKKREAEFQKLRRDLEEATLQHEATASALRKKQADSVAELGEQIDNLQ  
RVKQKLEKEKSEYKMEIDDLSSNMEAVAKAKGNLEKMCRTLEDQFSELKSKNDETVRQLNDINA  
QKARLQTENGEYSRQLEEEKEALVSQLTRGKQAFQTQQIEEFKRHVEEVKAKNALAHAVQSARHD  
CDLLREQFEEEQEAKAELQRGMSKANSEVAQWRISKYETDAIQRTTEELEEAKKKLAQRLQDAEES  
IEAVNSKCASLEKTKQRLQGEVEDLMI DVERANALANLDKKQRNFDKVLAEWKQKYEEGQAE  
EGAQKEARSLSTELFKMKNSYEESLDQLETKRENKNLQOEISDLTEQIGETGKSIHELEKAKK  
TVETEKTEIQSALEEAEGTLEHEEAKILRVQLELNQIKGEVDRKLAEKDEEMEQIKRNSQVRMD  
SMQSALDSEVRSRNDALRVKKKMEGDLNEMEIQLSHANRQAAEAQKQLRNVQGLKDAQLHLDD  
AVRGQEDMKEQVAMVERRNGLMLAEIEELRVALEQTERGRKVAEQELVDASERVGLLHSONTSL  
MNTKKKLEADLVQVQGEVEDSVQEARNAEEKAKKAITDAAMMAEELKKEQDTSSHLERMKKNLE  
VTVKDLQHRLEAENLAMKGGKKQLQKLESRVRELEAEVDAEQRRGADAVKGVKRYERRVKELT  
YQTEEDKKNVRLQDLVDKQLKVKAYKRQAAEEAEQANTHMSRLRKVQHEMEEAQERADIAES  
QVNLKRAKSRDAGKTDIAE-

B8A561\_Danio\_rerio\_Novel --

DAEMAVYGKAAIYLRKPEKERIEAQNKPFDAKTACYVVDDKELYVKGTIKSRDGGKVTVITLTK  
EERVAKEDDVHPMPPKFDKIEDMAMMTHLNEPSVLYNLKERYAAWMIYTYSGLFCATVNPYKW  
LPVYDAEVVAAYRGKKRMEAPPHIFSVSDNAYQFMLTDRENQSVLITGESGAGKTVNTRKVIQY  
FATVAVQGPEKKKEQAAG-

GSLEDQIIAANPLLEAYGNAKTVRNDNSSRFGKFIRIHFGTSGKLASADIETYLLEKSRVTFQL  
PDERGYHIFYQMMTNHKPELIEMTLITTPYDFPMCSQGQITVASIDDKELVATDTAIDILGF  
NNEEKMGYKFTGAVLHHGNMKFKQKQREEQAE PDGTEEADKIGYLLGLNSADMLKALCYPRVK  
VGNEFVTKGQTVPVYNSVSALSISYERMFLWMVVRINQMLDTKQQRNFFIGVLDIAGFEIFD  
FNSMEQLCINFTNEKLQQFFNHMFVLEQEEYKKEGIVWEFIDFGMDLAACIELIEKPLGIFSI  
LEEECMFPKATDTSFKNKLYDQHLGKCNFAQKPKPAKGKAEAHFSLVHYAGTVDYNISGWLDKN  
KDPLNESVVQLYQKSSVLLATLYPPVE---TGGGKK-

GGKKKGGSMQTVSSQFRENLGKLMTNLRSTHPHFVRCLIPNESKTPGLMENFLVIHQLRONGVL  
EGIRICRKGFPSTRILYADFKQRYKVLNASVIPEGQFIDNKKASEKLLGSDVNHDEYRFGHTKV  
FFKAGLLGTLEEMRDEKLASLVMTQALCRAYLMRREFVKMTERDAIYTIQYNVRSFMNVKHW  
PVMKVVYKIKPLLKSAETEKELATMKEDFVKCKEDLAKAEAKKKELEEKMVALLQEKNDLQAV  
ASESENLSDAEERCEGLIKSKIQLEAKLKETTERLEDEEEINAELTAKKRKLEDECESELKKDID  
DLELTLAKVEKEKHATENKVKNLTEEMAAQDESIGKLTKEKKALQEAHQQTLDLQAEEDKVNT  
LTKSKTKLEQQVDDLEGSLEQEKKLRMDLERAKRKLEGLKLAQESIMDLENDKQQSEKLLKK  
DFETSQLLSKIEDEQSLGAQLQKKIKELQARIEELEEIEAERAARAKVEKQRADLSRELEEIS  
ERLEEAGGATAAQIEMNKKREAEFQKLRRDLEESTLQHEATAAALRKKQADSVAELGEQIDNLQ  
RVKQKLEKEKSEYKMEIDDLSSNMEAVAKAKANLEKMCRTLEDQFSELKSKNDEENLRQLNDLSA  
QRARLQTENGEFGRQLEEEKEALVSQLTRGKQAFQTQQIEELKRQIEEEVKAKNALAHAVQSARHD  
CDLLREQFEEEQEAKAELQRGMSKANSEVAQWRISKYETDAIQRTTEELEESKKKLAQRLQEAEEQ  
IEAVNSKCASLEKTKQRLQGEVEDLMI DVERANALANLDKKQRNFDKVLAEWKQKYEEGQAE  
EGAQKEARSLSTELFKMKNSYEETLDQLETLKRENKNLQOEISDLTEQIGETGKSIHELEKSKK  
AVETEKAEIQTALEEAEGTLEHEESKILRVQLELNQVKSEIDRKLAEKDEEIEQIKRNSQRITD  
SMQSTLDSEVRSRNDALRIKKKMEGDLNEMEIQLSHANRQAAEAQKQLRNVQAQLKDAQLHLDD  
AVRGQEDMKEQVAMVERRNTLMQSEIEELRAALEQTERGRKVAEQELVDASERVGLLHSONTSL  
LNTKKKLEADLVQIQSEVEDTVQEARNAEDKAKKAITDAAMMAEELKKEQDTSAHLERMKKNLE  
VTVKDLQHRLEAENLAMKGGKKQLQKLESRVRELESEVEAEQRRGADAVKGVKRYERRVKELT  
YQTEEDKKNVRLQDLVDKQLKVKAYKRQSEEAEEQANSHLSKLRKVQHELEEAERADIAES  
QVNLKRAKSRDSG-----

042352\_C\_carpio\_Myosin

MGDGECECFGPAAIYLRKPERERIEAQTPFDKTAFFVTDAAE MYLKSTLVSREGGKATVKTH  
CGKTVTVKEDI FQMNPPKFDKMEDMAMMTHLNEPSVLFNLKERYAAWMIYTYSGLFCATVNPY  
KWLPVYDAVVVAGYRGKKRIEAPPHIFSI SDNAYQFMLTDRENQSILITGESGAGKTVNTRKVI  
QYFATVAM-SGPKKTEAVPG-

GSLEDQIIAANPLLEAYGNAKTIRNDNSSRFGKFIRIHFGTTGKLAKADIETYLLKSRVTFQL  
SAERSYHIFYQLMTGHKPELLEALLITNPNYDYPMISQGEITVKSIDDVEEFIATDTAIDILGF  
TADEKISYKLTGAVMHGSMKFKQKQREEQAEPDGNEAADKIAYLLGINSADMLKALCYPRVK  
VGNEMVTKGQTVPQVNNAVSALCKSIYEKMFLLWVVRINEMLNTTNPREFYIGVLDIAGFEIFD  
YNSLEQLCINFTNEKLQOQFFNHMTMFVLEQEEYKKEGIEWAFIDFGMDLAACIELIEKPMGIFSI  
LEEECMFPKATDTSFKNKLHDQHLGKSAAFQKPKPAKGPPEAHFSLHYAGTVDYNIAGWLEKN  
KDPLNDSVVQLYQKSALKVLALLYVAPE---EGGGKK-

AGKKKGGSFQTVSALFRENLAKLMTNLRSTHHPFVRCLIPNESKTPGLMENFLVIHQLRNGVL  
EGIRICRKGFPSPRIHYGDFKQRYKILNASVIPEGHFIDNKKATEKLLGSIDVDHTQYKFGHTKV  
FFKAGLLGALEEMRDEKLVNLVTMTQALARGYVMRKEFVKMMERREAFSIOYNI RSFMNVKHW  
PWMKVYFKIKPLLKTAESEKEMASMKENFEKMKEDLTALAKKKELEEKMVSLVQEKNDLLLQV  
TSEENLCDAEERCEGLIKSKIQLEGKLEKTERLEDEEEEINAELTAKKRKLEDECESELKKDID  
DLELTLAKVEKEKHATENKVKNLTEEMACQDESI AKLTKEKKALQEAHQOTLDDLQAEEDKVNT  
LTKAKTKLEQQVDDLEGSLEQEKKLRMDLERVVRKLEGLKLAQESIMDLENEKQQSDEKIKKK  
DFEISQFLSKIEDEQSLGAQLQKKIKELQARIEELEEIEAERSARAKVEKQRADLSRELEEIS  
ERLEEAGGATAAQIEMNKKREADFQKMRRDLEESTLQHEATAAALRKKQADTVAELGEQIDNLQ  
RVKQKLEKEKSEYKMEIDDLTSNMEAVAKAGNLEKMCRTLEDQLSEIKAKSDENSRQLNDMNA  
QRARLQ TENGEFSRQLEEKALVSQLTRGKQAFQTQOIEDLQRHVEEEVKAKNALAHAVQSARHD  
CDLLREQYEEEQEAKTELQRGMSKANSEVAQWRAKYETDAIQRTEELEEAKKKLAQRLQDAEES  
IEAVSSK CASLEKTKQRLQGEVEDLMI DGERANALANLDKKQRNFDKVLAEWKQKYEESQAE  
EAAQKEARSLSTELFKMKNSYEEALDHLET LKRENKNLQOEISDLSEQLGETGKSIHELEKAKK  
IVESEKAEIQTALEEAESTLEHEESKILRVQLELNQVKSEIDRKLAEKDEEIEQIKRNSQRVMD  
SMQSTLDSEIRSRNDALRVKKKMEGDLNEMEVQLSHANRQAAEAQKQLRNVOGQLKDAQHLHDE  
AVRGQEDMKEQVAMVERRNTLMQAEIEELRAALEQTERGRKVAEQELVDASERVGLLHSQNTSL  
INTKKKLETDLLQVQGEVDDAVQEARNAEEKAKKAITDAAMMAEELKKEQDTSAHLERMKKNME  
VTVKDLQHRLEAEASLAMKGGKKQLQKLESRVHELEAEVEAEQRRGADAVKGVKRYERRVKELT  
YQTEEDKKS VTRLQDLVDKLQKLVKAYKRQAEAEQANTHLSRYRKVQHELEESHERADIAES  
QVNKLRAKSREAG-----

UPI0001796E5B\_E\_caballu

SDAEMAI FGEAAPYLKPEKERIEAQNRPFDSKKACFAVDDKELYVKGMISRENDKVTVKTV  
DRTLTLNSDQVFPMPKFDKIEDMAMMTHLHEPAVLYNLKERYAAWMIYTYSGLFCVTVNPYK  
WLPVYNPEVVTA YRGKKRQEAPPHIFSI SDNAYQFMLTDRDNQSILITGESGAGKTVNTRKVIQ  
YFATI AVTGDKKKEQQPG--

GTLEDQIIQANPLLEAFGNAKTVRNDNSSRFGKFIRIHFGSTGKLASADIETYLLKSRVTFQL  
SSERSYHIFYQIMSNKKPELIDLLLISTNPFDFPFMSQGEVTVASIDDSEELLATDNAIDILGF  
SSEEKVG IYKLTGAVMHYGNMKFKQKQREEQAEPDGTEVADKAGYLMGLNSAEMKGLCCPRVK  
VGNEYVTKGQNVQVTVNSV GALAKAVYEKMFLLWVVARINQQLDTKQPRQYFYGVLDIAGFEIFD  
FNSLEQLCINFTNEKLQOQFFNHMFVLEQEEYKKEGIEWEFIDFGMDLAACIELIEKPMGIFSI  
LEEECMFPKATDTSFKNKLVDQHLGKSSNFQKPKPTKGKAEAHFSLIHYAGTVDYNISGWLDKN  
KDPLNETVVGLYQKSSLKLLSFLFSNYAGAE---SKK-

GGKKKGGSFQTVSAVFRENLNKLMNTNLRSTHHPFVRCLIPNETKTPGVMDHHLVLHQLRNGVL  
EGIRICRKGFPSPRIYADFKQRYRILNASAIPEGQFIDSKNASEKLLNSIDVDREQYRFGHTKV

FFKAGLLGLLEEMRDEKLVTLMTRTQALCRGYLMRVEFKKMIERRDSIFCIQYNIRSFMNVKHW  
PWMNLFFKIKPLLSAEAEEREMATMKEDFERAKEELARSEARRKELEEKMVTLLQEKNDLQLOV  
QSETENLMDAEEERCEGLIKSKIQLEAKVKELSERLEEEEEANSELVAKRNLKEDKCSSLKRDI  
DLELTLTKVEKEKHATENKVKNLSEEMTALEGNISKLTKKESLQEAHQOTLDDLQVEEDKVNG  
LIKINAKLEQQTDLEGCLEQEKKLRADLERVRRKLEGLKMCQESIMDLENDKQQAEKLLKK  
EFEICQLQTKIDDEQVLSLQLOKKIKELQARTEEELEEEIEAEHTLRGKIEKQORSDLARELEEIS  
ERLEEASGATSAQIEMNKKREAEFQKLRRDLEEATLQHEATTAALRKKHTDSVAELGEQIDNLQ  
RVKQKLEKEKSELKMEIDDMASNMETVSKSKSNIERMCRTEVEDQFNEIKAKDDQQTQLIHDLNM  
QKARLQQTONGELSHQMEEKESLISQLTKSKQALTQQLEDLKRQLEEEETKAKNALAHALQSSRHD  
CDLLREQYEEEQESKAELQRALSKANSEVAQWRTKYETDAIQRMEELEEAKKKLAQRLQEAEEEN  
TEAVSSKASLEKTKQRLQGEVDDLMLDLERAHTACTTLDKKQRNFDKVLADWKQKLDESKAEL  
EAAQKESRSLSTELFKMRNAYEEVVDQLETLRRENKNLQEEISDLTEQIAETSKNLQEMEKSKK  
QVEQEKSDDLQAALEEAEGSLEHEESKILRVQLELSQVKAELDRKVTEKDEEIEQLKRNSQRAAE  
ATQSMLDAEIRSRNDALRLKKKMEGDLNEMEIQLGHSTRQAGETQKHLRTVQGQLKDSQLHLDD  
ALRSNEDLKEQLAIVERRNGLLLEELEEMKVALEQTERTRRLSEQELLDASDRVQLLHSONTSL  
INTNKKLEADIAQCQAEMENSIQESRNAEEKAKKAITDVAMMAEELKKEQDTSAHLERMKKNLE  
QTVKDLQHRLDEAEQLALKGGKKQIQKLENRVRELENELEDAEQKRGAEALKGAKHYERKVKEMT  
YQAEEDRKNILRLQDLVDKLOAKVKAYKRQAEAEQANMQLSRCRRVQHKLEEAERADIAES  
QVNLRAKSRDVGGQKMEE-

UPI00015A7E8A\_Danio\_reri --

DAEMAVYGKAAIYLRKPEKERIEAQNKPFDAKSACYVVDKELYVKGTIKSRDGGKVTVITLTK  
EERVAKEEDVHPMNPPKFDKIEDMAMMTHLNEPSVLYNLKERYAAWMIYTYSGLFCA TVNPKW  
LPVYDAEVVAAYRGKKRMEAPPHIFSVSDNAYQFMLTDRENQSVLITGESGAGKT VNTKRVIQY  
FATVAVQGGDKKKEQTPG-

GSLEDQIIAANPLLEAYGNAKTVRNDNSSRFGKFIRIHFHTTGKLASADIETYLLEKSRVTFQL  
PDERGYHIFYQMMTNHKPELIEMTLITTNPYDFPMCSQGQITVASIDDKEELVATDTAIDILGF  
TGEEKMGIYKFTGAVLHHGNMFKQKQREEQAE PDGTEEADKISYLLGLNSAEMLKALCYPRVK  
VGNEFVTKGQTVPVYNSVSALSXSIIYERMFLWMVIRINQMLDTKQQRNFFIGVLDIAGFEIFD  
FNSMEQLCINFTNEKLQQFFNHMFVLEQEEYKKEGIVWEFIDFGMDLAACIELIEKPMGIFSI  
LEEECMFPKATDTSFKNKLYDQHLGKCNAFQKPRPQKGAEAHFLVHYAGTVDYNVSGWLDKN  
KDPLNESVVQLYQKSSVKLLATLYPPVE---IDTSKK-

GGKKKGGSMQTVSSQFRENLGKLMNTNRSTHPHFVRCLIPNESKTPGLMENFLVIHQLRNGLV  
EGIRICRKGFP SRILYADFKQRYKVLNASVIPEGQFIDNKKASEKLLGSIDVNHDEYRFGHTKV  
FFKAGLLGTLEEMRDEKLASLVTMTQALCRAYLMRREFVKMMERRESIYTIQYNIRSFMNVKHW  
PVMKVVYKIKPLLSAETEKELANMKEDFVKCKEDLVKAEAKKKELEEKMVALLQEKNDLQ LAV  
ASEAENLSDAEEERCEGLIKSKIQLEAKLKETTERLEDEEEINAELTAKRKLDECESELKKDID  
DLELTLAKVEKEKHATENKVKNLTEEMASQDESI AKLTKEKKALQEAHQOTLDDLQAEEDKVNT  
LTKSKTKLEQQVDDLEGSLEQEKKLRMDLERAKRKLKLAQESIMDLENDKQQSEKIKKK  
DFETSQLLSKIEDEQSLGAQLQKKIKELQARIEELEEIEAERAARAKVEKQRADLSRELEEIS  
ERLEEAGGATAAQIEMNKKREAEFQKLRRDLEESTLQHEATAAALRKKQADSVAELGEQIDNLQ  
RVKQKLEKEKSEYKMEIDDLSSNMEAVAKAKANLEKMCRTLEDQLSEIKSKSDENLRQINDLSA  
QRARLQTENGEFGRQLEEKALVSQLTRGKQAFQTQQIEELKRQIEEEGRAKNALAHAVQSARHD  
CDLLREQFEEEQEAKAELQRGMSKANSEVAQWRTKYETDAIQRTTEELEESKKKLAQRLQEAEEQ  
IEAVNSKASLEKTKQRLQGEVEDLMI DVERANSLAANLDDKKQRNFDKVLAEWKQKYEEGQAE  
EGAQKEARSLSSTELFKMKNSEYETLDQLETLKRENKNLQEEISDLTEQIGETGKSIHELEKAKK  
TVETEKAIEIQTALAAAEGTLEHEESKILRVQLELNQVKGEIDRKLAEKDEEIEQIKRNSQ RVTE  
AMQSTLDSEVRSRNDALRIKKKMEGDLNEMEIQLSHANRQAAEAQKQLRNVQSQLKDAQLHLDD

AVRAQEDMKEQVAMVERRNTLMQSEIEELRAALEQTERGRKVAEQELVDASERVGLLHSQNTSL  
LNTKKKLESDLVQIQSEVEDTVQEARNAEEKAKKAITDAAMMAEELKKEQDTS AHLERMKKNLE  
ITVKDLQHRLDEAENLAMKGGKKQLQKLESRVRELESEIDAEQRRGADAVKGVRYERRVKELT  
YQTEEDKKNINRLQDLVDKLLQKVKAYKRQSEEAEEQANSHLSKLRKVQHELEEAERADISES  
QVNKLRKSRDAG-----

Q90YF6\_P\_\_forsteri\_Myosi --

DAEMEQYGPAAIYLRKSEKERIEAQTA PFDAKTAFVADVDEMYLKGKLA KREGGKATVDTDSG  
KSLTVKEDDIHPRNPPKYDKIEDMAMMTHLNEPCVLYNLKERYASWMIYTYSGLFCVVNPKW  
LPVYDAQVVAAYRGKKRIEAPPHIFSI SDNAYQFMLTDRENQSVLITGESGAGKT VNTKRVIQY  
FATIAA-LGAKKAEPTPG-

GSLEDQIVAANPLLEAYGNAKTVRNDNSSRFGKFIRIHFGTTGKLSSADIETYLLEKSRVTFQL  
SAERSYHIFYQLMTGHKPELLEGLLITTPYDYPMISQGEITVKSINDVEEFATDTAIDILGF  
NAEEKIGIYKLTGAVMHGMMKFKQKQREEQAEPDGTVEADK IAYLLGLNSADMLKALCYPRVK  
VGNEMVTKGQTVPQVNNASALCKSVYEKMFVIRINEMLDTKQPRSYFIGVLDIAGFEIFD  
FNSLEQLCINFTNEKLOQFFNHMFVLEQEEYKKEGIDWEFIDFGMDLAACIELIEKPMGIFSI  
LEEECMFPKASDTTFKNKLHDQHLGKTKAFEKPKPGKGAEAHFALVHYAGTVDYNISGWL DKN  
KDPLNDSVVQLYQKSSNKLLAML YAAAGA----GGKK-

GGKKKGGSFQTVSALFRENLGKLMNTLRSTH PHFVRCLIPNETKTPGLMENFLVIHQ LRCNGVL  
EGIRICRKGFP SRILYGDFKQRYKVLNASVIPEGQFIDNKKASEKLLGSIDVDHTQYKFGHTKV  
FFKAGLLGTLEEMRDDKLATLVMTQALCRGYVMRKEYVKMTERRESIYSIQYNIRSF MNVKNW  
PWLKLYFKIKPLLKSAETEKELQQMKENYDKM TSDLAALAKKKELEEKMVSLLOEKNDLQ LQV  
AAEVENLGDAAERCEGLIKSKIQLEAKKETGERLEDEEEINAELTAKKRKLEDECSQLK KDID  
DLELTLAEVEKEKHATENKVKNLTEEMASQDETVAKLTKEKKALQEAHQOTLDDLQAEEDKVNT  
LTKAKTKLEQQVDDLEGSLEQEKKLRMDLERAKR KLEGDLKLSQESIMDLENDKQQSDEKIKKK  
DFETSQLLSKIEDEQSLGAQLQKKIKELQARIEELEEIEAERAARAKVEKQ RADLSRELEEIS  
ERLEEAGGATAAQIEMNKKREAEFQKLRDL EESTLQHEATASALRKKQADSVAELGQQIDNLQ  
RVKQKLEKEKSEYKMEIDDLSSNMEAVAKAGNLEKMCRTVEDQLSELKAKNDENVRQLNDINA  
QKARLQ TENGEYSRQLEEKEALVSQLTRGKQAF TQQIEELKRHV EEEVKAKNALAHGVQSSRH D  
CDLLREQFEEEQEAKAELQRGMSKANSEVAQWRSKYETDAIQRT EEELEAKKKLAQRLQEA EES  
IEAVNSK CASLEKTKQRLQGEVEDLMI DVERANALANLDKKQRNFDKVLAEWKQKYEEGQAE L  
EGAQKEARSLSTELFKMKNSYEEALDHLETMKRENKNLQQEISDLTEQIGETGKSIHELEKAKK  
TVETEKTEIQSALEEAEGTLEHEEAKILRVQLELNQIKGEVDRKMAEKDEEME QIKRNSQRVID  
SMQSTLDSEVRSRNDALRVKKKMEGDLNEMEIQLSHANRQASEAQKQLRNVQGQLKDAQLHLDD  
AVRGQEDMKEQVAMVERRNGLMMAEIDELRVALEQTERGRKVAEQELVDASERVGLLHSQNTSL  
MNTKKKLEADLVQVQGEVDDTVQEARNAEDKAKKAITDAAMMAEELKKEQDTS AHLERMKKNLE  
VTVKDLQHRLDEAENLAMKGGKKQLQKLESRVRELESEVEAEQRRGADAVKGVRYERRVKELT  
YQTEEDKKNVNRQLQDLVDKLLQKVKSYKRQSEEAEEQANTHMSRLR KVQHELEEAQERADIAES  
QVNKLRKSRRETGKTDLAE-

UPI000175F75C\_Danio\_reri --

DAEMAVYGKAAIYLRKPEKERIEAQNKPFDAKTACYVVDKELYVKGTIKSRDGGKVTVITLTK  
EERVAKEDDVHMPNPPKFDKIEDMAMMTHLNEPSVLYNLKERYAAWMIYTYSGLFCATVNPYKW  
LPVYDAEVVAAYRGKKRMEAPPHIFSVSDNAYQFMLTDRENQSVLITGESGAGKT VNTKRVIQY  
FATVAVQGPEKKKEQAAG-

GSLEDQIIAANPLLEAYGNAKTVRNDNSSRFGKFIRIHFGTSGKLASADIETYLLEKSRVTFQL  
PDERGYHIFYQMMTNHKPELIEMTLITTPYDFPMCSQGQITVASIDDKEELVATDTAIDILGF  
NNEEKMG IYKFTGAVLHHGMMKFKQKQREEQAEPDGTTEEADKIGYLLGLNSADMLKALCYPRVK  
VGNEFVTKGQTVPQVYNSVSALS KSIYERMFLWMVVRINQMLDTKQQRNFFIGVLDIAGFEIFD

FNSMEQLCINFTNEKLOQFFNHMFVLEQEEYKKEGIVWEFIDFGMDLAACIELIEKPLGIFSI  
LEEECMFPKATDTSFKNKLYDQHLGKCNFAFQKPKPAKGKAEAHFSLVHYAGTVDYNISGWLDKN  
KDPLNESVQLYQKSSVKLLATLYPPVE---TGGGKK-  
GGKKKGGSMQTVSSQFRENLGKLMTNLRSTHPIVVRCLIPNESKTPGLMENFLVIHQLRRCNGVL  
EGIRICTRKGFPSTRILYADFKQRYKVLNASVIPEGQFIDNKKASEKLLGSDVNHDEYRFGHTKV  
FFKAGLLGTLEEMRDEKLSLVTMTQALCRAYLMRREFVKMTERDAIYTIQYNVRSFMNVKHW  
PWMKVYYKIKPLLKSAETEKELATMKEDFVKCKEDLAKAEAKKKELEEKMVALLQEKNDLQ LAV  
ASEENLSDAEERCEGLIKSKIQLEAKKLETTERLEDEEEINAELTAKKRKLEDECSELKKDID  
DLELTLAKVEKEKHATENKVKNLTEEMAAQDESIGKLTKEKKALQEAHQQTLDLQAEEDKVNT  
LTKSKTKLEQQVDDLEGSLEQEKKLRMDLERAKRKLEGLKLAQESIMDLENDKQQSSEKLLKK  
DFETSQLLSKIEDEQSLGAQLQKKIKELQARIEELEEIEAERAARAKVEKQRADLSRELEEIS  
ERLEEAGGATAAQIEMNKKREAEFQKLRDLLEESTLQHEATAAALRKKQADSVAELGEQIDNLQ  
RVKQKLEKEKSEYKMEIDDLSSNMEAVAKAKANLEKMCRTLEDQLSEIKSKNDENLRQLNDLSA  
QRARLQTENGEFGRQLEEKALVSQALTRGKQAFQTQQIEELKRQIEEE--  
AKNALAHAVQSARHDCDLLREQFEEEQEAKAELQRGMSKANSEVAQWRTKYETDAIQRTTEEL  
SKKKLAQRLQEAEEQIEAVNSKCSLEKTKQRLQGEVEDLMI DVERANALANLDKKQRNFDKV  
LAEWKQKYEEGQAELEGAQKEARSLSTELFKMKNSEYETLDQLETLKRENKNLQOEISDLTEQI  
GETGKSIHELEKSKKAVETEKAEIQTALEEAEGTLEHEESKILRVQLELNQVKSEIDRKLAEKD  
EEIEQIKRNSQRITDSMQSTLDSEVRSRNDALRIKKKMEGDLNEMEIQLSHANRQAAEAQKQLR  
NVQAQLKDAQLHLDDAVRGQEDMKEQVAMVERRNTLMQSEIEELRAALEQTERGRKVAEQELVD  
ASERVGLLSQNTSLLNTKKKLEADLVQIQSEVEDTVQEARNAEDKAKKAITDAAMMAEELKKE  
QDTSAHLERMKNLEVTVKDLQHRLEAENLAMKGGKKQLQKLESRVRELESEVEAEQRRGADA  
VKGVRKYERRVKELTYQTEEDKKNVNRLOLDLVKLVKAYKRQSEEAEEQANSHLSKLRKVQ  
HELEEAERADIAESQVNLRAKSRDSG-----

Q90337\_C\_\_carpio\_Myosin\_

MGDGEMECFGPAAIYLRKPERERLESQTI PFDAKTAFSVTDAAEMYLKSTLISIEAGKATVKTH  
CGKTVTVKEDIIFPMNPPKFDKMEDMAMLTHLNEPSVLFNLKDRYAAMMIYTYSGLFCATVNPY  
KWLPVYDAVVVAGYRGKKRIEAPPHIFSI SDNAYQFMLTDRENQSVLITGESGAGKTVNTKRVI  
QYFATIAM-AGPKKAEAVPG-  
GSLEDQIIAANPLLEAYGNAKTIRNDNSSRFGKFIRIHFSGTGKLAKADIETYLLEKSRVTFQL  
SAERSYHIFYQLMTGHKPELLEALLITNPNYDYPMISQGEITVKSIDDVEEFATDIDAIDILGF  
TADEKISISYKLTGAVMHGAMKFKQKQREEQAE PDGNEAADKIAYL MGINSADMLKALCYPRVK  
VGNEMVTKGQTVPQVNNVAVSALCKSVYEKMFVLMVVRINEMLNTNPREYYIGVLDIAGFEIFD  
FNSLEQLCINFTNEKLOQFFNHMTMFVLEQEEYKKEGIEWAFIDFGMDLAACIELIEKPMGIFSI  
LEEECMFPKATDTSFKNKLYDQHLGKCSAFQKPKPGKGKAEAHFSLVHYAGTVDYNINGWLEKN  
KDPLNDSVQLYQKSALKVLALLYVAPE---EAAGKK-  
GGKKKGGSFQTVSAVFRENLGKLMTNLRSTHPIVVRCLIPNESKTPGLMENFLVIHQLRRCNGVV  
EGIRICTKGFPSRIHYGDFKQRYKVLNASVIPEGQFIDNKKATEKLLGSDVDHNQYKFGHTKV  
FFKAGLLGTLEEMRDEKLSLVTMTQALARGYVMRKEFVKMMERREAIYSIQYNIRSFMNKHW  
PWMKVYFKIKPLLKTAESEKEMASMKENFEKMKEDLTKALAKKKELEEKMVSLVQEKNDLLLQV  
TSEENLSDAEERCEGLIKSKIQLEGLKLETTERLEDEEEINAELTAKKRKLEDECSELKKDID  
DLELTLAKVEKEKHATENKVKNLTEEMASQDESIAKLTKEKKALQEAHQQTLDLQAEEDKVNT  
LTKAKTKLEQQVDDLEGSLEQEKKLRMDLERVVRKLEGLKLAQESIMDLENEKQQSDEKIKKK  
DFEISQFLSKIEDEQSLGAQLQKKIKELQARIEELEEIEAERSARAKVEKQRADLSRELEEIS  
ERLEEAGGATAAQIEMNKKREAEFQKMRRDLLEESTLQHEATAAALRKKQADSVAELGEQIDNLQ  
RIKQKLEKEKSEYKMEIDDLSSNMEAVAKAGNLEKMCRTLEDQLSEIKAKSDENSRQLNDMNA  
QRARLQTENGEFSRQLEEKALVSQALTRGKQAFQTQQIEDLKRHVEEEVKAKNALAHAVQSARHD

CDLLREQYEEEEQEAKAELQRGMSKANSEVAQWRKAYETDAIQRTEELEESKKKLAQRLQDAEES  
IEAVNSKCASLEKTKQRLQSEVEDLMI DGERANALANLDKKQRNFDKVLADWKQKYEESQAEL  
EAAQKEARSLSTELFKMKNSYEEALDHLETTLKRENKNLQOEISDLSEQLGETGKSIHEIEKAKK  
TVESEKAEIQTALEEAEGTLEHEESKILRVQLELNQVKSEIDRKLAEKDEEMEQIKRNSQRVLD  
SMQSTLDSEVRSRNDALRVKKKMEGDLNEMEVQLSHANRQAAEAQKQLRNVQGQLKDAQLHLDE  
AVRGQEDMKEQVAMVERRNSLMQAEIEELRAALEQTERGRKVAEQELVDASERVGLLHSQNTSL  
INSKKKLETDLVQVQGEVDDAVQEARNAEEKAKKAITDAAMMAEELKKEQDTSAHLERMKKNME  
LTVKDLQHRLDEAESLAMKGGKKQLQKLESRVHELEAEVEAEQRRGADAVKGVKRYERRVKELT  
YQTEEDKKNVTRLQDLVDNLQLKVKAYKRQAEAEQANTHLSRYRKVQHELEESHERADIAES  
QVNKLRAKSREAGTKKVEE-

A4GWV4\_S\_kneri\_Skeletal --

DAEMEAYGPAAVYLRKPEKERIEAQASPFDAKTAYFVVDADEMYLKGLVKKEGGKATVETDTG  
KTVTIVKEEDIHPRNPPKYDKIEDMVMTHLNEPCVLYNLKERYASWMIYTYSGLFCVVVNPYKW  
LPVYDAVVVGAYRGKKRIEAPPHIFISISDNAYQFMHTDRENQSVLITGESGAGKTVNTKRVIQY  
FATIAA-IGAKKAEPTPG-

GSLEDQIVAANPLLEAYGNAKTVRNDNSSRFGKFIRIHFSTGKGLASADIETYLLKSRVTFQL  
SAERSYHIFYQLMTGHKPELLEALLITTPYDYPMISQGEITVKSINDVEEFIATDTAIDILGF  
TAEKMG IYKLTGAVMHGHNMKFKQKQREEQAE PDGTEVADKISYLLGLNSADMLKYLCYPRVK  
VGNEMVTKGQTPVQVNNAVSALCKSVYEKMFVWVIRINEMLDTKQARQFYIGVLDIAGFEIFD  
YNSLEQLCINFTNEKLLQFFNHMFVLEQEEYKKEGIQWEFIDFGMDLASCIELIEKPMGIFSI  
LEEECMFPKASDITFKNKLHDQHLGKTKAFEKPKPGKGAEAHFSLVHYAGTVDYNITGWLEKN  
KDPLNDSVVQLYQSSNKLLAFLYASGAA---ASGKK-

GGKKKGGSFQTVSAVFRENLGKLMTNLRSTHPPHVRCLIPNESKTPGLMENFLVIHQLRNGLV  
EGIRICRKGFPRIYLGDFKQRYKVLNASVIPEGQFMDNKKASEKLLGSDVDHTQYMFQHTKV  
FFKAGLLGALEEMRDEKLAALVTMTQALCRGYVMRKEFVKMMERRESIYSIQYNIRSFMNVKNW  
PWLKLYFKIKPLLKSAETEKELSOMKENYDKMKTDLATALAKKKELEEKMVSLLQEKNDLQLOV  
ASEVENLSDAEERCEGLIKSKIQLEAKLKETTERLEDEEEINAELTAKKRKLEDECSELKKDID  
DLELTLAKVEKEKHATENKVKNLTEEMASQDESI AKLTKEKKALQEAHQQTLDLQAEEDKVNT  
LTKAKTKLEQQVDDLEGSLEQEKLRMDLERAKRKLEGLKLAQESIMDLENDKQQSDEKIKKK  
EFETSQLLSKIEDEQSLGAQLQKKIKELQACIEELEEEIEAERAARAKVEKQRADLSRELEEIS  
ERLEEAGGATAAQIEMNKKREAEFQKLRRDLEEATLQHEATASALRKKQADSVAELGEQIDNLQ  
RVKQKLEKEKSEYKMEIDDLSSNMEAVAKAKGNLEKMCRTLEDQFSELKSKNDETVRQLNDINA  
QKARLQ TENGEYSRQLEEKALVSQ LTRGKQAF TQQIEEFKRHVEEEVKAKNALAHAVQSARHD  
CDLLTENFEEEEQEAKAELQRGMSKANSEVAQWRKSKYETDAIQRTEELEEAKKKLAQRLQDAEES  
IEAVNSKCASLEKTKQRLQGEVEDLMI DVERANALANLDKKQRNFDKVLAEWKQKYEEGQAEL  
EGAQKEARSLSTELFKMKNSYEEALDQLETMKRENKNLQOEISDLTEQIGETGKSIHELEKAKK  
TVETEKTEIQSALEEAEGTLEHEEAKILRVQLELNQIKGEVDRKLAEKDEEMEQIKRNSQRVMD  
SMQSALDSEVRSRNDALRVKKKMEGDLNEMEIQLSHANRQAAEAQKQLRNVQGQLKDAQLHLDD  
AVRGQEDMKEQVAMVERRNGLMLAEIEELRVVALEQTERGRKVAEQELVDASERVGLLHSQNTSL  
MNTKKKLEADLVQVQGEVEDSVQEARNAEEKAKKAITDAAMMAEELKKEQDTSSHLERMKKNLE  
VTVKDLQHRLDEAENLAMKGGKKQLQKLESRVRELEAEVDAEQRRGADAVKGVKRYERRVKELT  
YQTEEDKKNVRLQDLVDKLQLKVKAYKRQAEAEQANTHMSRLRKVQHEMEEAQERADIAES  
QVNKL RVKSRDAG-----

Q2HX58\_C\_carpio\_Myosin\_ --

DAEMAVYGKAAIFLRKPEKERIEAQSKPFDKASACYVVEPKELYVKGTIKSKDGAKVTIVNTK  
EEKVVKEDEVFPMNPPKFDKIEDMAMMTHLNEPSVLYNLKERYAAWMIYTYSGLFRATVNPYKW  
LPVYDAEVVAACRGKKRMEAPPHIFSVSDNAYQFMLTDRENQSVLITGESGAGKTVNTKRVIQY

FATVAV-HGDKKKEQGPS-

GSLEDQIIAANPLLEAYGNAKTVRNDNSSRFGKFIRIHFGTSGKLASADIETYLLEKSRVTFQL  
PDERGYHIFYQMMTNHKPELIEMTLITTNPYDFPMCSQGQITVASIDDEELMATDSADIDILGF  
SAEEKMGIYKFTGAVLHHGNMFKQKQOREEQAE PDGTEEADKIAYLLGLNSADMLKALCCPRVK  
VGNEFVTKGQTVPQVYNSVSALSXSIIYERMFLWMVVRINQMLDTKQQRNFFIGVLDIAGFEIFD  
FNSMEQLCINFTNEKLQQFFNHMFVLEQEEYKKEGIIWEFIDFGMDLAACIELIEKPMGIFSI  
LEEECMFPKATDTSFKNKLYDQHLGKCNAFQKPKPAKGAEAHFSLVHYAGTVDYIISGWLDKN  
KDPLNESVVQLYQKSSVKKLLATLYPPVE---T--GKK-

GGKRKGGSMQTVSSQFRENLGKLMNTLRSTHHPFVRCLIPNESKTPGLMENFLVIHQLRRCNGVL  
EGIRICRKGFPSTRILYGDYKQRYKVLNASVIPEGQFIDNKKACEKLLGSDIDHDQYRFGHTKV  
FSQAGLLGTLEEMRDEKLAALVTMTQALCRGYVMRREFVKMMERRESIYTIQYNI RSFMNAKHW  
PVMKVVYKIKPLLSAETEKELATMKEDFTKCKENLAKAEAKKKELEEKMVALLQEKNDLQLOV  
ASEENLSDAEERCEGLIKSKIQLAKLLETTERLEDEEEINAELTAKKRKLEDECSVLKKNID  
DLELTLAKVEKEKHATENKVKNLTEEMASQDESI AKLTKEKKALQEAHQOTLDDLQAEEDKVNT  
LTKSKTKLGQOVDDLEGSLEQEKLRMDLERAKRKLKLAQESIMDLENDKQOSDEKLLKK  
DFETSQLLSKIEDEQSLGAQLQKKIKELQARIEELEEIEAERAARAKVEKQORADLSRELEEIS  
ERLEEAGGATAAQIEMNKKREAEFQKLRDLLEESTLQHEATAAALRKKQADSVAELGEQIDNLQ  
RVKQKLEKEKSEYKMEIDDLSSNMEAVAKAKANLEKLCRTLEDQLSEIKSKNDENIRQINDLSA  
QRARLQTENGEFGRQLEEKALVSQLTRGKQAFQTQOTEELKRQIEEEVKAKNALAHAVQ SARHD  
CDLLREQFEEEQEAKAELQRGMSKANSEVAQWRTKYETDAIQRTTEELESKKKLAQRLQEAEEQ  
IEAVNSKCASLEKTKQRLQGEVEDLMI DVERANSLAANLDKKQRNFDKVLAEWKQKYEEGQAE  
EGAQKEARSLSTELFKMKNSEESLDQLETLKRENKNLQOEISDLTEQLGETGKSIHELEKAKK  
AVETEKAEIQTALEEAEGTLEHEESKILRVQLELNQVKGEIDRKLAEKDEEME QIKRNSQRVIE  
SMQSNLDSEVRSRNDALRIKKKMEGDLNEMEIQLSHANRQAAEAQKQLRNIQGGQLKDAQLHLDD  
ALRGQEDMKEQVAMVERRNTLMQAEIEELRAALEQTERGRKVAEQELVDASERVGLLHSQNTSL  
LNTKKKLEADLVQIQSEVDDTIQESRNAEEKAKKAITDAAMMAEELKKEQD TSAHLERMKKNLE  
VTVKDLQHRLEAENLAMKGGKKQLQKLESRVRELEAEIEAEQRRGTDVAVKGVKRYERRVKELS  
YQTEEDKKNINRLQDLVDKLQKLVKAYKRQAEAEQANSHLSKLRKVQHELEEAERADIAES  
QVNKLRAKSRDAG-----

Q05K10\_0\_latipes\_Fast\_s --

DAEMEAYGPAAIFLRKPERERLEAQTA PFDAKTAFVVAEPEEMYLKGLIKKEGGKATVETITG  
KTLTVKEEDIHPMNP KYDKIEDMAMMTHLNEPTVLYNLKERFASWMIYTYSGLFCVVNPNYKW  
LPVYDAQV V NAYRGKKRIEAPPHIFSI SDNAYQFMLTDRENQSILITGESGAGKTVNTRKVIQY  
FATIAV-TGGKKSEGSSG-

GSLEDQIIAANPLLEAYGNAKTVRNDNSSRFGKFIRIHFGTSGKLSADIETYLLEKSRVTFQL  
SAERSYHIFYQLMTGHKPELLEALLITTNPYDYHMISSQGEVTVKSIDDEEFIATDTAIDILGF  
SLEEKLG IYKLTGAVMHGNMFKQKQOREEQAE PDGNEVADKIAYLMGLNSADMLKALCYPRVK  
VGNEMVTKGQTVPQVNNNSVSALCKSVYEKMFVLMVIRINEMLATKQPRQFFIGVLDIAGFEIFD  
YNSLEQLCINFTNEKLQQFFNHTMFVLEQEEYKKEGIEWEFIDFGMDLAACIELIEKPMGIFSI  
LEEECMFPKASDATFKNKLYDQHLGKNKAFKPKPGKGAEAH FSLVHYAGTVDYNVTGWLEKN  
KDPLNDSVVQLYQKSSNKL LALLYASAST---GGSKK-

GGKKGGSFQTVSALFRENLGKLMNTLRSTHHPFVRCLIPNESKTQGLMENFLVIHQLRRCNGVL  
EGIRICRKGFPSTRILYGDYKQRYKVLNAAVIPEGQFMDNKKASEKLLGSDVDHSQYKFGHTKV  
FFKAGLLGTLEEMRDEKLA SLVTMTQALCRGFLMRKEYVKMVERRESILT I QYNVRSFMNVKNW  
PWLKLYFKIKPLLQSAETEKELQEMKGNYEKMTDLAAALAKKKELEEKMVSLVQEKNDLQLOV  
SAETDNLSDAEERCEGLIKSKIQLAKLLETTERLEDEEEINAELTAKKRKLEDECSSELKKNID  
DLELTLAKVEKEKHATENKVKNLTEEMASQDESI AKLTKEKKALQEAHQOTLDDLQAEEDKVNT



LTKAKTKLEQQVDDLEGSLEQEKKLRMDLERAKRKLEGDLKLAQESIMDLENDKQQSDEKIKKK  
DFEISQLLSKIEDEQSLGAQLQKKIKELQARIEELEEIEAERAARAKVEKQRADLSRELEEIS  
ERLEEAGGATSAQIEMNKKREAEFQKLRRDLEESTLQHEATAAALRKKQADSVAELGEQIDNLQ  
RVKQKLEKEKSEYKMEIDDLSSNMEGVAKSKGNLEKMCRTLEDQLSELKAKNDENVRQLNDLNA  
QRARLQTENGEFARQLDEKEALVSQLTRSKQAFQTQQIEELKRQVEEEVKAKNALAHAVQSARHD  
CDLLREQFEEEQEAKAELQRGMSKANSEVAQWRKYETDAIQRTTEELEESKKKLAQRLQEAEEES  
IEAVNSKASLEKTKQRLQGEVEDLMTDVERANSLAANLDKKQRNFDKVLAEWKQKYEESQAEL  
EGAQKEARSLSTELFKMKNSYEEALDQLETMKRENKNLQOEISDLTEQLGETGKSIHELEKAKK  
TVETEKCEIQTALEEAEGTLEHEESKILRVQLELNQVKGEIDRKLAEKDEEIEQIKRNSQRVIE  
SMQSTLDAEVRSRNDALRVKKKMEGDLNEMEIQLSHANRQAAEAQKQLRNVQGQLKDAQLHLDD  
ALRGQEDMKEQVAMVERRNGLMLAEIEELRAALEQTERGRKVAEQELVDASERVGLLHSQNTSL  
LNTKKKLESDFVQVQGEVDDAIQEARNAEEKAKKAITDAAMMAEELKKEQDTSSHLERMKKNLE  
VTVKDLQHRLDEAENLAMKGGKKQLQKLESRVRELESEVESEQRRGADAIKGVRYERRVKELT  
YQTEEDKKNVARLQDLVDKQLKVKAYKRQTEEAEEQANTHMSRLRKVQNELEEAQERADIAES  
QVNKL RVKSREAG-----

Q5NTZ3\_C\_carpio\_Myosin\_

MGDGEMECFGPAAIYLRKPEKERIEAQTPFDAKTAFFVTDAEMYLKSTLVSREGGKATVKTH  
CGKTVTVKEDI FQMNPPKFDKMEDMAMMTHLNEPSVLFNLKERYAAWMIYTYSGLFCATVNPY  
KWLPVFDIVVAGYRGKKIEAPPHIFSIDNAYHSMLTDRENQSILITGESGAGKT VNTKRVI  
QYFATVAM-SGPKKTEAVPG-

GSLEDQIIAANPLLEAYGNAKTIRNDNSSRFGKFIRIHFGTTGKLAKADIETYLLKSRVTFQL  
SAERSYHIFYQLMTGHKPELLEALLITNPNYDYPMISQGEITVKSIDDVEEFIATDTAIDILGF  
TADEKISISYKLTGAVMHGAMKFKQKQREEQAE PDGNEAADK IAYLIGINSADMLKALCYPKMK  
VGNEMVTKGQTVPQVNNAVSALCKSIYEKMF LWMVVRINEMLNTNPREFYIGVLDIAGFEIFD  
YNSLEQLCINFTNEKLQQFFNHTMFVLEQEEYKKEGIEWAFIDFGMDLAACIELIEKPMGIFSI  
LEEECMFPKATDTSFKNKLHDQHLGKSAAFQKPKPAKGPPEAHFSLVHYAGTVDYNIAGWLEKN  
KDPLNDSVVQLYQKSALKVLALLYVAPE---EGGGKK-

AGKKKGGSFQTVSALFRENLAKLMSNLRSTHPHFVRCLIPNESKTPGLMENFLVIHQLRRCNGVL  
EGIRICRKGFP SRIHYGDFKQRYKILNASVIPEGQFIDNKKATEKLLGSIDVDHTQYKFGHTKV  
FFKAGLLGALEEMRDEKLVNLVTMTQALARGYVMRKEFVKMMERREAFSIOYNI RSFMNVKHW  
PWMKVYFKIKPLLKSAESEKEMASMKENFEKMKEDLTKALAKKKELEDKMVSLVQEKNDLLQOV  
TSESENLCDAEERCEGLIKSKIHLGKLEKETNERLEDEEEINAELTAKKRKLEDECSELKKDID  
DLELTLAKVEKEKHATENKVKNLTEEMASQDESIAKLTKEKKALQEAHQQTLDLQAEEDKVNT  
LTKAKAKLEQQVDELEGSLEQEKKLRMDLERVVRKLEGLKLAQESIMDLENEKQQSDEKIKKK  
DFEISQFLSKIEDEQSLGAQLQKKIKELQARIEELEEIEAERAARAKVEKQRADLSRELEEIS  
ERLEEAGGATAAQIEMNKKREADFQKMRRDLEESTLQHEATAAALRKKQADTVAELGEQIDNLQ  
RVKQKLEKEKSEYKMEIDDLTSNMEAVAKAGNLEKMCRTLEDQLSEIKAKSDENSRQLNDMNA  
QRARLQTENGEFSRQLEEKALVSQLTRGKQAFQTQQIEDLKRHVEEEVKAKNALAHAVQSARHD  
CDLLREQYEEEQEAKTELQRGMSKANSEVAQWRKAYETDAIQRTTEELEEAKKKLAQRLQDAEES  
IEAVSSKASLEKTKQRLQGEVEDLMI DGERANALANLDKKQRNFDKVLAEWKQKYEESHAE  
EAAQKEARSLSTELFKMKNSYEEALDHLETLKRENKNLQOEISDLSEQLGETGKSIHELEKAKK  
IVESEKAEIQTALEEAESTLEHEESKILRVQLELNQVKSEIDRKLAEKDEEIEQIKRNSQRVMD  
SMQSTLDSEIRSRNDALRVKKKMEGDLNEMEVQLSHANRQAAEAQKQLRNVQGQLKDAQLHLDE  
AVRGQENMKEQVAMVERRNTLMQAEIEELRAALEQTERGRKVAEQELVDASERVGLLHSQNTSL  
INTKKKLETDLLQVQGEVDDAVQEARNAEEKAKKAITDAAMMAEELKKEQDTSAHLERMKKNME  
VTVKDLQHRLDEAESLAMKGGKKQLQKLESRVHELEAEVEAEQRRGADAVKGVRYERRVKELT

YQTEEDKKNVTRLQDLVDKLLQKVKAYKRQAEAEQANTHLSRYRKVQHELEESHERADIAES  
QVNKLRAKSREAG-----

Q05K07\_O\_latipes\_Fast\_s --

DAEMEQYGPAAIYLRKPERERIEAQTSPFDAKTAFFVVDPEMYLKCKLIKREGGKATVETEGG  
KTVTIVKEDDIHPRNPPKFDKMEDMAMMTHLNEPSVLFNLKERYASWMIYTYSGLFCVVVNPYKW  
LPVYDAQCVSGYRGKKRIEAPPHIFSI SDNAYQFMLTDRENQSILITGESGAGKTVNTKRVIQY  
FATIAA-LGGKKEQQSSG-

GSLEDQIVAANPLLEAYGNAKTVRNDNSSRFGKFIRIHFGSSGKLASADIETYLLKSRVTYQL  
SAERSYHIFYQLMTGHKPELLEALLITNPNYDFPLISMGEITVKSINDVEEFIATDTAIDILGF  
NGEEKLGIYRLTGAVMHGMMKFKQKQREEQAEPDGTVEVPDKIAYLMGLNSADMLKALCYPRVK  
VGNEMVTKGQTVPQVNNVSALCKSVYEKMFVIRINEMLDTKQPRQFFIGVLDIAGFEIFD  
YNSLEQLCINYTNEKLOQFFNHMFVLEQEEYKKEGIEWEFIDFGMDLAACIELIEKPMGIFSI  
LEEECMFPKASDITFKNKLYDQHLGKNKAFKPKPGKGAEAHFAMVHYAGTVDYNI TGWLDKN  
KDPLNDSVVQLYQKSSNKLLCYLYAAGA---GGAKK-

GGKKKGSFQTVSALFRENLAKLMTNLRSTHPHFVRCILIPNESKTPGLMENFLVIHQLRNGLV  
EGIRICTKGFPGRIYLGDFKQRYKVLNASVIPEGQFMDNKKASEKLLGSDVDHSQYKFGHTKV  
FFKAGLLGTLEEMRDEKLASLVMTQALCRGYVMRKEFVKMMERRESIYTIQYNVRSFMNVKNW  
PWLKLYFKIKPLLQSAETEKELQEMKGNYEKMTDLAAALAKKKELEEKMVSLMQEKNDLQLOV  
AAETENLSDAEERCEGLIKSKIQLAKLKETTERLEDEEEINAELTAKKRKLEDECSELKDDID  
DLELTLAKVEKEKHATENKVKNLTEAMASQDESI AKLTKEKKALQEAHQOTLDDLQAEEDKVNT  
LTKSKTKLEQQVDDLEGSLEQEKLRMDLERAKRKLEGLKLAQESIMDLENDKQQSDEKIKKK  
DFEISQLLSKIEDEQSLGAQLQKKIKELQARIEELEEIEAERAARAKVEKQRADLSRELEEIS  
ERLEEAGGATAAQIEMNKKREAEFQKLRRDLEESTLQHEATAAALRKKQADSVAELGEQIDNLQ  
RVKQKLEKEKSEYKMEIDDLSSNMEGVAKSKGNLEKMCRTLEDQLSELKAKNDENVRQLNDLNA  
QRARLQTENGEFSRQLEEKALVSQLTRGKQAFQOIEELKRLVEEEVKAKNALAHGVQSARHD  
CDLLREQFEEQEAELQRGMSKANSEVAQWRTKYETDAIQRTTEELESKKKLAQRLQEAEEES  
IEAVNSKCASLEKTKQRLQGEVEDLMI DVERANSLAANLDKKQRNFDKVLAEWKQKYEESQAE  
EGAQKEARSLSTELFKMKNSEYEEALDQLETMKRENKNLQOEISDLTEQIGETGKSIHELEKAKK  
TVTEKSEIQTALEEAEGTLEHEESKILRVQLELNQVKGEIDRKLAEKDEEMEQIKRNSQRVIE  
SMQSTLDAEVRSRNDALRVKKKMEGDLNEMEIQLSHANRQAAEAQQLRNVOGQLKDAQLHLDD  
ALRAQEDMKEQVAMVERRNGLMLAEIEELRAALEQTERGRKVAEQELVDASERVGLLHSQNTSL  
LNTKKKLESDLVQVQGEVDDAIQEARNAEEKAKKAITDAAMMSEELKKEQDTSSHLERMKKNLE  
VTVKDLQHRLDEAENLAMKGGKKQLQKLESRVRELESEVESEQRRGADAIKGVRYERRVKELT  
YQTEEDKKNVARLQDLVDKLLQKVKAYKRQAEAEQANTHMSKLRKVQHELEEAQERADIAES  
QVNKL RVKSRDTG-----

Q98TQ4\_N\_coriiceps\_Myos

MGDSEMECFGPAAIYLRKPARERIEAQTTPFDAKTAFFVTEPSEMFLKGLTKKEGGKATVDTL  
CGKTVTVDTEIFPMNPPKYDKIEDMAMMTHLSEPSVLYNLKERYAAWMIYTYSGLFCVTVNPY  
KWLPVYDSKVVNGYRGKKRIEAPPHIFSI SDNAYQFMLQDRENQSILITGESGAGKTVNTKRVI  
QYFATIAVAGGKKMEQAS---

GSLEDQIIAANPLLESYGNAKTIRNDNSSRFGKFIRIHFGTTGKLASADIETYLLKSRVTFQL  
SAERSYHIFYQLMTGHKPEILEALLITKNPNYDYHMISQGEITVKSIDDIEEFIATDAAIDILGF  
TLDEKASMYKQTGAVMHGMMKFKQKQREEQAEPDGTVEADKIAYLMGLNSADLLKALCYPRVK  
VGNEYVTGQTVSQVNNVSALCKSVYEKMFVIRINEMLATKQSRQFFIGVLDIAGFEIFD  
YNSLEQLCINFTNEKLOQFFNHMFVLEQEEYKKEGIEWEFIDFGMDLAACIELIEKPMGIFSI  
LEEECMFPKASDITFKNKLYDQHLGKSAAFQKPKPAKGAEAHFALLHYAGTVDYNV TGWLEKN  
KDPLNDSVVQLYQKSSVKKLLALLYASNA---EAEGKK-

AAKKKGGSFQTVSALFRENLGKLMTNLRSTHHPHFVRCLIPNESKTPGLMQNFLVIHQLRRCNGVL  
EGIRICTKGFPSRIQYADFKQRYKVLNASVIPEGQFMDNKKASEKLLGSIDVDPTQYKFGHTKV  
FFKAGLLGILEEMRDDKLAKLVTMTQALS RGF LSRTEFQKMMERREAIYSVQYNIRSF MNVKTW  
PWMKLYFKIKPLLKSAESEKEMAQMKVDFAKMKEDLAKALS K KKELEEKMVSLLODKNDLQ LQM  
QSEGETL CDAEERCEGLIKAKIQLEAKCKETSERLEDEEEMNGELTAKKRKLEDECESELKKDID  
DLELTLAKVEKEKHATENKVKNLVEEMSSQDEIIAKLTKEKKALQEAHQQTLDLQAEEDKVNT  
LTKARVKLEQQVDDLEGSLEQEKKLRMDLERAKRKLEGDV KLAHETIMDLENDKQQSDEKIKKK  
DFETSQ LLSRIEDEQTL SAQLQKKIKELQARIEELEEIEAERAARAKVEKQORS DLSRELEEIS  
ERLEESGGATSVQIEMNKKREAEFQKLRRDLEESTLQHEATAAALRKKQADSVAELGEQIDNLQ  
RVKQKLEKEKSEYKMEIDDLSSNME SVAKSKVNLEKMCRTLEDQLSEMKT KNEEHVRHVNDIGV  
QRARLLTENGEYSRQMEEKDALISQLTRSKQAF TQOV EEFKRHIEE EVKAKNALAHAVQSARHD  
CDLLREQYEEEQEAKSELQRAMSKANSEVAQWRAYETDAIQRT EELEESKKKLAQRLQDAEES  
IEAVNAK CASLEKTKQRL LAEVEDLMI DVERANALANLDKKQRNFDKVLAEWKQKYEESQAE L  
EGSLKEARSLSTEMFKLKN SYEEALDHLES LKRENKNLQOEISDLTEQIGENGKTLHELEKGGK  
ILEIEKSELQTSLEEA EATLEHEESKILRVQLELTQIKGEVDRKIAEKDEEIDQIKRNSQ RVIE  
SMQSNLDSEVRSRNDALRIKKKMEGDLNEMEIQLSHANRQASEAQKQLRN VQGQLKDSLLHLDE  
ALRGQEDMKEQVAMVERNNLMVAEIEELRAALEQTERCRKVAEQELVDASERVGLLHSQNTSL  
INTKKKLETDLVQIQGEVEDSVQEARNAEKAKKAITDAAMMAEELKKEQDTSSHLERMKKNLE  
VTVKDLQIRLDEAENLAMKGGKQLOKLEARVRELEGEVDAEQRRGAEAIKGV RKYERKVKELS  
YQFEEDKKNISRLQDLVDK LQ LKVKAYKRQSEEAEEQANTHLSKCRKVQH EMEEAERADIAES  
QV NKLRAKSREI-----

Q05K11\_O\_latipes\_Fast\_s --

DAEMEYGPAAIYLRKPERERIEAQTA PFDAKT AFFVVD ADEMYLKCKLIKREGGKATVETEGG  
KT VTVKEDDIHPRNPPKFDK MEDMAMMTHLNEPSVLFNLKERYASWMIY TYSGLFCV VVNPYKW  
LPVYDAQCVSGYRGKKRIEAPPHIFSI SDNAYQFMLTDRENQSILITGESGAGKTVNTKRVIQY  
FATIAA-LGGKKEQQSSG-

GSLEDQIVAANPLLEAYGNAKTVRNDNSSRFGKFIRIHFGSSGKLASADIETYLLEKSRV TYQL  
SAERSYHIFYQLMTGHKPELLEALLITTPYDFPLISMGEITVKSINDVEEFIATDTAIDILGF  
NGEEKLGIYRLTGAVMHGHNMKFKQKQREEQAE PDGTEVADK IAYLMGLNSADMLKALCYPRVK  
VGNEMVTKGQTPVQVNSVSALCKSVYEKMF LWMVIRINEMLDTKQSRQFFIGVLDIAGFEIFD  
YNSLEQLCINYTNEKLQQFFNHTMFVLEQEEYKKEGIEWEFIDFGMDLAACIELIEKPMGIFSI  
LEEECMFPKASD TTFKNKLYDQHLGKNKAF EKPKPGKGAEAHFAMVHYAGTVDYNI TGWLDKN  
KDPLNDSVVQLYQKSSNKLLCYLYAAAGA---GGAKK-

GGKKKGGSFQTVSALFRENLAKLMTNLKSTHHPHFVRCLIPNESKTPGLMENFLVIHQLRRCNGVL  
EGIRICTKGFPSRIQYADFKQRYKVLNASVIPEGQFMDNKKASEKLLGSIDVDHSQYKFGHTKV  
FFKAGLLGTLEEMRDEKLASLVTMTQALCRGYVMRKEFVKMMERRESIYTIQYNVRSFMNVKNW  
PWLKLYFKIKPLLQSAETE K ELQEMKGNYEKMTDLAAALAKKKELEEKMVSLLOEKNDLQ LQV  
AAETENLSDAEERCEGLIKSKIQLEAKK E TTERLEDEEINAELTAKKRKLEDECESELKKDID  
DLELTLAKVEKEKHATENKVKNLTEEMASQDESIAKLTKEKKALQEAHQQTLDLQAEEDKVNT  
LTKSKTKLEQQVDDLEGSLEQEKKLRMDLERAKRKLEGD LKLAQESIMDLENDKQQSDEKIKKK  
DFEISQLLSKIEDEQSLGAQLQKKIKELQARIEELEEIEAERAARAKVEKQRADLSRELEEIS  
ERLEEAGGATSAQIEMNKKREAEFQKLRRDLEESTLQHEATAAALRKKQADSVAELGEQIDNLQ  
RVKQKLEKEKSEYKMEIDDLSSNMEGVAKSKGNLEKMCRTLEDQLSELKAKNDENVRQLNDLNA  
QRARLQ TENG EFSRQLEEKALVSQ LTRGKQAF TQQIEELKRLVEE EVKAKNALAHGVQSARHD  
CDLLREQFEEEQEAKAELQRGM SKANSEVAQWR T KYETDAIQRT EELEESKKKLAQRLQEA EES  
IEAVNSK CASLEKTKQRLQGEVEDLMI DVERANSLANLDKKQRNFDKVLAEWKQKYEESQAE L  
EGAQKEARSLSTELFKMKN SYEEALDQLETMKRENKNLQOEISDLTEQIGETGKSIHELEKAKK

SVETEKSEIQTALEEAEGTLEHEEEAKILRVQLELNQVKGEIDRKLAEKDEELEQIKRNSQRVIE  
SMQSTLDAEVRSRNDALRVKKKMEGDLNEMEIQLSHANRQAAEAQKQLRNVQGQLKDAQLHLDD  
ALRAQEDMKEQVAMVERRNGLMLAEIEELRAALEQTERGRKVAEQELVDASERVGLLHSQNTSL  
LNTKKKLES DLVQVQGEVDDAIQEARNAEKAKKAITDAAMMAEELKKEQDTSSHLERMKKNLE  
VTVKDLQHRLEAENLAMKGGKKQLQKLESRVRELESEVESEQRRGADAIKGVRYERRVKELT  
YQTEEDKKNVARLQDLVDKQLKVKAYKRQAEAEEMANTHMSKLRKVQNEFEEAQERADIAES  
QVNKL RVKSRDTG-----

A4PDX4\_S\_undosquamis\_My --  
DAEMAVYGKAAIYLRKPEKERIEAQSKPFDKAAGYVADVKEYLYKCTILKRDGGKVTVKVLTQ  
EEKTVKEDDVTMPNPPKYDKIEDMAMMTHLNEASVLYSLKERYAAWMIYTYSGLFCATVNPYKW  
LPVYDQEVVNAYRGKKRMEAPPHIFSVSDNAFQNMATDRENQSVLITGESGAGKTVNTRKVIQY  
FATISVGGGEGKKKDAAPG-  
GSLEDQIIAANPLLEAYGNAKTVRNDNSSRFGKFIRIHFGATGKLSSTDIETYLLEKSRVTFQL  
PDERGYHIFYQMMTNHKPELIEMTLITTPYDFPMCSQGQITVASIDDKEELVATDIDAIDILGF  
TGEEKNYIYKLTGAVLHHGNMFKQKQOREEQAE PDGTEADKVSYLLGLNSADMLKALCYPRVK  
VGNEYVTKGQTVPQVNNNSVAALAKSIYERMFLWMVIRINQMLDTKQARQFFIGVLDIAGFEIFD  
FNSMEQLCINFTNEKLQOQFFNHMFVLEQEEYKKEGIWEFIDFGMDLAACIELIEKPMGIFSI  
LEEECMFPKASDTTFKNKLYDQHLGKTKAFEKPKPAKGAEAHFSLVHYAGTVDYNICGWDPKN  
KDPLNDSVVQLYQKSSVKPLPVLYPPVE---TGGGKK-  
GGKKKGGSMQTVSSQFRENLGKLMTNLRSTHPPHVRCLIPNESKTPGLMENFLVIPQLRCNGVL  
EGIRICRKGFPRIYLGDFKQRYKVLNASVIPEGQFIDNKKASEKLLGSDVDHEQYKFGHTKV  
FFKAGLLGTLEEMRDEKLAILVTMTQALCRGYVMRKEFVKMMERRESIYTIQYNI RSFMNVKHW  
PWMKVVYKIKPLLSAETEKELAQMKDNYDKMKTDLATALAKKKELEEKMVSLLOEKNDLQLOV  
ASESENLSDAEERCEGLIKSKIQLEAKLKETHERLEDEEEMNAELTAKKRKLEDECESELKKDID  
DPELTLAKVEKEKHATENKVKSLTEEMASQDESIAKLTKEKKALQEAHQOTLDDLQAEEDKVNT  
LTKAKTKLEQQVDDLEGSLEQEKLRMDLERAKRKLEGLKLAQESIMDLENEKQOSDEKIKKK  
DFETAQLLSKIEDEQSMGAQLQKKIKELQARIEELEEIEAERAARVKVEKQRADLSRELEEIS  
ERLEEAGGATAAQIEMNKKREAEFQKLRDLLEESTLQHEATAAALRKKQADSVAELGEQIDNLQ  
RVKQKLEKEKSEYKMEIDDLSSNMEAVAKSKGNLEKMCRTLEDQSELKTKSDENVRQINDMSA  
QRARLQOTENGEFTRQLEEKALVSQLTRGKQAFQOIEELKRHVEEVKAKNALAHGVQSARHD  
CDLLREQFEEEQEAKAELQRGMSKANSEVSQWRAYETDAIQRTEELEEAKKKLAORLQEAEEQ  
IEAVNSKCASLEKTKQRLQGEVEDLMI DVERANALANLDKKQRNFDKVLAEWKQKYEEGQAE  
EGAQKEARSLSTELFKMKNSYEEALDQLETLKRENKNLQOEISDLTEQIGETGKSIHELEKAKK  
TVETEKAEIQTALEEAEGTLEHEESKILRVQLELNQIKGEVDRKLSEKDEGMEQIKRNSQRVID  
SMQSTLDSEVRSRNDALRIKKKMEGDLNEMEIQLSHANRQAGEAQKQLRNVQGQLKDAQLHLDD  
ALRSQEDLKEQAAMVDRRNGLMVAEIEELRSALEQTERGRKVAEQELVDASERVGLLHSQNTSL  
MNTKKKLES DLVQVQGEVDDTVQEARNAEEKAKKAITDAAMMAEELKKEQDTSAHLERMKKNLE  
VTVKDLQHRLEAENLAMKGGKKQLQKLESRVRELEGEVEGEQRRGADAVKGVRYERRVKELT  
YQTEEDKKNVARLQDLVDKQLKVKAYKRQAEAEEQANGYLSKCRKVQHELEEAERADIAES  
QVNKLRAKSRDAG-----

B2Z9Y7\_X\_laevis\_Larynge -  
GDAEMAVFGAAASFLRKSEKERIEAQNKPFDAKNTVYIDDTNTL FVKGFITARDGDKITVKTED  
GRTETVTESQIYQQNPPKYDKIEDMAMMTHLNEPSVLFNLKERYAAWMIYTYSGLFCITVNPYK  
WLPVYNPEVVAGYRGKKRVEAPPHIFSI SDNAYQSMITDRENQSVLITGESGAGKTVNTRKVIQ  
YFATVAAIGDAGKKKQADN-  
GTLEDQIIQANPLLEAFGNAKTLRNDNSSRFGKFIRIHFGTTGKLSSADIETYLLEKSRVTFQL  
SAERSYHIFYQILTNKIPELIEMLLLTTPYDYPTISQGELKVKSIDDEDEFMATESAIEVLGF

NAEERVSIYKMTGAVMHGHNMKFKQKQREEQAE PDGTEVADKISYLMGLNSADLLKALCYPRVK  
VGNEFVTKSQTVPQVCNSV GALCKSVYEKLF LWMVTRINQQLDTKQPRQFFIGVLDIAGFEIFD  
FNSLEQLCINFTNEK LQQFFNHMFVQE QEYYKKEGIEWEFIDFGMDLAACIELIEKPMGIFSI  
LEEECMFPKATETSFKNKLYEQHLGKCKNF EKPKPGKGKAEAHFSLVHYAGIVDYNISGWLDKN  
KDPLNDSVVQLYQKSSVKLLSFLYSSYASADSSSKGGGKGGKSSSFQTVSAVFRENLNKLMTN  
LRSTHPHFVRCLIPNETKTPGIMDNYLIHQ LRCNGVLEGIRICTKGFPSRIQYGDFKQRYKIL  
NASAI PDGQFIDSKKAAEKLLGSI DVDHNQYRFGHTKVFFKAGLLGTLEEMRDEMLAHVITRIQ  
SYCRGYLMRIEFKMMNSRREALFVIQYNLRSFMNVKHWPWMKLYFKIKPLLKSAETEKEMANIK  
EEYEKIKEALEKAEARKKELEEKMVLLQEKNDLMLQAQAESETLADAEERCE SLIKGKIQLES  
KIKEMTERLEDEEESNAELSAKRRKLEDECSSELKKDIDELEITLSKVEKEKHATENKVKNLTED  
MAALDDNISKVTKEKKS LQEAHQQTLDLQTEEDKVNTLSKAKSKLEQQVDDLEGSLEQEKKLR  
LDLERTKRKLECDLKL TQETVLD FENDKQQAEEERLKKKDYEISQLLSKIEDEQALSSQLQKKIK  
ELQARTEEELEEE IEAERTVRAKAEKQRALITRELEEISERLEEAGGATAVQIEMNKKRENEFQK  
MRRDLEEANLRHETIACNLRKKHADTV AELGEQLDNLQRIKQKLEKEKSELKMEIDDFASNLDN  
TSK LKANFEKLNHVLEDQ LSEAKAKGEEQQRLNDL TTHKARLLSENGELSRQEEKESLISQL  
SRGKQAFIQQIEELKRQLEEETKAKNALAHAVQSARHDCDLLREQFEEEQEAKSELQRSLSKAN  
NEVSQWRNKYETDAIQ RTEEELEEA KKKLAQHLQEAEDQVA AVNSK CASLEKTKQRLQSEVDDLM  
IDVERSNNA AALDKKQRNFDKVLV EWKQKYGEGQAELEAALKECRSLSTEIFKMRNAYEEALE  
LTETLKRENKNLQQEITDLTEHIGESGKSINELDKARKQVEQQKNEMQAAL EEAEGSLEHEETK  
FLRIQLELNQVKSEMDK KIAEKDEEIEQLKRNNQRATDTLQTTLDSEIRSRNEALRLKKMEGD  
LNELEIQLNQANRQAAEAQKQLRNVQTQNKDTLLQLDNKERIESDLKEQI AVLERRTALQLAEI  
EEIRAALMLDRSCKVAEQELADSSERLQLLRSHVNI LTNSKKKLES DVSQ LQSEVEESI QEAR  
NTEEKAKKAITDAALMAEELKKEQD TSAHLVRMKNLEQTVKDLQHR LDEAEQLALKGKKQLQ  
KLETRVRELENELENEQKRGVEAVKGV RKYERRMKELTYQNEEDRKNVLR LQDLVDK LQLKVK  
YKRQAE EAEQ ANAHMARYRKMQH ELGEAEERADIADSQV NKLRAKSRDIGSK-----

UPI000D9E164\_M\_mulatta

NPPKFDRIEDMAMLTHLNEPAVLYNLKDRYTSWMIYVSKG-  
FCRASPLYKFIPKHKII IKAYRGKKRQEAPPHIFSI SDNAYQFMLTDRENQSILITGESGAGK  
TVNTKRVIQYFATIAATGDLAKKKDS---  
GTLEDQIISANPLLEAFGNAKTVRNDNSSRFGKFIRIHFGTTGKLASADIETYLLKSRVTFQL  
KAERSYHIFYQILSNKKPELIELLLITTPYDYPFISQGEILVASIDDAEELLATDSAIDILGF  
TPEEKSGLYKLTGAVMHYGNMKFKQKQREEQAE PDGTEVADKTAYLMGLNSSDLLKALCFPRVK  
VGNEYVTKGQTVDQVH HAVNALSKSVYEKLF LWMVTRINQQLDTKLPRQHFIGVLDIAGFEIFE  
YNSLEQLCINFTNEK LQQFFNHMFVLEQEYYKKEGIEWTFIDFGMDLAACIELIEKPMGIFSI  
LEEECMFPKATDTSFKNKLYDQHLGKSNNFQKPKVVKGRAEAHFSLIHYAGTVDY SVSGWLEKN  
KDPLNETVVGLYQKSSNRLLAHL YATFATAD---KKK-  
VAKKKGSSSFQTVSALFRENLNK LMSNLRTTHPHFVRCIIPNETKTPGAMEHSLVLHQ LRCNGVL  
EGIRICRKGFPNRILY GDFKQRYRVLNASAIPEGQFIDSKKACEKLLASIDIDHTQYKFGHTKV  
FFKAGLLGTLEEMRDDR LARLITRTQAVCRGFLMRVEFQK MVQRRESIFCIQYNIRSF MNVKHW  
PWMKLF FFKIKPLLKSAETEKEMATMKEEFQKTKDELAKSEAKRKELEEKLVTLVQEKNDLQ LQV  
QAESENLLDAEERC DQLIKAKFQLEAKI KEVTERAEDEEINAELTAKKRKLEDECSSELKKDID  
DLELTLAKVEKEKHATENKVKNL TEELSGLDETI AKLTREKKALQEAHQQALDDLQAEEDKVNS  
LNKTKSKLEQQVEDLESSLEQEKKLRVDLERNKRKLEGDLKLAQESILDLENDKQQ LDERLKKK  
DFEYCQLQSKVEDEQTLGLQFQKKIKELQARIEELEEIEAERATRAKTEKQRS DYARELEELS  
ERLEEAGGVSTSTQIELNKKREAEFLKLRDL EEA TLQHEAMVATLRKKHADSVAELGEQIDNLQ  
RVKQKLEKEKSEFKLEIDDLSSSMESVSKSKANLEKICRMLEDQLSEARGKNEEIQRSLS ELTT

QKSRLQTEAGELSRQLEEKESIVSQLSRSKQAFQTQQIEELKRQLEENKAKNALAHALQSSRH  
CDLLREQYEEEQEGKAELQRALSKANSEVAQWRKYETDAIQRTEELEEAKKKLAQRLQDSEEQ  
VEAVNAKCASLEKTKQRLQGEVEDLMVDVERANSLAAALDKKQRNFDKVLAEWTKCEESQAE  
EASLKESRSLSTELFKLKNAYEEALDQLETVKRENKNLEQEIADLTEQIAENGKTIHELEKSRK  
QIELEKSDIQLALEEAEAALEHEEAKILRIQLELTQVKSEIDRKIAEKDEEIEQLKRNQRTVE  
TMQSALDAEVRSRNEAIRLKKKMEGDLNEIEIQLSHANRQAAETLKHLSRVQGGQLKDTQLHLDD  
ALRGQEDLKEQLAIVERRANLLQAEVEELRATLEQTERARKLAEQELLDNSNERVQLLHTQNTSL  
IHTKKKLETDLMLQLOSEVEDASRDARNAEEKAKKAITDAAMMAEELKKEQDTSAHLERMKKNLE  
QTVKDLQHRLEAEQLALKGGKKQIQKLETRIRELEFELEGEQKKNTESVKGLRKYERRVKELT  
YQSEEDRKNVLRQLDLVDKLQVKVKSQYKRQAEAEQANAHLTFRKAQHELEEAERADIAES  
QVNKLRAKTRDFTS-----

Q9DGD5\_P\_argentata\_Myos --

DAEMAVYGKAAIYLRKPERERIEAQSKPFDKAACYVADVKELYLKALITKKDGAKVTVKVLTE  
EERTVKEDDVTMPNPPKFDKIEDMAMMTHLNEASVLYNLKERYAAWMIYTYSGLFCA TVNPKYK  
LPVYDSEVVNAYRGKKRMEAPPHIFSVSDNAFQFMLIDRENQSVLITGESGAGKT VNTKRVIQY  
FATISV-GGEKKRDTs---

GSLEDQIIAANPLLEAYGNAKTVRNDNSSRFGKfirvHFGATGKLASADIETYLLEKSRVTFQL  
PDERGYHIFYQMMTNHKPELIEMSLITTPYDFPMCSMGQITVASIDDKVELEATDNAIDILGF  
TSDEKMSIYKMTGAVLHHGSMKFKQKQREEQAE PDGTEDADKVAYLLGLNSADMLKALCYPRVK  
VGNEYVTKGQTVPQVNSVTALAKSIYEKMF LWMVIRINEMLDTKQARQFFIGVLDIAGFEIFD  
FNTLEQLCINFTNEKLQQFFNH TMFVLEQEEYKKEGIVWEFIDFGMDLAACIELIEKPMGIFSI  
LEEECMFPKATDTSFKNKLYDQHLGKNKAFKPKPAKGKAEAHFSLVHYAGTVDYNIAGWLDKN  
KDPLNESVVQLYQKSSVKLLPVLYPPVE---T--GGK-

KGKKKGGSMQTVSAAFRENLGKLMTNLRSTHPHFVRCLIPNESKTPGLMENFLVIHQLRcNGVL  
EGIRICRKGFPSPRI PYADFKQRYKVLNASVIPDGQFMDNKKASEKLLGSDVDHDQYRFGHTKV  
FFKAGLLGTLEEMRDEKLAALVTMTQALCRGYVMRKE FVKMMERREAIYTIQYNVRSFTNVKNW  
PwmkVYYKIKPMLKSAETEkelANMKENYEKMTDLATALAKKKELEEKMVSIVQEKNDLQLOV  
ASEENLSDAEERCEGLIKSKIQMEAKKETSERLEDEEEINAELTAKKRKLEDECSELKKDID  
DLELTLAKVEKEKHATENKVKNLTEEMASQDDSLAKLTKEKKALQEAHQOTLDDLQAEEDKVNT  
LTKAKTKLEQQVDDLEGSLEQEKLRMDLERAKRKLEGLKLAQESIMDLENDKQOTDEKLKKK  
DFEISQLLSKIEDEQSLGAQLQKKIKELQARIEELEEIEAERAARAKVEKQRADLSRELEEIS  
ERLEEAGGATASQIEMNKREAEFQKLRRDLEESTLQHEATAAALRKKQADSVAELGEQIDNLQ  
RVKQKLEKEKSEYKMEIDDLSSNMEAVAKAGNLEKMCRTLEDQLSELKTKNDENVRQINDMSG  
QRARLLTENGEFTRQVEEKEALVSQLTRGKQAFQTQQIEELKRQIEEEVKAKNALAHGVQ SARHD  
CDLLREQFEEEQEAKAELQRGMSKANSEVAQWRSKYETDAIQRTEELEEAKKKLAQRLQDAEEQ  
IEAVNSKCASLEKTKQRLQSEVEDLMI DVERANGLAANLDDKKQRNFDKVLAEWKQKYEEGQAE  
EGAQKEARSLGTELFKMKNSYEESLDQLETMKRENKNLQOEISDLTEQIGETGKSIHELEKAKK  
QVETEKSEIQTALEEAEGTLEHEESKILRVQLELNQVKGEVDRKLAEKDEEME QIKRNSQRVID  
SMQSTLDSEVRSRNDALRIKKKMEGDLNEMEIQLSHANRQAAESQKQLRNVAQLKDAQLHLDD  
AVRAQDDFKEQAAMVERRNGLMMAEIEELRVALEQTERS R KVAEQELVDASERVGLLHSQNTSL  
MNTKKKLEADLVQIQGEVDDTVQEARNAEEKAKKAITDAAMMAEELKKEQDTSSH LERMKKNLE  
VAVKDLQHRLEAEENLAMKGGKKQLQKLESRVRELEAEVEAEQRRGGDAVKGVRKYERRVKELT  
YQTEEDKKNVARLQDLVDKLQKLVKGYKRQAEAEQANVHLSKCRKIQHELEEAERADIAET  
QVNKL RVKSRDIG-----

A8R0Q7\_H\_molitrix\_Myosi --

DAEMAAYGKKTIIYLRKPERERIEAQSKPFDKACTACYVADVKELYLKGTIKSKDGGKVTVLLTK  
EERVAKEEDVYPMNPPKYDKIEDMAMMTHLNEASVLYNLKERYAAWMIYTYSGLFRATVSPYKM

LPVYDPEVVTAYRGKKRMEAPPHIFSVSDNAYQFMQTDRENQSVLITGESGAGKTVNTRKVIQY  
FATVAVSGGDKKKEAS---

GSLEDQIIAANPLLEAYGNTKTVRNDNSSRFGKFIRIHFHGTSGKGLASADIETYLLEKSRVVFQ  
PDERGYHIFYQMMTNHKPEPIEMTLITTPYDFPMCSQGQITVASIDDKVEELDATDSADILGF  
TGEEKMGIYKFTGAVLHHGNMKWKQKQREEHAEPDGNEEADKIAYLGLNSAEMLKGLCYPRVK  
VGNEFVTKGQTVAVQVNSVSALAKSIYERMFLWMVIRINQMLDTKQQRNFYIGVLDIAGFEIFD  
YNSMEQLCINFTNEKLQQFFNHHMLVLEQEEYKKEGIVWEFIDFGMDLASCIELIEKPMGIFSI  
LEEECMFPKASDTSFKNKLYDQHLGKNNAFQKPKPAKGKAEAHFSLVHYAGTVDYINITGWLDKN  
KDPLNESVLQLYQKSSNKLLASLYPAVE---T--TKK-

GGKKKGGSMQTVSSQFRENLGKLMNTLRSTHHPHFVRCLIPNESKTPGLMENFLVIHQLRRCNGVL  
EGIRICRKGFPSPRIQYGDFKQRYKVLNAGVIPEGQFMDNKEASEKLLGSIDIDHDEYRFGHTKV  
FFKAGLLGTLEEMRDEKLATLVMTQALCRGYVMRKEYVKMTERRESIYTIQYNIRSFMNVKHW  
PWMKVVYKIKPLLSAETEKELSGMKEEFTKCKEALAKSEAKKKELEEKMVSLLOEKNDLQLOV  
ASECENLSDAEERCEGLIKSKIQLEAKKLETTERLEDEEEEINAELTAKKRKLEDECESELKKDID  
DLELTLAKVEKEKRATENEVKNLTEEMTSQDESLAKLTKEKKALQEAHQOTLDDLQAEEDKVNT  
LTKSKTKLEQQVDDLEGSLEQEKLRMDLERAKRKLEGLKLSQESVMDLENDKQRSDEKIKKK  
DFETSQLLSKIEDEQSLGAQLQKKIKELQARIEELEEIEAERAARAKVEKQRADLSRELEEIS  
ERLEEAGGANSQAQIEMNKKREAEFQKLRRGLEESTLQHEATAAALRKKQADSVAELGEQIDNLQ  
RVKQKLEKEKSGYKMEIDDLSSNMEAVAKAKGNLEKMCRTLEDQLSEFKSKNDENSRQINDLSA  
QRARFQTENGEFGRQLEEKALVSQLTRGKQAFQTQOIEELKRHIEEEVKAKNALAHAVQ SARHD  
CDLLREQFEEEQEAKAELQRGMSKANSEVAQWRTKYEVDIAIORTGELEESKKKLAQRLQEAEEQ  
VEAVNSKCASLEKTKQRLQAEVEDLMI DVERANGLAANLDKKQKNFDKVLAEWKQKYEEGQAE  
EGAQKEARSLSTELFKMKNSYEESLDQLET LKRENKNLQOEISDLTEQLSETGKGIHELEKAKK  
TVETEKAIEQTALAEAEGTLEHEESKILRVQLELNQVKSEIDRKLAEKDEEME QIKRNSQRIIE  
SMQSTLDSEVRSRNDALRIKKKMEGDLNEMEIQLSHANRQAAEARKQLRNVOGQLKDAQLHLDD  
AQRGQEDMKEQVAMVERNALMQSEIEELRAALEQTERGRKVAEQELVDISERVGLPHSQNTSL  
LNTKKKLEADLVQIQSEVDDTVQEARNAEKAQKAITDAALVAEELKKEQDTSSHLERMKKNLE  
VTVKDLQHRLEAENLAMGGKKQLQKLESRVRELETEVEAEQRRGADAVKGVKRYERRVKELT  
YQTDDEDKKNVARLQDLVDKQLKVKVYKRQSEEAEEQANGYLSKLRKVQHELEEAERADISES  
QVNKLRVKSRDAG-----

Q98TQ6\_N\_coriiceps\_Myos --

DAEMSLYGKAAIYLRKPERERIEAQSPFDKASACVSDVKELYLKATLIKKDGGKATVKILTE  
EERVVKEEEVFP LNPPKYDKIEDMAMMTHVNEASVLYNLKERYAAWMIYTYSGLFCATVNPYKW  
LPVYDAECVSAYRGKKRMEAPPHIFSVSDNAYQFMATDRENQSVLITGESGAGKTVNTRKVIQY  
FATISV-SGPKRDASK---

GSLEDQIIAANPLLESYGNKTVRNDNSSRFGKFIRIHFNTAGKGLASADIETYLLEKSRVTFQ  
EEERGYHIFYQMMTGHKPELLELALLTTPYDFPMCSMGKIVVASIDDKVELEATDNAIDILGF  
TNEEKMSIYKMTGAVLHHGNMKFKQKQREEQAE PDGTDADKVAYLLGLNSADMLKGLCYPRVK  
VGNEYVTKGQTVPQVMNSVPALAKSIYERMFLWMVIRINMLDTKQARQFYIGVLDIAGFEIFD  
FNTLEQLCINFTNEKLQQFFNHTMFVLEQEEYKKEGIIWEFIDFGMDLAACIELIERPMGIFSI  
LEEECMFPKASDTSFKNKLYDQHLGKNKAFKPKPSKGKAEAHFSLVHYAGIVDYINISGWLDKN  
KDPLNDSVIQLYMKSSVKLLGLLYPPVE---A--GKK-

GGKKKGGSMQTVSSQFRENLGKLMNTLRSTHHPHFVRCLIPNESKTPGLMENFLVIHQLRRCNGVL  
EGIRICRKGFPSPRIYADFKQRYKVLNPSVIPEGQFMDNKKASEKLLGSVDVPHDEYKFGHTKV  
FFKAGLLGTLEEMRDEKLASLVTLTQALARGYIMRKAFIKMIERREAIYTIQYNIRSFMNVKHW  
PWMKVVYKIKPLLQSAETEKELANMKENYDKMKTDLATALAKKKELEEKMVSLLOEKNDLSLQI  
ASEGENLSDAEERCEGLIKGKIQMEAKKLET SERLEDEEEEINAELTAKKRKLEDECESELKKDID

DLETLAKVEKEKHATENKVKNLTEEMASQDESI AKLTKEKKALQESHQOTLDDLQAEEDKVNT  
LTKAKTKLEQQVDDLEGSLEQEKKLRMDLERAKRKLEGLKLAQESVMDLENDKQQSDEKIKKK  
DFECSQLLSKIEDEQSLGAQLQKKIKELQARIEELEEIEAERAARAKVEKQRADLSRELEEIS  
ERLEEAGGATSAQIEMSKKREAEFQKLRRDLEESTLQHEATAAALRKKQADSVADLGEQIDNLQ  
RVKQKLEKEKSEYKMEIDDLSSNMENVAKAKGNLEKMCRTLEDQLSELKTKNDENVRQINDTSS  
QKARLLTENGEYSRQIEEKEALVSQLTRGKQASTQQIEELKRHIEEEVKAKNALAHGLQSARHD  
CDLLREQFEEEQEAKAELQRGMSKANSEVAQWRKYETDAIQRTEELEESKKKLAQRLQEAEEQ  
IEAVNSKCASLEKTKQRLLEVEDLMI DVERANALANLDKKQRNFDKVLAEWKQKYEEGQAE  
EGAQKEARSLSTELFKMKNSEYEEALDHLETMKRENKNLQQEISDLTEQIGETGKSIHELEKSKK  
QLETEKTEIQTALEEAEGTLEHEESKILRVQLELNQIKGEVDRKLAEKDEEME QIKRNSQRVID  
SMQSTLDSEVRSRNDALRIKKKMEGDLNEMEIQLSHANRQASESQKQLRNVQAQLKDAQLHLDD  
ALRAQEDFKEQAAMVERRNGLMMAEIEELRAALEQTERSRKIAEQELVDASERVGLLHSQNTNL  
VNTKKKLETDLVQIQGEVDDIVQEARNAEEKAKKAITDAAMMAEELKKEQDTSAHLERMKKNLE  
VAVKDLQHRLDEAENLAMKGGKKQLQKLESRVRELEAEVEAEQRRGVDVAVKGVKRYERRVKELT  
YQTEEDKKNVARLQDLVDKQLKVKAYKRQSEDAEEQANTHLSKCRKVQHDMEEAERADIAES  
QVKNLRAKSRDSG-----

Q8JIP5\_0\_\_keta\_Myosin\_he --

DAEMQAYGKAAIYLRKSEKERMEAQATPFDSKNACYVTDKVELYLKGLVTARADGKCTVTVTKE  
EGKEFEEADIYEMNPPKYDKIEDMAMMTYLNEASVLYNLKERYAAWMIYTYSGLFCA TVNPKW  
LPVYDEEVVNAYRGKKRMEAPPHIFSVSDNAFQFM MIDKENQSILITGESGAGKT VNTKCVIQY  
FATIAV-SGSKK-EVDPS-GSLEDQIIAANPLLESYGNAKTVRNDNSSRFGKFIRIHF-  
QAGKLAKADIETYLLEKSRVAFQLPDERGYHIFYQLMTGHKPELVEMTLLTTNPDYDFPMISQGH  
IAVPSINDKEELDATDDAITILGFTNDEKMSIYKLTGAVTHHGNLKFQKQREEQAE PDGTEVA  
DKIGYLLGLNSAELLKCLCYPRVKVGN EYVTKGQTVAVYNAV MALAKSIYERMFLWMVIRINE  
MLDTKNPRQFYIGVLDIAGFEIFDYNSMEQLCINFTNEKLQQFFNHTMFVLEQE EYKKEGIVWE  
FIDFGMDLAACIELIEKPLGIFSI LEEECMFPKASDTTFKNKFYDQHLGKTKAF EKPKPAKGKP  
EAHFSLVHYAGTVDYNITGWLDKNKDPLNESVILMYGKASVKLLATLYPAPP---EDKAKK-  
GGKKKGGSMQTVSSQFRENLHKLMTNLRSTHPHFVRCLIPNESKTPGLMENFLVIHQ LRCNGVL  
EDLRI CRKGFPSRIIYADFKQRYKVLNASVIPEGQFMDNKKASEKLLG SIDVNHEDYKFGHTKV  
FFKAGLLGVLEEMRDEKLAALVGMVQALS RGFMRREFSKMMERRESIFSIQYNI RSFMNVKTW  
PWMKLYFKIKPLLQSAETE KELANMKENYEKMTDLAKALATKKHLEEKLV ALVQERADLALQV  
ASEGQSLNDAEERCEGLIKSKIQLEAKLKEMTERLEDEEEMNAELTAKKRKLEDECSELKKDID  
DLETLAKVEKEKHATENKVKNLTEEMASLDESVAKLTKKEKKALQEAHQOTLDDLQAEEDKVNT  
LTKARTKLEQQVDDLEGSLEQEKKLRMDLERAKRKLEGLKLAQESIMDLENDKQQADEKIKKK  
EFETSQLLSKVEDEQSLGAQLQKKIKELQARIEELEEIEAERAARAKVERQRADLSRELEEIS  
ERLEEAGGATSAQIDMNKKREAEFQKLRRDLEESTLQHEATAAALRKKQADSV AELGEQIDNLQ  
RVKQKLEKEKSEYKMEIDDLSSNMEAVAKAKGNLEKMCRTLEDQLSELKTKNDENVRQVNDISG  
QRARLLTENGEFGRQLEEKEALVSQLTRGKQAF TQQVEELKRQIEEEVKAKNALAHGVQSARHD  
CDLLREQFEEEQEAKAELQRGMSKANSEVAQWR TKYETDAIQRTEELEEA KKKLAQRLQDAEET  
IEATNSKCSSLEKTKQRLQGEVEDLMI DVERANAMAANLDKKQRNFDKVLAEWKQKYEEGQAE  
EGAQKEARSMSTELFKLKNSEYEEALDHLET LKRENKNLQQEISDLTEQIGETGKSIHELEKAKK  
TVETEKSEIQTALEEAEGTLEHEESKILRVQLELNQIKGEVDRKIAEKDEEME QIKRNSQRVVD  
SMQSTLDSEVRSRNDALRVKKKMEGDLNEMEIQLSHSNRQASEAQKQLRNVQGQLKDAQLHLDD  
AVRVAEDMKEQAAMVERRNGLMVAEIEELRVALEQTERGRKVAETELVDASERVGLLHSQNTSL  
LNTKKKLETDLVQVQGEVDDIIQEARNAEEKAKKAITDAAMMAEELKKEQDTSSH LERMKKNLE  
VTVKDLQHRLDEAENLAMKGGKKQLQKLEWRVRELETEVEAEQRRGVDVAVKGVKRYERRVKELT



YQTEEDKKNVGRQLQDLVDKLMKVKAYKRHAEEAEAAANQHMSKFRKVQHELEEEAEERADIAET  
QVNKLRAKTRDSG-----

UPI0000DA357F\_R\_norvegi -

SDAEMAI FGEAAPYLKSEKERIEAQNKPFDAKTSVFVAEPKESYVKSVIQSKEGGKVTVKTES  
GATLTVKEDQVFPMPNPKYDKIEDMAMMTHLHEPGVLYNLKERYAAWMIYTYSGLFCVTVNPK  
WLPVYNPEVVAAAYRGKKRQEAPPHIFSI SDNAYQFMLTNRENQSILITGESGAGKTVNTRKVIQ  
YFATIAVTGEKKKEE--SG-

GTLEDQIISANPLLEAFGNAKTVRNDNSSRFGKFIRIHFGTTGKLASADIETYLLEKSRVTFQL  
KAERSYHIFYQITSNKKPELIEMLLITNPNPYDYAFVSQGEITVPSIDDQEELMATDSIDILGF  
SPEEKVSIYKLTGAVMHYGNMKFKQKQREEQAEPDGTEVADKAAYLQSLNSADLLKALCYPRVK  
VGNEYVTKGQTVQQVYNAV GALAKAVYEKMFLWMVTRINQQLDTKQPRQYFIGVLDIAGFEIFD  
-----

PLGIFSI LEEECMF PKATDTSFKNKLYDQHLGKSNNFQKPKPTKGKAEAHFSLIHYAGTVDYNI  
TGWLDKNKDPLNDTVVGLYQKSAMKTLASLSTYASAE---TLK-

GAKKKGSSFQTVSALFRENLNKLMTNLRSTHPIVRCIIPNETKTPGAMEHELVLHQLRCNGVL  
EGIRICRKGFP SRILYGD FQRYKVLNASAIPEGQFIDSKKASEKLLGSIDIDHTQYKFGHTKV  
FFKAGLLG LLEEMRDEKLAQIITRTQAVCRGYLMRVEYQKMLLRRESIFCIQYNIRAFMNVKHW  
PWMKLF FFIKPLLKSAETEKEMATMKEEFQKTKDELAKSEAKRKELEEKMVTLLKEKNDLQLOV  
QSEADSLADAEERCEQLIKNKIQLEAKIKEVTERAEDEEINAELTAKKRKLEDECSELK KDID  
DLELTLAKVEKEKHATENK-----

LEGSLEQEKKL RMDLERAKRKL EGD LKLAQESTMDIENDKQQLDEK LKKKEFEISNLISKIEDE  
QAVEIQLQKKIKELQARIEELEEIEAERASRAKAEKQRS DLSRELEEISERLEEAGGATSAQV  
ELNKKRETEFQKLRRDLEEATLQHEATSALRKKHADSM AELGEQIDNLQRVKQKLEKEKSELK  
MEIDDLSSNAEAIKAKGNLEKMCRTLEDQVSELKSKEEEQQRLINELTAQRARLQTEAGEYSR  
QLDEKDALVSQLSRSKQASTQQIEELKRQLEEEETKAKNALAHALQSSRHDCDLLREQYEEEQEG  
KALQRALSKANSEVAQWR TKYETDAIQRTEELEEA KKKLAQRLQAAEEHVEAVNAK CASLEKT  
KQRLQNEVEDLMLDVERTNAACAALDKKQRNFDKVLSEWRQKYEETQAELESCQKESRTLSTEL  
FKVKNAYEESLDQLETLRRENKNLQQEISDLTEQIAEGGKHIHELEKIKKQVEQEKCEIQAALE  
EAEASLEHEEGKILRIQLELNQVKSEIDRKIAEKDEEIDQLKRNHIRVETMQSTLDAEIRSRN  
DALR-----

DTQLHLDDALRGQEDLKEQLAIVERRANLLQAEIEELRATLEQTERS R KIAEQELLDASERVQL  
LHTQNTSLINTKKKLENDVSQLQSEVEEVIQESRNAEEKAKKAITDAAMMAEELKKEQD TSAHL  
ERMKNLEQTVKDLQHRLDEAEQLALKGKQIQKLEARVRELEGEVENEQKRNAEAVKGLRKH  
ERRVKELTYQTEEDRKNVRLRLQDLVDK LQAKVKS YKRQAEAEEQSNVNLAKFRKLQHELEEEAE  
ERADIAESQVNKL RVKSREVHTK-----

UPI0000DA33E7\_R\_norvegi -----

VNPKWLPVYNPEVVTA YRGKKRQEAPPHIFSI SDNAYQFMLTDRDNQSILITGESGAGKTVNT  
KRVIQYFATIAVTGEKKKEQQPG--NSLEDPDIQLNPAL-CXGMQASVTHTQ-----  
IRLVIGCTGKLASADIETYLLEKSRVTFQLSSERSYHIFYQIMS NKKPELIDLLL ISTNPFDFP  
FVSQGEVTVASIDDSEELLATDNAIDILGFSPEEKVGIYKLTGAVMHYGNMKFKQKQREEQAEP  
DGTEVADKAGYLMGLNSAEMLKGLCCPRVKVGNEYVTKGQNVQQVTNSV GALAKAVYEKMFLWM  
VTRINQQLDTKQPRQYFIGVLDIAGFEIFDFNSLEQLCINFTNEK LQQFFNHMFVLEQEEYKK  
EGIEWEFIDFGMDLAACIELIEKPMGIFSI LEEECMF PKATDTSFKNKLYDQHLGKSNNFQKPK  
PAKGKAEAHFSLVHYAGTVDYNIAGWLDKNKDPLNETVVGLYQKSS LKLLSFLFSNYAGAE---

GKK-

GGKKKGSSFQTVSAVFRENLNKLMNTNLRSTHPPHVRCLIPNETKTPGVMHDHYLVMHQLRRCNGVL  
EGIRICRKGFPSPRILYADFKQRYRILNASAIPEGQFIDSKNASEKLLNSIDVDREQFRFGHTKV  
FFKAGLLGLLEEMRDEKLVTLMTRTQAVCRGYLMRVEFKKMMERREAFICIQYNVRSFMNVKHW  
PWMNLFFKIKPLLSAEAEKEMATMKEDFERAKEELARSEARRKELEEKMVSLLQEKNDLQQLQV  
QSETENLMDAEERCEGLIKSKIQLQLEAKVKELNERLEEEETNSELVAKRNLEDKCSSLKRDI  
DLELTLTKVEKEKHATENKVKNLSEEMTALEETISKLTKEKKSLOEAHQQTLDLQVEEDKVNG  
LMKINVKLEQQTDLEGSLEQEKLRADLERVVRKLEGLKMSQESIMDLENDAAQLEEKLKKK  
EFEMSLLQTRIDDEQILSLQQLQKIKELQARTEELEEEIEAEHTVRAKIEKQSRDLARELEEIS  
ERLEEASGATSAQIEMNKREAEFQKLRRDLEEATLQHEATAATLRKKHADTVAEELGEQIDNLQ  
RVKQKLEKEKSELKMEIDDMASNIEAVSKSKSNMERMCRSVEDQFNEIKAKDDQQTQLIHDLNM  
QKARLQQTQNGELNHQVEEKESLVSQLTQSKQALTOQLEELKRQLEETKAKNALAHALQSSRD  
CDLLREQYEEEQEGKAELQRALSKANSEVAQWRTKYETDAIQRTTEELEEAKKKLAQRLQEAEN  
TEASNSKASLEKTKQRLQGEVDDLMLDLEKANTACATLDKKQRNFDKVLAEWKQKLDQESQAE  
EAAQKESRSLSTEIFKMRNAYEEVVDQLETLRRENKNLQEEISDLTEQIAETGKNLQVEEKT  
QMEQEKSDLQAALEVEEGSLEHEESKILRVQLELSQVKSELDRKVTEKDEEIEQIKRNSQRAVE  
AMQSVLDAEIRSRNDALRLKKKMEGDLNEMEQLSHANRQVAETQKHLRTVQGQLKDSQLHLDD  
AQRSNEDLKEQLAIVERRNGLLQEELEEMKVALEQTERTRRLSEQELLDSSDRVQLLHSONTSL  
INTKKKLEADLAQCQAEVENSIQESRNAEEKAKKAITDAAMMAEELKKEQDTSAHLERMKKNLE  
QTVKDLQHRLEAEQLALKGGKKQIQKLEARVRELESELDAEQKRGAEALKGAHKYERKVKEMT  
YQAEEDRKNILRLQDLVDKQLQAKVKSQYKRAEEAEQANTQLSRCRRVQHELEEEAERADIAES  
QVNKLRAKSRDVGGQKME-

UPI000180BC7B\_C\_intesti -----

AAQYLRLSREKIENQTQKPDGKKYVWFPDKAEAYVKGELIKTEKGGCTIKSIAEGEMTVKEDD  
LQEMNPPRYEKCEDMAGMTFLNEASVLNNLRSRYESFMIYTYSGLFCVTVNPNYKMLPVYAPYVI  
AAYKGRRTTEMPPHLYSIADNAYTEMLNRENQSMLITGESGAGKTVNTKKVIQYFALVAAYGA  
SQDDGK----

GTLEDQIVQCNPAMEAFGNAKTVRNDNSSRFGKFIIRIHFGSTGLLASGDIEHYLLEKSRVIYQQ  
EGERNYHIFYQIISGSKPELIDQLLVTKDPYDYKSIISQGVVSDNLDDGAELLLTDDAFRVLGF  
NQEEITGIYRIMAGIMHQONMKFKNKQREEQAEPDGTEDADKVAYLFGNLSADFIKYICHPRVK  
VGNEYVTKGQSCNQVSYGMGALSGLFGRHFDWLVLKLNQTLSTKLPRSFFIGVLDIAGFEIFD  
SNSFEQLCINFTNEKLQQFFNHMFVLEQEEYKKEGIDWVFIDFGMDLAACIELIEKPLGIMS  
LEEECMFPKASDDTFKDKLYQNHGKSKAFGKP-

VKKTKEYEAHFELYHYAGTVAYNICGWLEKNKDPLNNSVVDLYKKASLKLMTIWEGISPEEASG  
GGKGGKRKGGSFMTVSSLHRQSLNSLMTNLRSTAPHFVRCLIPNERKCPGEMESHVLVHQLRC  
NGVLEGIRICRKGFPNRVPYGFDFKQRYRILNPNAAPEGQFMDSKKASEKLLGSDIDIDHESYKLG  
HTKVFFRAGMIGRLEELRDNKLASIFKLLQARMRGMMLRKEYQKMIERRQACRIIQSNLRAFFG  
MANCEWMKLMFKIKPLLKTAESAKELEEMEKEFAETKVNLEKETKRRKELEEMQVSFIQEKNDL  
VMQLQAQQDQIDDGEDRCDQLIKTKVELDGKIKELTERLEDEEELNNELVSKKRKLEDECSELK  
KDIDDLEITLAKVEKEKHATENKLNLEELATQDEQIAKLQKEKKALQEAHQQTLDLQSEED  
KVNSLTKQAKLEQQVDDLEASLEQEKLRMELERTKRKLEGLRLTQETVMDLENDKQRLEEK  
LKKQEFEYSQLATKLEDEQALVSQQLQKIKELQARIEELEEELEAERAAKVEKQRADLSREL  
EELSERLEEAGGATAAQIELNKRREAEFAKLRRELEESNLGHEATVSTLRKKNADTSSEMSEQI  
DNLQRVKQKLEKEKSEMMEIDDLASNVESVTAKLNYEKMARNLQELNETKMKNDNF'TKEVN  
ELNAAKARLSSENGDFGRQLEEREHLMAQLTRSKNSSSQOIDEKRVVEEETKAKAALAHAVQA  
SRHDNDLLREQYEEEQEAKAELQRALSKANAQWRNKYETDAIQRTTEELEEAKKKLAIRLQ  
AEEQVEAMQAKASSLDTKNRLQSELEDLTIDLEKSNSAAAALDKKQRNFDKILAEHKQKAEI

QVELEQSQKEARSLSTELFKMKNAYEESLDALETVKRENKNLQEEIADLTDQLGEGGKSIHELE  
KAKRTLEHERNEMQSALEEAEGAIEGEEESKVLRLQVELAQIKQEFERRLAEKEEEVDNQRNQQ  
RSIESMQTTLDSESKARQEAVRIKKKMEGDLNDLEIQLGHANRQASEAQKQAKSIQSHVKDLEM  
QVDEAQRHAEDLQEQSAVIERRGNLLTAEIEELRSALEQAERGRKLAETELLESSERSNLLHTQ  
NTALINQKRKLEGELOQTMQGEVEESVQEQRNAEDKAKKAIVDAATMAEELKKEQDLSSHLERMK  
KNMEQTVKDLQQLRDEAENIALKGGKKQVQKLETRIRELENELDSEQRNGDSVKSQRKIERRL  
KEVSYQGEEDKKNLTRIQLDLVDKLOIKVKTYKRQAEAEAEQANTNLSKYRKLQHELDDAEERAE  
MAESQLNKMRSKAQEWELEKLQEE

Q25142\_H\_\_roretzi\_Embryo

MATLDLSIFQDAAPYLMSQEEELLVLTQKPDGKKYVWVPNKEKAYIKGEVISIEGGKAKLKTC  
DEGEVTVKEDDLQLMNPFRYNKCEDMVNMTHLNEASVLRNLNDRYTAFMIYTYSGLFCVTVNPNY  
KMLPVYAPYVIQAYRGKRKTEMPHLYSIADNAYTEMLNRENQSMELITGESGAGKTVNTKKVI  
QYFALVAADSVAQNDDK----

GTLEDQIVQCNPAMEAFGNAKTARNDNSSRFGKFIRIHFGATGSLASGDIEHYLLEKSRVIWQQ  
AGERNYHIFYQIISGGKPELIDQLLVTKDPYDFKSIISQGVVVVENLDDAQELLLTDEAFHILGF  
TQEEINGIYRIMAGIMHQONMKFKNKQREEQAE PDGTEDADKVAYLFGMNSADFLKYICHPRVK  
VGNEFVTKGQTVPQVTYSIGGLSKGIFEKHFNLVVKIINQSLSTKLPRSYFIGVLDIAGFEIFD  
FNSFEQLCINFTNEKLQQFFNHMHFVLEQEEYKKEGIDWVFIDFGMDLAACIELIEKPLGIMSI  
LEEECMFPKATDNSFKEKLYQNH LGKTKAFGKP-

VKKTKEFAHFELHHYAGTVAYSVTDWLEKNKEPLNNSVVELYKCKSLKLMQTIWEGVSADDSSG  
GGKGGKRKKGGSFMTVSSMHRESLNKLMTNLRSTAPHFVRCIVPNDTKTPGEMDPHIVLHQLRC  
NGVLEGIRICRKGFPNRLPYGDFKQRYRILNPNVPEGQFVDSKKGSEKILSSLEIDHTQYKLG  
HTKVFFRAGMLGVLEELRDDKLSSIFKLIQARLRGKLMKIEYNKLIQRVAVRVIQSNLRAFFG  
VRDWEWMKLMFKIKPLLQTAAEAEMEQLAENEELKTNYEKEMKRRKELEESQVSLIQEKNDL  
LMQLQSEQDRIEDAEDRCDQLIRTKVELDGKIKEIQERLEDEEELNNELVSKKRKLEDECSELK  
KDIDDLEITLAKVEKEKHATENKLNKLNQEEELASQDEQIAKLQKEKKALQEAHQOTLDDLOSEED  
KANSLTKQKAKLEQQVDDLEASLEQEKLRMDLERTKRKLEGLRRLTQETVMDLENDKQRLEEK  
LKKQEFEYSQLATKLEDEQALVMQLQKKIKELQARIEELEELEAERAARAKVEKQRADLSREL  
EELSERLEEAGGATAAQIELNKRREAEFSKLRRELEESNLAHEATVSTLRKKHADSSAEMSEQI  
DNLQRVKQKLEKEKSEMMEVDDLAANVESITKAKLNYEKMARNLEEQFSESKTKCDNFCKEVN  
ELNAAKARFASENGELSROLEEREHLMAQLTRTKNSSSQIEELKRVVEEETKAKAALAHSVQA  
SRHDNDLLREQYEEEQEAKAELQRALSKANA EVAQWRNKYETDAIQRTEELEEAKKKLATRLQE  
AEEQVEATQAKCASLDKTKNRLQGELEDLIDLERSNSAAAALDKKQRNFDKVL AERKQKEEEI  
QVELEQAQKEARGLSTELFKMKNSYEEESLDALETVKRENKNLQEEIADLTDQLGEGGKSIHELE  
KAKRTLEHERNEIQAALEEAEGAIEGEEESKVLRLQVELAQIKQDFERRLSEKEEEIENTRNQQ  
RALESMQTTLDSESKSRQEAVRMKKKMEGDLNDLEIQLGHATRQASESQKSVKTFQAHVKDLEL  
QVDESQRHSDDLQEQFAVIERRENLIKAEIDELRSALEQAERGRKLAETELLESSERSNLLHTQ  
NTALINQKRKLEGELOQNVQSEVEEAVQEQRNAEEKAKKAITDAAMMAEELKKEQDLSSHLERMK  
KNTEQTVKDLQQLRDEAEQVALKGGKKQVQKLETRVRELENELDSEQRNGESVKNQRKTERKL  
KEVTYQAEEDKKNLVRIQLDLVDKLOIKVKTYKRQSEEAEEQANQNMSKYRKLQHELDDAEERAD  
MAESAFNKLRSKARDM-----

B2RFJ0\_O\_\_dioica\_Myosin\_

LDIRNAPYSAKTACWVPDKEFGYIKGEKLGEKDGKIEVKRIDDKVLYKPEQVEQQNPPKYELL  
EDMANMTNLSEATVIHNLKSRYERFLIYTYSGLFCVTVNPNYKWL PVYDPHVVG CYANKRKTEMP  
PHIFSVSDNAYNDMLRNRENQSMELITGESGAGKTVNTKRVIQYFATVAAIKDDAGADGCKLGT  
LEDQIVAANPAMEAFGNAKTIRNDNSSRFGKFIRIHFGGTGKLSGDI DTYLLEKSRVIFQLPT  
ERCFHIFYQMCTGHKPEINEMCMISTDPYDYQYCSIGEITVKSINDTEELDATDESFDILGFTE

EECTAIYKITAGLMHTGNTEFKQKPREEQAEPDGTEDAEEKIGYLFGINAADWLKAICTPKVKVG  
TEYVTKGQTVQVYYALGAIKAVFDRFLFKWLVDVVNRALSTDLPRNYFIGILDIAGFEIFEFN  
TFEQLCINYTNEKLQOFFNHHMFILQEEYKREGIEWEFIDFGMDLQATIELIEKPLGIMSILE  
EECIVPKATDMTYRDKLQQHLGKTKSIGKLLK-  
KQGFEAHFEIYHYAGTVAYNVTDWLLKNKDPLNNSLVSLFKNSTLSACKKIWESVSADDKGGG  
KKGKQRQKGSFQTVSALHRESLLRLMTNLHATQPHFVRCIIPNEQKRPGFMDNLLVHLQLRN  
GVLEGIRICRKGFPNRVVEYAEWKQRYTILNAKVIPOKGFMDNKKACERLLESLDVSPVYRFGH  
TKLFFKAGVIGOLEELRDDKIGQILTKLQSFIRSKIAKEKYLQVVAERDGMVIANWRAYVQL  
ADWPWMHLIYKIRPLLSAEKRKEMDELKTEYDDIKKQLEIETAMRKKLEDAVVKYTQEKNKFI  
AMNNGEGDALADAEDRAEALSKSKIQLDQGIKELQERLEDEEEEINHDLVNKKAKLEREKRELQK  
DIEELESTLAKVEQEKVSLEEKVKENC DALGNTEEHMDKLAKEKRALQEQHQVLDLQVEEDK  
VHSLAKAKNKMEQLVDDLDLSALSHEKKCRVDLERQKRKLEGLRLNQETIMDLENDKQRLEEKI  
KKAEFESNQIRTKCEDEQALIAQLSKKIKELLARIEELEELEAERAAKAKSEKARMEISRELE  
EFAERLDVATNATTSQIEKSKKRDAELAKLARDMEELTLAQESQIVSLRKKHADHTSEIGETIE  
NLTRIKCKLEKERSEMRMEADDLLSTIDTLTKQRVLLEKQMRRTEDQFNDLQEKYDKSERELSD  
ANASKARGIAEYNEKRLVEEKEAMNSQLNRQKNSVNQQIIEETKRAFEEDSKVKNSLAHQYQNA  
VHDAELLKEQYDDEVECKHELQOQLTKSQGEIQHWKGYETDAIQKTEELEDKAKKLLSTRLDV  
EEQVETISAKCGSLDKSKTRYQGEIETITISLEKTNNQISTLEKKQKTFDKLVEDSVTRQNQLA  
FEVEAANKSARERSTEVYKLRNVYEETIEHTETLMREVKQTQEELVDLQDQONSETQRHISELER  
AKRESEVELNQLQAQYEESEAAVEQEEENKILRIQMELNELKNDYEIRIREKEDDIDSSRNAQR  
STDSLQNSLDAETKSRAEAIKGGKLEGEMADVEVQLAHSSPQKNEFQRQVKDIMAEIKENDIA  
IEEVERVCESIRENFAISNRRNKISSEEIAELRSNFESLERARKVAEGELNEARDRANMLHTQN  
AALMNQKRKYDKDVQALTDEVDEATTEAKNAAEKAKKAVTDAVGMADLRKEQDQSMHLQKSRK  
TLEGVVKELQORLTDTEQQAMKGGKQQORLESKIREMEGELESETRRGCEAQKTLRKRTERKLLK  
ELQYATEEDSKKSSRLQDLADQLQKVKSYKRAEEAEENANKNLALYRKFFHHELDESEERAET  
AEAALCKVRSHSK-----

UPI0000E47670\_s\_purpura

-----

YLQVGKKAQLESQAQSFQDGGKMCWINDDKQGYIKCEILSTKGEECTVKTATGKQVTVKKDDTQQ  
MNPPKFEKIEDMAGMTYLNESVLENLRQRYYSGLIYTYSGLFCVAINPYRRLPIYTDKVVMLY  
KGRRTTEMPPHVYSIADNAYHDMLQNHENQSMLITGESGAGKTENTKKVIQYFANIASVTGGKL  
QQDTPEGGNLEDQVIQTNPPLEAFGNAKTIRNDNSSRFGKFIIRIHFGTSGKLAGADIETYLLEK  
SRVIRQNGVERSYPHYQICSGYRQDVLDLTLLEKCKTYCFQNGQGEVEIDGVDDVEEFKLTDD  
ALDVLGFSFEKMSMYKMCATIMHFGNVEWKQRPREEQAEIESTTIDKVAFLFGINPQELVKN  
LLKPRIKVGNEYVSQGRTKAQVVYVSGALAKAIYNRLFVSWLVQRVNKTLATKATKAFFIGVLDI  
AGFEIFDFNTFEQICINLTNEKLQOFFNHHMFVLEQEEYKREGINWVVIDFGLDLQDTITLIEG  
QMGVFAMLEEECMFPKATDFTFLEKLLKQH-

ANNAKITKPSKNVKKHAVHFEIHHYAGTVDYNVESWLDKNKDPLNEAVVELFRKSTDELLATIF  
TDAAAAG---

RGRGSGRKKGGSFQTVSALHREQLTRLLATLYNTQPHFVRCIIPNEKKAPGVIDAFLVLHLQAC  
NGVLEGIRICRKGFPNRLPFGEFKQRYAILAPSAIPQG-

FLDSRKASDMLLALPLEENEFRMGHTKVFFRAGVLGKLEWRDDRLAEIISMIQAQIRGYLGR  
IEFKKMLDQKGLGVIQRNLRKYLILRNWGWWRLYTKVKPLLNVARAEDEMKAADDVIKKAKEL  
LKKEGDARKAMEEKADLLKEKADLLAQLNSEAESAEIEEKFTKMMSLKADLQTLQDLQDR  
EEEEEDAGASASAARRKLEQESSELKRDIEDLEISLTKSEEEKKQKDAAIRSLNDDIAAQDEVIG  
KLSKEKANLEEEHNKTLDALAQEEKANHLSKVKAKLEASVDELEDGLEHEKKIRADVEKVKRK  
LEGDLKMTQETVEELEHAKREAEESIKKRDFEVSQLNTRLEDEQSLVAQLQRKIKELQARIEEL  
EEELEAERQNRKAQKQADVTRELEDLGRLEEQGGATAAQIEVNKRREAELSCLKREIEDQI

VQHESVASQLRKKHTDSVAELTENLESVNRNKSMEKERTQLRVELEDVSSNMDYITKAKLNAE  
KSCHQLESQLESEANAALNERDRAINLQNSKSRGSENSDLARQLEDLENQLSQLNKTRMSLSM  
QMEEYKRSSDEESRAKNSLASQLRQLQADNDQLRDQVEEESSEARAQEVQRILTKVNGELNQMRAK  
FDGEAVQRAEELAAKRLMIRLAQVEEELSALSNGSLEKTKARLTGEVEDLQLDLERSNQL  
CATLEKKQRNFDKDLAVWKEKCESLAVELDMSQREARTYSTELEFKVKNSYEESELEIVNVRDN  
KSLQDEIQDLTDQLGEGGKNCHELQKLVKRLELEKDELVALEEAHLEAAEAKVIRAQLEIT  
QVKQECRRRIIEKDEEFEITRKNHERSMESMQASLEAELKAKSDAQRLKKKLEGEVNDLEIQLD  
HANRNSAEAIKTIKKLQMQVKELQATVDEETRAREDMRDQLQITERRSMMLIQELEEVRSALET  
TERLRKLAEGDLQDANDRLAEVSAQNHVLSNQRRKAEALQTLTAELEDAINEARNNDNAKKA  
IADATRLADELRTQEHSVQIEKFRKSLEVQIKDMQVRLDEAEAAALKGGRRTIEKLEARLRDL  
EGELEMEARRRSDAEKAVRRQERRVKEIIFQSEEDRKITERIQESCDKLTIKCKTLKRQLEESE  
ENVNQNLAKYRNAQRDLEDYEERVELAETQVNKYRAKQR-----

B1PS43\_Homo\_sapiens\_Myos

-----  
-----

KRLVWVPSEKQGFEEASIKKEKGDEVVVELVNGKKTVMGKDDIQKMNPPKFSKVEDMAELTCLN  
EASVLHNLRRERYFSGLIYTYSGLFCVVVNPYKHLPIYSEKIVDMYKGGKRHEMPPHIYAIADTA  
YRSMQLQDREDQSILCTGESGAGKTENTKKVIQYLAVVASSKGGKDTSITEGPGELEKQLLQANP  
ILEAFGNAKTVKNDNSSRFGKFRINFDVTGYIVGANIETYLLEKSRAIRQARDERTFHIFYM  
IAGAKEKMRDLLLL--

EGFNNTYFSLNGFVPIPAAQDDEMFOETVEAMAIMGFSEEEQLSILKVVSSVLQLGNIVFKKER  
NTDQASMPDNTAAQKVCHLMGINVTDFTRSILTPRIKVGDRDVVQKAQTKEQADFAVEALAKATY  
ERLFRWILTRVNKALDTHRQGASFLGILDIAGFEIFEVNSFEQLCINYTNEKQLQLFNHTMFI  
EQEYQREGIEWNFIDFGLDLQPCIELIERPPGVLALLDEECWFPKATDKSFVEKLCTEQ-  
GSHPKFQKPKQLKDKTE--

FSIIHYAGKVDYNASAWLTKNMDPLNDNVTSLNASSDKFVADLWKDDRIVGTESLPSASKTK  
KGMFRTVGQLYKEQLGKLMTTLRNTPNFVRCIIPNHEKRSGKLDLFLVLEQLRCNGVLEGIRI  
CRQGFNRIVFQEFQRQRYEILAANAIPKG-

FMDGKQACILMIKALELDPNLYRIGQSKIIFRTGVLAHLEERDLKITDVIMAFQAMCRGYLAR  
KAFARQQQLTAMKVIQRNCAAYLKLNRWQWWRLFTKVKPLLQVTRQEEEMQAKEDELQKTKER  
QQKAENELKELEQKHSQLEEKNLLOEQLOAETELYAEAEEMRVRLAAKKQEELEILHEMEARL  
EEEEDRGQQLQAERKKMAQQMLDLEEQLEEEEAARQKLQLEKVTAEAKIKKLEDEILVMDDQNN  
KLSKERKLEERISDLTTNLAESEEKAKNLTKLKNKHESMISELEVRLKKEEKSRQELEKLRK  
LEGDASDFHEQIADLQAQIAELKMQLAKKEEELQAALARLDDEIAQKNNALKKIRELEGHISDL  
QEDLDSEARAARNAEKQKRDLGEELEALKTELEDTLSTATQQLRQAKREQEVTVLKKALDEET  
RSHEAQVQEMRQKHAQAVEELTEQLEQFKRAKANLDKNKQTLKENADLAGELRVLGQAKQVE  
HKKKLEAQVQELQSKCSDGERARAELNDKVHKLQNEVESVTGMLNEAEGKAIKLAQDVASLSS  
QLQDTQELLQEEETRQKLNSTKLRQLEEEERNSLQDQLDEEMEAKQNLERHISTLNIQLSDSKK  
LQ-

DFASTVEALEEGKRFQKEIENLTQQYEEKAAAYDKLEKTKNRLQQLDDLVVDLNDNRQLVSN  
LEKKQRKFDQLLAEKNISSKYADERDRAEAEAREKETKALSARALEEAEAKEELERTNKML  
KAEMEDLVSSKDDVGKNVHELEKSKRALETQMEEMKTQLEEELEDELQATEDAKLRLEVNMQALK  
GQFERDLQARDEQNEEKRRQLQRQLHEYETELEDERKQRALAAAANKKLEGLDKDLELQADSAI  
KGRERAIKQLRKLQAQMKDFQRELEDAARSRDEIFATAKENEKAKSLEADLMQLQEDLAAAER  
ARKQADLEKEELAEELASSLSGRNALQDEKRRLEARIAQLEEELEEEQGNMEAMSDRVRKATQQ  
AEQLSNEATERSTAQKNESARQQLERQNKELRSKLHEMEGAVKSKFKSTIAALEAKIAQLEEQ  
VEQEAEREKQAATKSLKQKDKLKEILLQVEDERKMAEQYKEQAEKGNARVKQLKRQLEEAEEES  
QRINANRRKLQRELEDEATESNEAMGREVNALSKSLR-----

end; ;

#### Figure S4. Training Algorithm

The algorithm creates a 3-way classifier that wraps an SVR classifier. The SVR classifier  $M$ , for every  $x$ , gives a prediction  $M(x)$  and probability estimates for both possible targets  $p(x, \text{Pathogenic})$  and  $p(x, \text{Benign})$ . The classifier uses the Radial Basis Function (RBF) kernel, which requires two parameters:  $C$  and  $\gamma$ . The training algorithm performs an exhaustive search to find these parameters, as recommended by the SVR library, libSVM (Chang and Lin).

input: training data  $D$  (consists of 90% of full data set for each cross-validation run, 100% for creation of final classifier), minimum coverage threshold  $tCov$

output: 3-way classifier  $K$

1. search (exhaustively within a range of values) for kernel parameters  $C$  and  $\gamma$  that maximize accuracy on  $D$
2. train SVR model  $M$  on  $D$  using  $C$ ,  $\gamma$
3. compute predictions and probability estimates for data  $D$  using  $M$
4. set thresholds  $tPathogenic$ ,  $tBenign$  that maximize accuracy of  $M$  on  $D$  while keeping coverage above  $tCov$ .
5. Return the following 3-way classifier  $K$ :
  1.  $K(x) = \text{'Benign'}$  if  $M(x) = \text{Benign}$  and  $p(x, \text{Benign}) > tBenign$ ,
  2. else  $\text{'Pathogenic'}$  if  $M(x) = \text{Pathogenic}$  and  $p(x, \text{Pathogenic}) > tPathogenic$ ,
  3. else  $\text{'NoCall'}$

## Figure S5. Validation Algorithm

Ten-fold cross-validation algorithm for the variant classifier.

input: all data  $D$ , minimum coverage threshold  $tCov$

output: average accuracy of the 10-fold cross-validation

$A_{average}$

1. Split  $D$  randomly into 10 parts ( $D_{train\_i}$ )

2. For  $i = 1..10$ :

    2.1 train classifier using  $D_{train\_i}$ ,  $tCov$  to create trained classifier  $K_i$  (procedure in Supplementary Figure S3)

    2.2 apply  $K_i$  to the rest of the data ( $D - D_{test\_i}$ ), compute accuracy  $A_i$

3. Return average( $A_i$ )



### Figure S6. Splice Site Inference

A screenshot of Alamut 1.5 (Interactive Biosoftware, 2009), standard software used for interpreting mutations in clinical laboratories. This shows that the variant MYBPC3 Glu258Lys is predicted to affect splicing. This is an example of the interface clinical laboratories typically use to view splice site predictions.

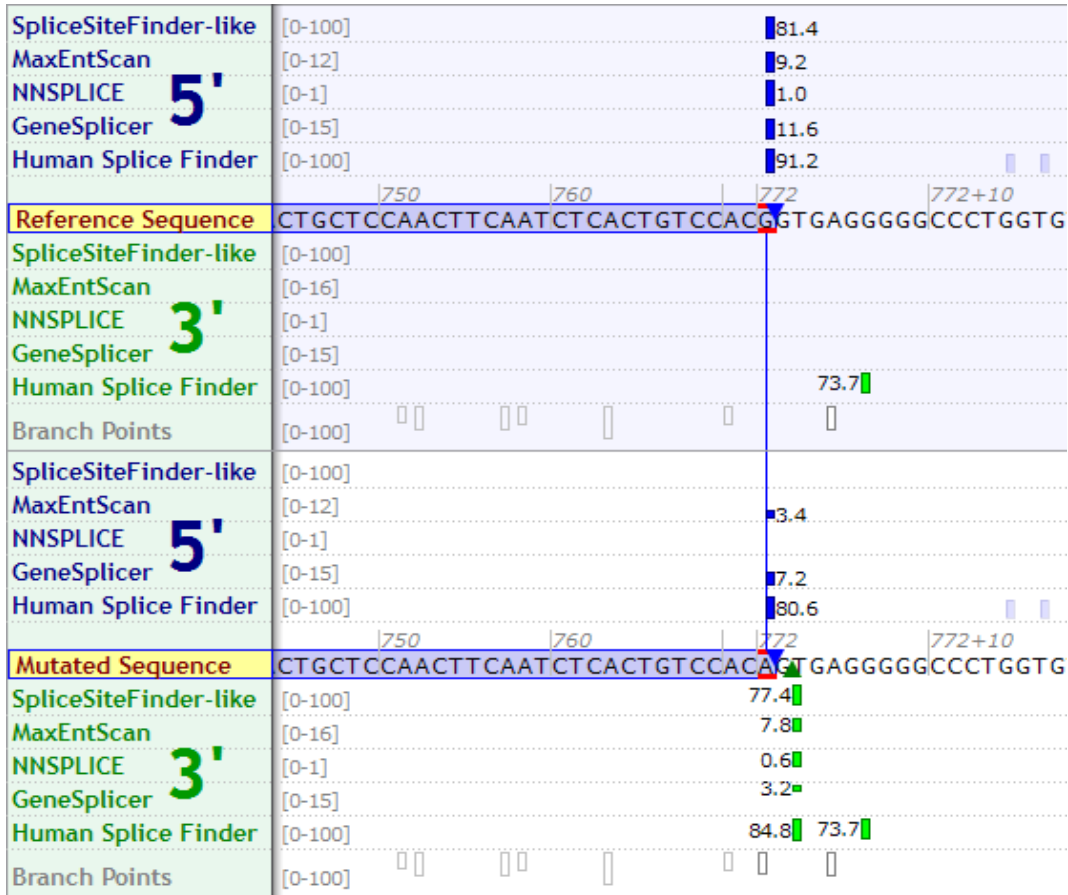

## Supplemental References:

Adzhubei, I. A., Schmidt, S., Peshkin, L., Ramensky, V. E., Gerasimova, A., Bork, P., Kondrashov, A. S. and Sunyaev, S. R. (2010). A method and server for predicting damaging missense mutations. *Nat Methods* 7, 248–249.

Chang, C. C. and Lin, C. J (2001). LIBSVM : a library for support vector machines. Software available at <http://www.csie.ntu.edu.tw/~cjlin/libsvm>

Plon, S. E., Eccles, D. M., Easton, D., Foulkes, W. D., Genuardi, M., Greenblatt, M. S., Hogervorst, F. B., Hoogerbrugge, N., Spurdle, A. B., Tavtigian, S. V. and IARC Unclassified Genetic Variants Working Group (2008). Sequence variant classification and reporting: recommendations for improving the interpretation of cancer susceptibility genetic test results. *Hum Mutat* 29, 1282–1291.

Ronquist, F. and Huelsenbeck, J. P. (2003). MrBayes 3: Bayesian phylogenetic inference under mixed models. *Bioinformatics* 19, 1572–1574.

Smola, A.J. and Schölkopf, B (2004). A tutorial on support vector regression. *Statistics and Computing* 14, 199–222.
